# Supplementary material for: Diverse metastable diarylacetonitrile radicals generated by polymer mechanochemistry
Source: Royal Society of Chemistry journal article supplement (doi:10.1039/d3mr00031a), 2024-01-01
Supplement: d3mr00031a2.pdf [file d3mr00031a2.pdf]

## **Supplementary Information**

### **Diverse Metastable Diarylacetonitrile Radicals Generated by Polymer Mechanochemistry**

Takumi Yamamoto,<sup>1</sup> Daisuke Aoki,<sup>1</sup> Koichiro Mikami,<sup>2</sup> and Hideyuki Otsuka<sup>1,3\*</sup>

<sup>1</sup>Department of Chemical Science and Engineering, Tokyo Institute of Technology, 2-12-1 Ookayama, Meguro-ku, Tokyo 152-8550, Japan

<sup>2</sup>Engineering Division, Process Device Innovation Center, Panasonic Industry Co., Ltd., 1006 Kadoma, Kadoma City, Osaka 571-8506, Japan

<sup>3</sup>Living Systems Materialogy (LiSM) Research Group, International Research Frontiers Initiative (IRFI), Tokyo Institute of Technology, 4259 Nagatsuta-cho, Midori-ku, Yokohama 226-8501, Japan

\*Author to whom correspondence should be addressed: [otsuka@mac.titech.ac.jp](mailto:otsuka@mac.titech.ac.jp)

# **I. Cartesian coordinates of the optimized geometries by DFT calculations**

1.1. DAAN geometries of S<sub>0</sub> state optimized with UM06-2X/6-311+G(d,p)

1.1.1. DAAN-H/H of S<sub>0</sub> state optimized with UM06-2X/6-311+G(d,p)

| Center Number | Atomic Number | Atomic Type | Coordinates (Angstroms) |           |           |
|---------------|---------------|-------------|-------------------------|-----------|-----------|
|               |               |             | X                       | Y         | Z         |
| 1             | 6             | 0           | 2.619986                | -0.559474 | 1.553271  |
| 2             | 6             | 0           | 1.478088                | 0.079083  | 1.090851  |
| 3             | 6             | 0           | 1.263894                | 0.224544  | -0.279274 |
| 4             | 6             | 0           | 2.198588                | -0.275070 | -1.178965 |
| 5             | 6             | 0           | 3.342978                | -0.920348 | -0.714979 |
| 6             | 6             | 0           | 3.554632                | -1.062490 | 0.650135  |
| 7             | 1             | 0           | 2.782785                | -0.666523 | 2.618948  |
| 8             | 1             | 0           | 0.745360                | 0.467684  | 1.791032  |
| 9             | 1             | 0           | 2.036792                | -0.158604 | -2.245572 |
| 10            | 1             | 0           | 4.066923                | -1.307267 | -1.422026 |
| 11            | 6             | 0           | -1.266002               | 0.149249  | -0.366012 |
| 12            | 6             | 0           | -2.287178               | 0.737451  | 0.372192  |
| 13            | 6             | 0           | -1.380427               | -1.187646 | -0.752185 |
| 14            | 6             | 0           | -3.414255               | -0.005121 | 0.721002  |
| 15            | 1             | 0           | -2.210106               | 1.775395  | 0.675899  |
| 16            | 6             | 0           | -2.505415               | -1.923452 | -0.409060 |
| 17            | 1             | 0           | -0.576853               | -1.653150 | -1.313988 |
| 18            | 6             | 0           | -3.527244               | -1.332571 | 0.331470  |
| 19            | 1             | 0           | -4.203384               | 0.462006  | 1.297937  |
| 20            | 1             | 0           | -2.584656               | -2.959642 | -0.715452 |
| 21            | 6             | 0           | -0.031972               | 2.304812  | -0.336175 |
| 22            | 7             | 0           | -0.053744               | 3.395261  | 0.024321  |
| 23            | 1             | 0           | 4.445036                | -1.561840 | 1.012658  |
| 24            | 1             | 0           | -4.404571               | -1.907361 | 0.602551  |
| 25            | 6             | 0           | -0.004590               | 0.905969  | -0.781706 |
| 26            | 1             | 0           | 0.032385                | 0.932845  | -1.875626 |

1.1.2. DAAN-H/Me of S<sub>0</sub> state optimized with UM06-2X/6-311+G(d,p)

| Center Number | Atomic Number | Atomic Type | Coordinates (Angstroms) |           |           |
|---------------|---------------|-------------|-------------------------|-----------|-----------|
|               |               |             | X                       | Y         | Z         |
| 1             | 6             | 0           | -3.021046               | 0.599532  | 0.565308  |
| 2             | 6             | 0           | -3.339257               | -0.671944 | 0.101868  |
| 3             | 6             | 0           | -2.372548               | -1.363760 | -0.636415 |
| 4             | 6             | 0           | -1.134487               | -0.800404 | -0.896525 |
| 5             | 6             | 0           | -0.826454               | 0.480246  | -0.430769 |
| 6             | 6             | 0           | -1.778102               | 1.175840  | 0.302792  |
| 7             | 1             | 0           | -3.751853               | 1.156663  | 1.141594  |
| 8             | 1             | 0           | -2.596254               | -2.359243 | -1.006362 |
| 9             | 1             | 0           | -0.391562               | -1.360376 | -1.455865 |
| 10            | 1             | 0           | -1.560060               | 2.171382  | 0.673197  |
| 11            | 6             | 0           | 0.553931                | 1.048909  | -0.755528 |
| 12            | 1             | 0           | 0.643369                | 1.133751  | -1.843538 |
| 13            | 6             | 0           | 1.677732                | 0.147274  | -0.255581 |
| 14            | 6             | 0           | 2.562391                | -0.439620 | -1.153283 |
| 15            | 6             | 0           | 1.805369                | -0.112310 | 1.108469  |
| 16            | 6             | 0           | 3.570320                | -1.284869 | -0.693756 |
| 17            | 1             | 0           | 2.468170                | -0.235642 | -2.214843 |
| 18            | 6             | 0           | 2.812066                | -0.950067 | 1.566946  |
| 19            | 1             | 0           | 1.111090                | 0.344490  | 1.806635  |
| 20            | 6             | 0           | 3.696254                | -1.540108 | 0.665434  |
| 21            | 1             | 0           | 4.255581                | -1.738935 | -1.399447 |
| 22            | 1             | 0           | 2.908576                | -1.145198 | 2.628203  |
| 23            | 6             | 0           | 0.725856                | 2.406189  | -0.222074 |
| 24            | 7             | 0           | 0.858643                | 3.463713  | 0.206384  |
| 25            | 6             | 0           | -4.681026               | -1.298737 | 0.377142  |
| 26            | 1             | 0           | -5.215776               | -1.496942 | -0.554914 |
| 27            | 1             | 0           | -4.566271               | -2.251183 | 0.899770  |
| 28            | 1             | 0           | -5.302230               | -0.646721 | 0.991771  |
| 29            | 1             | 0           | 4.480731                | -2.195055 | 1.024943  |

1.1.3. DAAN-H/OMe of S<sub>0</sub> state optimized with UM06-2X/6-311+G(d,p)

| Center Number | Atomic Number | Atomic Type | Coordinates (Angstroms) |           |           |
|---------------|---------------|-------------|-------------------------|-----------|-----------|
|               |               |             | X                       | Y         | Z         |
| 1             | 6             | 0           | -3.973261               | -0.705568 | -0.941590 |
| 2             | 6             | 0           | -3.064023               | 0.308738  | -0.645016 |
| 3             | 6             | 0           | -2.045061               | 0.085532  | 0.274876  |
| 4             | 6             | 0           | -1.942318               | -1.161499 | 0.894694  |
| 5             | 6             | 0           | -2.851775               | -2.167780 | 0.603088  |
| 6             | 6             | 0           | -3.871632               | -1.942128 | -0.319297 |
| 7             | 1             | 0           | -4.761632               | -0.521590 | -1.661650 |
| 8             | 1             | 0           | -3.153989               | 1.272718  | -1.133011 |
| 9             | 1             | 0           | -1.136932               | -1.343748 | 1.598936  |
| 10            | 1             | 0           | -2.763504               | -3.130707 | 1.091889  |
| 11            | 6             | 0           | 0.413524                | 0.680245  | 0.473476  |
| 12            | 6             | 0           | 0.873492                | 0.296911  | -0.780209 |
| 13            | 6             | 0           | 1.280194                | 0.598748  | 1.562269  |
| 14            | 6             | 0           | 2.174711                | -0.159731 | -0.959546 |
| 15            | 1             | 0           | 0.206783                | 0.352711  | -1.635061 |
| 16            | 6             | 0           | 2.578033                | 0.141111  | 1.402313  |
| 17            | 1             | 0           | 0.938786                | 0.898224  | 2.547781  |
| 18            | 6             | 0           | 3.032837                | -0.239802 | 0.139019  |
| 19            | 1             | 0           | 2.503010                | -0.447390 | -1.948825 |
| 20            | 1             | 0           | 3.261159                | 0.072551  | 2.239630  |
| 21            | 6             | 0           | -1.235647               | 2.404115  | -0.094088 |

|    |   |   |           |           |           |
|----|---|---|-----------|-----------|-----------|
| 22 | 7 | 0 | -1.399963 | 3.372744  | -0.689549 |
| 23 | 8 | 0 | 4.316200  | -0.672848 | 0.076257  |
| 24 | 6 | 0 | 4.822083  | -1.058240 | -1.185630 |
| 25 | 1 | 0 | 5.852360  | -1.361882 | -1.016428 |
| 26 | 1 | 0 | 4.257201  | -1.900399 | -1.596940 |
| 27 | 1 | 0 | 4.799876  | -0.222563 | -1.891649 |
| 28 | 1 | 0 | -4.579846 | -2.728644 | -0.550515 |
| 29 | 6 | 0 | -1.022088 | 1.157315  | 0.652852  |
| 30 | 1 | 0 | -1.167548 | 1.406491  | 1.709348  |

1.1.4. DAAN-Me/OMe of S<sub>0</sub> state optimized with UM06-2X/6-311+G(d,p)

| Center Number | Atomic Number | Atomic Type | Coordinates (Angstroms) |           |           |
|---------------|---------------|-------------|-------------------------|-----------|-----------|
|               |               |             | X                       | Y         | Z         |
| 1             | 6             | 0           | -3.711151               | -0.048996 | -0.799628 |
| 2             | 6             | 0           | -2.658065               | 0.844568  | -0.603588 |
| 3             | 6             | 0           | -1.660811               | 0.558847  | 0.319298  |
| 4             | 6             | 0           | -1.730758               | -0.635122 | 1.041718  |
| 5             | 6             | 0           | -2.782525               | -1.514703 | 0.845942  |
| 6             | 6             | 0           | -3.793367               | -1.236122 | -0.080625 |
| 7             | 1             | 0           | -4.479416               | 0.189347  | -1.527403 |
| 8             | 1             | 0           | -2.622275               | 1.764493  | -1.176554 |
| 9             | 1             | 0           | -0.946061               | -0.877709 | 1.751416  |
| 10            | 1             | 0           | -2.822067               | -2.437347 | 1.416129  |
| 11            | 6             | 0           | 0.863895                | 0.803457  | 0.429829  |
| 12            | 6             | 0           | 1.203339                | 0.199251  | -0.774354 |
| 13            | 6             | 0           | 1.771561                | 0.754124  | 1.486664  |
| 14            | 6             | 0           | 2.425782                | -0.443826 | -0.936358 |
| 15            | 1             | 0           | 0.502327                | 0.226500  | -1.602679 |
| 16            | 6             | 0           | 2.991534                | 0.113167  | 1.344207  |
| 17            | 1             | 0           | 1.524191                | 1.223987  | 2.432955  |
| 18            | 6             | 0           | 3.325943                | -0.488302 | 0.130071  |
| 19            | 1             | 0           | 2.660985                | -0.901792 | -1.887240 |
| 20            | 1             | 0           | 3.704887                | 0.066831  | 2.157502  |
| 21            | 6             | 0           | -0.535896               | 2.694742  | -0.256466 |
| 22            | 7             | 0           | -0.574397               | 3.625781  | -0.928513 |
| 23            | 8             | 0           | 4.540175                | -1.090355 | 0.080797  |
| 24            | 6             | 0           | 4.926036                | -1.699916 | -1.134059 |
| 25            | 1             | 0           | 5.918977                | -2.108836 | -0.963091 |
| 26            | 1             | 0           | 4.240863                | -2.509023 | -1.405085 |
| 27            | 1             | 0           | 4.968318                | -0.968403 | -1.946741 |
| 28            | 6             | 0           | -4.934394               | -2.199723 | -0.277677 |
| 29            | 1             | 0           | -4.564501               | -3.206283 | -0.484982 |
| 30            | 1             | 0           | -5.554248               | -2.255217 | 0.620779  |
| 31            | 1             | 0           | -5.570777               | -1.892649 | -1.108102 |
| 32            | 6             | 0           | -0.484398               | 1.495075  | 0.590425  |
| 33            | 1             | 0           | -0.562177               | 1.849354  | 1.623912  |

1.1.5. DAAN-OMe/OMe of S<sub>0</sub> state optimized with UM06-2X/6-311+G(d,p)

| Center Number | Atomic Number | Atomic Type | Coordinates (Angstroms) |           |           |
|---------------|---------------|-------------|-------------------------|-----------|-----------|
|               |               |             | X                       | Y         | Z         |
| 1             | 6             | 0           | -2.710831               | -0.573730 | -0.948133 |
| 2             | 6             | 0           | -1.541428               | 0.160701  | -0.783420 |
| 3             | 6             | 0           | -1.285286               | 0.848337  | 0.396303  |
| 4             | 6             | 0           | -2.223028               | 0.789676  | 1.426059  |
| 5             | 6             | 0           | -3.390640               | 0.058030  | 1.281153  |
| 6             | 6             | 0           | -3.641630               | -0.626676 | 0.091321  |
| 7             | 1             | 0           | -2.881651               | -1.095105 | -1.879929 |
| 8             | 1             | 0           | -0.815791               | 0.194433  | -1.589997 |
| 9             | 1             | 0           | -2.040691               | 1.323300  | 2.353137  |
| 10            | 1             | 0           | -4.126196               | 0.003092  | 2.073875  |
| 11            | 6             | 0           | 1.252864                | 0.769276  | 0.394621  |
| 12            | 6             | 0           | 2.278176                | 1.076114  | -0.485412 |
| 13            | 6             | 0           | 1.363828                | -0.385939 | 1.178394  |
| 14            | 6             | 0           | 3.405179                | 0.257185  | -0.594367 |
| 15            | 1             | 0           | 2.215646                | 1.964466  | -1.104038 |
| 16            | 6             | 0           | 2.473190                | -1.201217 | 1.085899  |
| 17            | 1             | 0           | 0.561136                | -0.649395 | 1.859699  |
| 18            | 6             | 0           | 3.505033                | -0.883594 | 0.194354  |
| 19            | 1             | 0           | 4.184557                | 0.526714  | -1.293810 |
| 20            | 1             | 0           | 2.569389                | -2.096212 | 1.687967  |
| 21            | 6             | 0           | 0.017597                | 2.781959  | -0.359507 |
| 22            | 7             | 0           | 0.027104                | 3.668351  | -1.090438 |
| 23            | 8             | 0           | -4.809415               | -1.314186 | 0.037286  |
| 24            | 8             | 0           | 4.551542                | -1.746574 | 0.171692  |
| 25            | 6             | 0           | -5.109854               | -2.012284 | -1.153806 |
| 26            | 1             | 0           | -4.361265               | -2.783648 | -1.359106 |
| 27            | 1             | 0           | -6.077341               | -2.481298 | -0.991447 |
| 28            | 1             | 0           | -5.174716               | -1.329045 | -2.006070 |
| 29            | 6             | 0           | 5.616461                | -1.463825 | -0.712189 |
| 30            | 1             | 0           | 6.341881                | -2.262267 | -0.575487 |
| 31            | 1             | 0           | 5.274812                | -1.455757 | -1.751834 |
| 32            | 1             | 0           | 6.082582                | -0.502864 | -0.473657 |
| 33            | 6             | 0           | 0.007688                | 1.637529  | 0.562071  |
| 34            | 1             | 0           | 0.016985                | 2.061951  | 1.571909  |

1.1.6. DAAN-SM/OMe of S<sub>0</sub> state optimized with UM06-2X/6-311+G(d,p)

| Center Number | Atomic Number | Atomic Type | Coordinates (Angstroms) |   |   |
|---------------|---------------|-------------|-------------------------|---|---|
|               |               |             | X                       | Y | Z |

|    |    |   |           |           |           |
|----|----|---|-----------|-----------|-----------|
| 1  | 6  | 0 | -2.971817 | -0.648666 | -0.962906 |
| 2  | 6  | 0 | -1.852886 | 0.157153  | -0.783127 |
| 3  | 6  | 0 | -1.659227 | 0.864012  | 0.397175  |
| 4  | 6  | 0 | -2.608427 | 0.752272  | 1.412073  |
| 5  | 6  | 0 | -3.726229 | -0.050249 | 1.251772  |
| 6  | 6  | 0 | -3.914705 | -0.754505 | 0.061607  |
| 7  | 1  | 0 | -3.094618 | -1.183724 | -1.894482 |
| 8  | 1  | 0 | -1.117868 | 0.232045  | -1.578380 |
| 9  | 1  | 0 | -2.474822 | 1.300254  | 2.339073  |
| 10 | 1  | 0 | -4.470228 | -0.146720 | 2.032531  |
| 11 | 6  | 0 | 0.877216  | 0.942063  | 0.426149  |
| 12 | 6  | 0 | 1.885974  | 1.302932  | -0.454765 |
| 13 | 6  | 0 | 1.054437  | -0.195573 | 1.220041  |
| 14 | 6  | 0 | 3.056890  | 0.549445  | -0.549817 |
| 15 | 1  | 0 | 1.772680  | 2.180331  | -1.081901 |
| 16 | 6  | 0 | 2.213377  | -0.943444 | 1.137119  |
| 17 | 1  | 0 | 0.267297  | -0.501441 | 1.901791  |
| 18 | 6  | 0 | 3.232245  | -0.578442 | 0.245475  |
| 19 | 1  | 0 | 3.818963  | 0.861369  | -1.251264 |
| 20 | 1  | 0 | 2.336068  | -1.821549 | 1.761290  |
| 21 | 6  | 0 | -0.469973 | 2.876293  | -0.342413 |
| 22 | 7  | 0 | -0.506644 | 3.761722  | -1.073571 |
| 23 | 8  | 0 | -5.036529 | -1.512833 | -0.007590 |
| 24 | 6  | 0 | -5.273053 | -2.234798 | -1.199044 |
| 25 | 1  | 0 | -4.474388 | -2.958873 | -1.386994 |
| 26 | 1  | 0 | -6.211923 | -2.762460 | -1.049375 |
| 27 | 1  | 0 | -5.366323 | -1.561476 | -2.056507 |
| 28 | 6  | 0 | 5.710151  | -0.806282 | -1.016237 |
| 29 | 1  | 0 | 6.619057  | -1.404025 | -1.068163 |
| 30 | 1  | 0 | 5.232946  | -0.802180 | -1.996027 |
| 31 | 1  | 0 | 5.969937  | 0.207544  | -0.712201 |
| 32 | 6  | 0 | -0.420269 | 1.732536  | 0.578681  |
| 33 | 1  | 0 | -0.447509 | 2.154493  | 1.589173  |
| 34 | 16 | 0 | 4.667328  | -1.613216 | 0.218529  |

1.1.7. **DAAN-F/F** of S<sub>0</sub> state optimized with UM06-2X/6-311+G(d,p)

| Center Number | Atomic Number | Atomic Type | Coordinates (Angstroms) |           |           |
|---------------|---------------|-------------|-------------------------|-----------|-----------|
|               |               |             | X                       | Y         | Z         |
| 1             | 6             | 0           | -2.637609               | -0.563873 | -1.321745 |
| 2             | 6             | 0           | -1.496997               | 0.143168  | -0.973732 |
| 3             | 6             | 0           | -1.264351               | 0.506228  | 0.353037  |
| 4             | 6             | 0           | -2.186186               | 0.153073  | 1.331923  |
| 5             | 6             | 0           | -3.334939               | -0.561166 | 1.000921  |
| 6             | 6             | 0           | -3.535422               | -0.904197 | -0.321758 |
| 7             | 1             | 0           | -2.841713               | -0.853838 | -2.344394 |
| 8             | 1             | 0           | -0.777640               | 0.416768  | -1.738664 |
| 9             | 1             | 0           | -2.014602               | 0.436539  | 2.364699  |
| 10            | 1             | 0           | -4.065637               | -0.847159 | 1.746359  |
| 11            | 6             | 0           | 1.271872                | 0.475655  | 0.389911  |
| 12            | 6             | 0           | 2.309088                | 1.004580  | -0.371461 |
| 13            | 6             | 0           | 1.384146                | -0.823927 | 0.888571  |
| 14            | 6             | 0           | 3.450235                | 0.250406  | -0.634651 |
| 15            | 1             | 0           | 2.236763                | 2.011390  | -0.766463 |
| 16            | 6             | 0           | 2.516066                | -1.585017 | 0.639743  |
| 17            | 1             | 0           | 0.571956                | -1.248700 | 1.469003  |
| 18            | 6             | 0           | 3.531175                | -1.028698 | -0.122056 |
| 19            | 1             | 0           | 4.266282                | 0.643811  | -1.226971 |
| 20            | 1             | 0           | 2.621587                | -2.593699 | 1.017960  |
| 21            | 6             | 0           | 0.002794                | 2.585037  | 0.078395  |
| 22            | 7             | 0           | 0.003405                | 3.611163  | -0.437703 |
| 23            | 6             | 0           | 0.005087                | 1.264731  | 0.721686  |
| 24            | 1             | 0           | -0.010188               | 1.450570  | 1.800762  |
| 25            | 9             | 0           | -4.638725               | -1.592258 | -0.653102 |
| 26            | 9             | 0           | 4.627570                | -1.762167 | -0.370351 |

1.1.8. **DAAN-F/OMe** of S<sub>0</sub> state optimized with UM06-2X/6-311+G(d,p)

| Center Number | Atomic Number | Atomic Type | Coordinates (Angstroms) |           |           |
|---------------|---------------|-------------|-------------------------|-----------|-----------|
|               |               |             | X                       | Y         | Z         |
| 1             | 6             | 0           | -3.780151               | -0.071528 | -0.759122 |
| 2             | 6             | 0           | -2.739447               | 0.825207  | -0.528728 |
| 3             | 6             | 0           | -1.690744               | 0.489963  | 0.321891  |
| 4             | 6             | 0           | -1.690284               | -0.760274 | 0.944122  |
| 5             | 6             | 0           | -2.722378               | -1.661405 | 0.729782  |
| 6             | 6             | 0           | -3.751219               | -1.296399 | -0.123341 |
| 7             | 1             | 0           | -4.602129               | 0.170412  | -1.420509 |
| 8             | 1             | 0           | -2.753306               | 1.790454  | -1.021691 |
| 9             | 1             | 0           | -0.866441               | -1.035551 | 1.593893  |
| 10            | 1             | 0           | -2.739010               | -2.634575 | 1.203483  |
| 11            | 6             | 0           | 0.828108                | 0.792482  | 0.451886  |
| 12            | 6             | 0           | 1.225516                | 0.316898  | -0.791672 |
| 13            | 6             | 0           | 1.688344                | 0.638538  | 1.537983  |
| 14            | 6             | 0           | 2.458775                | -0.302039 | -0.963582 |
| 15            | 1             | 0           | 0.563942                | 0.430092  | -1.644857 |
| 16            | 6             | 0           | 2.918318                | 0.019530  | 1.385477  |
| 17            | 1             | 0           | 1.395887                | 1.008407  | 2.515337  |
| 18            | 6             | 0           | 3.310965                | -0.453369 | 0.132273  |
| 19            | 1             | 0           | 2.740432                | -0.657237 | -1.945247 |
| 20            | 1             | 0           | 3.595893                | -0.106474 | 2.220597  |
| 21            | 6             | 0           | -0.617604               | 2.667082  | -0.187412 |
| 22            | 7             | 0           | -0.683293               | 3.613791  | -0.834814 |

|    |   |   |           |           |           |
|----|---|---|-----------|-----------|-----------|
| 23 | 8 | 0 | 4.530399  | -1.041995 | 0.076142  |
| 24 | 6 | 0 | 4.975541  | -1.522817 | -1.176189 |
| 25 | 1 | 0 | 5.963007  | -1.943479 | -1.002537 |
| 26 | 1 | 0 | 4.309892  | -2.302391 | -1.559011 |
| 27 | 1 | 0 | 5.048441  | -0.711541 | -1.906731 |
| 28 | 6 | 0 | -0.536366 | 1.446277  | 0.625668  |
| 29 | 1 | 0 | -0.627301 | 1.769504  | 1.668294  |
| 30 | 9 | 0 | -4.750411 | -2.167453 | -0.340075 |

1.1.9. **DAAN-Br/OMe** of S<sub>0</sub> state optimized with UM06-2X/6-311+G(d,p)

| Center Number | Atomic Number | Atomic Type | Coordinates (Angstroms) |           |           |
|---------------|---------------|-------------|-------------------------|-----------|-----------|
|               |               |             | X                       | Y         | Z         |
| 1             | 6             | 0           | -2.722713               | 0.938711  | -0.666380 |
| 2             | 6             | 0           | -1.508831               | 1.605597  | -0.513854 |
| 3             | 6             | 0           | -0.542210               | 1.124188  | 0.361993  |
| 4             | 6             | 0           | -0.801765               | -0.038985 | 1.088684  |
| 5             | 6             | 0           | -2.008111               | -0.709416 | 0.951583  |
| 6             | 6             | 0           | -2.960666               | -0.211326 | 0.068733  |
| 7             | 1             | 0           | -3.471796               | 1.313739  | -1.351399 |
| 8             | 1             | 0           | -1.325067               | 2.506394  | -1.088400 |
| 9             | 1             | 0           | -0.046186               | -0.432797 | 1.760412  |
| 10            | 1             | 0           | -2.206908               | -1.610462 | 1.517169  |
| 11            | 6             | 0           | 1.982027                | 0.875208  | 0.416477  |
| 12            | 6             | 0           | 2.214854                | 0.246199  | -0.800292 |
| 13            | 6             | 0           | 2.831744                | 0.604990  | 1.488252  |
| 14            | 6             | 0           | 3.275050                | -0.639154 | -0.959929 |
| 15            | 1             | 0           | 1.559550                | 0.447684  | -1.641988 |
| 16            | 6             | 0           | 3.889570                | -0.278253 | 1.347804  |
| 17            | 1             | 0           | 2.667484                | 1.091529  | 2.444194  |
| 18            | 6             | 0           | 4.117735                | -0.904960 | 0.121524  |
| 19            | 1             | 0           | 3.431620                | -1.109611 | -1.920812 |
| 20            | 1             | 0           | 4.556978                | -0.497183 | 2.171838  |
| 21            | 6             | 0           | 0.956652                | 2.982647  | -0.309542 |
| 22            | 7             | 0           | 1.074659                | 3.881252  | -1.015365 |
| 23            | 8             | 0           | 5.175363                | -1.750681 | 0.076014  |
| 24            | 6             | 0           | 5.450830                | -2.400199 | -1.148843 |
| 25            | 1             | 0           | 6.327243                | -3.018416 | -0.970322 |
| 26            | 1             | 0           | 4.613978                | -3.034812 | -1.455869 |
| 27            | 1             | 0           | 5.670757                | -1.675629 | -1.938637 |
| 28            | 35            | 0           | -4.610504               | -1.127650 | -0.136360 |
| 29            | 6             | 0           | 0.800420                | 1.822728  | 0.578076  |
| 30            | 1             | 0           | 0.816940                | 2.216135  | 1.600130  |

1.1.10. **DAAN-Ac/OMe** of S<sub>0</sub> state optimized with UM06-2X/6-311+G(d,p)

| Center Number | Atomic Number | Atomic Type | Coordinates (Angstroms) |           |           |
|---------------|---------------|-------------|-------------------------|-----------|-----------|
|               |               |             | X                       | Y         | Z         |
| 1             | 6             | 0           | -2.472302               | -0.191403 | -1.081940 |
| 2             | 6             | 0           | -1.285648               | 0.496647  | -0.876493 |
| 3             | 6             | 0           | -0.974356               | 0.992029  | 0.387982  |
| 4             | 6             | 0           | -1.859884               | 0.790754  | 1.443850  |
| 5             | 6             | 0           | -3.044650               | 0.096002  | 1.240398  |
| 6             | 6             | 0           | -3.360331               | -0.400198 | -0.023326 |
| 7             | 1             | 0           | -2.700552               | -0.566180 | -2.072427 |
| 8             | 1             | 0           | -0.594420               | 0.652635  | -1.698276 |
| 9             | 1             | 0           | -1.623012               | 1.180904  | 2.428146  |
| 10            | 1             | 0           | -3.743299               | -0.070743 | 2.051371  |
| 11            | 6             | 0           | 1.543367                | 0.781021  | 0.434764  |
| 12            | 6             | 0           | 2.555601                | 1.016919  | -0.481471 |
| 13            | 6             | 0           | 1.611075                | -0.367786 | 1.232290  |
| 14            | 6             | 0           | 3.628236                | 0.131647  | -0.613079 |
| 15            | 1             | 0           | 2.527117                | 1.901276  | -1.108273 |
| 16            | 6             | 0           | 2.666505                | -1.248745 | 1.116347  |
| 17            | 1             | 0           | 0.819285                | -0.575010 | 1.945216  |
| 18            | 6             | 0           | 3.685779                | -1.003929 | 0.187924  |
| 19            | 1             | 0           | 4.400811                | 0.347208  | -1.338250 |
| 20            | 1             | 0           | 2.729779                | -2.139632 | 1.728662  |
| 21            | 6             | 0           | 0.435333                | 2.888859  | -0.259472 |
| 22            | 7             | 0           | 0.504934                | 3.796514  | -0.959962 |
| 23            | 8             | 0           | 4.677868                | -1.926352 | 0.144653  |
| 24            | 6             | 0           | 5.727871                | -1.720169 | -0.778335 |
| 25            | 1             | 0           | 6.407524                | -2.559645 | -0.653676 |
| 26            | 1             | 0           | 5.351913                | -1.704718 | -1.805901 |
| 27            | 1             | 0           | 6.258933                | -0.786600 | -0.568980 |
| 28            | 6             | 0           | -4.654905               | -1.144842 | -0.193323 |
| 29            | 8             | 0           | -5.388966               | -1.317427 | 0.750518  |
| 30            | 6             | 0           | -5.009029               | -1.667470 | -1.566771 |
| 31            | 1             | 0           | -5.063736               | -0.846922 | -2.286086 |
| 32            | 1             | 0           | -4.247100               | -2.367718 | -1.917424 |
| 33            | 1             | 0           | -5.971203               | -2.171079 | -1.510490 |
| 34            | 6             | 0           | 0.348309                | 1.714917  | 0.617434  |
| 35            | 1             | 0           | 0.356376                | 2.095351  | 1.644084  |

1.1.11. **DAAN-COOMe/OMe** of S<sub>0</sub> state optimized with UM06-2X/6-311+G(d,p)

| Center Number | Atomic Number | Atomic Type | Coordinates (Angstroms) |          |           |
|---------------|---------------|-------------|-------------------------|----------|-----------|
|               |               |             | X                       | Y        | Z         |
| 1             | 6             | 0           | -2.710375               | 0.862880 | -0.576758 |
| 2             | 6             | 0           | -1.496614               | 1.537679 | -0.477394 |

|    |   |   |           |           |           |
|----|---|---|-----------|-----------|-----------|
| 3  | 6 | 0 | -0.533437 | 1.114840  | 0.432810  |
| 4  | 6 | 0 | -0.792455 | 0.007973  | 1.246166  |
| 5  | 6 | 0 | -2.000475 | -0.660627 | 1.154119  |
| 6  | 6 | 0 | -2.964636 | -0.234767 | 0.238516  |
| 7  | 1 | 0 | -3.459809 | 1.189046  | -1.286084 |
| 8  | 1 | 0 | -1.306101 | 2.395582  | -1.111887 |
| 9  | 1 | 0 | -0.034415 | -0.333017 | 1.943450  |
| 10 | 1 | 0 | -2.216517 | -1.518239 | 1.779543  |
| 11 | 6 | 0 | 1.985839  | 0.854576  | 0.395929  |
| 12 | 6 | 0 | 2.155480  | 0.192870  | -0.813846 |
| 13 | 6 | 0 | 2.888139  | 0.610557  | 1.430243  |
| 14 | 6 | 0 | 3.204937  | -0.699488 | -1.003155 |
| 15 | 1 | 0 | 1.458357  | 0.373307  | -1.626208 |
| 16 | 6 | 0 | 3.936270  | -0.278812 | 1.259926  |
| 17 | 1 | 0 | 2.773195  | 1.122707  | 2.379945  |
| 18 | 6 | 0 | 4.100898  | -0.938653 | 0.040863  |
| 19 | 1 | 0 | 3.111226  | -1.196786 | -1.957362 |
| 20 | 1 | 0 | 4.643845  | -0.478156 | 2.054887  |
| 21 | 6 | 0 | 0.948137  | 2.962191  | -0.314037 |
| 22 | 7 | 0 | 1.049349  | 3.852158  | -1.033258 |
| 23 | 8 | 0 | 5.153451  | -1.788634 | -0.035492 |
| 24 | 6 | 0 | 5.364342  | -2.472347 | -1.254436 |
| 25 | 1 | 0 | 6.247785  | -3.088105 | -1.104311 |
| 26 | 1 | 0 | 4.511695  | -3.112591 | -1.500263 |
| 27 | 1 | 0 | 5.544484  | -1.770420 | -2.074207 |
| 28 | 6 | 0 | 0.816847  | 1.812287  | 0.590408  |
| 29 | 1 | 0 | 0.871003  | 2.213855  | 1.607824  |
| 30 | 6 | 0 | -4.248105 | -0.990815 | 0.174821  |
| 31 | 8 | 0 | -4.508435 | -1.943578 | 0.861950  |
| 32 | 8 | 0 | -5.093441 | -0.493018 | -0.738612 |
| 33 | 6 | 0 | -6.344858 | -1.173604 | -0.846568 |
| 34 | 1 | 0 | -6.900249 | -0.648152 | -1.618569 |
| 35 | 1 | 0 | -6.185194 | -2.214951 | -1.126508 |
| 36 | 1 | 0 | -6.876951 | -1.137790 | 0.104136  |

1.1.12. DAAN-CN/OMe of S<sub>0</sub> state optimized with UM06-2X/6-311+G(d,p)

| Center Number | Atomic Number | Atomic Type | Coordinates (Angstroms) |           |           | Z |
|---------------|---------------|-------------|-------------------------|-----------|-----------|---|
|               |               |             | X                       | Y         |           |   |
| 1             | 6             | 0           | -2.715586               | -0.600853 | -1.184882 |   |
| 2             | 6             | 0           | -1.587908               | 0.151260  | -0.905043 |   |
| 3             | 6             | 0           | -1.426536               | 0.739615  | 0.349691  |   |
| 4             | 6             | 0           | -2.403591               | 0.566922  | 1.324260  |   |
| 5             | 6             | 0           | -3.537772               | -0.190538 | 1.057036  |   |
| 6             | 6             | 0           | -3.693062               | -0.774340 | -0.199041 |   |
| 7             | 1             | 0           | -2.848661               | -1.058231 | -2.157084 |   |
| 8             | 1             | 0           | -0.820849               | 0.282964  | -1.660777 |   |
| 9             | 1             | 0           | -2.283377               | 1.027042  | 2.298773  |   |
| 10            | 1             | 0           | -4.300504               | -0.329542 | 1.812714  |   |
| 11            | 6             | 0           | 1.100940                | 0.733734  | 0.458425  |   |
| 12            | 6             | 0           | 2.090182                | 1.071753  | -0.450878 |   |
| 13            | 6             | 0           | 1.264841                | -0.418998 | 1.236266  |   |
| 14            | 6             | 0           | 3.234455                | 0.283765  | -0.595070 |   |
| 15            | 1             | 0           | 1.987482                | 1.962234  | -1.061146 |   |
| 16            | 6             | 0           | 2.391228                | -1.204806 | 1.107346  |   |
| 17            | 1             | 0           | 0.493356                | -0.704019 | 1.944898  |   |
| 18            | 6             | 0           | 3.387251                | -0.857273 | 0.185827  |   |
| 19            | 1             | 0           | 3.987052                | 0.577325  | -1.313760 |   |
| 20            | 1             | 0           | 2.530100                | -2.097473 | 1.704313  |   |
| 21            | 6             | 0           | -0.168662               | 2.769244  | -0.175532 |   |
| 22            | 7             | 0           | -0.166711               | 3.710029  | -0.834397 |   |
| 23            | 8             | 0           | 4.453504                | -1.690260 | 0.130439  |   |
| 24            | 6             | 0           | 5.484991                | -1.381034 | -0.785370 |   |
| 25            | 1             | 0           | 6.232457                | -2.162269 | -0.671331 |   |
| 26            | 1             | 0           | 5.111285                | -1.380888 | -1.813764 |   |
| 27            | 1             | 0           | 5.934740                | -0.409703 | -0.558552 |   |
| 28            | 6             | 0           | -4.862426               | -1.560406 | -0.482211 |   |
| 29            | 7             | 0           | -5.797601               | -2.190772 | -0.707695 |   |
| 30            | 6             | 0           | -0.171624               | 1.554018  | -0.484612 |   |
| 31            | 1             | 0           | -0.221254               | 1.887469  | 1.690237  |   |

1.1.13. DAAN-NO<sub>2</sub>/OMe of S<sub>0</sub> state optimized with UM06-2X/6-311+G(d,p)

| Center Number | Atomic Number | Atomic Type | Coordinates (Angstroms) |           |           | Z |
|---------------|---------------|-------------|-------------------------|-----------|-----------|---|
|               |               |             | X                       | Y         |           |   |
| 1             | 6             | 0           | -3.138940               | 0.653495  | -0.697648 |   |
| 2             | 6             | 0           | -1.977461               | 1.392710  | -0.496911 |   |
| 3             | 6             | 0           | -1.008670               | 0.950609  | 0.399610  |   |
| 4             | 6             | 0           | -1.206751               | -0.242433 | 1.100351  |   |
| 5             | 6             | 0           | -2.360326               | -0.985588 | 0.917374  |   |
| 6             | 6             | 0           | -3.307273               | -0.519577 | 0.015201  |   |
| 7             | 1             | 0           | -3.903153               | 0.976121  | -1.391515 |   |
| 8             | 1             | 0           | -1.832875               | 2.316401  | -1.044689 |   |
| 9             | 1             | 0           | -0.443021               | -0.596044 | 1.784140  |   |
| 10            | 1             | 0           | -2.534906               | -1.910148 | 1.450381  |   |
| 11            | 6             | 0           | 1.520175                | 0.856432  | 0.457560  |   |
| 12            | 6             | 0           | 1.823398                | 0.354060  | -0.801762 |   |
| 13            | 6             | 0           | 2.346739                | 0.529920  | 1.532013  |   |
| 14            | 6             | 0           | 2.930971                | -0.462612 | -1.000778 |   |
| 15            | 1             | 0           | 1.189802                | 0.603794  | -1.647235 |   |
| 16            | 6             | 0           | 3.451105                | -0.285907 | 1.351678  |   |
| 17            | 1             | 0           | 2.128692                | 0.920003  | 2.520923  |   |
| 18            | 6             | 0           | 3.749879                | -0.787051 | 0.082989  |   |

|    |   |   |           |           |           |
|----|---|---|-----------|-----------|-----------|
| 19 | 1 | 0 | 3.142731  | -0.834483 | -1.993703 |
| 20 | 1 | 0 | 4.102464  | -0.546551 | 2.176370  |
| 21 | 6 | 0 | 0.368443  | 2.937414  | -0.158233 |
| 22 | 7 | 0 | 0.430011  | 3.877531  | -0.815168 |
| 23 | 8 | 0 | 4.848626  | -1.573328 | 0.001062  |
| 24 | 6 | 0 | 5.195850  | -2.097478 | -1.265660 |
| 25 | 1 | 0 | 6.095390  | -2.687690 | -1.109536 |
| 26 | 1 | 0 | 4.401694  | -2.740255 | -1.657128 |
| 27 | 1 | 0 | 5.405387  | -1.295466 | -1.979664 |
| 28 | 6 | 0 | 0.284099  | 1.722687  | 0.662313  |
| 29 | 1 | 0 | 0.268128  | 2.055097  | 1.705709  |
| 30 | 7 | 0 | -4.539161 | -1.310017 | -0.193480 |
| 31 | 8 | 0 | -5.346577 | -0.887578 | -0.991293 |
| 32 | 8 | 0 | -4.662513 | -2.330777 | 0.447469  |

1.1.14. DAAN-OMe/diOMe of S<sub>0</sub> state optimized with UM06-2X/6-311+G(d,p)

| Center Number | Atomic Number | Atomic Type | Coordinates (Angstroms) |           |           | Z |
|---------------|---------------|-------------|-------------------------|-----------|-----------|---|
|               |               |             | X                       | Y         |           |   |
| 1             | 6             | 0           | 2.763287                | -1.217500 | -0.740722 |   |
| 2             | 6             | 0           | 1.616828                | -0.505013 | -1.084828 |   |
| 3             | 6             | 0           | 1.398875                | 0.783930  | -0.615716 |   |
| 4             | 6             | 0           | 2.353562                | 1.361567  | 0.221220  |   |
| 5             | 6             | 0           | 3.497057                | 0.665158  | 0.574584  |   |
| 6             | 6             | 0           | 3.710181                | -0.628398 | 0.095688  |   |
| 7             | 1             | 0           | 2.898881                | -2.218988 | -1.125676 |   |
| 8             | 1             | 0           | 0.876617                | -0.975557 | -1.724046 |   |
| 9             | 1             | 0           | 2.198922                | 2.362635  | 0.607812  |   |
| 10            | 1             | 0           | 4.243068                | 1.103309  | 1.226015  |   |
| 11            | 6             | 0           | -1.131515               | 0.698730  | -0.851746 |   |
| 12            | 6             | 0           | -1.529800               | 0.339536  | 0.441395  |   |
| 13            | 6             | 0           | -1.899312               | 0.263763  | -1.924706 |   |
| 14            | 6             | 0           | -2.670166               | -0.436976 | 0.651166  |   |
| 15            | 6             | 0           | -3.034221               | -0.512419 | -1.743327 |   |
| 16            | 1             | 0           | -1.601859               | 0.541907  | -2.930546 |   |
| 17            | 6             | 0           | -3.417869               | -0.861060 | -0.450841 |   |
| 18            | 1             | 0           | -2.966747               | -0.702867 | 1.654104  |   |
| 19            | 1             | 0           | -3.634158               | -0.851654 | -2.577097 |   |
| 20            | 6             | 0           | 0.007191                | 2.838084  | -0.423212 |   |
| 21            | 7             | 0           | -0.086561               | 3.881965  | 0.046871  |   |
| 22            | 8             | 0           | 4.859428                | -1.231348 | 0.498231  |   |
| 23            | 8             | 0           | -4.538253               | -1.618556 | -0.346227 |   |
| 24            | 6             | 0           | 5.115520                | -2.536837 | 0.026714  |   |
| 25            | 1             | 0           | 5.184327                | -2.556616 | -1.065512 |   |
| 26            | 1             | 0           | 6.071396                | -2.830315 | 0.454421  |   |
| 27            | 1             | 0           | 4.340081                | -3.235965 | 0.355491  |   |
| 28            | 6             | 0           | -4.978305               | -1.986904 | 0.943828  |   |
| 29            | 1             | 0           | -5.880509               | -2.575822 | 0.796657  |   |
| 30            | 1             | 0           | -4.228491               | -2.595065 | 1.459463  |   |
| 31            | 1             | 0           | -5.215040               | -1.105459 | 1.547775  |   |
| 32            | 6             | 0           | 0.130680                | 1.516479  | -1.056902 |   |
| 33            | 1             | 0           | 0.213901                | 1.716741  | -2.130779 |   |
| 34            | 8             | 0           | -0.740675               | 0.797202  | 1.438477  |   |
| 35            | 6             | 0           | -1.100573               | 0.517759  | 2.775520  |   |
| 36            | 1             | 0           | -2.083716               | 0.935271  | 3.012112  |   |
| 37            | 1             | 0           | -1.098242               | -0.559768 | 2.965859  |   |
| 38            | 1             | 0           | -0.345025               | 0.996673  | 3.393321  |   |

1.1.15. DAAN-OMe/triOMe of S<sub>0</sub> state optimized with UM06-2X/6-311+G(d,p)

| Center Number | Atomic Number | Atomic Type | Coordinates (Angstroms) |           |           | Z |
|---------------|---------------|-------------|-------------------------|-----------|-----------|---|
|               |               |             | X                       | Y         |           |   |
| 1             | 6             | 0           | 3.035438                | 1.013938  | -0.916556 |   |
| 2             | 6             | 0           | 1.867865                | 1.144515  | -0.168659 |   |
| 3             | 6             | 0           | 1.541676                | 0.231871  | 0.826323  |   |
| 4             | 6             | 0           | 2.406733                | -0.834092 | 1.069505  |   |
| 5             | 6             | 0           | 3.572179                | -0.977391 | 0.334961  |   |
| 6             | 6             | 0           | 3.893344                | -0.055562 | -0.662392 |   |
| 7             | 1             | 0           | 3.259595                | 1.744875  | -1.681436 |   |
| 8             | 1             | 0           | 1.196942                | 1.974469  | -0.369674 |   |
| 9             | 1             | 0           | 2.164247                | -1.558251 | 1.839213  |   |
| 10            | 1             | 0           | 4.253946                | -1.799281 | 0.515601  |   |
| 11            | 6             | 0           | -0.984787               | 0.270652  | 0.700207  |   |
| 12            | 6             | 0           | -1.324691               | -0.980688 | 0.188311  |   |
| 13            | 6             | 0           | -1.774969               | 1.369249  | 0.340846  |   |
| 14            | 6             | 0           | -2.433284               | -1.161374 | -0.645164 |   |
| 15            | 6             | 0           | -2.881234               | 1.221573  | -0.487530 |   |
| 16            | 6             | 0           | -3.201336               | -0.046723 | -0.970360 |   |
| 17            | 1             | 0           | -2.680016               | -2.140088 | -1.024253 |   |
| 18            | 1             | 0           | -3.511008               | 2.049232  | -0.777913 |   |
| 19            | 6             | 0           | 0.144380                | -0.414786 | 2.782542  |   |
| 20            | 7             | 0           | 0.079951                | -1.058798 | 3.731651  |   |
| 21            | 8             | 0           | 5.056844                | -0.280365 | -1.329262 |   |
| 22            | 8             | 0           | -4.297286               | -0.098751 | -1.768211 |   |
| 23            | 6             | 0           | 5.423634                | 0.637776  | -2.335960 |   |
| 24            | 1             | 0           | 5.553891                | 1.644226  | -1.925679 |   |
| 25            | 1             | 0           | 6.371748                | 0.285220  | -2.735624 |   |
| 26            | 1             | 0           | 4.678987                | 0.665448  | -3.137893 |   |
| 27            | 6             | 0           | -4.680517               | -1.353555 | -2.291252 |   |
| 28            | 1             | 0           | -5.569787               | -1.170256 | -2.889669 |   |
| 29            | 1             | 0           | -3.894780               | -1.773012 | -2.926977 |   |
| 30            | 1             | 0           | -4.920687               | -2.058737 | -1.489780 |   |
| 31            | 6             | 0           | 0.234964                | 0.438027  | 1.588523  |   |

|    |   |   |           |           |           |
|----|---|---|-----------|-----------|-----------|
| 32 | 1 | 0 | 0.221652  | 1.465200  | 1.960252  |
| 33 | 8 | 0 | -0.504796 | -1.988649 | 0.559831  |
| 34 | 6 | 0 | -0.808300 | -3.305102 | 0.147160  |
| 35 | 1 | 0 | -1.790908 | -3.614391 | 0.514805  |
| 36 | 1 | 0 | -0.772977 | -3.393442 | -0.942725 |
| 37 | 1 | 0 | -0.041482 | -3.938223 | 0.586956  |
| 38 | 8 | 0 | -1.383044 | 2.570128  | 0.843652  |
| 39 | 6 | 0 | -2.184614 | 3.702130  | 0.565778  |
| 40 | 1 | 0 | -1.714100 | 4.535580  | 1.082041  |
| 41 | 1 | 0 | -2.216136 | 3.907583  | -0.507978 |
| 42 | 1 | 0 | -3.201418 | 3.563775  | 0.943406  |

1.1.16. **DAAN-diOMe/diOMe** of S<sub>0</sub> state optimized with UM06-2X/6-311+G(d,p)

| Center<br>Number | Atomic<br>Number | Atomic<br>Type | Coordinates (Angstroms) |           |           |
|------------------|------------------|----------------|-------------------------|-----------|-----------|
|                  |                  |                | X                       | Y         | Z         |
| 1                | 6                | 0              | -2.114910               | 1.890988  | -0.066834 |
| 2                | 6                | 0              | -1.033087               | 1.008408  | -0.130820 |
| 3                | 6                | 0              | -1.208305               | -0.353816 | -0.268254 |
| 4                | 6                | 0              | -2.523355               | -0.849630 | -0.361452 |
| 5                | 6                | 0              | -3.612710               | 0.003221  | -0.294524 |
| 6                | 6                | 0              | -3.403522               | 1.378485  | -0.143243 |
| 7                | 1                | 0              | -1.931537               | 2.950138  | 0.042235  |
| 8                | 1                | 0              | -0.028537               | 1.409025  | -0.071322 |
| 9                | 1                | 0              | -4.632043               | -0.350523 | -0.359996 |
| 10               | 6                | 0              | 1.317435                | -0.738674 | -0.519736 |
| 11               | 6                | 0              | 1.973660                | -0.122845 | 0.551750  |
| 12               | 6                | 0              | 1.966275                | -0.776831 | -1.749706 |
| 13               | 6                | 0              | 3.251597                | 0.420456  | 0.399803  |
| 14               | 6                | 0              | 3.228487                | -0.235048 | -1.930530 |
| 15               | 1                | 0              | 1.468726                | -1.251739 | -2.588604 |
| 16               | 6                | 0              | 3.873878                | 0.359745  | -0.848520 |
| 17               | 1                | 0              | 3.743523                | 0.884129  | 1.241164  |
| 18               | 1                | 0              | 3.733642                | -0.270684 | -2.886475 |
| 19               | 6                | 0              | -0.089761               | -2.285383 | 0.792206  |
| 20               | 7                | 0              | -0.109512               | -3.035780 | 1.661670  |
| 21               | 8                | 0              | -4.534282               | 2.128498  | -0.087973 |
| 22               | 8                | 0              | 5.111144                | 0.859547  | -1.093504 |
| 23               | 6                | 0              | -4.386591               | 3.524356  | 0.066568  |
| 24               | 1                | 0              | -3.838903               | 3.958914  | -0.775303 |
| 25               | 1                | 0              | -5.394128               | 3.932944  | 0.093147  |
| 26               | 1                | 0              | -3.870307               | 3.765169  | 1.000869  |
| 27               | 6                | 0              | 5.813911                | 1.455111  | -0.023725 |
| 28               | 1                | 0              | 6.770617                | 1.772242  | -0.431943 |
| 29               | 1                | 0              | 5.278850                | 2.327308  | 0.364993  |
| 30               | 1                | 0              | 5.984226                | 0.738245  | 0.785528  |
| 31               | 6                | 0              | -0.058036               | -1.352509 | -0.353121 |
| 32               | 1                | 0              | -0.243165               | -1.984171 | -1.228225 |
| 33               | 8                | 0              | 1.281993                | -0.076821 | 1.713653  |
| 34               | 6                | 0              | 1.953211                | 0.312792  | 2.894174  |
| 35               | 1                | 0              | 2.841312                | -0.303949 | 3.059152  |
| 36               | 1                | 0              | 2.236261                | 1.369578  | 2.858384  |
| 37               | 1                | 0              | 1.245520                | 0.154511  | 3.704161  |
| 38               | 8                | 0              | -2.623740               | -2.190428 | -0.531128 |
| 39               | 6                | 0              | -3.911826               | -2.772571 | -0.505557 |
| 40               | 1                | 0              | -3.757372               | -3.845437 | -0.589947 |
| 41               | 1                | 0              | -4.420149               | -2.548237 | 0.436277  |
| 42               | 1                | 0              | -4.518981               | -2.420915 | -1.345059 |

1.1.17. **DAAN-diOMe/triOMe** of S<sub>0</sub> state optimized with UM06-2X/6-311+G(d,p)

| Center<br>Number | Atomic<br>Number | Atomic<br>Type | Coordinates (Angstroms) |           |           |
|------------------|------------------|----------------|-------------------------|-----------|-----------|
|                  |                  |                | X                       | Y         | Z         |
| 1                | 6                | 0              | 2.337740                | -1.777417 | -0.789308 |
| 2                | 6                | 0              | 1.225732                | -1.029918 | -0.390128 |
| 3                | 6                | 0              | 1.344763                | 0.256349  | 0.095079  |
| 4                | 6                | 0              | 2.632731                | 0.821239  | 0.173317  |
| 5                | 6                | 0              | 3.751404                | 0.099921  | -0.210440 |
| 6                | 6                | 0              | 3.599109                | -1.205501 | -0.690781 |
| 7                | 1                | 0              | 2.197706                | -2.781792 | -1.162148 |
| 8                | 1                | 0              | 0.241515                | -1.476242 | -0.464844 |
| 9                | 1                | 0              | 4.751316                | 0.507339  | -0.158691 |
| 10               | 6                | 0              | -1.199088               | 0.558476  | 0.151010  |
| 11               | 6                | 0              | -1.792543               | -0.485439 | 0.858296  |
| 12               | 6                | 0              | -1.902398               | 1.098195  | -0.936104 |
| 13               | 6                | 0              | -3.065635               | -0.970963 | 0.536770  |
| 14               | 6                | 0              | -3.163675               | 0.631044  | -1.285337 |
| 15               | 6                | 0              | -3.737248               | -0.397443 | -0.538191 |
| 16               | 1                | 0              | -3.502197               | -1.775502 | 1.106884  |
| 17               | 1                | 0              | -3.728899               | 1.033971  | -2.112431 |
| 18               | 6                | 0              | 0.227899                | 1.406536  | 1.976327  |
| 19               | 7                | 0              | 0.281315                | 1.674928  | 3.092131  |
| 20               | 8                | 0              | 4.755905                | -1.827314 | -1.040229 |
| 21               | 8                | 0              | -4.972352               | -0.785052 | -0.944710 |
| 22               | 6                | 0              | 4.665566                | -3.149908 | -1.525433 |
| 23               | 1                | 0              | 4.071548                | -3.194175 | -2.443542 |
| 24               | 1                | 0              | 5.685024                | -3.463723 | -1.737961 |
| 25               | 1                | 0              | 4.227512                | -3.816104 | -0.775834 |
| 26               | 6                | 0              | -5.615670               | -1.815341 | -0.224246 |
| 27               | 1                | 0              | -6.581767               | -1.958215 | -0.702574 |
| 28               | 1                | 0              | -5.044741               | -2.747702 | -0.273118 |
| 29               | 1                | 0              | -5.765921               | -1.531120 | 0.821679  |
| 30               | 6                | 0              | 0.158201                | 1.109997  | 0.531426  |

|    |   |   |           |           |           |
|----|---|---|-----------|-----------|-----------|
| 31 | 1 | 0 | 0.263610  | 2.081344  | 0.041410  |
| 32 | 8 | 0 | -1.039952 | -1.005920 | 1.854008  |
| 33 | 6 | 0 | -1.648265 | -1.867570 | 2.794489  |
| 34 | 1 | 0 | -2.531824 | -1.399508 | 3.237282  |
| 35 | 1 | 0 | -1.923082 | -2.822799 | 2.336434  |
| 36 | 1 | 0 | -0.901635 | -2.037229 | 3.566420  |
| 37 | 8 | 0 | -1.273300 | 2.095469  | -1.605879 |
| 38 | 6 | 0 | -1.945015 | 2.695519  | -2.695680 |
| 39 | 1 | 0 | -1.273980 | 3.463104  | -3.073680 |
| 40 | 1 | 0 | -2.144922 | 1.964205  | -3.483889 |
| 41 | 1 | 0 | -2.883559 | 3.155302  | -2.373401 |
| 42 | 8 | 0 | 2.677844  | 2.095056  | 0.633290  |
| 43 | 6 | 0 | 3.944821  | 2.681668  | 0.850974  |
| 44 | 1 | 0 | 4.495943  | 2.788285  | -0.088293 |
| 45 | 1 | 0 | 3.751317  | 3.664129  | 1.274646  |
| 46 | 1 | 0 | 4.532116  | 2.087381  | 1.556651  |

1.1.18. **DAAN-triOMe/triOMe** of S<sub>0</sub> state optimized with UM06-2X/6-311+G(d,p)

| Center<br>Number | Atomic<br>Number | Atomic<br>Type | Coordinates (Angstroms) |           |           |
|------------------|------------------|----------------|-------------------------|-----------|-----------|
|                  |                  |                | X                       | Y         | Z         |
| 1                | 6                | 0              | 2.517346                | -1.378616 | -0.974449 |
| 2                | 6                | 0              | 1.398158                | -1.147365 | -0.166040 |
| 3                | 6                | 0              | 1.289805                | -0.019484 | 0.642823  |
| 4                | 6                | 0              | 2.358747                | 0.886632  | 0.656886  |
| 5                | 6                | 0              | 3.482172                | 0.686657  | -0.138620 |
| 6                | 6                | 0              | 3.548144                | -0.444747 | -0.950094 |
| 7                | 1                | 0              | 2.573739                | -2.259487 | -1.593757 |
| 8                | 1                | 0              | 4.320371                | 1.367262  | -0.149842 |
| 9                | 6                | 0              | -1.224625               | 0.342702  | 0.646363  |
| 10               | 6                | 0              | -2.254176               | -0.595252 | 0.571233  |
| 11               | 6                | 0              | -1.352297               | 1.507046  | -0.128737 |
| 12               | 6                | 0              | -3.378245               | -0.387570 | -0.242835 |
| 13               | 6                | 0              | -2.448308               | 1.734060  | -0.950437 |
| 14               | 6                | 0              | -3.458303               | 0.775738  | -0.998119 |
| 15               | 1                | 0              | -4.160087               | -1.128897 | -0.281278 |
| 16               | 1                | 0              | -2.556871               | 2.625322  | -1.550412 |
| 17               | 6                | 0              | -0.009823               | -0.737649 | 2.599553  |
| 18               | 7                | 0              | 0.041950                | -1.421542 | 3.521313  |
| 19               | 8                | 0              | 4.681173                | -0.557588 | -1.691419 |
| 20               | 8                | 0              | -4.498884               | 1.069793  | -1.821447 |
| 21               | 6                | 0              | 4.818183                | -1.689248 | -2.523611 |
| 22               | 1                | 0              | 4.025239                | -1.724554 | -3.277206 |
| 23               | 1                | 0              | 5.781353                | -1.584538 | -3.017812 |
| 24               | 1                | 0              | 4.808790                | -2.613984 | -1.938382 |
| 25               | 6                | 0              | -5.558895               | 0.142080  | -1.905941 |
| 26               | 1                | 0              | -6.276382               | 0.567500  | -2.603925 |
| 27               | 1                | 0              | -5.210811               | -0.823399 | -2.286406 |
| 28               | 1                | 0              | -6.039090               | 0.000005  | -0.932760 |
| 29               | 6                | 0              | 0.042577                | 0.221053  | 1.483606  |
| 30               | 1                | 0              | 0.190796                | 1.193146  | 1.960589  |
| 31               | 8                | 0              | -2.112920               | -1.711436 | 1.317559  |
| 32               | 6                | 0              | -3.198797               | -2.599680 | 1.449964  |
| 33               | 1                | 0              | -4.090659               | -2.084517 | 1.819788  |
| 34               | 1                | 0              | -3.429154               | -3.093886 | 0.500004  |
| 35               | 1                | 0              | -2.881901               | -3.343711 | 2.177634  |
| 36               | 8                | 0              | -0.327995               | 2.387047  | -0.004647 |
| 37               | 6                | 0              | -0.359918               | 3.569694  | -0.773776 |
| 38               | 1                | 0              | 0.552834                | 4.108411  | -0.527801 |
| 39               | 1                | 0              | -0.374039               | 3.342671  | -1.843793 |
| 40               | 1                | 0              | -1.227648               | 4.184994  | -0.517869 |
| 41               | 8                | 0              | 2.230953                | 1.945922  | 1.493468  |
| 42               | 6                | 0              | 3.290079                | 2.877110  | 1.557964  |
| 43               | 1                | 0              | 3.458104                | 3.351660  | 0.586220  |
| 44               | 1                | 0              | 2.984078                | 3.628583  | 2.282360  |
| 45               | 1                | 0              | 4.215036                | 2.400564  | 1.895498  |
| 46               | 8                | 0              | 0.345873                | -1.993009 | -0.103742 |
| 47               | 6                | 0              | 0.390295                | -3.199794 | -0.829966 |
| 48               | 1                | 0              | 0.438109                | -3.013532 | -1.907577 |
| 49               | 1                | 0              | 1.241605                | -3.814792 | -0.522683 |
| 50               | 1                | 0              | -0.535378               | -3.720069 | -0.592552 |

1.1.19. **DAAN-OMe/diOMe-m** of S<sub>0</sub> state optimized with UM06-2X/6-311+G(d,p)

| Center<br>Number | Atomic<br>Number | Atomic<br>Type | Coordinates (Angstroms) |           |           |
|------------------|------------------|----------------|-------------------------|-----------|-----------|
|                  |                  |                | X                       | Y         | Z         |
| 1                | 6                | 0              | 2.966874                | -0.564463 | 0.990926  |
| 2                | 6                | 0              | 1.786323                | 0.040792  | 0.569641  |
| 3                | 6                | 0              | 1.700468                | 0.658623  | -0.670826 |
| 4                | 6                | 0              | 2.823080                | 0.663261  | -1.499183 |
| 5                | 6                | 0              | 4.003498                | 0.061884  | -1.097717 |
| 6                | 6                | 0              | 4.082363                | -0.554379 | 0.152808  |
| 7                | 1                | 0              | 3.000632                | -1.037798 | 1.962599  |
| 8                | 1                | 0              | 0.917089                | 0.019922  | 1.218698  |
| 9                | 1                | 0              | 2.774392                | 1.145088  | -2.470301 |
| 10               | 1                | 0              | 4.880133                | 0.054900  | -1.733286 |
| 11               | 6                | 0              | -0.841296               | 0.540015  | -0.785575 |
| 12               | 6                | 0              | -1.812551               | 1.004405  | 0.106851  |
| 13               | 6                | 0              | -0.998733               | -0.700149 | -1.378617 |
| 14               | 6                | 0              | -2.930534               | 0.234149  | 0.399291  |
| 15               | 1                | 0              | -1.690616               | 1.976547  | 0.566457  |
| 16               | 6                | 0              | -2.118896               | -1.482361 | -1.093241 |
| 17               | 1                | 0              | -0.242707               | -1.076499 | -2.059108 |

|    |   |   |           |           |           |
|----|---|---|-----------|-----------|-----------|
| 18 | 6 | 0 | -3.088086 | -1.030031 | -0.208950 |
| 19 | 1 | 0 | -2.223489 | -2.447695 | -1.569461 |
| 20 | 6 | 0 | 0.355275  | 2.699506  | -0.542507 |
| 21 | 7 | 0 | 0.309152  | 3.751010  | -0.081210 |
| 22 | 8 | 0 | 5.276786  | -1.118023 | 0.461804  |
| 23 | 8 | 0 | -4.206055 | -1.710217 | 0.133403  |
| 24 | 6 | 0 | 5.405969  | -1.738618 | 1.724318  |
| 25 | 1 | 0 | 4.708023  | -2.575318 | 1.826549  |
| 26 | 1 | 0 | 6.426489  | -2.110808 | 1.773603  |
| 27 | 1 | 0 | 5.239704  | -1.022522 | 2.534868  |
| 28 | 6 | 0 | -4.405024 | -2.975594 | -0.458858 |
| 29 | 1 | 0 | -5.345928 | -3.347997 | -0.060759 |
| 30 | 1 | 0 | -4.476139 | -2.895942 | -1.548299 |
| 31 | 1 | 0 | -3.598401 | -3.667312 | -0.195670 |
| 32 | 6 | 0 | 0.411598  | 1.346176  | -1.114043 |
| 33 | 1 | 0 | 0.457192  | 1.478927  | -2.200047 |
| 34 | 8 | 0 | -3.916860 | 0.603958  | 1.245375  |
| 35 | 6 | 0 | -3.810473 | 1.872913  | 1.859029  |
| 36 | 1 | 0 | -4.696450 | 1.978297  | 2.480387  |
| 37 | 1 | 0 | -2.915111 | 1.936090  | 2.485032  |
| 38 | 1 | 0 | -3.788974 | 2.672519  | 1.112481  |

1.1.20. **DAAN-diOMe-m/diOMe-m** of  $S_0$  state optimized with UM06-2X/6-311+G(d,p)

| Center Number | Atomic Number | Atomic Type | Coordinates (Angstroms) |           |           | Z |
|---------------|---------------|-------------|-------------------------|-----------|-----------|---|
|               |               |             | X                       | Y         |           |   |
| 1             | 6             | 0           | 2.098341                | -1.779623 | -0.303857 |   |
| 2             | 6             | 0           | 1.018950                | -0.950325 | -0.628050 |   |
| 3             | 6             | 0           | 1.181363                | 0.421428  | -0.664103 |   |
| 4             | 6             | 0           | 2.434848                | 0.973906  | -0.364961 |   |
| 5             | 6             | 0           | 3.508472                | 0.161791  | -0.037751 |   |
| 6             | 6             | 0           | 3.340212                | -1.242109 | -0.008790 |   |
| 7             | 1             | 0           | 1.947998                | -2.850314 | -0.279022 |   |
| 8             | 1             | 0           | 0.054827                | -1.393795 | -0.844385 |   |
| 9             | 1             | 0           | 2.556656                | 2.049413  | -0.377453 |   |
| 10            | 6             | 0           | -1.347732               | 0.743230  | -0.813822 |   |
| 11            | 6             | 0           | -1.793195               | 0.634798  | 0.511294  |   |
| 12            | 6             | 0           | -2.136295               | 0.269988  | -1.841021 |   |
| 13            | 6             | 0           | -3.018187               | 0.059979  | 0.797673  |   |
| 14            | 1             | 0           | -1.163170               | 1.011501  | 1.307794  |   |
| 15            | 6             | 0           | -3.376945               | -0.320174 | -1.564590 |   |
| 16            | 1             | 0           | -1.800653               | 0.347819  | -2.868894 |   |
| 17            | 6             | 0           | -3.825182               | -0.430596 | -0.259896 |   |
| 18            | 1             | 0           | -3.982395               | -0.684773 | -2.382960 |   |
| 19            | 6             | 0           | 0.144824                | 2.657470  | -0.472548 |   |
| 20            | 7             | 0           | 0.251211                | 3.689094  | 0.022269  |   |
| 21            | 8             | 0           | 4.439699                | -1.956207 | 0.322898  |   |
| 22            | 8             | 0           | -5.002926               | -0.977247 | 0.114481  |   |
| 23            | 6             | 0           | 4.311392                | -3.360766 | 0.371998  |   |
| 24            | 1             | 0           | 4.028104                | -3.766556 | -0.604413 |   |
| 25            | 1             | 0           | 5.290513                | -3.741475 | 0.652759  |   |
| 26            | 1             | 0           | 3.573010                | -3.664409 | 1.120931  |   |
| 27            | 6             | 0           | -5.846710               | -1.465936 | -0.906076 |   |
| 28            | 1             | 0           | -6.729821               | -1.854091 | -0.404343 |   |
| 29            | 1             | 0           | -6.139012               | -0.665927 | -1.593542 |   |
| 30            | 1             | 0           | -5.362301               | -2.271071 | -1.467707 |   |
| 31            | 6             | 0           | 0.024346                | 1.330071  | -1.095733 |   |
| 32            | 1             | 0           | 0.104477                | 1.496135  | -2.175946 |   |
| 33            | 8             | 0           | -3.535045               | -0.081641 | 2.036641  |   |
| 34            | 6             | 0           | -2.772961               | 0.412780  | 3.119591  |   |
| 35            | 1             | 0           | -3.361271               | 0.216134  | 4.012514  |   |
| 36            | 1             | 0           | -1.811331               | -0.104444 | 3.193446  |   |
| 37            | 1             | 0           | -2.602353               | 1.489158  | 3.021956  |   |
| 38            | 8             | 0           | 4.744872                | 0.608295  | 0.274682  |   |
| 39            | 6             | 0           | 4.952853                | 2.005948  | 0.276833  |   |
| 40            | 1             | 0           | 4.301752                | 2.501615  | 1.003323  |   |
| 41            | 1             | 0           | 5.992477                | 2.152257  | 0.559637  |   |
| 42            | 1             | 0           | 4.780851                | 2.432404  | -0.716329 |   |

1.2. **DAAN** radical geometries of  $D_0$  state optimized with UM06-2X/6-311+G(d,p)

1.2.1. **DAAN-H/H** radical of  $D_0$  state optimized with UM06-2X/6-311+G(d,p)

| Center Number | Atomic Number | Atomic Type | Coordinates (Angstroms) |           |           | Z |
|---------------|---------------|-------------|-------------------------|-----------|-----------|---|
|               |               |             | X                       | Y         |           |   |
| 1             | 6             | 0           | 3.676921                | 0.175851  | 0.419494  |   |
| 2             | 6             | 0           | 2.439452                | 0.797376  | 0.453944  |   |
| 3             | 6             | 0           | 1.291042                | 0.139456  | -0.025969 |   |
| 4             | 6             | 0           | 1.438988                | -1.148973 | -0.573739 |   |
| 5             | 6             | 0           | 2.682256                | -1.760832 | -0.610914 |   |
| 6             | 6             | 0           | 3.804614                | -1.107705 | -0.107075 |   |
| 7             | 1             | 0           | 4.546912                | 0.694265  | 0.803932  |   |
| 8             | 1             | 0           | 2.345895                | 1.797320  | 0.862358  |   |
| 9             | 1             | 0           | 0.580683                | -1.648370 | -1.005384 |   |
| 10            | 1             | 0           | 2.779430                | -2.747338 | -1.048087 |   |
| 11            | 6             | 0           | 0.000006                | 0.807375  | 0.000014  |   |
| 12            | 6             | 0           | -1.291040               | 0.139460  | 0.025977  |   |
| 13            | 6             | 0           | -2.439424               | 0.797357  | -0.454021 |   |
| 14            | 6             | 0           | -1.439012               | -1.148938 | 0.573811  |   |
| 15            | 6             | 0           | -3.676897               | 0.175839  | -0.419593 |   |
| 16            | 1             | 0           | -2.345844               | 1.797279  | -0.862484 |   |
| 17            | 6             | 0           | -2.682284               | -1.760791 | 0.610966  |   |
| 18            | 1             | 0           | -0.580724               | -1.648311 | 1.005518  |   |

|    |   |   |           |           |           |
|----|---|---|-----------|-----------|-----------|
| 19 | 6 | 0 | -3.804617 | -1.107688 | 0.107041  |
| 20 | 1 | 0 | -4.546870 | 0.694233  | -0.804099 |
| 21 | 1 | 0 | -2.779480 | -2.747272 | 1.048191  |
| 22 | 6 | 0 | 0.000002  | 2.223606  | 0.000030  |
| 23 | 7 | 0 | -0.000005 | 3.380040  | 0.000044  |
| 24 | 1 | 0 | 4.773974  | -1.590234 | -0.136392 |
| 25 | 1 | 0 | -4.773980 | -1.590212 | 0.136342  |

1.2.2. **DAAN-H/Me** radical of  $D_0$  state optimized with UM06-2X/6-311+G(d,p)

| Center Number | Atomic Number | Atomic Type | Coordinates (Angstroms) |           |           | Z |
|---------------|---------------|-------------|-------------------------|-----------|-----------|---|
|               |               |             | X                       | Y         |           |   |
| 1             | 6             | 0           | 4.074625                | -0.168957 | -0.449002 |   |
| 2             | 6             | 0           | 4.059649                | -1.453560 | 0.089996  |   |
| 3             | 6             | 0           | 2.875774                | -1.966541 | 0.614608  |   |
| 4             | 6             | 0           | 1.711717                | -1.214198 | 0.586255  |   |
| 5             | 6             | 0           | 1.706942                | 0.077165  | 0.026206  |   |
| 6             | 6             | 0           | 2.917194                | 0.591866  | -0.475164 |   |
| 7             | 1             | 0           | 4.993734                | 0.241147  | -0.849706 |   |
| 8             | 1             | 0           | 2.863469                | -2.953444 | 1.061526  |   |
| 9             | 1             | 0           | 0.807045                | -1.605630 | 1.034353  |   |
| 10            | 1             | 0           | 2.934907                | 1.591990  | -0.893399 |   |
| 11            | 6             | 0           | 0.501188                | 0.891376  | 0.008101  |   |
| 12            | 6             | 0           | -0.856599               | 0.380961  | -0.010229 |   |
| 13            | 6             | 0           | -1.162525               | -0.890554 | -0.531084 |   |
| 14            | 6             | 0           | -1.924786               | 1.177776  | 0.446316  |   |
| 15            | 6             | 0           | -2.469954               | -1.346828 | -0.561776 |   |
| 16            | 1             | 0           | -0.373361               | -1.500741 | -0.952261 |   |
| 17            | 6             | 0           | -3.224665               | 0.706639  | 0.415962  |   |
| 18            | 1             | 0           | -1.719264               | 2.170185  | 0.831793  |   |
| 19            | 6             | 0           | -3.523737               | -0.566592 | -0.079339 |   |
| 20            | 1             | 0           | -2.681582               | -2.323495 | -0.983942 |   |
| 21            | 1             | 0           | -4.028014               | 1.337543  | 0.781370  |   |
| 22            | 6             | 0           | 0.669258                | 2.297886  | 0.006732  |   |
| 23            | 7             | 0           | 0.806591                | 3.446214  | 0.005607  |   |
| 24            | 1             | 0           | 4.966630                | -2.045363 | 0.112878  |   |
| 25            | 6             | 0           | -4.937182               | -1.081087 | -0.080999 |   |
| 26            | 1             | 0           | -5.074951               | -1.855555 | -0.836550 |   |
| 27            | 1             | 0           | -5.187614               | -1.515253 | 0.891322  |   |
| 28            | 1             | 0           | -5.648529               | -0.276991 | -0.276131 |   |

1.2.3. **DAAN-H/OMe** radical of  $D_0$  state optimized with UM06-2X/6-311+G(d,p)

| Center Number | Atomic Number | Atomic Type | Coordinates (Angstroms) |           |           | Z |
|---------------|---------------|-------------|-------------------------|-----------|-----------|---|
|               |               |             | X                       | Y         |           |   |
| 1             | 6             | 0           | -4.466477               | -0.185867 | -0.431370 |   |
| 2             | 6             | 0           | -3.312394               | 0.580077  | -0.468714 |   |
| 3             | 6             | 0           | -2.098001               | 0.075563  | 0.031700  |   |
| 4             | 6             | 0           | -2.094811               | -1.210712 | 0.602176  |   |
| 5             | 6             | 0           | -3.255144               | -1.968914 | 0.641087  |   |
| 6             | 6             | 0           | -4.443618               | -1.466098 | 0.117430  |   |
| 7             | 1             | 0           | -5.389132               | 0.217081  | -0.831348 |   |
| 8             | 1             | 0           | -3.336495               | 1.576819  | -0.894737 |   |
| 9             | 1             | 0           | -1.186980               | -1.594163 | 1.051137  |   |
| 10            | 1             | 0           | -3.235889               | -2.952158 | 1.095886  |   |
| 11            | 6             | 0           | -0.894869               | 0.896139  | 0.002440  |   |
| 12            | 6             | 0           | 0.461071                | 0.393169  | -0.036668 |   |
| 13            | 6             | 0           | 1.534905                | 1.196951  | 0.384299  |   |
| 14            | 6             | 0           | 0.767680                | -0.889663 | -0.545739 |   |
| 15            | 6             | 0           | 2.844747                | 0.745297  | 0.342196  |   |
| 16            | 1             | 0           | 1.333554                | 2.193086  | 0.762074  |   |
| 17            | 6             | 0           | 2.066443                | -1.343384 | -0.597100 |   |
| 18            | 1             | 0           | -0.025631               | -1.512034 | -0.939927 |   |
| 19            | 6             | 0           | 3.118324                | -0.535628 | -0.143916 |   |
| 20            | 1             | 0           | 3.637720                | 1.394218  | 0.687691  |   |
| 21            | 1             | 0           | 2.306085                | -2.318766 | -1.001920 |   |
| 22            | 6             | 0           | -1.070539               | 2.301534  | 0.015375  |   |
| 23            | 7             | 0           | -1.210650               | 3.449675  | 0.026548  |   |
| 24            | 8             | 0           | 4.354139                | -1.073462 | -0.228270 |   |
| 25            | 6             | 0           | 5.451520                | -0.287863 | 0.196834  |   |
| 26            | 1             | 0           | 6.336112                | -0.900753 | 0.042986  |   |
| 27            | 1             | 0           | 5.532639                | 0.627068  | -0.397124 |   |
| 28            | 1             | 0           | 5.364100                | -0.032052 | 1.256780  |   |
| 29            | 1             | 0           | -5.347683               | -2.061975 | 0.148643  |   |

1.2.4. **DAAN-Me/OMe** radical of  $D_0$  state optimized with UM06-2X/6-311+G(d,p)

| Center Number | Atomic Number | Atomic Type | Coordinates (Angstroms) |           |           | Z |
|---------------|---------------|-------------|-------------------------|-----------|-----------|---|
|               |               |             | X                       | Y         |           |   |
| 1             | 6             | 0           | -4.075635               | 0.366265  | -0.427975 |   |
| 2             | 6             | 0           | -2.856692               | 1.020086  | -0.460589 |   |
| 3             | 6             | 0           | -1.689017               | 0.395318  | 0.016204  |   |
| 4             | 6             | 0           | -1.812215               | -0.896238 | 0.559702  |   |
| 5             | 6             | 0           | -3.040219               | -1.537569 | 0.591562  |   |
| 6             | 6             | 0           | -4.191706               | -0.927563 | 0.089001  |   |
| 7             | 1             | 0           | -4.958797               | 0.868126  | -0.809098 |   |
| 8             | 1             | 0           | -2.793708               | 2.024993  | -0.863131 |   |
| 9             | 1             | 0           | -0.946731               | -1.377137 | 0.998601  |   |
| 10            | 1             | 0           | -3.111179               | -2.526861 | 1.031271  |   |
| 11            | 6             | 0           | -0.415923               | 1.097086  | -0.005327 |   |

|    |   |   |           |           |           |
|----|---|---|-----------|-----------|-----------|
| 12 | 6 | 0 | 0.887781  | 0.467665  | -0.041253 |
| 13 | 6 | 0 | 2.029079  | 1.158976  | 0.399193  |
| 14 | 6 | 0 | 1.075092  | -0.831187 | -0.566152 |
| 15 | 6 | 0 | 3.290647  | 0.584787  | 0.360148  |
| 16 | 1 | 0 | 1.920331  | 2.164849  | 0.789039  |
| 17 | 6 | 0 | 2.325121  | -1.406548 | -0.614177 |
| 18 | 1 | 0 | 0.229347  | -1.369003 | -0.975578 |
| 19 | 6 | 0 | 3.445109  | -0.709547 | -0.141642 |
| 20 | 1 | 0 | 4.138660  | 1.150753  | 0.720447  |
| 21 | 1 | 0 | 2.474407  | -2.394784 | -1.031106 |
| 22 | 6 | 0 | -0.455571 | 2.512913  | 0.011983  |
| 23 | 7 | 0 | -0.484691 | 3.669210  | 0.026727  |
| 24 | 8 | 0 | 4.625068  | -1.362512 | -0.224473 |
| 25 | 6 | 0 | 5.788235  | -0.691654 | 0.220820  |
| 26 | 1 | 0 | 6.611676  | -1.384225 | 0.065407  |
| 27 | 1 | 0 | 5.962300  | 0.219352  | -0.359107 |
| 28 | 1 | 0 | 5.715716  | -0.442900 | 1.283606  |
| 29 | 6 | 0 | -5.516042 | -1.641567 | 0.092057  |
| 30 | 1 | 0 | -5.692183 | -2.127385 | -0.872068 |
| 31 | 1 | 0 | -5.547663 | -2.412163 | 0.863411  |
| 32 | 1 | 0 | -6.338146 | -0.945332 | 0.265656  |

1.2.5. **DAAN-OMe/OMe** radical of D<sub>0</sub> state optimized with UM06-2X/6-311+G(d,p)

| Center Number | Atomic Number | Atomic Type | Coordinates (Angstroms) |           |           |
|---------------|---------------|-------------|-------------------------|-----------|-----------|
|               |               |             | X                       | Y         | Z         |
| 1             | 6             | 0           | 3.693211                | 0.529737  | 0.355087  |
| 2             | 6             | 0           | 2.447702                | 1.138675  | 0.400458  |
| 3             | 6             | 0           | 1.287665                | 0.482810  | -0.042500 |
| 4             | 6             | 0           | 1.437852                | -0.816211 | -0.576856 |
| 5             | 6             | 0           | 2.671445                | -1.426678 | -0.630489 |
| 6             | 6             | 0           | 3.810903                | -0.764754 | -0.155317 |
| 7             | 1             | 0           | 4.557129                | 1.069738  | 0.717483  |
| 8             | 1             | 0           | 2.367547                | 2.144623  | 0.797123  |
| 9             | 1             | 0           | 0.577073                | -1.327008 | -0.989953 |
| 10            | 1             | 0           | 2.792085                | -2.415878 | -1.054417 |
| 11            | 6             | 0           | -1.287679               | 0.482818  | -0.042532 |
| 12            | 6             | 0           | -2.447703               | 1.138667  | -0.400478 |
| 13            | 6             | 0           | -1.437881               | -0.816174 | 0.576952  |
| 14            | 6             | 0           | -3.693216               | 0.529737  | -0.355100 |
| 15            | 1             | 0           | -2.367536               | 2.144596  | -0.797190 |
| 16            | 6             | 0           | -2.671478               | -1.426632 | 0.630594  |
| 17            | 1             | 0           | -0.577111               | -1.326952 | 0.990091  |
| 18            | 6             | 0           | -3.810923               | -0.764727 | 0.155367  |
| 19            | 1             | 0           | -4.557125               | 1.069724  | -0.717540 |
| 20            | 1             | 0           | -2.792131               | -2.415809 | 1.054571  |
| 21            | 6             | 0           | -0.000006               | 2.564734  | -0.000001 |
| 22            | 7             | 0           | 0.000161                | 3.721664  | -0.000376 |
| 23            | 8             | 0           | 4.972691                | -1.450357 | -0.244186 |
| 24            | 8             | 0           | -4.972716               | -1.450321 | 0.244246  |
| 25            | 6             | 0           | 6.153754                | -0.815106 | 0.205107  |
| 26            | 1             | 0           | 6.088602                | -0.571628 | 1.269665  |
| 27            | 1             | 0           | 6.957935                | -1.528906 | 0.044663  |
| 28            | 1             | 0           | 6.353008                | 0.094892  | -0.368392 |
| 29            | 6             | 0           | -6.153774               | -0.815071 | -0.205062 |
| 30            | 1             | 0           | -6.957964               | -1.528851 | -0.044578 |
| 31            | 1             | 0           | -6.353007               | 0.094956  | 0.368399  |
| 32            | 1             | 0           | -6.088631               | -0.571641 | -1.269631 |
| 33            | 6             | 0           | -0.000004               | 1.148497  | 0.000013  |

1.2.6. **DAAN-SMe/OMe** radical of D<sub>0</sub> state optimized with UM06-2X/6-311+G(d,p)

| Center Number | Atomic Number | Atomic Type | Coordinates (Angstroms) |           |           |
|---------------|---------------|-------------|-------------------------|-----------|-----------|
|               |               |             | X                       | Y         | Z         |
| 1             | 6             | 0           | 3.321787                | 0.736276  | 0.334942  |
| 2             | 6             | 0           | 2.059320                | 1.304040  | 0.375036  |
| 3             | 6             | 0           | 0.919214                | 0.593947  | -0.042075 |
| 4             | 6             | 0           | 1.114098                | -0.711472 | -0.542201 |
| 5             | 6             | 0           | 2.371371                | -1.276524 | -0.589135 |
| 6             | 6             | 0           | 3.495471                | -0.566940 | -0.139834 |
| 7             | 1             | 0           | 4.165384                | 1.319292  | 0.679101  |
| 8             | 1             | 0           | 1.946178                | 2.316813  | 0.745608  |
| 9             | 1             | 0           | 0.271693                | -1.265499 | -0.936930 |
| 10            | 1             | 0           | 2.496708                | -2.274749 | -0.993704 |
| 11            | 6             | 0           | -1.654224               | 0.504283  | 0.042719  |
| 12            | 6             | 0           | -2.832716               | 1.111883  | -0.419622 |
| 13            | 6             | 0           | -1.763746               | -0.787395 | 0.604000  |
| 14            | 6             | 0           | -4.057272               | 0.462558  | -0.368630 |
| 15            | 1             | 0           | -2.783958               | 2.111553  | -0.836696 |
| 16            | 6             | 0           | -2.976431               | -1.437612 | 0.663892  |
| 17            | 1             | 0           | -0.889147               | -1.259720 | 1.033534  |
| 18            | 6             | 0           | -4.134467               | -0.824423 | 0.168178  |
| 19            | 1             | 0           | -4.936638               | 0.965390  | -0.746969 |
| 20            | 1             | 0           | -3.066603               | -2.420850 | 1.108678  |
| 21            | 6             | 0           | -0.439552               | 2.628740  | -0.026334 |
| 22            | 7             | 0           | -0.481710               | 3.784565  | -0.043264 |
| 23            | 8             | 0           | -5.272719               | -1.546364 | 0.265262  |
| 24            | 6             | 0           | 6.204540                | -0.153538 | 0.377586  |
| 25            | 1             | 0           | 5.988643                | 0.111899  | 1.412135  |
| 26            | 1             | 0           | 7.187385                | -0.620180 | 0.329797  |
| 27            | 1             | 0           | 6.201806                | 0.733194  | -0.255747 |
| 28            | 6             | 0           | -6.471978               | -0.961376 | -0.204391 |

|    |    |   |           |           |           |
|----|----|---|-----------|-----------|-----------|
| 29 | 1  | 0 | -7.252171 | -1.699071 | -0.034145 |
| 30 | 1  | 0 | -6.706186 | -0.047291 | 0.348966  |
| 31 | 1  | 0 | -6.407731 | -0.737818 | -1.273306 |
| 32 | 6  | 0 | -0.389643 | 1.212900  | -0.007036 |
| 33 | 16 | 0 | 5.046484  | -1.397882 | -0.235134 |

1.2.7. **DAAN-F/F** radical of D<sub>0</sub> state optimized with UM06-2X/6-311+G(d,p)

| Center Number | Atomic Number | Atomic Type | Coordinates (Angstroms) |           |           |
|---------------|---------------|-------------|-------------------------|-----------|-----------|
|               |               |             | X                       | Y         | Z         |
| 1             | 6             | 0           | -3.674839               | 0.416064  | -0.460891 |
| 2             | 6             | 0           | -2.434711               | 1.029809  | -0.478842 |
| 3             | 6             | 0           | -1.289776               | 0.372175  | 0.011594  |
| 4             | 6             | 0           | -1.444172               | -0.917043 | 0.556748  |
| 5             | 6             | 0           | -2.682393               | -1.536659 | 0.583946  |
| 6             | 6             | 0           | -3.775917               | -0.862118 | 0.065217  |
| 7             | 1             | 0           | -4.559193               | 0.907893  | -0.845019 |
| 8             | 1             | 0           | -2.339607               | 2.030258  | -0.884977 |
| 9             | 1             | 0           | -0.592378               | -1.417990 | 0.998859  |
| 10            | 1             | 0           | -2.817038               | -2.521052 | 1.013521  |
| 11            | 6             | 0           | 1.289773                | 0.372172  | -0.011700 |
| 12            | 6             | 0           | 2.434708                | 1.029858  | 0.478668  |
| 13            | 6             | 0           | 1.444173                | -0.917105 | -0.556716 |
| 14            | 6             | 0           | 3.674835                | 0.416113  | 0.460787  |
| 15            | 1             | 0           | 2.339602                | 2.030353  | 0.884692  |
| 16            | 6             | 0           | 2.682394                | -1.536723 | -0.583843 |
| 17            | 1             | 0           | 0.592381                | -1.418099 | -0.998778 |
| 18            | 6             | 0           | 3.775916                | -0.862126 | -0.065182 |
| 19            | 1             | 0           | 4.559188                | 0.907983  | 0.844864  |
| 20            | 1             | 0           | 2.817041                | -2.521162 | -1.013313 |
| 21            | 6             | 0           | 0.000003                | 2.456300  | -0.000172 |
| 22            | 7             | 0           | 0.000007                | 3.612803  | 0.000302  |
| 23            | 6             | 0           | -0.000000               | 1.040748  | -0.000095 |
| 24            | 9             | 0           | -4.973725               | -1.460917 | 0.085880  |
| 25            | 9             | 0           | 4.973725                | -1.460927 | -0.085776 |

1.2.8. **DAAN-F/OMe** radical of D<sub>0</sub> state optimized with UM06-2X/6-311+G(d,p)

| Center Number | Atomic Number | Atomic Type | Coordinates (Angstroms) |           |           |
|---------------|---------------|-------------|-------------------------|-----------|-----------|
|               |               |             | X                       | Y         | Z         |
| 1             | 6             | 0           | 4.102054                | 0.309490  | -0.458296 |
| 2             | 6             | 0           | 2.885349                | 0.969555  | -0.480819 |
| 3             | 6             | 0           | 1.717555                | 0.361507  | 0.016775  |
| 4             | 6             | 0           | 1.823979                | -0.926548 | 0.573690  |
| 5             | 6             | 0           | 3.037982                | -1.593509 | 0.604546  |
| 6             | 6             | 0           | 4.155558                | -0.966552 | 0.078702  |
| 7             | 1             | 0           | 5.003760                | 0.764304  | -0.847791 |
| 8             | 1             | 0           | 2.827907                | 1.969309  | -0.895753 |
| 9             | 1             | 0           | 0.953937                | -1.389999 | 1.021284  |
| 10            | 1             | 0           | 3.134918                | -2.578610 | 1.042720  |
| 11            | 6             | 0           | -0.857696               | 0.464967  | -0.038051 |
| 12            | 6             | 0           | -1.992804               | 1.172386  | 0.394659  |
| 13            | 6             | 0           | -1.058507               | -0.834608 | -0.557567 |
| 14            | 6             | 0           | -3.260355               | 0.613017  | 0.353802  |
| 15            | 1             | 0           | -1.873467               | 2.178644  | 0.780392  |
| 16            | 6             | 0           | -2.314717               | -1.395124 | -0.607495 |
| 17            | 1             | 0           | -0.218681               | -1.384831 | -0.962889 |
| 18            | 6             | 0           | -3.428402               | -0.682201 | -0.142550 |
| 19            | 1             | 0           | -4.103080               | 1.190489  | 0.708130  |
| 20            | 1             | 0           | -2.474440               | -2.383307 | -1.020603 |
| 21            | 6             | 0           | 0.511347                | 2.494025  | 0.023024  |
| 22            | 7             | 0           | 0.560842                | 3.649556  | 0.040525  |
| 23            | 8             | 0           | -4.614473               | -1.321079 | -0.226553 |
| 24            | 6             | 0           | -5.772755               | -0.635169 | 0.210305  |
| 25            | 1             | 0           | -6.602584               | -1.319859 | 0.054528  |
| 26            | 1             | 0           | -5.701928               | -0.382208 | 1.272110  |
| 27            | 1             | 0           | -5.934030               | 0.274427  | -0.375322 |
| 28            | 6             | 0           | 0.451236                | 1.079452  | -0.000017 |
| 29            | 9             | 0           | 5.330959                | -1.611194 | 0.103076  |

1.2.9. **DAAN-Br/OMe** radical of D<sub>0</sub> state optimized with UM06-2X/6-311+G(d,p)

| Center Number | Atomic Number | Atomic Type | Coordinates (Angstroms) |           |           |
|---------------|---------------|-------------|-------------------------|-----------|-----------|
|               |               |             | X                       | Y         | Z         |
| 1             | 6             | 0           | -2.947389               | 1.078056  | -0.474956 |
| 2             | 6             | 0           | -1.650759               | 1.563375  | -0.485317 |
| 3             | 6             | 0           | -0.578737               | 0.789611  | -0.003300 |
| 4             | 6             | 0           | -0.866443               | -0.481797 | 0.526465  |
| 5             | 6             | 0           | -2.162090               | -0.972205 | 0.545594  |
| 6             | 6             | 0           | -3.194399               | -0.192725 | 0.034621  |
| 7             | 1             | 0           | -3.761776               | 1.678279  | -0.859323 |
| 8             | 1             | 0           | -1.456875               | 2.554311  | -0.880056 |
| 9             | 1             | 0           | -0.072597               | -1.073242 | 0.965002  |
| 10            | 1             | 0           | -2.742254               | -1.945757 | 0.968098  |
| 11            | 6             | 0           | 1.985816                | 0.534992  | -0.043043 |
| 12            | 6             | 0           | 3.202005                | 1.073574  | 0.412044  |
| 13            | 6             | 0           | 2.012115                | -0.772116 | -0.581525 |
| 14            | 6             | 0           | 4.380856                | 0.345870  | 0.375459  |
| 15            | 1             | 0           | 3.217338                | 2.081038  | 0.812471  |
| 16            | 6             | 0           | 3.179799                | -1.499253 | -0.627674 |

|    |    |   |           |           |           |
|----|----|---|-----------|-----------|-----------|
| 17 | 1  | 0 | 1.109933  | -1.195290 | -1.004924 |
| 18 | 6  | 0 | 4.375086  | -0.953208 | -0.139533 |
| 19 | 1  | 0 | 5.290599  | 0.796449  | 0.747605  |
| 20 | 1  | 0 | 3.207130  | -2.493711 | -1.055361 |
| 21 | 6  | 0 | 0.910590  | 2.733372  | 0.029044  |
| 22 | 7  | 0 | 1.022575  | 3.884041  | 0.059204  |
| 23 | 8  | 0 | 5.462558  | -1.747675 | -0.221575 |
| 24 | 6  | 0 | 6.698846  | -1.234980 | 0.239057  |
| 25 | 1  | 0 | 7.428055  | -2.025472 | 0.081016  |
| 26 | 1  | 0 | 6.991675  | -0.347859 | -0.329725 |
| 27 | 1  | 0 | 6.649575  | -0.990512 | 1.304023  |
| 28 | 6  | 0 | 0.773832  | 1.323856  | -0.007721 |
| 29 | 35 | 0 | -4.965773 | -0.864676 | 0.051830  |

1.2.10. **DAAN-Ac/OMe** radical of D<sub>0</sub> state optimized with UM06-2X/6-311+G(d,p)

| Center Number | Atomic Number | Atomic Type | Coordinates (Angstroms) |           |           | Z |
|---------------|---------------|-------------|-------------------------|-----------|-----------|---|
|               |               |             | X                       | Y         |           |   |
| 1             | 6             | 0           | -3.385088               | 0.860012  | 0.404167  |   |
| 2             | 6             | 0           | -2.113052               | 1.405518  | 0.415517  |   |
| 3             | 6             | 0           | -1.006112               | 0.659891  | -0.031467 |   |
| 4             | 6             | 0           | -1.234901               | -0.641252 | -0.526271 |   |
| 5             | 6             | 0           | -2.508204               | -1.175993 | -0.539449 |   |
| 6             | 6             | 0           | -3.598301               | -0.439061 | -0.065046 |   |
| 7             | 1             | 0           | -4.214030               | 1.456001  | 0.766583  |   |
| 8             | 1             | 0           | -1.961146               | 2.414385  | 0.781606  |   |
| 9             | 1             | 0           | -0.410639               | -1.208562 | -0.939660 |   |
| 10            | 1             | 0           | -2.689888               | -2.169819 | -0.930597 |   |
| 11            | 6             | 0           | 1.566480                | 0.515068  | 0.031531  |   |
| 12            | 6             | 0           | 2.760882                | 1.099655  | -0.425126 |   |
| 13            | 6             | 0           | 1.646703                | -0.779242 | 0.595680  |   |
| 14            | 6             | 0           | 3.970471                | 0.426336  | -0.367537 |   |
| 15            | 1             | 0           | 2.734296                | 2.099126  | -0.844501 |   |
| 16            | 6             | 0           | 2.845159                | -1.451847 | 0.663678  |   |
| 17            | 1             | 0           | 0.760951                | -1.234546 | 1.020194  |   |
| 18            | 6             | 0           | 4.018553                | -0.861872 | 0.172623  |   |
| 19            | 1             | 0           | 4.861953                | 0.909833  | -0.742493 |   |
| 20            | 1             | 0           | 2.913944                | -2.435868 | 1.110344  |   |
| 21            | 6             | 0           | 0.400017                | 2.663122  | -0.086549 |   |
| 22            | 7             | 0           | 0.466697                | 3.816234  | -0.137583 |   |
| 23            | 8             | 0           | 5.139213                | -1.604487 | 0.277359  |   |
| 24            | 6             | 0           | 6.355228                | -1.046849 | -0.185889 |   |
| 25            | 1             | 0           | 7.117137                | -1.801327 | -0.007655 |   |
| 26            | 1             | 0           | 6.302477                | -0.825865 | -1.255741 |   |
| 27            | 1             | 0           | 6.604734                | -0.136865 | 0.367128  |   |
| 28            | 6             | 0           | 0.321513                | 1.248621  | -0.026403 |   |
| 29            | 6             | 0           | -4.957390               | -1.072107 | -0.097641 |   |
| 30            | 8             | 0           | -5.095963               | -2.202405 | -0.503977 |   |
| 31            | 6             | 0           | -6.139600               | -0.264883 | 0.388872  |   |
| 32            | 1             | 0           | -6.000512               | 0.027523  | 1.432415  |   |
| 33            | 1             | 0           | -6.248966               | 0.648233  | -0.201019 |   |
| 34            | 1             | 0           | -7.037334               | -0.871448 | 0.295289  |   |

1.2.11. **DAAN-COOH/OMe** radical of D<sub>0</sub> state optimized with UM06-2X/6-311+G(d,p)

| Center Number | Atomic Number | Atomic Type | Coordinates (Angstroms) |           |           | Z |
|---------------|---------------|-------------|-------------------------|-----------|-----------|---|
|               |               |             | X                       | Y         |           |   |
| 1             | 6             | 0           | 2.972964                | 0.989590  | -0.383023 |   |
| 2             | 6             | 0           | 1.686736                | 1.497733  | -0.404792 |   |
| 3             | 6             | 0           | 0.597868                | 0.727919  | 0.048542  |   |
| 4             | 6             | 0           | 0.855801                | -0.559200 | 0.561338  |   |
| 5             | 6             | 0           | 2.143852                | -1.061113 | 0.587540  |   |
| 6             | 6             | 0           | 3.208101                | -0.296766 | 0.106716  |   |
| 7             | 1             | 0           | 3.801773                | 1.583756  | -0.745088 |   |
| 8             | 1             | 0           | 1.508162                | 2.497100  | -0.784628 |   |
| 9             | 1             | 0           | 0.044725                | -1.142627 | 0.977964  |   |
| 10            | 1             | 0           | 2.350260                | -2.044510 | 0.992341  |   |
| 11            | 6             | 0           | -1.970022               | 0.514484  | -0.031655 |   |
| 12            | 6             | 0           | -3.183788               | 1.070626  | 0.409414  |   |
| 13            | 6             | 0           | -2.010791               | -0.786327 | -0.585047 |   |
| 14            | 6             | 0           | -4.374486               | 0.364813  | 0.346776  |   |
| 15            | 1             | 0           | -3.187569               | 2.073935  | 0.820332  |   |
| 16            | 6             | 0           | -3.190303               | -1.491264 | -0.657776 |   |
| 17            | 1             | 0           | -1.109414               | -1.221422 | -0.997625 |   |
| 18            | 6             | 0           | -4.383433               | -0.928658 | -0.182646 |   |
| 19            | 1             | 0           | -5.281895               | 0.827599  | 0.709455  |   |
| 20            | 1             | 0           | -3.228660               | -2.480552 | -1.096401 |   |
| 21            | 6             | 0           | -0.862686               | 2.693604  | 0.081361  |   |
| 22            | 7             | 0           | -0.961842               | 3.844742  | 0.124618  |   |
| 23            | 8             | 0           | -5.483204               | -1.701818 | -0.291124 |   |
| 24            | 6             | 0           | -6.717832               | -1.172213 | 0.155159  |   |
| 25            | 1             | 0           | -7.458047               | -1.947850 | -0.023774 |   |
| 26            | 1             | 0           | -6.681679               | -0.940556 | 1.223465  |   |
| 27            | 1             | 0           | -6.985410               | -0.273838 | -0.408320 |   |
| 28            | 6             | 0           | -0.745770               | 1.281656  | 0.030543  |   |
| 29            | 6             | 0           | 4.572499                | -0.891435 | 0.155383  |   |
| 30            | 8             | 0           | 4.816996                | -1.994498 | 0.570415  |   |
| 31            | 8             | 0           | 5.512298                | -0.060645 | -0.317445 |   |
| 32            | 6             | 0           | 6.845622                | -0.573234 | -0.296167 |   |
| 33            | 1             | 0           | 7.470723                | 0.214829  | -0.706919 |   |
| 34            | 1             | 0           | 7.142723                | -0.808817 | 0.725842  |   |
| 35            | 1             | 0           | 6.912487                | -1.475843 | -0.903723 |   |

1.2.12. **DAAN-CN/OMe** radical of D<sub>0</sub> state optimized with UM06-2X/6-311+G(d,p)

| Center Number | Atomic Number | Atomic Type | Coordinates (Angstroms) |           |           | Z |
|---------------|---------------|-------------|-------------------------|-----------|-----------|---|
|               |               |             | X                       | Y         |           |   |
| 1             | 6             | 0           | 3.840280                | 0.635654  | -0.443424 |   |
| 2             | 6             | 0           | 2.590421                | 1.223712  | -0.462810 |   |
| 3             | 6             | 0           | 1.456935                | 0.532542  | 0.008850  |   |
| 4             | 6             | 0           | 1.635392                | -0.760445 | 0.539184  |   |
| 5             | 6             | 0           | 2.885815                | -1.349066 | 0.566044  |   |
| 6             | 6             | 0           | 3.994010                | -0.658875 | 0.064433  |   |
| 7             | 1             | 0           | 4.703814                | 1.169288  | -0.819852 |   |
| 8             | 1             | 0           | 2.475877                | 2.227416  | -0.855285 |   |
| 9             | 1             | 0           | 0.792074                | -1.284231 | 0.970341  |   |
| 10            | 1             | 0           | 3.017657                | -2.337764 | 0.987347  |   |
| 11            | 6             | 0           | -1.118220               | 0.482258  | -0.042551 |   |
| 12            | 6             | 0           | -2.288523               | 1.121947  | 0.403875  |   |
| 13            | 6             | 0           | -1.248558               | -0.821894 | -0.574628 |   |
| 14            | 6             | 0           | -3.521739               | 0.492216  | 0.367975  |   |
| 15            | 1             | 0           | -2.223164               | 2.129958  | 0.797780  |   |
| 16            | 6             | 0           | -2.470729               | -1.451484 | -0.621209 |   |
| 17            | 1             | 0           | -0.383050               | -1.319033 | -0.994153 |   |
| 18            | 6             | 0           | -3.619574               | -0.806742 | -0.139580 |   |
| 19            | 1             | 0           | -4.393179               | 1.017194  | 0.734035  |   |
| 20            | 1             | 0           | -2.578501               | -2.442355 | -1.044347 |   |
| 21            | 6             | 0           | 0.128601                | 2.588004  | 0.018787  |   |
| 22            | 7             | 0           | 0.108502                | 3.743620  | 0.041141  |   |
| 23            | 8             | 0           | -4.765774               | -1.509776 | -0.220838 |   |
| 24            | 6             | 0           | -5.960082               | -0.897431 | 0.231810  |   |
| 25            | 1             | 0           | -6.748610               | -1.628727 | 0.074562  |   |
| 26            | 1             | 0           | -5.895221               | -0.652103 | 1.295562  |   |
| 27            | 1             | 0           | -6.178636               | 0.006389  | -0.343684 |   |
| 28            | 6             | 0           | 0.151880                | 1.170705  | -0.007294 |   |
| 29            | 6             | 0           | 5.290100                | -1.273492 | 0.085392  |   |
| 30            | 7             | 0           | 6.328795                | -1.768403 | 0.101042  |   |

1.2.13. **DAAN-NO<sub>2</sub>/OMe** radical of D<sub>0</sub> state optimized with UM06-2X/6-311+G(d,p)

| Center Number | Atomic Number | Atomic Type | Coordinates (Angstroms) |           |           | Z |
|---------------|---------------|-------------|-------------------------|-----------|-----------|---|
|               |               |             | X                       | Y         |           |   |
| 1             | 6             | 0           | 3.421131                | 0.874234  | -0.443255 |   |
| 2             | 6             | 0           | 2.146958                | 1.410524  | -0.445500 |   |
| 3             | 6             | 0           | 1.045442                | 0.665213  | 0.020358  |   |
| 4             | 6             | 0           | 1.274985                | -0.629406 | 0.527649  |   |
| 5             | 6             | 0           | 2.547339                | -1.171581 | 0.539267  |   |
| 6             | 6             | 0           | 3.599553                | -0.414831 | 0.041533  |   |
| 7             | 1             | 0           | 4.271927                | 1.431931  | -0.810079 |   |
| 8             | 1             | 0           | 1.989916                | 2.415234  | -0.196969 |   |
| 9             | 1             | 0           | 0.454911                | -1.191922 | 0.954311  |   |
| 10            | 1             | 0           | 2.739475                | -2.158194 | 0.938239  |   |
| 11            | 6             | 0           | -1.525807               | 0.517487  | -0.031419 |   |
| 12            | 6             | 0           | -2.721906               | 1.106143  | 0.418924  |   |
| 13            | 6             | 0           | -1.605041               | -0.782234 | -0.585541 |   |
| 14            | 6             | 0           | -3.930249               | 0.432071  | 0.366080  |   |
| 15            | 1             | 0           | -2.696131               | 2.109056  | 0.829928  |   |
| 16            | 6             | 0           | -2.802499               | -1.455395 | -0.649111 |   |
| 17            | 1             | 0           | -0.719984               | -1.240438 | -1.008456 |   |
| 18            | 6             | 0           | -3.977155               | -0.861421 | -0.163315 |   |
| 19            | 1             | 0           | -4.822493               | 0.917944  | 0.735958  |   |
| 20            | 1             | 0           | -2.871265               | -2.442416 | -1.088947 |   |
| 21            | 6             | 0           | -0.360894               | 2.666785  | 0.085724  |   |
| 22            | 7             | 0           | -0.423969               | 3.819682  | 0.138501  |   |
| 23            | 8             | 0           | -5.095326               | -1.604517 | -0.262431 |   |
| 24            | 6             | 0           | -6.314463               | -1.045385 | 0.194027  |   |
| 25            | 1             | 0           | -7.073665               | -1.803489 | 0.020680  |   |
| 26            | 1             | 0           | -6.263535               | -0.815552 | 1.261906  |   |
| 27            | 1             | 0           | -6.564396               | -0.141236 | -0.367887 |   |
| 28            | 6             | 0           | -0.284234               | 1.252272  | 0.021963  |   |
| 29            | 7             | 0           | 4.955331                | -0.993201 | 0.046966  |   |
| 30            | 8             | 0           | 5.859514                | -0.304567 | -0.374039 |   |
| 31            | 8             | 0           | 5.080405                | -2.122560 | 0.470405  |   |

1.2.14. **DAAN-OMe/diOMe** radical of D<sub>0</sub> state optimized with UM06-2X/6-311+G(d,p)

| Center Number | Atomic Number | Atomic Type | Coordinates (Angstroms) |           |           | Z |
|---------------|---------------|-------------|-------------------------|-----------|-----------|---|
|               |               |             | X                       | Y         |           |   |
| 1             | 6             | 0           | -3.985811               | 0.483339  | -0.384110 |   |
| 2             | 6             | 0           | -2.716050               | 1.004019  | -0.583669 |   |
| 3             | 6             | 0           | -1.564194               | 0.343761  | -0.120462 |   |
| 4             | 6             | 0           | -1.749885               | -0.866422 | 0.587858  |   |
| 5             | 6             | 0           | -3.007469               | -1.387889 | 0.792732  |   |
| 6             | 6             | 0           | -4.139235               | -0.723462 | 0.301836  |   |
| 7             | 1             | 0           | -4.841623               | 1.023037  | -0.765905 |   |
| 8             | 1             | 0           | -2.609397               | 1.941692  | -1.117042 |   |
| 9             | 1             | 0           | -0.890830               | -1.376342 | 1.005846  |   |
| 10            | 1             | 0           | -3.152065               | -2.306993 | 1.346990  |   |
| 11            | 6             | 0           | 0.979468                | 0.126430  | -0.265578 |   |
| 12            | 6             | 0           | 2.183255                | 0.671147  | 0.231916  |   |
| 13            | 6             | 0           | 1.024772                | -1.188991 | -0.759626 |   |

|    |   |   |           |           |           |
|----|---|---|-----------|-----------|-----------|
| 14 | 6 | 0 | 3.368198  | -0.066277 | 0.227110  |
| 15 | 6 | 0 | 2.185766  | -1.932929 | -0.767624 |
| 16 | 1 | 0 | 0.120790  | -1.612479 | -1.180844 |
| 17 | 6 | 0 | 3.364487  | -1.369249 | -0.272313 |
| 18 | 1 | 0 | 4.273369  | 0.369073  | 0.621348  |
| 19 | 1 | 0 | 2.216025  | -2.937522 | -1.168146 |
| 20 | 6 | 0 | -0.178277 | 2.279545  | -0.674781 |
| 21 | 7 | 0 | -0.176957 | 3.390810  | -0.995069 |
| 22 | 8 | 0 | -5.328404 | -1.318658 | 0.549570  |
| 23 | 8 | 0 | 4.462976  | -2.158031 | -0.316351 |
| 24 | 6 | 0 | -6.499892 | -0.674812 | 0.088673  |
| 25 | 1 | 0 | -6.491948 | -0.576220 | -1.000874 |
| 26 | 1 | 0 | -7.329644 | -1.309678 | 0.389576  |
| 27 | 1 | 0 | -6.611211 | 0.312990  | 0.545491  |
| 28 | 6 | 0 | 5.686521  | -1.630509 | 0.153758  |
| 29 | 1 | 0 | 6.424683  | -2.416923 | 0.016591  |
| 30 | 1 | 0 | 5.982752  | -0.748612 | -0.422242 |
| 31 | 1 | 0 | 5.623264  | -1.373002 | 1.215429  |
| 32 | 6 | 0 | -0.247724 | 0.909053  | -0.320676 |
| 33 | 8 | 0 | 2.100120  | 1.919067  | 0.733741  |
| 34 | 6 | 0 | 3.283616  | 2.589833  | 1.114547  |
| 35 | 1 | 0 | 3.755155  | 2.101255  | 1.972791  |
| 36 | 1 | 0 | 3.990032  | 2.640484  | 0.281002  |
| 37 | 1 | 0 | 2.976538  | 3.595014  | 1.392248  |

|    |   |   |           |           |           |
|----|---|---|-----------|-----------|-----------|
| 17 | 1 | 0 | 4.597229  | 0.293618  | 0.582289  |
| 18 | 1 | 0 | 2.517535  | -2.760036 | -1.589066 |
| 19 | 6 | 0 | 0.000026  | 2.211809  | -0.000177 |
| 20 | 7 | 0 | -0.000005 | 3.368236  | -0.000106 |
| 21 | 8 | 0 | -4.797935 | -2.034594 | 0.775522  |
| 22 | 8 | 0 | 4.798051  | -2.034456 | -0.775490 |
| 23 | 6 | 0 | -6.034215 | -1.541355 | 0.302544  |
| 24 | 1 | 0 | -6.037239 | -1.464874 | -0.789129 |
| 25 | 1 | 0 | -6.785026 | -2.262809 | 0.615724  |
| 26 | 1 | 0 | -6.262613 | -0.564829 | 0.740302  |
| 27 | 6 | 0 | 6.034273  | -1.541230 | -0.302347 |
| 28 | 1 | 0 | 6.785134  | -2.262631 | -0.615530 |
| 29 | 1 | 0 | 6.262683  | -0.564653 | -0.739984 |
| 30 | 1 | 0 | 6.037194  | -1.464860 | 0.789334  |
| 31 | 6 | 0 | -0.000007 | 0.794514  | -0.000112 |
| 32 | 8 | 0 | -2.398349 | 1.708636  | -1.099219 |
| 33 | 8 | 0 | 2.398184  | 1.708542  | 1.099369  |
| 34 | 6 | 0 | -3.584589 | 2.359379  | -1.502507 |
| 35 | 1 | 0 | -4.136858 | 1.758651  | -2.231997 |
| 36 | 1 | 0 | -4.223251 | 2.577768  | -0.641677 |
| 37 | 1 | 0 | -3.266459 | 3.290702  | -1.964510 |
| 38 | 6 | 0 | 3.584368  | 2.359314  | 1.502772  |
| 39 | 1 | 0 | 4.136617  | 1.758571  | 2.232266  |
| 40 | 1 | 0 | 4.223078  | 2.577778  | 0.641996  |
| 41 | 1 | 0 | 3.266169  | 3.290598  | 1.964805  |

1.2.15. **DAAN-OMe/triOMe** radical of D<sub>0</sub> state optimized with UM06-2X/6-311+G(d,p)

| Center Number | Atomic Number | Atomic Type | Coordinates (Angstroms) |           |           |
|---------------|---------------|-------------|-------------------------|-----------|-----------|
|               |               |             | X                       | Y         | Z         |
| 1             | 6             | 0           | -4.009925               | 0.635164  | 0.252518  |
| 2             | 6             | 0           | -2.760942               | 1.077595  | 0.661541  |
| 3             | 6             | 0           | -1.575608               | 0.492776  | 0.179366  |
| 4             | 6             | 0           | -1.701211               | -0.559472 | -0.758432 |
| 5             | 6             | 0           | -2.935788               | -1.000268 | -1.172105 |
| 6             | 6             | 0           | -4.104709               | -0.411803 | -0.666723 |
| 7             | 1             | 0           | -4.894702               | 1.110233  | 0.653638  |
| 8             | 1             | 0           | -2.697146               | 1.890550  | 1.375925  |
| 9             | 1             | 0           | -0.806585               | -1.010877 | -1.170015 |
| 10            | 1             | 0           | -3.036668               | -1.798034 | -1.897620 |
| 11            | 6             | 0           | 0.977277                | 0.281551  | 0.301746  |
| 12            | 6             | 0           | 2.057792                | 0.977250  | -0.261999 |
| 13            | 6             | 0           | 1.174752                | -1.078344 | 0.626626  |
| 14            | 6             | 0           | 3.285694                | 0.359337  | -0.516229 |
| 15            | 6             | 0           | 2.381564                | -1.714566 | 0.371103  |
| 16            | 6             | 0           | 3.427875                | -0.988624 | -0.199159 |
| 17            | 1             | 0           | 4.094611                | 0.915063  | -0.962382 |
| 18            | 1             | 0           | 2.558633                | -2.750634 | 0.618434  |
| 19            | 6             | 0           | -0.219426               | 2.178864  | 1.327941  |
| 20            | 7             | 0           | -0.190220               | 3.156120  | 1.945962  |
| 21            | 8             | 0           | -5.269654               | -0.919741 | -1.132778 |
| 22            | 8             | 0           | 4.567410                | -1.690731 | -0.407691 |
| 23            | 6             | 0           | -6.474671               | -0.347096 | -0.665704 |
| 24            | 1             | 0           | -6.534390               | 0.713055  | -0.929243 |
| 25            | 1             | 0           | -7.276878               | -0.889878 | -1.159822 |
| 26            | 1             | 0           | -6.570524               | -0.460871 | 0.418213  |
| 27            | 6             | 0           | 5.676440                | -1.014012 | -0.963371 |
| 28            | 1             | 0           | 6.472686                | -1.751170 | -1.033635 |
| 29            | 1             | 0           | 5.445580                | -0.631995 | -1.962336 |
| 30            | 1             | 0           | 5.998559                | -0.190283 | -0.319414 |
| 31            | 6             | 0           | -0.285442               | 0.969054  | 0.594315  |
| 32            | 8             | 0           | 1.814338                | 2.269440  | -0.565418 |
| 33            | 6             | 0           | 2.883358                | 3.083316  | -1.002228 |
| 34            | 1             | 0           | 3.695086                | 3.090888  | -0.269319 |
| 35            | 1             | 0           | 3.261967                | 2.750160  | -1.973389 |
| 36            | 1             | 0           | 2.471643                | 4.084915  | -1.097912 |
| 37            | 8             | 0           | 0.131322                | -1.692370 | 1.225326  |
| 38            | 6             | 0           | 0.263960                | -3.055243 | 1.576224  |
| 39            | 1             | 0           | 0.450870                | -3.672858 | 0.692777  |
| 40            | 1             | 0           | 1.070340                | -3.197623 | 2.301322  |
| 41            | 1             | 0           | -0.684820               | -3.339139 | 2.024953  |

1.2.16. **DAAN-diOMe/diOMe** radical of D<sub>0</sub> state optimized with UM06-2X/6-311+G(d,p)

| Center Number | Atomic Number | Atomic Type | Coordinates (Angstroms) |           |           |
|---------------|---------------|-------------|-------------------------|-----------|-----------|
|               |               |             | X                       | Y         | Z         |
| 1             | 6             | 0           | -3.681079               | -0.105721 | -0.175290 |
| 2             | 6             | 0           | -2.478806               | 0.574247  | -0.378676 |
| 3             | 6             | 0           | -1.258364               | 0.076966  | 0.133393  |
| 4             | 6             | 0           | -1.310107               | -1.145169 | 0.830809  |
| 5             | 6             | 0           | -2.487339               | -1.832420 | 1.032948  |
| 6             | 6             | 0           | -3.681921               | -1.308255 | 0.531504  |
| 7             | 1             | 0           | -4.597304               | 0.293624  | -0.582040 |
| 8             | 1             | 0           | -0.389810               | -1.535705 | 1.248454  |
| 9             | 1             | 0           | -2.517316               | -2.760213 | 1.588776  |
| 10            | 6             | 0           | 1.258381                | 0.076974  | -0.133542 |
| 11            | 6             | 0           | 2.478747                | 0.574228  | 0.378714  |
| 12            | 6             | 0           | 1.310213                | -1.145086 | -0.831070 |
| 13            | 6             | 0           | 3.681057                | -0.105699 | 0.175394  |
| 14            | 6             | 0           | 2.487481                | -1.832299 | -1.033149 |
| 15            | 1             | 0           | 0.389964                | -1.535594 | -1.248848 |
| 16            | 6             | 0           | 3.681997                | -1.308161 | -0.531522 |

1.2.17. **DAAN-diOMe/triOMe** radical of D<sub>0</sub> state optimized with UM06-2X/6-311+G(d,p)

| Center Number | Atomic Number | Atomic Type | Coordinates (Angstroms) |           |           |
|---------------|---------------|-------------|-------------------------|-----------|-----------|
|               |               |             | X                       | Y         | Z         |
| 1             | 6             | 0           | -3.743338               | 0.018615  | -0.150483 |
| 2             | 6             | 0           | -2.594998               | 0.683234  | 0.278342  |
| 3             | 6             | 0           | -1.297179               | 0.219238  | -0.064725 |
| 4             | 6             | 0           | -1.235339               | -0.954277 | -0.850158 |
| 5             | 6             | 0           | -2.359493               | -1.620624 | -1.277059 |
| 6             | 6             | 0           | -3.624063               | -1.133936 | -0.927986 |
| 7             | 1             | 0           | -4.715098               | 0.394237  | 0.130070  |
| 8             | 1             | 0           | -0.259590               | -1.323300 | -1.141255 |
| 9             | 1             | 0           | -2.295775               | -2.509890 | -1.890315 |
| 10            | 6             | 0           | 1.228115                | 0.243653  | 0.194189  |
| 11            | 6             | 0           | 2.263931                | 0.869360  | -0.512351 |
| 12            | 6             | 0           | 1.513133                | -0.990600 | 0.814935  |
| 13            | 6             | 0           | 3.541674                | 0.307798  | -0.606797 |
| 14            | 6             | 0           | 2.769987                | -1.573392 | 0.723182  |
| 15            | 6             | 0           | 3.775756                | -0.915153 | 0.014733  |
| 16            | 1             | 0           | 4.317430                | 0.807366  | -1.164017 |
| 17            | 1             | 0           | 3.014843                | -2.511466 | 1.198631  |
| 18            | 6             | 0           | -0.064321               | 2.209523  | 0.836986  |
| 19            | 7             | 0           | 0.056031                | 3.281692  | 1.254635  |
| 20            | 8             | 0           | -4.681606               | -1.842855 | -1.388329 |
| 21            | 8             | 0           | 4.971163                | -1.554631 | -0.014611 |
| 22            | 6             | 0           | -5.980725               | -1.385814 | -1.074705 |
| 23            | 1             | 0           | -6.153762               | -0.383021 | -1.477107 |
| 24            | 1             | 0           | -6.667363               | -2.086906 | -1.543106 |
| 25            | 1             | 0           | -6.147381               | -1.381636 | 0.006866  |
| 26            | 6             | 0           | 6.040684                | -0.935644 | -0.698787 |
| 27            | 1             | 0           | 6.892939                | -1.602046 | -0.588750 |
| 28            | 1             | 0           | 5.810987                | -0.811976 | -1.761504 |
| 29            | 1             | 0           | 6.279948                | 0.037217  | -0.258925 |
| 30            | 6             | 0           | -0.092661               | 0.886540  | 0.330739  |
| 31            | 8             | 0           | 1.932484                | 2.029297  | -1.118312 |
| 32            | 6             | 0           | 2.957043                | 2.825089  | -1.676342 |
| 33            | 1             | 0           | 3.724246                | 3.054446  | -0.931406 |
| 34            | 1             | 0           | 3.413773                | 2.334482  | -2.541632 |
| 35            | 1             | 0           | 2.475177                | 3.746017  | -1.995443 |
| 36            | 8             | 0           | 0.495525                | -1.541298 | 1.513431  |
| 37            | 6             | 0           | 0.720048                | -2.775535 | 2.163600  |
| 38            | 1             | 0           | 0.983921                | -3.557240 | 1.445094  |
| 39            | 1             | 0           | 1.509405                | -2.686419 | 2.915620  |
| 40            | 1             | 0           | -0.218901               | -3.030191 | 2.649247  |
| 41            | 8             | 0           | -2.639428               | 1.780379  | 1.054023  |
| 42            | 6             | 0           | -3.885461               | 2.357381  | 1.379117  |
| 43            | 1             | 0           | -4.435015               | 2.639361  | 0.475992  |
| 44            | 1             | 0           | -4.490451               | 1.674227  | 1.983303  |
| 45            | 1             | 0           | -3.653419               | 3.248021  | 1.957981  |

1.2.18. **DAAN-triOMe/triOMe** radical of D<sub>0</sub> state optimized with UM06-2X/6-311+G(d,p)

| Center Number | Atomic Number | Atomic Type | Coordinates (Angstroms) |           |           |
|---------------|---------------|-------------|-------------------------|-----------|-----------|
|               |               |             | X                       | Y         | Z         |
| 1             | 6             | 0           | -3.700922               | 0.298341  | -0.241337 |
| 2             | 6             | 0           | -2.459034               | 0.914324  | -0.422832 |
| 3             | 6             | 0           | -1.275450               | 0.411388  | 0.152064  |
| 4             | 6             | 0           | -1.392155               | -0.786995 | 0.902228  |
| 5             | 6             | 0           | -2.611754               | -1.420029 | 1.079511  |
| 6             | 6             | 0           | -3.761478               | -0.868936 | 0.510706  |
| 7             | 1             | 0           | -4.583062               | 0.711689  | -0.703366 |
| 8             | 1             | 0           | -2.719913               | -2.320588 | 1.665265  |
| 9             | 6             | 0           | 1.275423                | 0.411399  | -0.152196 |
| 10            | 6             | 0           | 2.458952                | 0.914392  | 0.422763  |
| 11            | 6             | 0           | 1.392221                | -0.787009 | -0.902315 |

|    |   |   |           |           |           |
|----|---|---|-----------|-----------|-----------|
| 12 | 6 | 0 | 3.700869  | 0.298436  | 0.241391  |
| 13 | 6 | 0 | 2.611851  | -1.420017 | -1.079474 |
| 14 | 6 | 0 | 3.761514  | -0.868873 | -0.510596 |
| 15 | 1 | 0 | 4.582966  | 0.711830  | 0.703461  |
| 16 | 1 | 0 | 2.720081  | -2.320590 | -1.665193 |
| 17 | 6 | 0 | -0.000008 | 2.515232  | 0.000002  |
| 18 | 7 | 0 | -0.000094 | 3.671598  | 0.000013  |
| 19 | 8 | 0 | -4.907606 | -1.554109 | 0.747259  |
| 20 | 8 | 0 | 4.907680  | -1.554023 | -0.747034 |
| 21 | 6 | 0 | -6.110533 | -1.039620 | 0.215192  |
| 22 | 1 | 0 | -6.077017 | -1.007388 | -0.878130 |
| 23 | 1 | 0 | -6.895564 | -1.722040 | 0.532508  |
| 24 | 1 | 0 | -6.317901 | -0.038700 | 0.605511  |
| 25 | 6 | 0 | 6.110552  | -1.039480 | -0.214894 |
| 26 | 1 | 0 | 6.895625  | -1.721892 | -0.532123 |
| 27 | 1 | 0 | 6.317922  | -0.038570 | -0.605236 |
| 28 | 1 | 0 | 6.076950  | -1.007209 | 0.878425  |
| 29 | 6 | 0 | -0.000019 | 1.095003  | -0.000110 |
| 30 | 8 | 0 | 2.308035  | 2.001187  | 1.204961  |
| 31 | 8 | 0 | 0.250359  | -1.247248 | -1.457842 |
| 32 | 8 | 0 | -0.250219 | -1.247189 | 1.457641  |
| 33 | 8 | 0 | -2.308214 | 2.001068  | -1.205121 |
| 34 | 6 | 0 | 3.449689  | 2.714187  | 1.628934  |
| 35 | 1 | 0 | 4.035546  | 2.133514  | 2.348530  |
| 36 | 1 | 0 | 4.077441  | 2.991334  | 0.777173  |
| 37 | 1 | 0 | 3.072359  | 3.613639  | 2.109709  |
| 38 | 6 | 0 | 0.294715  | -2.450612 | -2.193826 |
| 39 | 1 | 0 | 0.938800  | -2.353610 | -3.072925 |
| 40 | 1 | 0 | 0.647373  | -3.279539 | -1.572271 |
| 41 | 1 | 0 | -0.728032 | -2.642125 | -2.510805 |
| 42 | 6 | 0 | -0.294474 | -2.450496 | 2.193725  |
| 43 | 1 | 0 | -0.938482 | -2.353439 | 3.072875  |
| 44 | 1 | 0 | -0.647166 | -3.279484 | 1.572270  |
| 45 | 1 | 0 | 0.728307  | -2.641956 | 2.510626  |
| 46 | 6 | 0 | -3.449921 | 2.714079  | -1.628937 |
| 47 | 1 | 0 | -4.035877 | 2.133415  | -2.348460 |
| 48 | 1 | 0 | -4.077557 | 2.991223  | -0.777091 |
| 49 | 1 | 0 | -3.072649 | 3.613532  | -2.109757 |

|    |   |   |           |           |           |
|----|---|---|-----------|-----------|-----------|
| 7  | 1 | 0 | 2.335591  | 1.767112  | 0.789787  |
| 8  | 1 | 0 | 0.569571  | -1.719433 | -0.991076 |
| 9  | 1 | 0 | 2.814504  | -2.780475 | -1.082647 |
| 10 | 6 | 0 | -1.288978 | 0.089849  | 0.059332  |
| 11 | 6 | 0 | -2.445086 | 0.771724  | -0.379708 |
| 12 | 6 | 0 | -1.430531 | -1.200555 | 0.591629  |
| 13 | 6 | 0 | -3.692887 | 0.176196  | -0.316528 |
| 14 | 1 | 0 | -2.335593 | 1.767128  | -0.789771 |
| 15 | 6 | 0 | -2.685326 | -1.789067 | 0.665414  |
| 16 | 1 | 0 | -0.569589 | -1.719438 | 0.991067  |
| 17 | 6 | 0 | -3.817829 | -1.125212 | 0.218981  |
| 18 | 1 | 0 | -2.814526 | -2.780471 | 1.082629  |
| 19 | 6 | 0 | 0.000000  | 2.170113  | 0.000009  |
| 20 | 7 | 0 | 0.000070  | 3.327129  | 0.000033  |
| 21 | 8 | 0 | 5.020849  | -1.757900 | -0.260398 |
| 22 | 8 | 0 | -5.020865 | -1.757884 | 0.260391  |
| 23 | 6 | 0 | 5.968088  | -1.205713 | -1.172676 |
| 24 | 1 | 0 | 6.224203  | -0.181629 | -0.899807 |
| 25 | 1 | 0 | 6.851902  | -1.837182 | -1.110145 |
| 26 | 1 | 0 | 5.567718  | -1.234775 | -2.190454 |
| 27 | 6 | 0 | -5.968099 | -1.205720 | 1.172689  |
| 28 | 1 | 0 | -6.851913 | -1.837188 | 1.110146  |
| 29 | 1 | 0 | -5.567723 | -1.234809 | 2.190464  |
| 30 | 1 | 0 | -6.224218 | -0.181629 | 0.899850  |
| 31 | 6 | 0 | -0.000003 | 0.753458  | 0.000005  |
| 32 | 8 | 0 | -4.839023 | 0.749570  | -0.754149 |
| 33 | 6 | 0 | -4.750437 | 2.038781  | -1.332533 |
| 34 | 1 | 0 | -4.108121 | 2.026854  | -2.217707 |
| 35 | 1 | 0 | -5.763727 | 2.306069  | -1.622092 |
| 36 | 1 | 0 | -4.368888 | 2.768737  | -0.612784 |
| 37 | 8 | 0 | 4.839022  | 0.749541  | 0.754148  |
| 38 | 6 | 0 | 4.750461  | 2.038771  | 1.332492  |
| 39 | 1 | 0 | 5.763760  | 2.306059  | 1.622020  |
| 40 | 1 | 0 | 4.368902  | 2.768710  | 0.612729  |
| 41 | 1 | 0 | 4.108165  | 2.026880  | 2.217682  |

1.3. DAAN radical geometries of D<sub>1</sub> state optimized with UM06-2X/6-311+G(d,p)  
1.3.1. DAAN-H/H radical of D<sub>1</sub> state optimized with UM06-2X/6-311+G(d,p)

1.2.19. DAAN-OMe/diOMe-m radical of D<sub>0</sub> state optimized with UM06-2X/6-311+G(d,p)

| Center Number | Atomic Number | Atomic Type | Coordinates (Angstroms) |           |           |
|---------------|---------------|-------------|-------------------------|-----------|-----------|
|               |               |             | X                       | Y         | Z         |
| 1             | 6             | 0           | -4.162310               | 0.578864  | -0.474459 |
| 2             | 6             | 0           | -2.871750               | 1.067804  | -0.610925 |
| 3             | 6             | 0           | -1.766769               | 0.403966  | -0.052969 |
| 4             | 6             | 0           | -2.019487               | -0.768896 | 0.693109  |
| 5             | 6             | 0           | -3.298549               | -1.258334 | 0.838747  |
| 6             | 6             | 0           | -4.382516               | -0.596300 | 0.247566  |
| 7             | 1             | 0           | -4.981175               | 1.117378  | -0.931291 |
| 8             | 1             | 0           | -2.711894               | 1.981530  | -1.172409 |
| 9             | 1             | 0           | -1.200731               | -1.270358 | 1.193367  |
| 10            | 1             | 0           | -3.497366               | -2.147593 | 1.423891  |
| 11            | 6             | 0           | 0.801620                | 0.184024  | -0.121659 |
| 12            | 6             | 0           | 2.007413                | 0.835798  | 0.216932  |
| 13            | 6             | 0           | 0.839891                | -1.184766 | -0.426331 |
| 14            | 6             | 0           | 3.203323                | 0.140976  | 0.275050  |
| 15            | 1             | 0           | 1.977386                | 1.891675  | 0.451837  |
| 16            | 6             | 0           | 2.043192                | -1.875142 | -0.379591 |
| 17            | 1             | 0           | -0.058824               | -1.694519 | -0.747184 |
| 18            | 6             | 0           | 3.224349                | -1.237450 | -0.032302 |
| 19            | 1             | 0           | 2.092722                | -2.929918 | -0.621882 |
| 20            | 6             | 0           | -0.316429               | 2.339114  | -0.434620 |
| 21            | 7             | 0           | -0.216292               | 3.475799  | -0.625737 |
| 22            | 8             | 0           | -5.955519               | -1.159363 | 0.441414  |
| 23            | 8             | 0           | 4.373096                | -1.961360 | 0.053144  |
| 24            | 6             | 0           | -6.723528               | -0.516558 | -0.120130 |
| 25            | 1             | 0           | -6.644013               | -0.464452 | -1.209919 |
| 26            | 1             | 0           | -7.582051               | -1.125256 | 0.152426  |
| 27            | 1             | 0           | -6.845395               | 0.490891  | 0.288264  |
| 28            | 6             | 0           | 5.361668                | -1.649225 | -0.926132 |
| 29            | 1             | 0           | 6.193391                | -2.326552 | -0.743392 |
| 30            | 1             | 0           | 4.961668                | -1.821822 | -1.929791 |
| 31            | 1             | 0           | 5.696986                | -0.616203 | -0.829130 |
| 32            | 6             | 0           | -0.430758               | 0.947470  | -0.197070 |
| 33            | 8             | 0           | 4.390956                | 0.687885  | 0.628381  |
| 34            | 6             | 0           | 4.404635                | 2.059256  | 0.979811  |
| 35            | 1             | 0           | 3.761247                | 2.247837  | 1.843952  |
| 36            | 1             | 0           | 5.435425                | 2.291212  | 1.236248  |
| 37            | 1             | 0           | 4.084427                | 2.684652  | 0.141488  |

1.2.20. DAAN-diOMe-m/diOMe-m radical of D<sub>0</sub> state optimized with UM06-2X/6-311+G(d,p)

| Center Number | Atomic Number | Atomic Type | Coordinates (Angstroms) |           |           |
|---------------|---------------|-------------|-------------------------|-----------|-----------|
|               |               |             | X                       | Y         | Z         |
| 1             | 6             | 0           | 3.692879                | 0.176177  | 0.316533  |
| 2             | 6             | 0           | 2.445081                | 0.771710  | 0.379718  |
| 3             | 6             | 0           | 1.288969                | 0.089842  | -0.059326 |
| 4             | 6             | 0           | 1.430516                | -1.200558 | -0.591633 |
| 5             | 6             | 0           | 2.685308                | -1.789075 | -0.665424 |
| 6             | 6             | 0           | 3.817814                | -1.125228 | -0.218984 |

1.3.2. DAAN-H/Me radical of D<sub>1</sub> state optimized with UM06-2X/6-311+G(d,p)

| Center Number | Atomic Number | Atomic Type | Coordinates (Angstroms) |           |           |
|---------------|---------------|-------------|-------------------------|-----------|-----------|
|               |               |             | X                       | Y         | Z         |
| 1             | 6             | 0           | 4.113995                | -0.059811 | -0.321709 |
| 2             | 6             | 0           | 4.115896                | -1.409168 | 0.084436  |
| 3             | 6             | 0           | 2.908350                | -2.003602 | 0.484539  |
| 4             | 6             | 0           | 1.729113                | -1.297690 | 0.452046  |
| 5             | 6             | 0           | 1.693336                | 0.069047  | 0.011764  |
| 6             | 6             | 0           | 2.949325                | 0.662840  | -0.350847 |
| 7             | 1             | 0           | 5.043142                | 0.412706  | -0.617101 |
| 8             | 1             | 0           | 2.905863                | -3.028593 | 0.836356  |
| 9             | 1             | 0           | 0.822823                | -1.761624 | 0.817092  |
| 10            | 1             | 0           | 2.961233                | 1.700174  | -0.663370 |
| 11            | 6             | 0           | 0.497825                | 0.844501  | -0.011102 |
| 12            | 6             | 0           | -0.835662               | 0.358295  | -0.015710 |
| 13            | 6             | 0           | -1.189458               | -0.972997 | -0.480175 |
| 14            | 6             | 0           | -1.940421               | 1.216929  | 0.363064  |
| 15            | 6             | 0           | -2.485824               | -1.398292 | -0.491178 |
| 16            | 1             | 0           | -0.412683               | -1.613044 | -0.874634 |
| 17            | 6             | 0           | -3.222701               | 0.769065  | 0.345995  |
| 18            | 1             | 0           | -1.720162               | 2.230398  | 0.765523  |
| 19            | 6             | 0           | -3.552363               | -0.565926 | -0.059263 |
| 20            | 1             | 0           | -2.717005               | -2.393731 | -0.855702 |
| 21            | 1             | 0           | -0.425667               | 1.431587  | 0.652234  |
| 22            | 6             | 0           | 0.648774                | 2.263195  | -0.008841 |

|    |   |   |           |           |           |
|----|---|---|-----------|-----------|-----------|
| 23 | 7 | 0 | 0.761483  | 3.412878  | -0.013119 |
| 24 | 1 | 0 | 5.037466  | -1.976464 | 0.098114  |
| 25 | 6 | 0 | -4.964371 | -1.043870 | -0.013387 |
| 26 | 1 | 0 | -5.078375 | -2.008504 | -0.508404 |
| 27 | 1 | 0 | -5.304486 | -1.153806 | 1.023544  |
| 28 | 1 | 0 | -5.637413 | -0.324351 | -0.489612 |

### 1.3.3. DAAN-H/OMe radical of D<sub>1</sub> state optimized with UM06-2X/6-311+G(d,p)

| Center Number | Atomic Number | Atomic Type | Coordinates (Angstroms) |           |           |
|---------------|---------------|-------------|-------------------------|-----------|-----------|
|               |               |             | X                       | Y         | Z         |
| 1             | 6             | 0           | -4.520769               | -0.071974 | -0.248893 |
| 2             | 6             | 0           | -3.358234               | 0.659146  | -0.301944 |
| 3             | 6             | 0           | -2.095391               | 0.072247  | 0.021035  |
| 4             | 6             | 0           | -2.111969               | -1.292868 | 0.445688  |
| 5             | 6             | 0           | -3.288743               | -2.010056 | 0.500842  |
| 6             | 6             | 0           | -4.506552               | -1.421476 | 0.142815  |
| 7             | 1             | 0           | -5.459046               | 0.400359  | -0.515184 |
| 8             | 1             | 0           | -3.385498               | 1.699747  | -0.603421 |
| 9             | 1             | 0           | -1.194398               | -1.760247 | 0.778186  |
| 10            | 1             | 0           | -3.267554               | -3.039847 | 0.838403  |
| 11            | 6             | 0           | -0.901636               | 0.855486  | -0.024635 |
| 12            | 6             | 0           | 0.440137                | 0.358492  | -0.033297 |
| 13            | 6             | 0           | 1.540771                | 1.192191  | 0.413310  |
| 14            | 6             | 0           | 0.790608                | -0.937019 | -0.559985 |
| 15            | 6             | 0           | 2.839687                | 0.773047  | 0.357520  |
| 16            | 1             | 0           | 1.310721                | 2.180176  | 0.792050  |
| 17            | 6             | 0           | 2.083036                | -1.358491 | -0.600160 |
| 18            | 1             | 0           | 0.011809                | -1.562702 | -0.973811 |
| 19            | 6             | 0           | 3.143340                | -0.520737 | -0.132747 |
| 20            | 1             | 0           | 3.625823                | 1.432963  | 0.700358  |
| 21            | 1             | 0           | 2.349883                | -2.327915 | -1.004131 |
| 22            | 6             | 0           | -1.031723               | 2.268578  | -0.063856 |
| 23            | 7             | 0           | -1.111476               | 3.422781  | -0.092579 |
| 24            | 8             | 0           | 4.369471                | -1.050335 | -0.202641 |
| 25            | 6             | 0           | 5.473363                | -0.280221 | 0.250848  |
| 26            | 1             | 0           | 6.350860                | -0.903941 | 0.105308  |
| 27            | 1             | 0           | 5.568802                | 0.636729  | -0.335718 |
| 28            | 1             | 0           | 5.362585                | -0.036918 | 1.310261  |
| 29            | 1             | 0           | -5.424970               | -1.993274 | 0.177637  |

### 1.3.4. DAAN-Me/OMe radical of D<sub>1</sub> state optimized with UM06-2X/6-311+G(d,p)

| Center Number | Atomic Number | Atomic Type | Coordinates (Angstroms) |           |           |
|---------------|---------------|-------------|-------------------------|-----------|-----------|
|               |               |             | X                       | Y         | Z         |
| 1             | 6             | 0           | -4.106605               | 0.460496  | -0.277200 |
| 2             | 6             | 0           | -2.887134               | 1.078553  | -0.317747 |
| 3             | 6             | 0           | -1.678249               | 0.373043  | 0.002073  |
| 4             | 6             | 0           | -1.834686               | -0.993154 | 0.415493  |
| 5             | 6             | 0           | -3.072736               | -1.591976 | 0.455072  |
| 6             | 6             | 0           | -4.242604               | -0.900615 | 0.096060  |
| 7             | 1             | 0           | -4.996834               | 1.022777  | -0.540778 |
| 8             | 1             | 0           | -2.817608               | 2.121059  | -0.605236 |
| 9             | 1             | 0           | -0.971468               | -1.548163 | 0.757163  |
| 10            | 1             | 0           | -3.151680               | -2.622654 | 0.785606  |
| 11            | 6             | 0           | -0.420981               | 1.040326  | -0.028204 |
| 12            | 6             | 0           | 0.868797                | 0.428050  | -0.036739 |
| 13            | 6             | 0           | 2.039349                | 1.168046  | 0.382594  |
| 14            | 6             | 0           | 1.102734                | -0.903605 | -0.534937 |
| 15            | 6             | 0           | 3.296522                | 0.630990  | 0.337546  |
| 16            | 1             | 0           | 1.903283                | 2.181432  | 0.739397  |
| 17            | 6             | 0           | 2.354512                | -1.438671 | -0.572704 |
| 18            | 1             | 0           | 0.273149                | -1.468701 | -0.936968 |
| 19            | 6             | 0           | 3.482614                | -0.692908 | -0.124901 |
| 20            | 1             | 0           | 4.138475                | 1.225712  | 0.666810  |
| 21            | 1             | 0           | 2.530888                | -2.435143 | -0.960061 |
| 22            | 6             | 0           | -0.434145               | 2.462614  | -0.041439 |
| 23            | 7             | 0           | -0.427286               | 3.619113  | -0.050229 |
| 24            | 8             | 0           | 4.660841                | -1.329137 | -0.185878 |
| 25            | 6             | 0           | 5.825547                | -0.645751 | 0.249900  |
| 26            | 1             | 0           | 6.647607                | -1.343876 | 0.117724  |
| 27            | 1             | 0           | 5.998306                | 0.247418  | -0.355799 |
| 28            | 1             | 0           | 5.739769                | -0.370432 | 1.304070  |
| 29            | 6             | 0           | -5.586681               | -1.561827 | 0.095349  |
| 30            | 1             | 0           | -5.950357               | -1.706064 | -0.927799 |
| 31            | 1             | 0           | -5.549860               | -2.538761 | 0.578682  |
| 32            | 1             | 0           | -6.326919               | -0.946954 | 0.614519  |

### 1.3.5. DAAN-OMe/OMe radical of D<sub>1</sub> state optimized with UM06-2X/6-311+G(d,p)

| Center Number | Atomic Number | Atomic Type | Coordinates (Angstroms) |           |           |
|---------------|---------------|-------------|-------------------------|-----------|-----------|
|               |               |             | X                       | Y         | Z         |
| 1             | 6             | 0           | 3.711231                | 0.591201  | 0.283577  |
| 2             | 6             | 0           | 2.467640                | 1.166500  | 0.332591  |
| 3             | 6             | 0           | 1.273522                | 0.447799  | -0.029414 |
| 4             | 6             | 0           | 1.463640                | -0.901228 | -0.490198 |
| 5             | 6             | 0           | 2.702495                | -1.473174 | -0.536788 |
| 6             | 6             | 0           | 3.853434                | -0.748758 | -0.136886 |
| 7             | 1             | 0           | 4.574284                | 1.174503  | 0.576546  |

|    |   |   |           |           |           |
|----|---|---|-----------|-----------|-----------|
| 8  | 1 | 0 | 2.370006  | 2.195403  | 0.656930  |
| 9  | 1 | 0 | 0.614028  | -1.459414 | -0.859282 |
| 10 | 1 | 0 | 2.841481  | -2.485525 | -0.897208 |
| 11 | 6 | 0 | -1.273523 | 0.447799  | 0.029415  |
| 12 | 6 | 0 | -2.467640 | 1.166499  | -0.332596 |
| 13 | 6 | 0 | -1.463642 | -0.901228 | 0.490201  |
| 14 | 6 | 0 | -3.711231 | 0.591201  | -0.283582 |
| 15 | 1 | 0 | -2.370004 | 2.195401  | -0.656938 |
| 16 | 6 | 0 | -2.702497 | -1.473172 | 0.536791  |
| 17 | 1 | 0 | -0.614031 | -1.459413 | 0.859288  |
| 18 | 6 | 0 | -3.853435 | -0.748756 | 0.136885  |
| 19 | 1 | 0 | -4.574282 | 1.174502  | -0.576556 |
| 20 | 1 | 0 | -2.841485 | -2.485522 | 0.897214  |
| 21 | 6 | 0 | -0.000003 | 2.510490  | -0.000002 |
| 22 | 7 | 0 | 0.000013  | 3.667412  | 0.000006  |
| 23 | 8 | 0 | 5.019048  | -1.416963 | -0.199974 |
| 24 | 8 | 0 | -5.019049 | -1.416961 | 0.199974  |
| 25 | 6 | 0 | 6.203765  | -0.742676 | 0.186600  |
| 26 | 1 | 0 | 6.147829  | -0.427655 | 1.232072  |
| 27 | 1 | 0 | 7.010392  | -1.460543 | 0.063052  |
| 28 | 1 | 0 | 6.382903  | 0.125852  | -0.452854 |
| 29 | 6 | 0 | -6.203766 | -0.742673 | -0.186601 |
| 30 | 1 | 0 | -7.010394 | -1.460538 | -0.063049 |
| 31 | 1 | 0 | -6.382901 | 0.125858  | 0.452851  |
| 32 | 1 | 0 | -6.147832 | -0.427656 | -1.232073 |
| 33 | 6 | 0 | -0.000001 | 1.089220  | 0.000002  |

### 1.3.6. DAAN-SMe/OMe radical of D<sub>1</sub> state optimized with UM06-2X/6-311+G(d,p)

| Center Number | Atomic Number | Atomic Type | Coordinates (Angstroms) |           |           |
|---------------|---------------|-------------|-------------------------|-----------|-----------|
|               |               |             | X                       | Y         | Z         |
| 1             | 6             | 0           | 3.339192                | 0.795301  | 0.246834  |
| 2             | 6             | 0           | 2.087021                | 1.333475  | 0.294163  |
| 3             | 6             | 0           | 0.906959                | 0.564949  | -0.031911 |
| 4             | 6             | 0           | 1.135909                | -0.789835 | -0.464961 |
| 5             | 6             | 0           | 2.389301                | -1.323962 | -0.509173 |
| 6             | 6             | 0           | 3.534653                | -0.559219 | -0.135816 |
| 7             | 1             | 0           | 4.184518                | 1.416879  | 0.513526  |
| 8             | 1             | 0           | 1.961172                | 2.368326  | 0.588129  |
| 9             | 1             | 0           | 0.301069                | -1.381598 | -0.813968 |
| 10            | 1             | 0           | 2.526379                | -2.344220 | -0.852518 |
| 11            | 6             | 0           | -1.643102               | 0.472461  | 0.035577  |
| 12            | 6             | 0           | -2.841677               | 1.133034  | -0.358181 |
| 13            | 6             | 0           | -1.788476               | -0.860113 | 0.525374  |
| 14            | 6             | 0           | -4.072817               | 0.514691  | -0.309175 |
| 15            | 1             | 0           | -2.778054               | 2.155347  | -0.712089 |
| 16            | 6             | 0           | -3.011767               | -1.478919 | 0.575202  |
| 17            | 1             | 0           | -0.924737               | -1.380775 | 0.917321  |
| 18            | 6             | 0           | -4.173744               | -0.809309 | 0.147056  |
| 19            | 1             | 0           | -4.949370               | 1.061217  | -0.630757 |
| 20            | 1             | 0           | -3.116796               | -2.485841 | 0.961023  |
| 21            | 6             | 0           | -0.426046               | 2.581145  | -0.007114 |
| 22            | 7             | 0           | -0.452267               | 3.738256  | -0.016828 |
| 23            | 8             | 0           | -5.323521               | -1.512416 | 0.221104  |
| 24            | 6             | 0           | 6.242923                | -0.117756 | 0.328922  |
| 25            | 1             | 0           | 6.027625                | 0.223664  | 1.340746  |
| 26            | 1             | 0           | 7.218340                | -0.600493 | 0.310350  |
| 27            | 1             | 0           | 6.240242                | 0.719328  | -0.368369 |
| 28            | 6             | 0           | -6.520121               | -0.879128 | -0.190340 |
| 29            | 1             | 0           | -7.310592               | -1.612593 | -0.052391 |
| 30            | 1             | 0           | -6.727028               | 0.002541  | 0.422942  |
| 31            | 1             | 0           | -6.467611               | -0.590418 | -1.244029 |
| 32            | 6             | 0           | -0.383864               | 1.162366  | 0.005384  |
| 33            | 16            | 0           | 5.057676                | -1.378432 | -0.183875 |

### 1.3.7. DAAN-F/F radical of D<sub>1</sub> state optimized with UM06-2X/6-311+G(d,p)

| Center Number | Atomic Number | Atomic Type | Coordinates (Angstroms) |           |           |
|---------------|---------------|-------------|-------------------------|-----------|-----------|
|               |               |             | X                       | Y         | Z         |
| 1             | 6             | 0           | 3.692882                | 0.503975  | 0.359921  |
| 2             | 6             | 0           | 2.456793                | 1.082578  | 0.375819  |
| 3             | 6             | 0           | 1.271422                | 0.347969  | -0.004804 |
| 4             | 6             | 0           | 1.467034                | -1.011003 | -0.459133 |
| 5             | 6             | 0           | 2.709634                | -1.585372 | -0.477763 |
| 6             | 6             | 0           | 3.816095                | -0.836739 | -0.052447 |
| 7             | 1             | 0           | 4.580165                | 1.046861  | 0.660466  |
| 8             | 1             | 0           | 2.347810                | 2.112868  | 0.691143  |
| 9             | 1             | 0           | 0.624420                | -1.565931 | -0.847097 |
| 10            | 1             | 0           | 2.862730                | -2.597434 | -0.831351 |
| 11            | 6             | 0           | -1.271394               | 0.347948  | 0.004815  |
| 12            | 6             | 0           | -2.456776               | 1.082538  | -0.375812 |
| 13            | 6             | 0           | -1.466988               | -1.011029 | 0.459137  |
| 14            | 6             | 0           | -3.692856               | 0.503914  | -0.359921 |
| 15            | 1             | 0           | -2.347809               | 2.112830  | -0.691139 |
| 16            | 6             | 0           | -2.709578               | -1.585419 | 0.477762  |
| 17            | 1             | 0           | -0.624366               | -1.565946 | 0.847100  |
| 18            | 6             | 0           | -3.816050               | -0.836802 | 0.052443  |
| 19            | 1             | 0           | -4.580145               | 1.046786  | -0.660471 |
| 20            | 1             | 0           | -2.862659               | -2.597485 | 0.831345  |
| 21            | 6             | 0           | 0.000007                | 2.408976  | 0.000021  |
| 22            | 7             | 0           | -0.000293               | 3.563796  | -0.000023 |
| 23            | 6             | 0           | 0.000010                | 0.981988  | 0.000009  |
| 24            | 9             | 0           | 5.021980                | -1.405528 | -0.048845 |

|    |   |   |           |           |          |
|----|---|---|-----------|-----------|----------|
| 25 | 9 | 0 | -5.021925 | -1.405612 | 0.048833 |
|----|---|---|-----------|-----------|----------|

### 1.3.8. DAAN-F/OMe radical of D<sub>1</sub> state optimized with UM06-2X/6-311+G(d,p)

| Center Number | Atomic Number | Atomic Type | Coordinates (Angstroms) |           |           |
|---------------|---------------|-------------|-------------------------|-----------|-----------|
|               |               |             | X                       | Y         | Z         |
| 1             | 6             | 0           | 4.141859                | 0.404193  | -0.296062 |
| 2             | 6             | 0           | 2.920117                | 1.031279  | -0.335599 |
| 3             | 6             | 0           | 1.711868                | 0.344242  | 0.001079  |
| 4             | 6             | 0           | 1.841344                | -1.015265 | 0.423405  |
| 5             | 6             | 0           | 3.068077                | -1.643497 | 0.467071  |
| 6             | 6             | 0           | 4.205385                | -0.934882 | 0.095439  |
| 7             | 1             | 0           | 5.053932                | 0.922352  | -0.564565 |
| 8             | 1             | 0           | 2.861826                | 2.070623  | -0.635882 |
| 9             | 1             | 0           | 0.968716                | -1.554771 | 0.766022  |
| 10            | 1             | 0           | 3.166844                | -2.669866 | 0.797952  |
| 11            | 6             | 0           | -0.838347               | 0.429448  | -0.035836 |
| 12            | 6             | 0           | -2.001349               | 1.172402  | 0.411894  |
| 13            | 6             | 0           | -1.085371               | -0.889683 | -0.562634 |
| 14            | 6             | 0           | -3.262280               | 0.649819  | 0.359737  |
| 15            | 1             | 0           | -1.850974               | 2.175689  | 0.790515  |
| 16            | 6             | 0           | -2.340355               | -1.413087 | -0.601350 |
| 17            | 1             | 0           | -0.261464               | -1.451835 | -0.980535 |
| 18            | 6             | 0           | -3.462794               | -0.664038 | -0.130728 |
| 19            | 1             | 0           | -4.097834               | 1.244403  | 0.705263  |
| 20            | 1             | 0           | -2.529205               | -2.400216 | -1.006433 |
| 21            | 6             | 0           | 0.481880                | 2.450311  | -0.044486 |
| 22            | 7             | 0           | 0.481550                | 3.607515  | -0.057591 |
| 23            | 8             | 0           | -4.642997               | -1.290287 | -0.197784 |
| 24            | 6             | 0           | -5.803795               | -0.611443 | 0.259277  |
| 25            | 1             | 0           | -6.628785               | -1.303551 | 0.115725  |
| 26            | 1             | 0           | -5.710037               | -0.360489 | 1.318567  |
| 27            | 1             | 0           | -5.974340               | 0.295041  | -0.326536 |
| 28            | 6             | 0           | 0.458337                | 1.031379  | -0.025950 |
| 29            | 9             | 0           | 5.396332                | -1.549418 | 0.121530  |

### 1.3.9. DAAN-Br/OMe radical of D<sub>1</sub> state optimized with UM06-2X/6-311+G(d,p)

| Center Number | Atomic Number | Atomic Type | Coordinates (Angstroms) |           |           |
|---------------|---------------|-------------|-------------------------|-----------|-----------|
|               |               |             | X                       | Y         | Z         |
| 1             | 6             | 0           | -2.973360               | 1.148832  | -0.286949 |
| 2             | 6             | 0           | -1.684345               | 1.609643  | -0.313943 |
| 3             | 6             | 0           | -0.567258               | 0.754316  | -0.023893 |
| 4             | 6             | 0           | -0.880549               | -0.596429 | 0.351118  |
| 5             | 6             | 0           | -2.175426               | -1.054262 | 0.384986  |
| 6             | 6             | 0           | -3.231212               | -0.194458 | 0.050124  |
| 7             | 1             | 0           | -3.796852               | 1.809640  | -0.526364 |
| 8             | 1             | 0           | -1.493385               | 2.644685  | -0.571026 |
| 9             | 1             | 0           | -0.088630               | -1.261287 | 0.667923  |
| 10            | 1             | 0           | -2.387259               | -2.073345 | 0.683313  |
| 11            | 6             | 0           | 1.967621                | 0.500516  | -0.050466 |
| 12            | 6             | 0           | 3.204345                | 1.078630  | 0.420654  |
| 13            | 6             | 0           | 2.049589                | -0.829406 | -0.592139 |
| 14            | 6             | 0           | 4.389582                | 0.396054  | 0.382521  |
| 15            | 1             | 0           | 3.180889                | 2.088513  | 0.811234  |
| 16            | 6             | 0           | 3.227638                | -1.513502 | -0.620014 |
| 17            | 1             | 0           | 1.167924                | -1.273802 | -1.033319 |
| 18            | 6             | 0           | 4.425258                | -0.924790 | -0.122164 |
| 19            | 1             | 0           | 5.288692                | 0.872877  | 0.749941  |
| 20            | 1             | 0           | 3.292377                | -2.511078 | -1.037907 |
| 21            | 6             | 0           | 0.919995                | 2.678826  | -0.049313 |
| 22            | 7             | 0           | 1.070307                | 3.825562  | -0.050716 |
| 23            | 8             | 0           | 5.516968                | -1.695663 | -0.180188 |
| 24            | 6             | 0           | 6.747526                | -1.175240 | 0.301434  |
| 25            | 1             | 0           | 7.479669                | -1.965400 | 0.160498  |
| 26            | 1             | 0           | 7.041483                | -0.291569 | -0.270160 |
| 27            | 1             | 0           | 6.670766                | -0.926029 | 1.362547  |
| 28            | 6             | 0           | 0.757523                | 1.266652  | -0.045782 |
| 29            | 35            | 0           | -5.001289               | -0.834261 | 0.059509  |

### 1.3.10. DAAN-Ac/OMe radical of D<sub>1</sub> state optimized with UM06-2X/6-311+G(d,p)

| Center Number | Atomic Number | Atomic Type | Coordinates (Angstroms) |           |           |
|---------------|---------------|-------------|-------------------------|-----------|-----------|
|               |               |             | X                       | Y         | Z         |
| 1             | 6             | 0           | -3.407903               | 0.935059  | 0.244541  |
| 2             | 6             | 0           | -2.152248               | 1.458284  | 0.254596  |
| 3             | 6             | 0           | -0.987973               | 0.642297  | -0.029819 |
| 4             | 6             | 0           | -1.242245               | -0.730119 | -0.411427 |
| 5             | 6             | 0           | -2.502645               | -1.237931 | -0.429662 |
| 6             | 6             | 0           | -3.634360               | -0.438352 | -0.073191 |
| 7             | 1             | 0           | -4.247256               | 1.575623  | 0.487022  |
| 8             | 1             | 0           | -2.001152               | 2.502450  | 0.501271  |
| 9             | 1             | 0           | -0.417237               | -1.345601 | -0.744212 |
| 10            | 1             | 0           | -2.688653               | -2.260949 | -0.732788 |
| 11            | 6             | 0           | 1.547841                | 0.489950  | 0.040287  |
| 12            | 6             | 0           | 2.758045                | 1.113128  | -0.404946 |
| 13            | 6             | 0           | 1.665285                | -0.828275 | 0.587133  |
| 14            | 6             | 0           | 3.969116                | 0.468965  | -0.358019 |
| 15            | 1             | 0           | 2.706983                | 2.121352  | -0.798112 |
| 16            | 6             | 0           | 2.868637                | -1.472245 | 0.634811  |

|    |   |   |           |           |           |
|----|---|---|-----------|-----------|-----------|
| 17 | 1 | 0 | 0.793318  | -1.302011 | 1.017348  |
| 18 | 6 | 0 | 4.043268  | -0.844677 | 0.149650  |
| 19 | 1 | 0 | 4.854181  | 0.976086  | -0.717873 |
| 20 | 1 | 0 | 2.962801  | -2.463732 | 1.060703  |
| 21 | 6 | 0 | 0.406116  | 2.627246  | -0.001974 |
| 22 | 7 | 0 | 0.504582  | 3.777871  | -0.007890 |
| 23 | 8 | 0 | 5.164202  | -1.571072 | 0.226499  |
| 24 | 6 | 0 | 6.380254  | -1.001896 | -0.235890 |
| 25 | 1 | 0 | 7.141026  | -1.761938 | -0.081464 |
| 26 | 1 | 0 | 6.312225  | -0.757569 | -1.298816 |
| 27 | 1 | 0 | 6.630273  | -0.106585 | 0.338580  |
| 28 | 6 | 0 | 0.304139  | 1.203288  | 0.004806  |
| 29 | 6 | 0 | -4.965465 | -1.053186 | -0.076780 |
| 30 | 8 | 0 | -5.101114 | -2.235557 | -0.358800 |
| 31 | 6 | 0 | -6.165593 | -0.198737 | 0.273184  |
| 32 | 1 | 0 | -6.067644 | 0.215626  | 1.279662  |
| 33 | 1 | 0 | -6.263802 | 0.637583  | -0.423373 |
| 34 | 1 | 0 | -7.057455 | -0.819192 | 0.221895  |

### 1.3.11. DAAN-COOMe/OMe radical of D<sub>1</sub> state optimized with UM06-2X/6-311+G(d,p)

| Center Number | Atomic Number | Atomic Type | Coordinates (Angstroms) |           |           |
|---------------|---------------|-------------|-------------------------|-----------|-----------|
|               |               |             | X                       | Y         | Z         |
| 1             | 6             | 0           | 2.997836                | 1.052110  | -0.216065 |
| 2             | 6             | 0           | 1.724940                | 1.543028  | -0.241887 |
| 3             | 6             | 0           | 0.583856                | 0.698550  | 0.014989  |
| 4             | 6             | 0           | 0.864918                | -0.671087 | 0.370664  |
| 5             | 6             | 0           | 2.145280                | -1.147276 | 0.405593  |
| 6             | 6             | 0           | 3.241962                | -0.311086 | 0.092457  |
| 7             | 1             | 0           | 3.837367                | 1.699429  | -0.434083 |
| 8             | 1             | 0           | 1.552256                | 2.586224  | -0.477880 |
| 9             | 1             | 0           | 0.053211                | -1.320810 | 0.668279  |
| 10            | 1             | 0           | 2.349088                | -2.173271 | 0.687759  |
| 11            | 6             | 0           | -1.950711               | 0.485314  | -0.046268 |
| 12            | 6             | 0           | -3.173581               | 1.073519  | 0.436374  |
| 13            | 6             | 0           | -2.050423               | -0.827532 | -0.618711 |
| 14            | 6             | 0           | -4.370631               | 0.410720  | 0.384843  |
| 15            | 1             | 0           | -3.133487               | 2.073545  | 0.850506  |
| 16            | 6             | 0           | -3.239087               | -1.493131 | -0.662164 |
| 17            | 1             | 0           | -1.173557               | -1.274185 | -1.067223 |
| 18            | 6             | 0           | -4.425712               | -0.896371 | -0.150420 |
| 19            | 1             | 0           | -5.261986               | 0.892362  | 0.764189  |
| 20            | 1             | 0           | -3.320050               | -2.479441 | -1.102966 |
| 21            | 6             | 0           | -0.870621               | 2.647642  | -0.026740 |
| 22            | 7             | 0           | -1.015265               | 3.794242  | -0.027612 |
| 23            | 8             | 0           | -5.528630               | -1.645576 | -0.227693 |
| 24            | 6             | 0           | -6.753006               | -1.117607 | 0.264023  |
| 25            | 1             | 0           | -7.496291               | -1.892969 | 0.101770  |
| 26            | 1             | 0           | -6.674651               | -0.896260 | 1.331012  |
| 27            | 1             | 0           | -7.031226               | -0.216050 | -0.286851 |
| 28            | 6             | 0           | -0.724144               | 1.230755  | -0.023010 |
| 29            | 6             | 0           | 4.593062                | -0.890456 | 0.123302  |
| 30            | 8             | 0           | 4.837864                | -2.045754 | 0.382128  |
| 31            | 8             | 0           | 5.551321                | 0.009042  | -0.169562 |
| 32            | 6             | 0           | 6.884622                | -0.497386 | -0.151943 |
| 33            | 1             | 0           | 7.523656                | 0.344377  | -0.405370 |
| 34            | 1             | 0           | 7.130948                | -0.883502 | 0.837591  |
| 35            | 1             | 0           | 6.995773                | -1.299073 | -0.882649 |

### 1.3.12. DAAN-CN/OMe radical of D<sub>1</sub> state optimized with UM06-2X/6-311+G(d,p)

| Center Number | Atomic Number | Atomic Type | Coordinates (Angstroms) |           |           |
|---------------|---------------|-------------|-------------------------|-----------|-----------|
|               |               |             | X                       | Y         | Z         |
| 1             | 6             | 0           | 3.875515                | 0.729822  | -0.226362 |
| 2             | 6             | 0           | 2.634212                | 1.291444  | -0.261093 |
| 3             | 6             | 0           | 1.444542                | 0.516112  | -0.010014 |
| 4             | 6             | 0           | 1.644135                | -0.866248 | 0.349006  |
| 5             | 6             | 0           | 2.892617                | -1.420289 | 0.395752  |
| 6             | 6             | 0           | 4.038827                | -0.647287 | 0.088495  |
| 7             | 1             | 0           | 4.752737                | 1.327759  | -0.440344 |
| 8             | 1             | 0           | 2.526377                | 2.342776  | -0.498930 |
| 9             | 1             | 0           | 0.795250                | -1.469926 | 0.639188  |
| 10            | 1             | 0           | 3.019211                | -2.457106 | 0.682562  |
| 11            | 6             | 0           | -1.098415               | 0.446563  | -0.055045 |
| 12            | 6             | 0           | -2.272298               | 1.101185  | 0.458516  |
| 13            | 6             | 0           | -1.284431               | -0.852641 | -0.632139 |
| 14            | 6             | 0           | -3.509047               | 0.514246  | 0.420516  |
| 15            | 1             | 0           | -2.162752               | 2.092771  | 0.880490  |
| 16            | 6             | 0           | -2.511479               | -1.446490 | -0.659101 |
| 17            | 1             | 0           | -0.442947               | -1.346994 | -1.098542 |
| 18            | 6             | 0           | -3.651547               | -0.782152 | -0.124253 |
| 19            | 1             | 0           | -4.363341               | 1.045177  | -0.818771 |
| 20            | 1             | 0           | -2.659678               | -2.423311 | -1.103530 |
| 21            | 6             | 0           | 0.104544                | 2.544380  | -0.087901 |
| 22            | 7             | 0           | 0.024907                | 3.697223  | -0.112229 |
| 23            | 8             | 0           | -4.797213               | -1.461232 | -0.190236 |
| 24            | 6             | 0           | -5.982993               | -0.865010 | 0.320937  |
| 25            | 1             | 0           | -6.772560               | -1.593483 | 0.160921  |
| 26            | 1             | 0           | -5.878437               | -0.658827 | 1.388539  |
| 27            | 1             | 0           | -6.212271               | 0.056025  | -0.219827 |
| 28            | 6             | 0           | 0.171745                | 1.123146  | -0.055922 |
| 29            | 6             | 0           | 5.328710                | -1.235202 | 0.110778  |

|    |   |   |          |           |          |
|----|---|---|----------|-----------|----------|
| 30 | 7 | 0 | 6.379135 | -1.716435 | 0.129311 |
|----|---|---|----------|-----------|----------|

1.3.13. **DAAN-NO<sub>2</sub>/OMe** radical of D<sub>1</sub> state optimized with UM06-2X/6-311+G(d,p)

| Center<br>Number | Atomic<br>Number | Atomic<br>Type | Coordinates (Angstroms) |           |           |
|------------------|------------------|----------------|-------------------------|-----------|-----------|
|                  |                  |                | X                       | Y         | Z         |
| 1                | 6                | 0              | 3.419815                | 0.809585  | -0.576186 |
| 2                | 6                | 0              | 2.141292                | 1.347171  | -0.577991 |
| 3                | 6                | 0              | 1.037264                | 0.609502  | -0.125026 |
| 4                | 6                | 0              | 1.262483                | -0.699333 | 0.326228  |
| 5                | 6                | 0              | 2.537222                | -1.249147 | 0.331352  |
| 6                | 6                | 0              | 3.605398                | -0.485659 | -0.115191 |
| 7                | 1                | 0              | 4.262513                | 1.396881  | -0.912933 |
| 8                | 1                | 0              | 1.996376                | 2.364726  | -0.922330 |
| 9                | 1                | 0              | 0.440850                | -1.279699 | 0.726585  |
| 10               | 1                | 0              | 2.701049                | -2.248548 | 0.709578  |
| 11               | 6                | 0              | -1.544786               | 0.521865  | -0.081437 |
| 12               | 6                | 0              | -2.699836               | 1.087082  | 0.485990  |
| 13               | 6                | 0              | -1.677863               | -0.732452 | -0.719077 |
| 14               | 6                | 0              | -3.920528               | 0.430792  | 0.461225  |
| 15               | 1                | 0              | -2.632201               | 2.055794  | 0.968278  |
| 16               | 6                | 0              | -2.888659               | -1.386982 | -0.755919 |
| 17               | 1                | 0              | -0.823971               | -1.170465 | -1.220991 |
| 18               | 6                | 0              | -4.020648               | -0.818626 | -0.155497 |
| 19               | 1                | 0              | -4.779296               | 0.897598  | 0.923613  |
| 20               | 1                | 0              | -2.998598               | -2.340256 | -1.257743 |
| 21               | 6                | 0              | -0.321780               | 2.632840  | 0.136544  |
| 22               | 7                | 0              | -0.349003               | 3.780663  | 0.281110  |
| 23               | 8                | 0              | -5.157188               | -1.543856 | -0.233164 |
| 24               | 6                | 0              | -6.326833               | -1.011477 | 0.359283  |
| 25               | 1                | 0              | -7.110165               | -1.745508 | 0.188240  |
| 26               | 1                | 0              | -6.190282               | -0.866428 | 1.434897  |
| 27               | 1                | 0              | -6.606797               | -0.062723 | -0.107456 |
| 28               | 6                | 0              | -0.285129               | 1.230640  | -0.042093 |
| 29               | 7                | 0              | 4.953350                | -1.043939 | -0.065979 |
| 30               | 8                | 0              | 5.951700                | -0.173387 | -0.044295 |
| 31               | 8                | 0              | 5.156190                | -2.016913 | 0.808850  |

1.3.14. **DAAN-OMe/diOMe** radical of D<sub>1</sub> state optimized with UM06-2X/6-311+G(d,p)

| Center<br>Number | Atomic<br>Number | Atomic<br>Type | Coordinates (Angstroms) |           |           |
|------------------|------------------|----------------|-------------------------|-----------|-----------|
|                  |                  |                | X                       | Y         | Z         |
| 1                | 6                | 0              | -3.999202               | 0.530230  | -0.335400 |
| 2                | 6                | 0              | -2.728014               | 1.026104  | -0.527806 |
| 3                | 6                | 0              | -1.560923               | 0.306444  | -0.129192 |
| 4                | 6                | 0              | -1.789586               | -0.948115 | 0.518883  |
| 5                | 6                | 0              | -3.054646               | -1.441443 | 0.711222  |
| 6                | 6                | 0              | -4.183593               | -0.719116 | 0.279335  |
| 7                | 1                | 0              | -4.845760               | 1.115644  | -0.669555 |
| 8                | 1                | 0              | -2.603626               | 1.992290  | -1.001825 |
| 9                | 1                | 0              | -0.948587               | -1.510808 | 0.903615  |
| 10               | 1                | 0              | -3.216244               | -2.389875 | 1.209748  |
| 11               | 6                | 0              | 0.956958                | 0.096453  | -0.245625 |
| 12               | 6                | 0              | 2.215618                | 0.677407  | 0.221985  |
| 13               | 6                | 0              | 1.036949                | -1.257513 | -0.672070 |
| 14               | 6                | 0              | 3.417997                | -0.019672 | 0.198821  |
| 15               | 6                | 0              | 2.214644                | -1.956384 | -0.664186 |
| 16               | 1                | 0              | 0.141783                | -1.726521 | -1.058897 |
| 17               | 6                | 0              | 3.426338                | -1.342838 | -0.238279 |
| 18               | 1                | 0              | 4.322962                | 0.455246  | 0.546555  |
| 19               | 1                | 0              | 2.263460                | -2.983966 | -1.003918 |
| 20               | 6                | 0              | -0.172874               | 2.232697  | -0.659810 |
| 21               | 7                | 0              | -0.149936               | 3.346190  | -0.977520 |
| 22               | 8                | 0              | -5.383956               | -1.302411 | 0.501641  |
| 23               | 8                | 0              | 4.516124                | -2.130941 | -0.292076 |
| 24               | 6                | 0              | -6.544248               | -0.608925 | 0.087862  |
| 25               | 1                | 0              | -6.537949               | -0.444237 | -0.993699 |
| 26               | 1                | 0              | -7.385815               | -1.243715 | 0.354449  |
| 27               | 1                | 0              | -6.632172               | 0.351592  | 0.604111  |
| 28               | 6                | 0              | 5.754487                | -1.586956 | 0.124643  |
| 29               | 1                | 0              | 6.489391                | -2.376785 | -0.006465 |
| 30               | 1                | 0              | 6.026353                | -0.724877 | -0.491298 |
| 31               | 1                | 0              | 5.714650                | -1.292795 | 1.177409  |
| 32               | 6                | 0              | -0.252510               | 0.862243  | -0.311921 |
| 33               | 8                | 0              | 2.094095                | 1.920993  | 0.678022  |
| 34               | 6                | 0              | 3.243846                | 2.640304  | 1.079276  |
| 35               | 1                | 0              | 3.721360                | 2.160183  | 1.938700  |
| 36               | 1                | 0              | 3.953411                | 2.719421  | 0.251248  |
| 37               | 1                | 0              | 2.888789                | 3.629230  | 1.355336  |

1.3.15. **DAAN-OMe/triOMe** radical of D<sub>1</sub> state optimized with UM06-2X/6-311+G(d,p)

| Center<br>Number | Atomic<br>Number | Atomic<br>Type | Coordinates (Angstroms) |           |           |
|------------------|------------------|----------------|-------------------------|-----------|-----------|
|                  |                  |                | X                       | Y         | Z         |
| 1                | 6                | 0              | -3.979248               | 0.720341  | 0.175414  |
| 2                | 6                | 0              | -2.743065               | 1.194878  | 0.540011  |
| 3                | 6                | 0              | -1.529748               | 0.536112  | 0.153944  |
| 4                | 6                | 0              | -1.682054               | -0.621641 | -0.686424 |

|    |   |   |           |           |           |
|----|---|---|-----------|-----------|-----------|
| 5  | 6 | 0 | -2.915113 | -1.088587 | -1.052603 |
| 6  | 6 | 0 | -4.090074 | -0.438960 | -0.621452 |
| 7  | 1 | 0 | -4.863003 | 1.248077  | 0.510031  |
| 8  | 1 | 0 | -2.672664 | 2.089327  | 1.146936  |
| 9  | 1 | 0 | -0.798181 | -1.121160 | -1.063222 |
| 10 | 1 | 0 | -3.019687 | -1.960842 | -1.687158 |
| 11 | 6 | 0 | 0.978096  | 0.351382  | 0.322491  |
| 12 | 6 | 0 | 2.165463  | 0.982517  | -0.199903 |
| 13 | 6 | 0 | 1.113397  | -1.044783 | 0.656178  |
| 14 | 6 | 0 | 3.341921  | 0.284004  | -0.422627 |
| 15 | 6 | 0 | 2.258847  | -1.758496 | 0.379499  |
| 16 | 6 | 0 | 3.375901  | -1.091215 | -0.153829 |
| 17 | 1 | 0 | 4.204548  | 0.787520  | -0.829961 |
| 18 | 1 | 0 | 2.362390  | -2.808971 | 0.610293  |
| 19 | 6 | 0 | -0.208545 | 2.366556  | 1.061625  |
| 20 | 7 | 0 | -0.217167 | 3.426940  | 1.528824  |
| 21 | 8 | 0 | -5.257619 | -0.992076 | -1.019445 |
| 22 | 8 | 0 | 4.458071  | -1.866498 | -0.357642 |
| 23 | 6 | 0 | -6.462046 | -0.370354 | -0.615693 |
| 24 | 1 | 0 | -6.524585 | 0.650798  | -1.002261 |
| 25 | 1 | 0 | -7.265717 | -0.969253 | -1.037173 |
| 26 | 1 | 0 | -6.549002 | -0.355666 | 0.474633  |
| 27 | 6 | 0 | 5.634976  | -1.268294 | -0.869360 |
| 28 | 1 | 0 | 6.367993  | -2.067594 | -0.941985 |
| 29 | 1 | 0 | 5.457694  | -0.843458 | -1.861238 |
| 30 | 1 | 0 | 6.004411  | -0.492486 | -0.193101 |
| 31 | 6 | 0 | -0.253437 | 1.059965  | 0.524293  |
| 32 | 8 | 0 | 2.011243  | 2.280178  | -0.478349 |
| 33 | 6 | 0 | 3.118396  | 3.022696  | -0.944690 |
| 34 | 1 | 0 | 3.937035  | 2.993477  | -0.219675 |
| 35 | 1 | 0 | 3.463734  | 2.644291  | -1.912053 |
| 36 | 1 | 0 | 2.762524  | 4.043625  | -1.053510 |
| 37 | 8 | 0 | 0.034095  | -1.565633 | 1.260896  |
| 38 | 6 | 0 | 0.002037  | -2.959428 | 1.493111  |
| 39 | 1 | 0 | 0.116466  | -3.511342 | 0.554879  |
| 40 | 1 | 0 | 0.788772  | -3.256286 | 2.193166  |
| 41 | 1 | 0 | -0.973087 | -3.166578 | 1.926411  |

1.3.16. **DAAN-diOMe/diOMe** radical of D<sub>1</sub> state optimized with UM06-2X/6-311+G(d,p)

| Center<br>Number | Atomic<br>Number | Atomic<br>Type | Coordinates (Angstroms) |           |           |
|------------------|------------------|----------------|-------------------------|-----------|-----------|
|                  |                  |                | X                       | Y         | Z         |
| 1                | 6                | 0              | -3.720003               | -0.062126 | -0.154614 |
| 2                | 6                | 0              | -2.506271               | 0.584637  | -0.358024 |
| 3                | 6                | 0              | -1.245217               | 0.040937  | -0.113583 |
| 4                | 6                | 0              | -1.335884               | -1.232227 | 0.744463  |
| 5                | 6                | 0              | -2.527165               | -1.884936 | 0.924226  |
| 6                | 6                | 0              | -3.739919               | -1.300925 | 0.487216  |
| 7                | 1                | 0              | -4.632229               | 0.384825  | -0.519876 |
| 8                | 1                | 0              | -0.427396               | -1.676139 | 1.131726  |
| 9                | 1                | 0              | -2.574779               | -2.846342 | 1.420847  |
| 10               | 6                | 0              | 1.245215                | 0.040934  | -0.113567 |
| 11               | 6                | 0              | 2.506271                | 0.584626  | 0.358061  |
| 12               | 6                | 0              | 1.335885                | -1.232226 | -0.744457 |
| 13               | 6                | 0              | 3.720007                | -0.062123 | 0.154628  |
| 14               | 6                | 0              | 2.527169                | -1.884922 | -0.924236 |
| 15               | 1                | 0              | 0.427396                | -1.676137 | -1.131720 |
| 16               | 6                | 0              | 3.739926                | -1.300907 | -0.487227 |
| 17               | 1                | 0              | 4.632231                | 0.384823  | 0.519901  |
| 18               | 1                | 0              | 2.574788                | -2.846322 | -1.420869 |
| 19               | 6                | 0              | 0.000006                | 2.164579  | -0.000056 |
| 20               | 7                | 0              | -0.000022               | 3.321780  | -0.000111 |
| 21               | 8                | 0              | -4.855742               | -2.024392 | 0.726971  |
| 22               | 8                | 0              | 4.855748                | -2.024364 | -0.727007 |
| 23               | 6                | 0              | -6.095348               | -1.493326 | 0.304694  |
| 24               | 1                | 0              | -6.116178               | -1.364549 | -0.781764 |
| 25               | 1                | 0              | -6.850269               | -2.218063 | 0.599278  |
| 26               | 1                | 0              | -6.296970               | -0.535071 | 0.792885  |
| 27               | 6                | 0              | 6.095357                | -1.493299 | -0.304735 |
| 28               | 1                | 0              | 6.850279                | -2.218025 | -0.599347 |
| 29               | 1                | 0              | 6.296965                | -0.535031 | -0.792908 |
| 30               | 1                | 0              | 6.116201                | -1.364546 | 0.781724  |
| 31               | 6                | 0              | -0.000001               | 0.744161  | 0.000001  |
| 32               | 8                | 0              | -2.394492               | 1.735077  | -1.028426 |
| 33               | 8                | 0              | 2.394487                | 1.735035  | 1.028510  |
| 34               | 6                | 0              | -3.555194               | 2.415768  | -1.454005 |
| 35               | 1                | 0              | -4.106974               | 1.825802  | -2.192851 |
| 36               | 1                | 0              | -4.202634               | 2.645199  | -0.602643 |
| 37               | 1                | 0              | -3.203765               | 3.339634  | -1.905914 |
| 38               | 6                | 0              | 3.555187                | 2.415729  | 1.454091  |
| 39               | 1                | 0              | 4.106985                | 1.825749  | 2.192913  |
| 40               | 1                | 0              | 4.202610                | 2.645190  | 0.602724  |
| 41               | 1                | 0              | 3.203753                | 3.339579  | 1.906030  |

1.3.17. **DAAN-diOMe/triOMe** radical of D<sub>1</sub> state optimized with UM06-2X/6-311+G(d,p)

| Center<br>Number | Atomic<br>Number | Atomic<br>Type | Coordinates (Angstroms) |          |           |
|------------------|------------------|----------------|-------------------------|----------|-----------|
|                  |                  |                | X                       | Y        | Z         |
| 1                | 6                | 0              | -3.732106               | 0.074011 | -0.031976 |
| 2                | 6                | 0              | -2.545644               | 0.688302 | 0.348746  |
| 3                | 6                | 0              | -1.243103               | 0.276267 | -0.172784 |

|    |   |   |           |           |           |
|----|---|---|-----------|-----------|-----------|
| 4  | 6 | 0 | -1.265729 | -0.867515 | -1.022078 |
| 5  | 6 | 0 | -2.429154 | -1.499013 | -1.364274 |
| 6  | 6 | 0 | -3.684253 | -1.021752 | -0.893482 |
| 7  | 1 | 0 | -4.672072 | 0.426481  | 0.365297  |
| 8  | 1 | 0 | -0.321672 | -1.220845 | -1.419562 |
| 9  | 1 | 0 | -2.431868 | -2.367327 | -2.012319 |
| 10 | 6 | 0 | 1.245816  | 0.313707  | 0.133122  |
| 11 | 6 | 0 | 2.444390  | 0.896271  | -0.373304 |
| 12 | 6 | 0 | 1.384851  | -0.997693 | 0.683013  |
| 13 | 6 | 0 | 3.663928  | 0.224218  | -0.366122 |
| 14 | 6 | 0 | 2.578549  | -1.695869 | 0.653634  |
| 15 | 6 | 0 | 3.720448  | -1.077143 | 0.136014  |
| 16 | 1 | 0 | 4.543000  | 0.696878  | -0.775121 |
| 17 | 1 | 0 | 2.681989  | -2.690184 | 1.063198  |
| 18 | 6 | 0 | -0.093819 | 2.391055  | 0.276518  |
| 19 | 7 | 0 | -0.173498 | 3.540585  | 0.402192  |
| 20 | 8 | 0 | -4.760145 | -1.711923 | -1.324908 |
| 21 | 8 | 0 | 4.852218  | -1.823340 | 0.173885  |
| 22 | 6 | 0 | -6.037587 | -1.294540 | -0.885051 |
| 23 | 1 | 0 | -6.239387 | -0.265449 | -1.196627 |
| 24 | 1 | 0 | -6.752492 | -1.965441 | -1.354537 |
| 25 | 1 | 0 | -6.120164 | -1.373474 | 0.203040  |
| 26 | 6 | 0 | 6.046727  | -1.245625 | -0.309687 |
| 27 | 1 | 0 | 6.820359  | -1.998057 | -0.175500 |
| 28 | 1 | 0 | 5.962599  | -0.996121 | -1.371853 |
| 29 | 1 | 0 | 6.308755  | -0.347979 | 0.258546  |
| 30 | 6 | 0 | -0.030579 | 0.987395  | 0.121195  |
| 31 | 8 | 0 | 2.293305  | 2.123411  | -0.901547 |
| 32 | 6 | 0 | 3.428184  | 2.826593  | -1.352974 |
| 33 | 1 | 0 | 4.158714  | 2.950056  | -0.547558 |
| 34 | 1 | 0 | 3.897361  | 2.318823  | -2.202323 |
| 35 | 1 | 0 | 3.063987  | 3.802103  | -1.665779 |
| 36 | 8 | 0 | 0.257217  | -1.493046 | 1.243248  |
| 37 | 6 | 0 | 0.247557  | -2.844993 | 1.648386  |
| 38 | 1 | 0 | 0.502216  | -3.506106 | 0.814063  |
| 39 | 1 | 0 | 0.945861  | -3.012899 | 2.474001  |
| 40 | 1 | 0 | -0.766844 | -3.050222 | 1.983467  |
| 41 | 8 | 0 | -2.478405 | 1.686081  | 1.227246  |
| 42 | 6 | 0 | -3.667080 | 2.254833  | 1.735569  |
| 43 | 1 | 0 | -4.284820 | 2.642527  | 0.920563  |
| 44 | 1 | 0 | -4.233063 | 1.519991  | 2.316706  |
| 45 | 1 | 0 | -3.349861 | 3.072643  | 2.376769  |

1.3.18. **DAAN-triOMe/triOMe** radical of D<sub>1</sub> state optimized with UM06-2X/6-311+G(d,p)

| Center Number | Atomic Number | Atomic Type | Coordinates (Angstroms) |           |           |
|---------------|---------------|-------------|-------------------------|-----------|-----------|
|               |               |             | X                       | Y         | Z         |
| 1             | 6             | 0           | -3.673887               | 0.255501  | -0.131838 |
| 2             | 6             | 0           | -2.504278               | 0.980970  | -0.298543 |
| 3             | 6             | 0           | -1.237528               | 0.524022  | 0.200405  |
| 4             | 6             | 0           | -1.278779               | -0.721764 | 0.924027  |
| 5             | 6             | 0           | -2.427244               | -1.478062 | 1.044316  |
| 6             | 6             | 0           | -3.629282               | -0.982341 | 0.527355  |
| 7             | 1             | 0           | -4.601136               | 0.627723  | -0.538893 |
| 8             | 1             | 0           | -2.452094               | -2.418824 | 1.575382  |
| 9             | 6             | 0           | 1.237512                | 0.524029  | -0.200374 |
| 10            | 6             | 0           | 2.504256                | 0.980961  | 0.298653  |
| 11            | 6             | 0           | 1.278796                | -0.721739 | -0.924054 |
| 12            | 6             | 0           | 3.673879                | 0.255531  | 0.131913  |
| 13            | 6             | 0           | 2.427276                | -1.478000 | -1.044360 |
| 14            | 6             | 0           | 3.629304                | -0.982273 | -0.527360 |
| 15            | 1             | 0           | 4.601117                | 0.627740  | 0.539007  |
| 16            | 1             | 0           | 2.452157                | -2.418741 | -1.575462 |
| 17            | 6             | 0           | -0.000005               | 2.641294  | -0.000132 |
| 18            | 7             | 0           | -0.000028               | 3.799684  | -0.000326 |
| 19            | 8             | 0           | -4.714414               | -1.768379 | 0.722897  |
| 20            | 8             | 0           | 4.714446                | -1.768277 | -0.722934 |
| 21            | 6             | 0           | -5.967931               | -1.310130 | 0.257918  |
| 22            | 1             | 0           | -5.964463               | -1.187919 | -0.829340 |
| 23            | 1             | 0           | -6.688142               | -2.076949 | 0.533062  |
| 24            | 1             | 0           | -6.242276               | -0.364212 | 0.734019  |
| 25            | 6             | 0           | 5.967955                | -1.310045 | -0.257908 |
| 26            | 1             | 0           | 6.688175                | -2.076841 | -0.533093 |
| 27            | 1             | 0           | 6.242295                | -0.364095 | -0.733947 |
| 28            | 1             | 0           | 5.964469                | -1.187905 | 0.829357  |
| 29            | 6             | 0           | -0.000014               | 1.225906  | -0.000003 |
| 30            | 8             | 0           | 2.441630                | 2.132260  | 0.982530  |
| 31            | 8             | 0           | 0.094224                | -1.078931 | -1.460309 |
| 32            | 8             | 0           | -0.094199               | -1.078956 | 1.460291  |
| 33            | 8             | 0           | -2.441692               | 2.132338  | -0.982325 |
| 34            | 6             | 0           | 3.632002                | 2.713998  | 1.462568  |
| 35            | 1             | 0           | 4.111859                | 2.071942  | 2.208965  |
| 36            | 1             | 0           | 4.328926                | 2.910400  | 0.641781  |
| 37            | 1             | 0           | 3.335769                | 3.653644  | 1.921854  |
| 38            | 6             | 0           | -0.027522               | -2.368106 | -2.023246 |
| 39            | 1             | 0           | 0.595587                | -2.463658 | -2.917732 |
| 40            | 1             | 0           | 0.254781                | -3.138801 | -1.299191 |
| 41            | 1             | 0           | -1.075754               | -2.479541 | -2.291718 |
| 42            | 6             | 0           | 0.027598                | -2.368186 | 2.023089  |
| 43            | 1             | 0           | -0.595495               | -2.463856 | 2.917574  |
| 44            | 1             | 0           | -0.254689               | -3.138814 | 1.298957  |
| 45            | 1             | 0           | 1.075837                | -2.479615 | 2.291538  |
| 46            | 6             | 0           | -3.632084               | 2.714078  | -1.462305 |
| 47            | 1             | 0           | -4.111929               | 2.072069  | -2.208751 |
| 48            | 1             | 0           | -4.329011               | 2.910396  | -0.641500 |

|    |   |   |           |          |           |
|----|---|---|-----------|----------|-----------|
| 49 | 1 | 0 | -3.335883 | 3.653769 | -1.921521 |
|----|---|---|-----------|----------|-----------|

1.3.19. **DAAN-OMe/diOMe-m** radical of D<sub>1</sub> state optimized with UM06-2X/6-311+G(d,p)

| Center Number | Atomic Number | Atomic Type | Coordinates (Angstroms) |           |           |
|---------------|---------------|-------------|-------------------------|-----------|-----------|
|               |               |             | X                       | Y         | Z         |
| 1             | 6             | 0           | -4.189211               | 0.647708  | -0.399668 |
| 2             | 6             | 0           | -2.890652               | 1.106849  | -0.506392 |
| 3             | 6             | 0           | -1.780923               | 0.363295  | -0.026598 |
| 4             | 6             | 0           | -2.080557               | -0.879003 | 0.599942  |
| 5             | 6             | 0           | -3.370561               | -1.340623 | 0.709099  |
| 6             | 6             | 0           | -4.444875               | -0.591832 | 0.201315  |
| 7             | 1             | 0           | -4.994969               | 1.255229  | -0.789754 |
| 8             | 1             | 0           | -2.709270               | 2.069051  | -0.971316 |
| 9             | 1             | 0           | -1.284587               | -1.456583 | 1.052167  |
| 10            | 1             | 0           | -3.589972               | -2.281696 | 1.199068  |
| 11            | 6             | 0           | 0.772570                | 0.162215  | -0.079992 |
| 12            | 6             | 0           | 2.004310                | 0.826251  | 0.152587  |
| 13            | 6             | 0           | 0.846943                | -1.269546 | -0.341906 |
| 14            | 6             | 0           | 3.208043                | 0.154334  | 0.143665  |
| 15            | 1             | 0           | 1.981680                | 1.887741  | 0.353256  |
| 16            | 6             | 0           | 2.038658                | -1.933977 | -0.351871 |
| 17            | 1             | 0           | -0.056705               | -1.804908 | -0.594043 |
| 18            | 6             | 0           | 3.260042                | -1.269369 | -0.131619 |
| 19            | 1             | 0           | 2.085457                | -2.994759 | -0.566505 |
| 20            | 6             | 0           | -0.319860               | 2.303870  | -0.269505 |
| 21            | 7             | 0           | -0.183256               | 3.447929  | -0.393028 |
| 22            | 8             | 0           | -5.672726               | -1.142604 | 0.341976  |
| 23            | 8             | 0           | 4.369346                | -2.020696 | -0.102480 |
| 24            | 6             | 0           | -6.782309               | -0.423307 | -0.157755 |
| 25            | 1             | 0           | -6.694139               | -0.265296 | -1.236764 |
| 26            | 1             | 0           | -7.656343               | -1.035847 | 0.049942  |
| 27            | 1             | 0           | -6.884149               | 0.542108  | 0.346769  |
| 28            | 6             | 0           | 5.643240                | -1.503133 | -0.489119 |
| 29            | 1             | 0           | 6.227928                | -2.372661 | -0.781951 |
| 30            | 1             | 0           | 5.538455                | -0.818711 | -1.332282 |
| 31            | 1             | 0           | 6.121133                | -0.990054 | 0.343635  |
| 32            | 6             | 0           | -0.448431               | 0.902966  | -0.111257 |
| 33            | 8             | 0           | 4.383618                | 0.727645  | 0.414047  |
| 34            | 6             | 0           | 4.409821                | 2.116621  | 0.729391  |
| 35            | 1             | 0           | 3.818571                | 2.314190  | 1.625690  |
| 36            | 1             | 0           | 5.454192                | 2.356335  | 0.909056  |
| 37            | 1             | 0           | 4.026126                | 2.705687  | -0.106022 |

1.3.20. **DAAN-diOMe-m/diOMe-m** radical of D<sub>1</sub> state optimized with UM06-2X/6-311+G(d,p)

| Center Number | Atomic Number | Atomic Type | Coordinates (Angstroms) |           |           |
|---------------|---------------|-------------|-------------------------|-----------|-----------|
|               |               |             | X                       | Y         | Z         |
| 1             | 6             | 0           | -3.709372               | 0.212388  | -0.207797 |
| 2             | 6             | 0           | -2.448037               | 0.756285  | -0.285432 |
| 3             | 6             | 0           | -1.280610               | 0.008065  | 0.032639  |
| 4             | 6             | 0           | -1.486583               | -1.358385 | 0.441608  |
| 5             | 6             | 0           | -2.746834               | -1.894086 | 0.531339  |
| 6             | 6             | 0           | -3.890324               | -1.144871 | 0.229893  |
| 7             | 1             | 0           | -2.322302               | 1.779111  | -0.611404 |
| 8             | 1             | 0           | -0.644596               | -1.955511 | 0.758787  |
| 9             | 1             | 0           | -2.896271               | -2.914060 | 0.864530  |
| 10            | 6             | 0           | 1.280583                | 0.008027  | -0.032645 |
| 11            | 6             | 0           | 2.448033                | 0.756197  | 0.285469  |
| 12            | 6             | 0           | 1.486517                | -1.358403 | -0.441718 |
| 13            | 6             | 0           | 3.709353                | 0.212266  | 0.207793  |
| 14            | 1             | 0           | 2.322328                | 1.779014  | 0.611479  |
| 15            | 6             | 0           | 2.746754                | -1.894131 | -0.531490 |
| 16            | 1             | 0           | 0.644514                | -1.955484 | -0.758938 |
| 17            | 6             | 0           | 3.890254                | -1.144961 | -0.229968 |
| 18            | 1             | 0           | 2.896168                | -2.914085 | -0.864751 |
| 19            | 6             | 0           | 0.000023                | 2.061013  | 0.000068  |
| 20            | 7             | 0           | 0.000042                | 3.219348  | 0.000110  |
| 21            | 8             | 0           | -5.078133               | -1.773722 | 0.291602  |
| 22            | 8             | 0           | 5.078082                | -1.773755 | -0.291682 |
| 23            | 6             | 0           | -6.247086               | -1.082683 | 0.734123  |
| 24            | 1             | 0           | -6.740666               | -0.582847 | -0.097312 |
| 25            | 1             | 0           | -6.896280               | -1.849733 | 1.152582  |
| 26            | 1             | 0           | -5.991657               | -0.350672 | 1.502416  |
| 27            | 6             | 0           | 6.246990                | -1.082439 | -0.733869 |
| 28            | 1             | 0           | 6.896389                | -1.849284 | -1.152386 |
| 29            | 1             | 0           | 5.991553                | -0.350304 | -1.502043 |
| 30            | 1             | 0           | 6.740332                | -0.582690 | 0.097763  |
| 31            | 6             | 0           | -0.000003               | 0.642885  | 0.000016  |
| 32            | 8             | 0           | 4.834929                | 0.863241  | 0.556797  |
| 33            | 6             | 0           | 4.718126                | 2.198819  | 1.024729  |
| 34            | 1             | 0           | 4.110795                | 2.237232  | 1.932223  |
| 35            | 1             | 0           | 5.731615                | 2.525434  | 1.243135  |
| 36            | 1             | 0           | 4.275885                | 2.840688  | 0.258961  |
| 37            | 8             | 0           | -4.834872               | 0.863450  | -0.556879 |
| 38            | 6             | 0           | -4.717896               | 2.199026  | -1.024774 |
| 39            | 1             | 0           | -5.731333               | 2.525751  | -1.243260 |
| 40            | 1             | 0           | -4.275653               | 2.840831  | -0.258955 |
| 41            | 1             | 0           | -4.110484               | 2.237396  | -1.932216 |

1.4. DAAN geometries of  $S_0$  state optimized with UCAM-B3LYP/6-311+G(d,p)

1.4.1. DAAN-H/H of  $S_0$  state optimized with UCAM-B3LYP/6-311+G(d,p)

| Center Number | Atomic Number | Atomic Type | Coordinates (Angstroms) |           |           | Z |
|---------------|---------------|-------------|-------------------------|-----------|-----------|---|
|               |               |             | X                       | Y         |           |   |
| 1             | 6             | 0           | 2.599511                | -0.706198 | 1.539434  |   |
| 2             | 6             | 0           | 1.450867                | -0.068592 | 1.099877  |   |
| 3             | 6             | 0           | 1.268907                | 0.194121  | -0.254643 |   |
| 4             | 6             | 0           | 2.249469                | -0.189276 | -1.159841 |   |
| 5             | 6             | 0           | 3.400695                | -0.832299 | -0.720466 |   |
| 6             | 6             | 0           | 3.577419                | -1.091354 | 0.629569  |   |
| 7             | 1             | 0           | 2.733166                | -0.904513 | 2.596011  |   |
| 8             | 1             | 0           | 0.688701                | 0.225002  | 1.812593  |   |
| 9             | 1             | 0           | 2.118567                | 0.017540  | -2.216480 |   |
| 10            | 1             | 0           | 4.158538                | -1.127540 | -1.436060 |   |
| 11            | 6             | 0           | -1.275077               | 0.159977  | -0.355737 |   |
| 12            | 6             | 0           | -2.239045               | 0.717810  | 0.472970  |   |
| 13            | 6             | 0           | -1.472933               | -1.124477 | -0.858964 |   |
| 14            | 6             | 0           | -3.384951               | -0.000279 | 0.798498  |   |
| 15            | 1             | 0           | -2.104542               | 1.719122  | 0.864183  |   |
| 16            | 6             | 0           | -2.615629               | -1.837598 | -0.537855 |   |
| 17            | 1             | 0           | -0.721483               | -1.571888 | -1.500214 |   |
| 18            | 6             | 0           | -3.576778               | -1.276562 | 0.295417  |   |
| 19            | 1             | 0           | -4.128993               | 0.447088  | 1.446485  |   |
| 20            | 1             | 0           | -2.757443               | -2.834496 | -0.937639 |   |
| 21            | 6             | 0           | 0.000772                | 2.293834  | -0.303730 |   |
| 22            | 7             | 0           | 0.004388                | 3.387682  | 0.041614  |   |
| 23            | 1             | 0           | 4.474355                | -1.590989 | 0.974969  |   |
| 24            | 1             | 0           | -4.470608               | -1.834001 | 0.547907  |   |
| 25            | 6             | 0           | 0.005051                | 0.896098  | -0.745368 |   |
| 26            | 1             | 0           | 0.049353                | 0.929672  | -1.838021 |   |

1.4.2. DAAN-H/Me of  $S_0$  state optimized with UCAM-B3LYP/6-311+G(d,p)

| Center Number | Atomic Number | Atomic Type | Coordinates (Angstroms) |           |           | Z |
|---------------|---------------|-------------|-------------------------|-----------|-----------|---|
|               |               |             | X                       | Y         |           |   |
| 1             | 6             | 0           | -2.992561               | 0.557349  | 0.660955  |   |
| 2             | 6             | 0           | -3.369732               | -0.647793 | 0.085347  |   |
| 3             | 6             | 0           | -2.451646               | -1.286708 | -0.750527 |   |
| 4             | 6             | 0           | -1.206582               | -0.738355 | -0.995360 |   |
| 5             | 6             | 0           | -0.836275               | 0.473527  | -0.413730 |   |
| 6             | 6             | 0           | -1.741902               | 1.116305  | 0.415229  |   |
| 7             | 1             | 0           | -3.684390               | 1.078015  | 1.313691  |   |
| 8             | 1             | 0           | -2.718539               | -2.230171 | -1.214812 |   |
| 9             | 1             | 0           | -0.508191               | -1.261566 | -1.639501 |   |
| 10            | 1             | 0           | -1.482670               | 2.063547  | 0.873080  |   |
| 11            | 6             | 0           | 0.551733                | 1.030110  | -0.719301 |   |
| 12            | 1             | 0           | 0.644282                | 1.118672  | -1.805960 |   |
| 13            | 6             | 0           | 1.679744                | 0.122562  | -0.234326 |   |
| 14            | 6             | 0           | 2.634585                | -0.342015 | -1.128945 |   |
| 15            | 6             | 0           | 1.762897                | -0.247801 | 1.104619  |   |
| 16            | 6             | 0           | 3.662116                | -1.171295 | -0.694896 |   |
| 17            | 1             | 0           | 2.580742                | -0.053289 | -2.173053 |   |
| 18            | 6             | 0           | 2.788811                | -1.071031 | 1.539348  |   |
| 19            | 1             | 0           | 1.019113                | 0.107840  | 1.808407  |   |
| 20            | 6             | 0           | 3.740983                | -1.536536 | 0.639770  |   |
| 21            | 1             | 0           | 4.400688                | -1.528396 | -1.402427 |   |
| 22            | 1             | 0           | 2.846430                | -1.351872 | 2.584055  |   |
| 23            | 6             | 0           | 0.735154                | 2.385920  | -0.192795 |   |
| 24            | 7             | 0           | 0.885448                | 3.445981  | 0.218946  |   |
| 25            | 6             | 0           | -4.724123               | -1.251856 | 0.340018  |   |
| 26            | 1             | 0           | -5.310907               | -1.302330 | -0.580723 |   |
| 27            | 1             | 0           | -4.635767               | -2.269948 | 0.726389  |   |
| 28            | 1             | 0           | -5.289771               | -0.665265 | 1.064611  |   |
| 29            | 1             | 0           | 4.541638                | -2.181403 | 0.981183  |   |

1.4.3. DAAN-H/OMe of  $S_0$  state optimized with UCAM-B3LYP/6-311+G(d,p)

| Center Number | Atomic Number | Atomic Type | Coordinates (Angstroms) |           |           | Z |
|---------------|---------------|-------------|-------------------------|-----------|-----------|---|
|               |               |             | X                       | Y         |           |   |
| 1             | 6             | 0           | -3.901838               | -0.761542 | -1.022333 |   |
| 2             | 6             | 0           | -2.970387               | 0.241237  | -0.772399 |   |
| 3             | 6             | 0           | -2.058679               | 0.107745  | 0.266076  |   |
| 4             | 6             | 0           | -2.092704               | -1.040712 | 1.055356  |   |
| 5             | 6             | 0           | -3.022671               | -2.036779 | 0.809372  |   |
| 6             | 6             | 0           | -3.931445               | -1.900472 | -0.234354 |   |
| 7             | 1             | 0           | -4.607122               | -0.644129 | -1.836323 |   |
| 8             | 1             | 0           | -2.963461               | 1.132387  | -1.388624 |   |
| 9             | 1             | 0           | -1.378377               | -1.157864 | 1.862929  |   |
| 10            | 1             | 0           | -3.039273               | -2.922884 | 1.432643  |   |
| 11            | 6             | 0           | 0.422487                | 0.668999  | 0.426868  |   |
| 12            | 6             | 0           | 0.850964                | 0.098301  | -0.762245 |   |
| 13            | 6             | 0           | 1.332075                | 0.784388  | 1.474908  |   |
| 14            | 6             | 0           | 2.155823                | -0.351083 | -0.915785 |   |
| 15            | 1             | 0           | 0.159010                | -0.005421 | -1.590349 |   |
| 16            | 6             | 0           | 2.633576                | 0.338635  | 1.340415  |   |
| 17            | 1             | 0           | 1.020931                | 1.232657  | 2.412391  |   |
| 18            | 6             | 0           | 3.054307                | -0.231591 | 0.141191  |   |
| 19            | 1             | 0           | 2.456032                | -0.789714 | -1.856863 |   |
| 20            | 1             | 0           | 3.344807                | 0.424247  | 2.152009  |   |
| 21            | 6             | 0           | -1.206481               | 2.397920  | -0.190538 |   |
| 22            | 7             | 0           | -1.351159               | 3.359450  | -0.799232 |   |

|    |   |   |           |           |           |  |
|----|---|---|-----------|-----------|-----------|--|
| 23 | 8 | 0 | 4.347042  | -0.639936 | 0.097524  |  |
| 24 | 6 | 0 | 4.835574  | -1.211574 | -1.099854 |  |
| 25 | 1 | 0 | 5.879277  | -1.453198 | -0.912533 |  |
| 26 | 1 | 0 | 4.293121  | -2.127027 | -1.354815 |  |
| 27 | 1 | 0 | 4.772010  | -0.505292 | -1.933047 |  |
| 28 | 1 | 0 | -4.658838 | -2.679526 | -0.428161 |  |
| 29 | 6 | 0 | -1.009684 | 1.170009  | 0.586824  |  |
| 30 | 1 | 0 | -1.141840 | 1.458228  | 1.634165  |  |

1.4.4. DAAN-Me/OMe of  $S_0$  state optimized with UCAM-B3LYP/6-311+G(d,p)

| Center Number | Atomic Number | Atomic Type | Coordinates (Angstroms) |           |           | Z |
|---------------|---------------|-------------|-------------------------|-----------|-----------|---|
|               |               |             | X                       | Y         |           |   |
| 1             | 6             | 0           | -3.647286               | -0.113794 | -0.897341 |   |
| 2             | 6             | 0           | -2.582582               | 0.764416  | -0.717030 |   |
| 3             | 6             | 0           | -1.668636               | 0.560162  | 0.304568  |   |
| 4             | 6             | 0           | -1.841908               | -0.538965 | 1.144956  |   |
| 5             | 6             | 0           | -2.903712               | -1.405351 | 0.963800  |   |
| 6             | 6             | 0           | -3.828260               | -1.208652 | -0.064048 |   |
| 7             | 1             | 0           | -4.348752               | 0.065674  | -1.704578 |   |
| 8             | 1             | 0           | -2.475708               | 1.614960  | -1.379803 |   |
| 9             | 1             | 0           | -1.130751               | -0.722122 | 1.943131  |   |
| 10            | 1             | 0           | -3.018917               | -2.253189 | 1.630798  |   |
| 11            | 6             | 0           | 0.869309                | 0.782373  | 0.402565  |   |
| 12            | 6             | 0           | 1.191200                | 0.095240  | -0.758107 |   |
| 13            | 6             | 0           | 1.807771                | 0.827832  | 1.430035  |   |
| 14            | 6             | 0           | 2.419169                | -0.536243 | -0.903798 |   |
| 15            | 1             | 0           | 0.473883                | 0.043181  | -1.569243 |   |
| 16            | 6             | 0           | 3.033287                | 0.201048  | 1.303585  |   |
| 17            | 1             | 0           | 1.580120                | 1.364132  | 2.344985  |   |
| 18            | 6             | 0           | 3.347189                | -0.484790 | 0.132835  |   |
| 19            | 1             | 0           | 2.637159                | -1.061525 | -1.822806 |   |
| 20            | 1             | 0           | 3.766152                | 0.231527  | 2.099665  |   |
| 21            | 6             | 0           | -0.521120               | 2.682242  | -0.288848 |   |
| 22            | 7             | 0           | -0.546749               | 3.620927  | -0.947924 |   |
| 23            | 8             | 0           | 4.571341                | -1.068765 | 0.095236  |   |
| 24            | 6             | 0           | 4.952323                | -1.765700 | -1.074438 |   |
| 25            | 1             | 0           | 5.956926                | -2.138082 | -0.887651 |   |
| 26            | 1             | 0           | 4.284788                | -2.610260 | -1.270510 |   |
| 27            | 1             | 0           | 4.968507                | -1.103375 | -1.945149 |   |
| 28            | 6             | 0           | -4.985753               | -2.152861 | -0.245695 |   |
| 29            | 1             | 0           | -4.644907               | -3.188853 | -0.307761 |   |
| 30            | 1             | 0           | -5.680450               | -2.088090 | 0.595840  |   |
| 31            | 1             | 0           | -5.542771               | -1.926556 | -1.155479 |   |
| 32            | 6             | 0           | -0.477948               | 1.482012  | 0.553266  |   |
| 33            | 1             | 0           | -0.547016               | 1.842390  | 1.584310  |   |

1.4.5. DAAN-OMe/OMe of  $S_0$  state optimized with UCAM-B3LYP/6-311+G(d,p)

| Center Number | Atomic Number | Atomic Type | Coordinates (Angstroms) |           |           | Z |
|---------------|---------------|-------------|-------------------------|-----------|-----------|---|
|               |               |             | X                       | Y         |           |   |
| 1             | 6             | 0           | -2.677511               | -0.716704 | -0.880631 |   |
| 2             | 6             | 0           | -1.499544               | 0.004364  | -0.736793 |   |
| 3             | 6             | 0           | -1.289636               | 0.827484  | 0.359097  |   |
| 4             | 6             | 0           | -2.290186               | 0.918444  | 1.323174  |   |
| 5             | 6             | 0           | -3.467031               | 0.204419  | 1.198133  |   |
| 6             | 6             | 0           | -3.668527               | -0.617778 | 0.092159  |   |
| 7             | 1             | 0           | -2.807761               | -1.347964 | -1.748133 |   |
| 8             | 1             | 0           | -0.731552               | -0.085919 | -1.496472 |   |
| 9             | 1             | 0           | -2.150050               | 1.559791  | 2.186692  |   |
| 10            | 1             | 0           | -4.247276               | 0.269326  | 1.945640  |   |
| 11            | 6             | 0           | 1.261728                | 0.779404  | 0.375571  |   |
| 12            | 6             | 0           | 2.215777                | 0.985075  | -0.604481 |   |
| 13            | 6             | 0           | 1.465633                | -0.254081 | 1.294307  |   |
| 14            | 6             | 0           | 3.354934                | 1.084691  | -0.684632 |   |
| 15            | 1             | 0           | 2.088874                | 1.783879  | -1.325477 |   |
| 16            | 6             | 0           | 2.587518                | -1.050608 | 1.230855  |   |
| 17            | 1             | 0           | 0.726533                | -0.440005 | 2.065805  |   |
| 18            | 6             | 0           | 3.543559                | -0.836357 | 0.235163  |   |
| 19            | 1             | 0           | 4.077693                | 0.376992  | -1.464797 |   |
| 20            | 1             | 0           | 2.750793                | -1.850855 | 1.941479  |   |
| 21            | 6             | 0           | -0.000116               | 2.760368  | -0.426942 |   |
| 22            | 7             | 0           | -0.007138               | 3.644622  | -1.157946 |   |
| 23            | 8             | 0           | -4.851862               | -1.280342 | 0.050966  |   |
| 24            | 8             | 0           | 4.613002                | -1.671933 | 0.252167  |   |
| 25            | 6             | 0           | -5.119502               | -2.118123 | -1.055993 |   |
| 26            | 1             | 0           | -4.393214               | -2.933777 | -1.123491 |   |
| 27            | 1             | 0           | -6.110231               | -2.532996 | -0.885317 |   |
| 28            | 1             | 0           | -5.121077               | -1.552291 | -1.992446 |   |
| 29            | 6             | 0           | 5.617702                | -1.498959 | -0.727006 |   |
| 30            | 1             | 0           | 6.367197                | -2.261109 | -0.526418 |   |
| 31            | 1             | 0           | 5.219016                | -1.640654 | -1.736161 |   |
| 32            | 1             | 0           | 6.079168                | -0.509551 | -0.653409 |   |
| 33            | 6             | 0           | 0.000918                | 1.628190  | 0.505791  |   |
| 34            | 1             | 0           | -0.001564               | 2.072001  | 1.506428  |   |

1.4.6. DAAN-SMe/OMe of  $S_0$  state optimized with UCAM-B3LYP/6-311+G(d,p)

| Center Number | Atomic Number | Atomic Type | Coordinates (Angstroms) |   |  | Z |
|---------------|---------------|-------------|-------------------------|---|--|---|
|               |               |             | X                       | Y |  |   |

|    |    |   |           |           |           |
|----|----|---|-----------|-----------|-----------|
| 1  | 6  | 0 | -2.961668 | -0.743913 | -0.918852 |
| 2  | 6  | 0 | -1.830545 | 0.044766  | -0.756618 |
| 3  | 6  | 0 | -1.663218 | 0.839050  | 0.367702  |
| 4  | 6  | 0 | -2.658452 | 0.831371  | 1.341380  |
| 5  | 6  | 0 | -3.788935 | 0.049109  | 1.197932  |
| 6  | 6  | 0 | -3.948049 | -0.743593 | 0.063852  |
| 7  | 1  | 0 | -3.059870 | -1.349992 | -1.808239 |
| 8  | 1  | 0 | -1.066203 | 0.031801  | -1.525279 |
| 9  | 1  | 0 | -2.551437 | 1.448639  | 2.226887  |
| 10 | 1  | 0 | -4.565114 | 0.037477  | 1.952350  |
| 11 | 6  | 0 | 0.884967  | 0.936460  | 0.407235  |
| 12 | 6  | 0 | 1.845107  | 1.224776  | -0.547815 |
| 13 | 6  | 0 | 1.129423  | -0.108506 | 1.299492  |
| 14 | 6  | 0 | 3.026082  | 0.490695  | -0.622519 |
| 15 | 1  | 0 | 1.686855  | 2.035205  | -1.249429 |
| 16 | 6  | 0 | 2.298607  | -0.837724 | 1.235830  |
| 17 | 1  | 0 | 0.388265  | -0.359568 | 2.050175  |
| 18 | 6  | 0 | 3.265391  | -0.546885 | 0.267716  |
| 19 | 1  | 0 | 3.748989  | 0.748079  | -1.384033 |
| 20 | 1  | 0 | 2.468895  | -1.643281 | 1.940801  |
| 21 | 6  | 0 | -0.479981 | 2.854158  | -0.381571 |
| 22 | 7  | 0 | -0.530124 | 3.746552  | -1.100788 |
| 23 | 8  | 0 | -5.087317 | -1.477606 | 0.006240  |
| 24 | 6  | 0 | -5.310974 | -2.291687 | -1.128075 |
| 25 | 1  | 0 | -4.534709 | -3.056161 | -1.229201 |
| 26 | 1  | 0 | -6.271601 | -2.774865 | -0.965400 |
| 27 | 1  | 0 | -5.357198 | -1.694612 | -2.043717 |
| 28 | 6  | 0 | 5.711302  | -0.861859 | -1.071055 |
| 29 | 1  | 0 | 6.626792  | -1.451584 | -1.094596 |
| 30 | 1  | 0 | 5.206728  | -0.962026 | -2.031576 |
| 31 | 1  | 0 | 5.971285  | 0.179935  | -0.885827 |
| 32 | 6  | 0 | -0.423067 | 1.711273  | 0.536078  |
| 33 | 1  | 0 | -0.458038 | 2.139627  | 1.542788  |
| 34 | 16 | 0 | 4.724989  | -1.551165 | 0.275976  |

1.4.7. **DAAN-F/F** of  $S_0$  state optimized with UCAM-B3LYP/6-311+G(d,p)

| Center Number | Atomic Number | Atomic Type | Coordinates (Angstroms) |           |           | Z |
|---------------|---------------|-------------|-------------------------|-----------|-----------|---|
|               |               |             | X                       | Y         |           |   |
| 1             | 6             | 0           | -2.610523               | -0.701097 | -1.295945 |   |
| 2             | 6             | 0           | -1.463055               | -0.001236 | -0.964382 |   |
| 3             | 6             | 0           | -1.267986               | 0.472719  | 0.330198  |   |
| 4             | 6             | 0           | -2.241343               | 0.236459  | 1.291899  |   |
| 5             | 6             | 0           | -3.397491               | -0.467202 | 0.978312  |   |
| 6             | 6             | 0           | -3.556812               | -0.921562 | -0.312808 |   |
| 7             | 1             | 0           | -2.779665               | -1.075387 | -2.297068 |   |
| 8             | 1             | 0           | -0.709914               | 0.175417  | -1.723268 |   |
| 9             | 1             | 0           | -2.105128               | 0.606402  | 2.301858  |   |
| 10            | 1             | 0           | -4.164553               | -0.660664 | 1.716537  |   |
| 11            | 6             | 0           | 1.279606                | 0.479018  | 0.379901  |   |
| 12            | 6             | 0           | 2.237326                | 0.945152  | -0.510904 |   |
| 13            | 6             | 0           | 1.491623                | -0.738262 | 1.025226  |   |
| 14            | 6             | 0           | 3.390924                | 0.211142  | -0.762379 |   |
| 15            | 1             | 0           | 2.095070                | 1.892997  | -1.015413 |   |
| 16            | 6             | 0           | 2.636158                | -1.479540 | 0.789018  |   |
| 17            | 1             | 0           | 0.748339                | -1.118349 | 1.716761  |   |
| 18            | 6             | 0           | 3.566725                | -0.986846 | -0.106584 |   |
| 19            | 1             | 0           | 4.145170                | 0.562764  | -1.454037 |   |
| 20            | 1             | 0           | 2.814335                | -2.425267 | 1.283854  |   |
| 21            | 6             | 0           | -0.024475               | 2.568917  | 0.057306  |   |
| 22            | 7             | 0           | -0.046419               | 3.601687  | -0.441132 |   |
| 23            | 6             | 0           | -0.003271               | 1.246888  | 0.907299  |   |
| 24            | 1             | 0           | -0.027018               | 1.434034  | 1.768506  |   |
| 25            | 9             | 0           | -4.672666               | -1.605573 | -0.629404 |   |
| 26            | 9             | 0           | 4.681984                | -1.704543 | -0.342522 |   |

1.4.8. **DAAN-F/OMe** of  $S_0$  state optimized with UCAM-B3LYP/6-311+G(d,p)

| Center Number | Atomic Number | Atomic Type | Coordinates (Angstroms) |           |           | Z |
|---------------|---------------|-------------|-------------------------|-----------|-----------|---|
|               |               |             | X                       | Y         |           |   |
| 1             | 6             | 0           | -3.707476               | -0.135445 | -0.876812 |   |
| 2             | 6             | 0           | -2.654756               | 0.748885  | -0.668806 |   |
| 3             | 6             | 0           | -1.699053               | 0.499011  | 0.306983  |   |
| 4             | 6             | 0           | -1.810851               | -0.654449 | 1.081940  |   |
| 5             | 6             | 0           | -2.854834               | -1.542748 | 0.891106  |   |
| 6             | 6             | 0           | -3.786031               | -1.263545 | -0.091515 |   |
| 7             | 1             | 0           | -4.458091               | 0.047385  | -1.634535 |   |
| 8             | 1             | 0           | -2.589448               | 1.642881  | -1.276775 |   |
| 9             | 1             | 0           | -1.065468               | -0.867503 | 1.839510  |   |
| 10            | 1             | 0           | -2.954191               | -2.440930 | 1.486498  |   |
| 11            | 6             | 0           | 0.833727                | 0.772749  | 0.417533  |   |
| 12            | 6             | 0           | 1.193568                | 0.165305  | -0.776219 |   |
| 13            | 6             | 0           | 1.745347                | 0.763878  | 1.469797  |   |
| 14            | 6             | 0           | 2.432490                | -0.441756 | -0.929808 |   |
| 15            | 1             | 0           | 0.499260                | 0.159191  | -1.608903 |   |
| 16            | 6             | 0           | 2.981599                | 0.160299  | 1.335366  |   |
| 17            | 1             | 0           | 1.488502                | 1.238976  | 2.410497  |   |
| 18            | 6             | 0           | 3.333579                | -0.446264 | 0.131986  |   |
| 19            | 1             | 0           | 2.680746                | -0.903878 | -1.874649 |   |
| 20            | 1             | 0           | 3.694239                | 0.149122  | 2.150048  |   |
| 21            | 6             | 0           | -0.596635               | 2.657017  | -0.237477 |   |
| 22            | 7             | 0           | -0.646257               | 3.607209  | -0.878272 |   |
| 23            | 8             | 0           | 4.564934                | -1.012071 | 0.089051  |   |

|    |   |   |           |           |           |
|----|---|---|-----------|-----------|-----------|
| 24 | 6 | 0 | 4.985074  | -1.629665 | -1.112003 |
| 25 | 1 | 0 | 5.989167  | -2.001577 | -0.922077 |
| 26 | 1 | 0 | 4.333773  | -2.467633 | -1.377955 |
| 27 | 1 | 0 | 5.015181  | -0.913296 | -1.938314 |
| 28 | 6 | 0 | -0.527513 | 1.440838  | 0.578961  |
| 29 | 1 | 0 | -0.607163 | 1.777880  | 1.617156  |
| 30 | 9 | 0 | -4.803509 | -2.126576 | -0.284578 |

1.4.9. **DAAN-Br/OMe** of  $S_0$  state optimized with UCAM-B3LYP/6-311+G(d,p)

| Center Number | Atomic Number | Atomic Type | Coordinates (Angstroms) |           |           | Z |
|---------------|---------------|-------------|-------------------------|-----------|-----------|---|
|               |               |             | X                       | Y         |           |   |
| 1             | 6             | 0           | -2.685158               | 0.857195  | -0.763720 |   |
| 2             | 6             | 0           | -1.466155               | 1.511114  | -0.621311 |   |
| 3             | 6             | 0           | -0.551128               | 1.105432  | 0.339842  |   |
| 4             | 6             | 0           | -0.874715               | 0.030656  | 1.165336  |   |
| 5             | 6             | 0           | -2.086225               | -0.626206 | 1.037879  |   |
| 6             | 6             | 0           | -2.985108               | -0.205804 | 0.067524  |   |
| 7             | 1             | 0           | -3.391572               | 1.179719  | -1.516809 |   |
| 8             | 1             | 0           | -1.239242               | 2.348273  | -1.270243 |   |
| 9             | 1             | 0           | -0.166501               | -0.306532 | 1.913592  |   |
| 10            | 1             | 0           | -2.329988               | -1.458662 | 1.684270  |   |
| 11            | 6             | 0           | 1.983735                | 0.847529  | 0.391046  |   |
| 12            | 6             | 0           | 2.181828                | 0.133906  | -0.781601 |   |
| 13            | 6             | 0           | 2.894770                | 0.684946  | 1.431236  |   |
| 14            | 6             | 0           | 3.261062                | -0.727072 | -0.926055 |   |
| 15            | 1             | 0           | 1.484954                | 0.244426  | -1.604811 |   |
| 16            | 6             | 0           | 3.972559                | -0.171282 | 1.305635  |   |
| 17            | 1             | 0           | 2.763945                | 1.238240  | 2.354990  |   |
| 18            | 6             | 0           | 4.163022                | -0.882935 | 0.123530  |   |
| 19            | 1             | 0           | 3.386235                | -1.265966 | -1.854387 |   |
| 20            | 1             | 0           | 4.683916                | -0.302772 | 2.110835  |   |
| 21            | 6             | 0           | 0.959706                | 2.959005  | -0.332013 |   |
| 22            | 7             | 0           | 1.090701                | 3.868882  | -1.018159 |   |
| 23            | 8             | 0           | 5.245933                | -1.697627 | 0.087990  |   |
| 24            | 6             | 0           | 5.500511                | -2.435246 | -1.091801 |   |
| 25            | 1             | 0           | 6.407065                | -3.004163 | -0.899309 |   |
| 26            | 1             | 0           | 4.681297                | -3.125437 | -1.314480 |   |
| 27            | 1             | 0           | 5.663943                | -1.773237 | -1.947298 |   |
| 28            | 35            | 0           | -4.650281               | -1.105914 | -0.117905 |   |
| 29            | 6             | 0           | 0.797343                | 1.793265  | 0.542653  |   |
| 30            | 1             | 0           | 0.817131                | 2.184931  | 1.564434  |   |

1.4.10. **DAAN-Ac/OMe** of  $S_0$  state optimized with UCAM-B3LYP/6-311+G(d,p)

| Center Number | Atomic Number | Atomic Type | Coordinates (Angstroms) |           |           | Z |
|---------------|---------------|-------------|-------------------------|-----------|-----------|---|
|               |               |             | X                       | Y         |           |   |
| 1             | 6             | 0           | -2.444828               | -0.375932 | -1.036375 |   |
| 2             | 6             | 0           | -1.248141               | 0.297027  | -0.859255 |   |
| 3             | 6             | 0           | -0.982782               | 0.953530  | 0.337583  |   |
| 4             | 6             | 0           | -1.931621               | 0.924774  | 1.353421  |   |
| 5             | 6             | 0           | -3.126604               | 0.246328  | 1.179702  |   |
| 6             | 6             | 0           | -3.396355               | -0.410801 | -0.017080 |   |
| 7             | 1             | 0           | -2.630777               | -0.876866 | -1.977707 |   |
| 8             | 1             | 0           | -0.513661               | 0.310758  | -1.655969 |   |
| 9             | 1             | 0           | -1.736810               | 1.439310  | 2.287919  |   |
| 10            | 1             | 0           | -3.871120               | 0.215484  | 1.964924  |   |
| 11            | 6             | 0           | 1.554022                | 0.780758  | 0.401240  |   |
| 12            | 6             | 0           | 2.518393                | 0.952238  | -0.575492 |   |
| 13            | 6             | 0           | 1.700898                | -0.276280 | 1.303598  |   |
| 14            | 6             | 0           | 3.612940                | 0.094020  | -0.668049 |   |
| 15            | 1             | 0           | 2.436311                | 1.769513  | -1.282135 |   |
| 16            | 6             | 0           | 2.778414                | -1.130758 | 1.226611  |   |
| 17            | 1             | 0           | 0.954804                | -0.434620 | 2.074623  |   |
| 18            | 6             | 0           | 3.745488                | -0.951483 | 0.234638  |   |
| 19            | 1             | 0           | 4.346764                | 0.261086  | -1.443617 |   |
| 20            | 1             | 0           | 2.898215                | -1.949780 | 1.924275  |   |
| 21            | 6             | 0           | 0.406360                | 2.849109  | -0.355999 |   |
| 22            | 7             | 0           | 0.455322                | 3.752490  | -1.061070 |   |
| 23            | 8             | 0           | 4.767936                | -1.842127 | 0.238072  |   |
| 24            | 6             | 0           | 5.782610                | -1.708006 | -0.737760 |   |
| 25            | 1             | 0           | 6.488966                | -2.512945 | -0.548688 |   |
| 26            | 1             | 0           | 5.378184                | -1.811765 | -1.749123 |   |
| 27            | 1             | 0           | 6.296834                | -0.746536 | -0.647162 |   |
| 28            | 6             | 0           | -4.704281               | -1.129883 | -0.156392 |   |
| 29            | 8             | 0           | -5.491342               | -1.150777 | 0.762771  |   |
| 30            | 6             | 0           | -5.018120               | -1.823266 | -1.459603 |   |
| 31            | 1             | 0           | -5.009489               | -1.112635 | -2.289267 |   |
| 32            | 1             | 0           | -4.275036               | -2.593987 | -1.677336 |   |
| 33            | 1             | 0           | -6.001980               | -2.280414 | -1.383394 |   |
| 34            | 6             | 0           | 0.337619                | 1.691751  | 0.540524  |   |
| 35            | 1             | 0           | 0.334700                | 2.100445  | 1.555519  |   |

1.4.11. **DAAN-COOMe/OMe** of  $S_0$  state optimized with UCAM-B3LYP/6-311+G(d,p)

| Center Number | Atomic Number | Atomic Type | Coordinates (Angstroms) |          |           | Z |
|---------------|---------------|-------------|-------------------------|----------|-----------|---|
|               |               |             | X                       | Y        |           |   |
| 1             | 6             | 0           | -2.690090               | 0.796608 | -0.643713 |   |
| 2             | 6             | 0           | -1.470128               | 1.455058 | -0.559326 |   |

|    |   |   |           |           |           |
|----|---|---|-----------|-----------|-----------|
| 3  | 6 | 0 | -0.544628 | 1.098561  | 0.412420  |
| 4  | 6 | 0 | -0.856484 | 0.073635  | 1.305661  |
| 5  | 6 | 0 | -2.070519 | -0.579931 | 1.227728  |
| 6  | 6 | 0 | -2.995933 | -0.222587 | 0.248658  |
| 7  | 1 | 0 | -3.407515 | 1.076933  | -1.402788 |
| 8  | 1 | 0 | -1.246377 | 2.254773  | -1.254673 |
| 9  | 1 | 0 | -0.136179 | -0.218636 | 2.061163  |
| 10 | 1 | 0 | -2.322085 | -1.374578 | 1.918320  |
| 11 | 6 | 0 | 1.986009  | 0.829581  | 0.369631  |
| 12 | 6 | 0 | 2.132666  | 0.094402  | -0.797109 |
| 13 | 6 | 0 | 2.937113  | 0.679652  | 1.375299  |
| 14 | 6 | 0 | 3.200357  | -0.775927 | -0.969288 |
| 15 | 1 | 0 | 1.403842  | 0.194556  | -1.593521 |
| 16 | 6 | 0 | 4.004105  | -0.185278 | 1.221716  |
| 17 | 1 | 0 | 2.846425  | 1.249557  | 2.293701  |
| 18 | 6 | 0 | 4.142790  | -0.918981 | 0.045851  |
| 19 | 1 | 0 | 3.284762  | -1.332219 | -1.891936 |
| 20 | 1 | 0 | 4.746372  | -0.307292 | 2.000052  |
| 21 | 6 | 0 | 0.946703  | 2.937203  | -0.345601 |
| 22 | 7 | 0 | 1.058624  | 3.836144  | -1.049296 |
| 23 | 8 | 0 | 5.218838  | -1.741032 | -0.018453 |
| 24 | 6 | 0 | 5.419451  | -2.503860 | -1.192495 |
| 25 | 1 | 0 | 6.329294  | -3.075754 | -1.026043 |
| 26 | 1 | 0 | 4.587042  | -3.192069 | -1.367242 |
| 27 | 1 | 0 | 5.551930  | -1.860324 | -2.067260 |
| 28 | 6 | 0 | 0.811641  | 1.785365  | 0.551845  |
| 29 | 1 | 0 | 0.870649  | 2.190198  | 1.566799  |
| 30 | 6 | 0 | -4.288167 | -0.957958 | 0.205750  |
| 31 | 8 | 0 | -4.590856 | -1.844600 | 0.963049  |
| 32 | 8 | 0 | -5.094824 | -0.528708 | -0.775337 |
| 33 | 6 | 0 | -6.359368 | -1.190097 | -0.876221 |
| 34 | 1 | 0 | -6.870568 | -0.718674 | -1.711323 |
| 35 | 1 | 0 | -6.217560 | -2.254292 | -1.063309 |
| 36 | 1 | 0 | -6.928769 | -1.063150 | 0.044240  |

1.4.12. DAAN-CN/OMe of S<sub>0</sub> state optimized with UCAM-B3LYP/6-311+G(d,p)

| Center Number | Atomic Number | Atomic Type | Coordinates (Angstroms) |           |           |
|---------------|---------------|-------------|-------------------------|-----------|-----------|
|               |               |             | X                       | Y         | Z         |
| 1             | 6             | 0           | -2.703768               | -0.733671 | -1.132533 |
| 2             | 6             | 0           | -1.566062               | 0.007190  | -0.875211 |
| 3             | 6             | 0           | -1.433712               | 0.706565  | 0.321131  |
| 4             | 6             | 0           | -2.457421               | 0.653105  | 1.258372  |
| 5             | 6             | 0           | -3.601625               | -0.090059 | 1.013736  |
| 6             | 6             | 0           | -3.727672               | -0.786606 | -0.184900 |
| 7             | 1             | 0           | -2.806435               | -1.275916 | -2.063542 |
| 8             | 1             | 0           | -0.769171               | 0.038444  | -1.608355 |
| 9             | 1             | 0           | -2.366063               | 1.198272  | 2.190762  |
| 10            | 1             | 0           | -4.396530               | -0.131709 | 1.747020  |
| 11            | 6             | 0           | 1.109240                | 0.729193  | 0.437560  |
| 12            | 6             | 0           | 2.049405                | 1.005102  | -0.539058 |
| 13            | 6             | 0           | 1.347282                | -0.336246 | 1.310058  |
| 14            | 6             | 0           | 3.208614                | 0.241042  | -0.660849 |
| 15            | 1             | 0           | 1.897057                | 1.833022  | -1.221344 |
| 16            | 6             | 0           | 2.489230                | -1.098776 | 1.203731  |
| 17            | 1             | 0           | 0.623109                | -0.574036 | 2.081808  |
| 18            | 6             | 0           | 3.431327                | -0.815111 | 0.211738  |
| 19            | 1             | 0           | 3.921453                | 0.488143  | -1.434561 |
| 20            | 1             | 0           | 2.680268                | -1.923750 | 1.878052  |
| 21            | 6             | 0           | -0.188960               | 2.742271  | -0.220361 |
| 22            | 7             | 0           | -0.205105               | 3.688878  | -0.867727 |
| 23            | 8             | 0           | 4.521315                | -1.619377 | 0.185521  |
| 24            | 6             | 0           | 5.514417                | -1.380078 | -0.793204 |
| 25            | 1             | 0           | 6.283306                | -2.131425 | -0.629799 |
| 26            | 1             | 0           | 5.110581                | -1.489477 | -1.804085 |
| 27            | 1             | 0           | 5.951869                | -0.383758 | -0.679907 |
| 28            | 6             | 0           | -4.905829               | -1.559833 | -0.444424 |
| 29            | 7             | 0           | -5.849697               | -2.181007 | -0.651047 |
| 30            | 6             | 0           | -0.178172               | 1.529286  | 0.602700  |
| 31            | 1             | 0           | -0.234119               | 1.871866  | 1.640299  |

1.4.13. DAAN-NO<sub>2</sub>/OMe of S<sub>0</sub> state optimized with UCAM-B3LYP/6-311+G(d,p)

| Center Number | Atomic Number | Atomic Type | Coordinates (Angstroms) |           |           |
|---------------|---------------|-------------|-------------------------|-----------|-----------|
|               |               |             | X                       | Y         | Z         |
| 1             | 6             | 0           | -3.124145               | 0.614896  | -0.752558 |
| 2             | 6             | 0           | -1.953708               | 1.336818  | -0.563872 |
| 3             | 6             | 0           | -1.017963               | 0.930343  | 0.379407  |
| 4             | 6             | 0           | -1.266251               | -0.211535 | 1.141541  |
| 5             | 6             | 0           | -2.429057               | -0.937265 | 0.967333  |
| 6             | 6             | 0           | -3.341921               | -0.509674 | 0.018421  |
| 7             | 1             | 0           | -3.861211               | 0.915834  | -1.483428 |
| 8             | 1             | 0           | -1.777093               | 2.224622  | -1.157923 |
| 9             | 1             | 0           | -0.535568               | -0.541604 | 1.870122  |
| 10            | 1             | 0           | -2.637975               | -1.822511 | 1.553247  |
| 11            | 6             | 0           | 1.522918                | 0.827171  | 0.432383  |
| 12            | 6             | 0           | 1.803721                | 0.253690  | -0.798917 |
| 13            | 6             | 0           | 2.396632                | 0.594927  | 1.491343  |
| 14            | 6             | 0           | 2.927920                | -0.539257 | -0.982588 |
| 15            | 1             | 0           | 1.140395                | 0.424725  | -1.639481 |
| 16            | 6             | 0           | 3.518405                | -0.195053 | 1.326289  |
| 17            | 1             | 0           | 2.202275                | 1.041090  | 2.460738  |
| 18            | 6             | 0           | 3.791641                | -0.767894 | 0.085972  |

|    |   |   |           |           |           |
|----|---|---|-----------|-----------|-----------|
| 19 | 1 | 0 | 3.118372  | -0.968318 | -1.955924 |
| 20 | 1 | 0 | 4.202193  | -0.379613 | 2.144783  |
| 21 | 6 | 0 | 0.372023  | 2.913321  | -0.175284 |
| 22 | 7 | 0 | 0.444231  | 3.866936  | -0.808381 |
| 23 | 8 | 0 | 4.912131  | -1.525097 | 0.015734  |
| 24 | 6 | 0 | 5.250736  | -2.124203 | -1.220863 |
| 25 | 1 | 0 | 6.173990  | -2.671028 | -1.045121 |
| 26 | 1 | 0 | 4.474831  | -2.821383 | -1.550535 |
| 27 | 1 | 0 | 5.418926  | -1.369804 | -1.994937 |
| 28 | 6 | 0 | 0.282532  | 1.691236  | 0.629303  |
| 29 | 1 | 0 | 0.271024  | 2.020443  | 1.672958  |
| 30 | 7 | 0 | -4.583155 | -1.280944 | -0.175715 |
| 31 | 8 | 0 | -5.363348 | -0.890469 | -1.021509 |
| 32 | 8 | 0 | -4.751106 | -2.261873 | 0.522314  |

1.4.14. DAAN-OMe/diOMe of S<sub>0</sub> state optimized with UCAM-B3LYP/6-311+G(d,p)

| Center Number | Atomic Number | Atomic Type | Coordinates (Angstroms) |           |           |
|---------------|---------------|-------------|-------------------------|-----------|-----------|
|               |               |             | X                       | Y         | Z         |
| 1             | 6             | 0           | 2.803231                | -1.238554 | -0.683105 |
| 2             | 6             | 0           | 1.642971                | -0.553283 | -1.025096 |
| 3             | 6             | 0           | 1.419645                | 0.748364  | -0.602563 |
| 4             | 6             | 0           | 2.391595                | 1.364186  | 0.181610  |
| 5             | 6             | 0           | 3.549829                | 0.695991  | 0.531516  |
| 6             | 6             | 0           | 3.764402                | -0.610735 | 0.101489  |
| 7             | 1             | 0           | 2.939526                | -2.252536 | -1.031866 |
| 8             | 1             | 0           | 0.897006                | -1.058918 | -1.627702 |
| 9             | 1             | 0           | 2.241211                | 2.378628  | 0.530522  |
| 10            | 1             | 0           | 4.306190                | 1.171135  | 1.143338  |
| 11            | 6             | 0           | -1.126464               | 0.655650  | -0.837523 |
| 12            | 6             | 0           | -1.563701               | 0.330495  | 0.449594  |
| 13            | 6             | 0           | -1.880134               | 0.211660  | -1.914861 |
| 14            | 6             | 0           | -2.719687               | -0.421556 | 0.644933  |
| 15            | 6             | 0           | -3.029766               | -0.540036 | -1.746984 |
| 16            | 1             | 0           | -1.558879               | 0.464724  | -2.919495 |
| 17            | 6             | 0           | -3.448849               | -0.856250 | -0.460461 |
| 18            | 1             | 0           | -3.044034               | -0.660996 | 1.644762  |
| 19            | 1             | 0           | -3.613688               | -0.882799 | -2.590317 |
| 20            | 6             | 0           | 0.018760                | 2.804624  | -0.467636 |
| 21            | 7             | 0           | -0.079676               | 3.868632  | -0.050636 |
| 22            | 8             | 0           | 4.930744                | -1.186641 | 0.496671  |
| 23            | 8             | 0           | -4.584177               | -1.593348 | -0.366306 |
| 24            | 6             | 0           | 5.202863                | -2.508613 | 0.080735  |
| 25            | 1             | 0           | 5.251404                | -2.582151 | -1.010179 |
| 26            | 1             | 0           | 6.173606                | -2.762550 | 0.500717  |
| 27            | 1             | 0           | 4.451818                | -3.209278 | 0.458893  |
| 28            | 6             | 0           | -5.073624               | -1.935421 | 0.914231  |
| 29            | 1             | 0           | -5.980204               | -2.511682 | 0.744247  |
| 30            | 1             | 0           | -4.355122               | -2.549686 | 1.465696  |
| 31            | 1             | 0           | -5.318498               | -1.043705 | 1.499293  |
| 32            | 6             | 0           | 0.142755                | 1.462632  | -1.049697 |
| 33            | 1             | 0           | 0.225662                | 1.632759  | -2.128360 |
| 34            | 8             | 0           | -0.796903               | 0.795009  | 1.461435  |
| 35            | 6             | 0           | -1.196158               | 0.571974  | 2.798888  |
| 36            | 1             | 0           | -2.175282               | 1.016646  | 2.998816  |
| 37            | 1             | 0           | -1.219381               | -0.496442 | 3.033420  |
| 38            | 1             | 0           | -0.446906               | 1.059491  | 3.417842  |

1.4.15. DAAN-OMe/triOMe of S<sub>0</sub> state optimized with UCAM-B3LYP/6-311+G(d,p)

| Center Number | Atomic Number | Atomic Type | Coordinates (Angstroms) |           |           |
|---------------|---------------|-------------|-------------------------|-----------|-----------|
|               |               |             | X                       | Y         | Z         |
| 1             | 6             | 0           | 3.031801                | 0.840734  | -1.081680 |
| 2             | 6             | 0           | 1.846704                | 1.027462  | -0.379719 |
| 3             | 6             | 0           | 1.561938                | 0.301443  | 0.767253  |
| 4             | 6             | 0           | 2.498113                | -0.628118 | 1.210502  |
| 5             | 6             | 0           | 3.682186                | -0.825182 | 0.524314  |
| 6             | 6             | 0           | 3.956752                | -0.093258 | -0.627385 |
| 7             | 1             | 0           | 3.217736                | 1.426929  | -1.970640 |
| 8             | 1             | 0           | 1.131154                | 1.756863  | -0.743015 |
| 9             | 1             | 0           | 2.300406                | -1.207555 | 2.104073  |
| 10            | 1             | 0           | 4.413340                | -1.546861 | 0.866183  |
| 11            | 6             | 0           | -0.985551               | 0.319097  | 0.638378  |
| 12            | 6             | 0           | -1.337002               | -0.968245 | 0.240462  |
| 13            | 6             | 0           | -1.798140               | 1.378200  | 0.219405  |
| 14            | 6             | 0           | -2.463610               | -1.215644 | -0.545552 |
| 15            | 6             | 0           | -2.922164               | 1.161779  | -0.563615 |
| 16            | 6             | 0           | -3.246327               | -0.138024 | -0.938287 |
| 17            | 1             | 0           | -2.715184               | -2.221587 | -0.837073 |
| 18            | 1             | 0           | -3.562744               | 1.963657  | -0.896457 |
| 19            | 6             | 0           | 0.151897                | -0.131295 | 2.777097  |
| 20            | 7             | 0           | 0.078112                | -0.644756 | 3.800350  |
| 21            | 8             | 0           | 5.145027                | -0.357397 | -1.235262 |
| 22            | 8             | 0           | -4.362089               | -0.258274 | -1.701242 |
| 23            | 6             | 0           | 5.478664                | 0.365965  | -2.400910 |
| 24            | 1             | 0           | 5.540410                | 1.440306  | -2.200807 |
| 25            | 1             | 0           | 6.455818                | 0.002671  | -2.711715 |
| 26            | 1             | 0           | 4.755770                | 0.187503  | -3.203284 |
| 27            | 6             | 0           | -4.765785               | -1.546778 | -2.119259 |
| 28            | 1             | 0           | -5.670216               | -1.401373 | -2.705576 |
| 29            | 1             | 0           | -4.002892               | -2.020165 | -2.744578 |

|    |   |   |           |           |           |
|----|---|---|-----------|-----------|-----------|
| 30 | 1 | 0 | -4.990163 | -2.190899 | -1.263865 |
| 31 | 6 | 0 | 0.244714  | 0.571993  | 1.492923  |
| 32 | 1 | 0 | 0.226292  | 1.633202  | 1.749424  |
| 33 | 8 | 0 | -0.511351 | -1.946658 | 0.673309  |
| 34 | 6 | 0 | -0.821420 | -3.297669 | 0.395877  |
| 35 | 1 | 0 | -1.792177 | -3.575069 | 0.816109  |
| 36 | 1 | 0 | -0.812612 | -3.494350 | -0.680188 |
| 37 | 1 | 0 | -0.041633 | -3.885017 | 0.874693  |
| 38 | 8 | 0 | -1.409389 | 2.617778  | 0.621271  |
| 39 | 6 | 0 | -2.221136 | 3.730144  | 0.293432  |
| 40 | 1 | 0 | -1.735782 | 4.594952  | 0.740030  |
| 41 | 1 | 0 | -2.285781 | 3.869152  | -0.789301 |
| 42 | 1 | 0 | -3.226265 | 3.621699  | 0.709511  |

1.4.16. DAAN-diOMe/diOMe of  $S_0$  state optimized with UCAM-B3LYP/6-311+G(d,p)

| Center Number | Atomic Number | Atomic Type | Coordinates (Angstroms) |           |           |
|---------------|---------------|-------------|-------------------------|-----------|-----------|
|               |               |             | X                       | Y         | Z         |
| 1             | 6             | 0           | -2.173788               | 1.872206  | 0.025136  |
| 2             | 6             | 0           | -1.083314               | 1.003656  | -0.002887 |
| 3             | 6             | 0           | -1.230563               | -0.353874 | -0.189617 |
| 4             | 6             | 0           | -2.531665               | -0.856549 | -0.369452 |
| 5             | 6             | 0           | -3.629405               | -0.016423 | -0.342118 |
| 6             | 6             | 0           | -3.447649               | 1.352736  | -0.140566 |
| 7             | 1             | 0           | -2.008468               | 2.928757  | 0.175802  |
| 8             | 1             | 0           | -0.090713               | 1.413039  | 0.126636  |
| 9             | 1             | 0           | -4.637381               | -0.380536 | -0.475910 |
| 10            | 6             | 0           | 1.308034                | -0.714548 | -0.454605 |
| 11            | 6             | 0           | 2.023658                | -0.099422 | 0.575269  |
| 12            | 6             | 0           | 1.900452                | -0.767746 | -1.711003 |
| 13            | 6             | 0           | 3.295949                | 0.427393  | 0.354428  |
| 14            | 6             | 0           | 3.154174                | -0.241655 | -1.958935 |
| 15            | 1             | 0           | 1.361652                | -1.245798 | -2.521659 |
| 16            | 6             | 0           | 3.856723                | 0.353981  | -0.917427 |
| 17            | 1             | 0           | 3.832635                | 0.891470  | 1.166308  |
| 18            | 1             | 0           | 3.608391                | -0.292390 | -2.939205 |
| 19            | 6             | 0           | -0.075667               | -2.236066 | 0.925598  |
| 20            | 7             | 0           | -0.091368               | -2.974446 | 1.803274  |
| 21            | 8             | 0           | -4.588431               | 2.090336  | -0.129656 |
| 22            | 8             | 0           | 5.085659                | 0.840260  | -1.226195 |
| 23            | 6             | 0           | -4.483608               | 3.484599  | 0.075390  |
| 24            | 1             | 0           | -3.899014               | 3.960991  | -0.717435 |
| 25            | 1             | 0           | -5.500952               | 3.868920  | 0.052627  |
| 26            | 1             | 0           | -4.032603               | 3.711128  | 1.046174  |
| 27            | 6             | 0           | 5.5858208               | 1.440047  | -0.206888 |
| 28            | 1             | 0           | 6.792145                | 1.740886  | -0.676144 |
| 29            | 1             | 0           | 5.360968                | 2.324419  | 0.203647  |
| 30            | 1             | 0           | 6.072291                | 0.732796  | 0.600259  |
| 31            | 6             | 0           | -0.060831               | -1.332786 | -0.238678 |
| 32            | 1             | 0           | -0.244483               | -1.992763 | -1.091125 |
| 33            | 8             | 0           | 1.398964                | -0.036482 | 1.774844  |
| 34            | 6             | 0           | 2.127818                | 0.342028  | 2.925422  |
| 35            | 1             | 0           | 3.009403                | -0.291034 | 3.058818  |
| 36            | 1             | 0           | 2.430479                | 1.392903  | 2.879717  |
| 37            | 1             | 0           | 1.451764                | 0.199030  | 3.764955  |
| 38            | 8             | 0           | -2.614170               | -2.194100 | -0.578193 |
| 39            | 6             | 0           | -3.890981               | -2.796265 | -0.669394 |
| 40            | 1             | 0           | -3.710867               | -3.862547 | -0.783835 |
| 41            | 1             | 0           | -4.472740               | -2.621754 | 0.239704  |
| 42            | 1             | 0           | -4.444382               | -2.424393 | -1.536685 |

1.4.17. DAAN-diOMe/triOMe of  $S_0$  state optimized with UCAM-B3LYP/6-311+G(d,p)

| Center Number | Atomic Number | Atomic Type | Coordinates (Angstroms) |           |           |
|---------------|---------------|-------------|-------------------------|-----------|-----------|
|               |               |             | X                       | Y         | Z         |
| 1             | 6             | 0           | 2.377107                | -1.779307 | -0.774900 |
| 2             | 6             | 0           | 1.262320                | -1.068421 | -0.330401 |
| 3             | 6             | 0           | 1.357917                | 0.212826  | 0.167210  |
| 4             | 6             | 0           | 2.631270                | 0.808352  | 0.210417  |
| 5             | 6             | 0           | 3.752518                | 0.123286  | -0.220477 |
| 6             | 6             | 0           | 3.622721                | -1.176489 | -0.712290 |
| 7             | 1             | 0           | 2.251624                | -2.782101 | -1.155812 |
| 8             | 1             | 0           | 0.290876                | -1.541703 | -0.379714 |
| 9             | 1             | 0           | 4.740018                | 0.560003  | -0.194999 |
| 10            | 6             | 0           | -1.197095               | 0.513257  | 0.198957  |
| 11            | 6             | 0           | -1.851106               | -0.539259 | 0.833176  |
| 12            | 6             | 0           | -1.849557               | 1.126942  | -0.879652 |
| 13            | 6             | 0           | -3.123605               | -0.964653 | 0.443143  |
| 14            | 6             | 0           | -3.107795               | 0.718919  | -1.294299 |
| 15            | 6             | 0           | -3.738440               | -0.323769 | -0.622664 |
| 16            | 1             | 0           | -3.605126               | -1.779604 | 0.957561  |
| 17            | 1             | 0           | -3.626615               | 1.182378  | -2.119034 |
| 18            | 6             | 0           | 0.205533                | 1.236414  | 2.103999  |
| 19            | 7             | 0           | 0.248759                | 1.453409  | 3.229748  |
| 20            | 8             | 0           | 4.783915                | -1.761816 | -1.109214 |
| 21            | 8             | 0           | -4.968910               | -0.653467 | -1.091255 |
| 22            | 6             | 0           | 4.731285                | -3.082044 | -1.608970 |
| 23            | 1             | 0           | 4.113917                | -3.142891 | -2.510454 |
| 24            | 1             | 0           | 5.755917                | -3.351255 | -1.856072 |
| 25            | 1             | 0           | 4.345623                | -3.777311 | -0.857167 |
| 26            | 6             | 0           | -5.681427               | -1.695562 | -0.456032 |

|    |   |   |           |           |           |
|----|---|---|-----------|-----------|-----------|
| 27 | 1 | 0 | -6.628318 | -1.776709 | -0.985000 |
| 28 | 1 | 0 | -5.145556 | -2.646861 | -0.528324 |
| 29 | 1 | 0 | -5.874234 | -1.462970 | 0.595502  |
| 30 | 6 | 0 | 0.157693  | 1.023441  | 0.647480  |
| 31 | 1 | 0 | 0.269485  | 2.022411  | 0.221979  |
| 32 | 8 | 0 | -1.160749 | -1.132024 | 1.834458  |
| 33 | 6 | 0 | -1.822484 | -2.017913 | 2.715630  |
| 34 | 1 | 0 | -2.702661 | -1.546174 | 3.160561  |
| 35 | 1 | 0 | -2.114055 | -2.942860 | 2.208538  |
| 36 | 1 | 0 | -1.103400 | -2.248268 | 3.498091  |
| 37 | 8 | 0 | -1.172344 | 2.140081  | -1.476100 |
| 38 | 6 | 0 | -1.778179 | 2.830333  | -2.552135 |
| 39 | 1 | 0 | -1.065535 | 3.594303  | -2.854326 |
| 40 | 1 | 0 | -1.970097 | 2.159969  | -3.394456 |
| 41 | 1 | 0 | -2.712425 | 3.306465  | -2.241906 |
| 42 | 8 | 0 | 2.664389  | 2.077142  | 0.687735  |
| 43 | 6 | 0 | 3.915673  | 2.713573  | 0.855198  |
| 44 | 1 | 0 | 4.425154  | 2.847710  | -0.103714 |
| 45 | 1 | 0 | 3.700165  | 3.686618  | 1.290387  |
| 46 | 1 | 0 | 4.557421  | 2.146108  | 1.534807  |

1.4.18. DAAN-triOMe/triOMe of  $S_0$  state optimized with UCAM-B3LYP/6-311+G(d,p)

| Center Number | Atomic Number | Atomic Type | Coordinates (Angstroms) |           |           |
|---------------|---------------|-------------|-------------------------|-----------|-----------|
|               |               |             | X                       | Y         | Z         |
| 1             | 6             | 0           | 2.603446                | -1.386891 | -0.925876 |
| 2             | 6             | 0           | 1.444648                | -1.109205 | -0.195121 |
| 3             | 6             | 0           | 1.311554                | 0.048728  | 0.564439  |
| 4             | 6             | 0           | 2.404825                | 0.924508  | 0.607908  |
| 5             | 6             | 0           | 3.566287                | 0.674258  | -0.107861 |
| 6             | 6             | 0           | 3.653375                | -0.482014 | -0.874461 |
| 7             | 1             | 0           | 2.675380                | -2.288561 | -1.510531 |
| 8             | 1             | 0           | 4.416283                | 1.338480  | -0.087341 |
| 9             | 6             | 0           | -1.242954               | 0.377490  | 0.548234  |
| 10            | 6             | 0           | -2.243301               | -0.589744 | 0.613711  |
| 11            | 6             | 0           | -1.458376               | 1.463658  | -0.313104 |
| 12            | 6             | 0           | -3.417602               | -0.487596 | -0.140923 |
| 13            | 6             | 0           | -2.606183               | 1.582152  | -1.080781 |
| 14            | 6             | 0           | -3.583368               | 0.598315  | -0.985316 |
| 15            | 1             | 0           | -4.171655               | -1.253436 | -0.067431 |
| 16            | 1             | 0           | -2.778028               | 2.414472  | -1.745500 |
| 17            | 6             | 0           | 0.016419                | -0.397893 | 2.606567  |
| 18            | 7             | 0           | 0.081894                | -0.919724 | 3.626505  |
| 19            | 8             | 0           | 4.824502                | -0.647848 | -1.543790 |
| 20            | 8             | 0           | -4.680071               | 0.788950  | -1.766021 |
| 21            | 6             | 0           | 4.998513                | -1.808700 | -2.329131 |
| 22            | 1             | 0           | 4.258934                | -1.861041 | -3.134075 |
| 23            | 1             | 0           | 5.993693                | -1.731977 | -2.761633 |
| 24            | 1             | 0           | 4.939523                | -2.715485 | -1.719469 |
| 25            | 6             | 0           | -5.720849               | -0.164138 | -1.715828 |
| 26            | 1             | 0           | -6.484617               | 0.188576  | -2.405500 |
| 27            | 1             | 0           | -5.374282               | -1.151509 | -2.036391 |
| 28            | 1             | 0           | -6.148166               | -0.236362 | -0.710992 |
| 29            | 6             | 0           | 0.048249                | 0.373150  | 1.355890  |
| 30            | 1             | 0           | 0.188568                | 1.403736  | 1.686976  |
| 31            | 8             | 0           | -2.019584               | -1.636367 | 1.437387  |
| 32            | 6             | 0           | -3.079606               | -2.497796 | 1.789465  |
| 33            | 1             | 0           | -3.932797               | -1.939361 | 2.185671  |
| 34            | 1             | 0           | -3.404755               | -3.106448 | 0.939079  |
| 35            | 1             | 0           | -2.683826               | -3.148987 | 2.565919  |
| 36            | 8             | 0           | -0.467402               | 2.391124  | -0.329716 |
| 37            | 6             | 0           | -0.605841               | 3.528111  | -1.156574 |
| 38            | 1             | 0           | 0.291764                | 4.122088  | -0.998868 |
| 39            | 1             | 0           | -0.672952               | 3.246456  | -2.211309 |
| 40            | 1             | 0           | -1.484662               | 4.117672  | -0.879715 |
| 41            | 8             | 0           | 2.257673                | 2.016887  | 1.399170  |
| 42            | 6             | 0           | 3.332091                | 2.926386  | 1.520637  |
| 43            | 1             | 0           | 3.581510                | 3.379758  | 0.556714  |
| 44            | 1             | 0           | 2.992244                | 3.699289  | 2.206517  |
| 45            | 1             | 0           | 4.219413                | 2.439588  | 1.934940  |
| 46            | 8             | 0           | 0.382682                | -1.946033 | -0.173247 |
| 47            | 6             | 0           | 0.456018                | -3.185351 | -0.842126 |
| 48            | 1             | 0           | 0.568378                | -3.052849 | -1.922795 |
| 49            | 1             | 0           | 1.278104                | -3.797394 | -0.459232 |
| 50            | 1             | 0           | -0.487778               | -3.686928 | -0.639308 |

1.4.19. DAAN-OMe/diOMe-m of  $S_0$  state optimized with UCAM-B3LYP/6-311+G(d,p)

| Center Number | Atomic Number | Atomic Type | Coordinates (Angstroms) |           |           |
|---------------|---------------|-------------|-------------------------|-----------|-----------|
|               |               |             | X                       | Y         | Z         |
| 1             | 6             | 0           | 2.996357                | -0.494792 | 1.023394  |
| 2             | 6             | 0           | 1.817988                | 0.100431  | 0.590890  |
| 3             | 6             | 0           | 1.702065                | 0.617322  | -0.689975 |
| 4             | 6             | 0           | 2.798137                | 0.526918  | -1.544675 |
| 5             | 6             | 0           | 3.976484                | -0.065113 | -1.132162 |
| 6             | 6             | 0           | 4.083235                | -0.578931 | 0.158261  |
| 7             | 1             | 0           | 3.051063                | -0.888125 | 2.028570  |
| 8             | 1             | 0           | 0.974599                | 0.150395  | 1.269653  |
| 9             | 1             | 0           | 2.731660                | 0.927688  | -2.550480 |
| 10            | 1             | 0           | 4.830301                | -0.140878 | -1.793258 |
| 11            | 6             | 0           | -0.848856               | 0.513346  | -0.810751 |

|    |   |   |           |           |           |
|----|---|---|-----------|-----------|-----------|
| 12 | 6 | 0 | -1.768492 | 0.975453  | 0.132284  |
| 13 | 6 | 0 | -1.078662 | -0.695562 | -1.438393 |
| 14 | 6 | 0 | -2.899039 | 0.237973  | 0.445314  |
| 15 | 1 | 0 | -1.599971 | 1.928217  | 0.614277  |
| 16 | 6 | 0 | -2.210992 | -1.446512 | -1.132150 |
| 17 | 1 | 0 | -0.372674 | -1.074764 | -2.168023 |
| 18 | 6 | 0 | -3.125590 | -0.996070 | -0.195218 |
| 19 | 1 | 0 | -2.370189 | -2.388614 | -1.637454 |
| 20 | 6 | 0 | 0.365921  | 2.672825  | -0.662087 |
| 21 | 7 | 0 | 0.331253  | 3.749541  | -0.266935 |
| 22 | 8 | 0 | 5.275807  | -1.142509 | 0.477417  |
| 23 | 8 | 0 | -4.252457 | -1.652428 | 0.166698  |
| 24 | 6 | 0 | 5.448390  | -1.667144 | 1.778726  |
| 25 | 1 | 0 | 4.745330  | -2.481964 | 1.976674  |
| 26 | 1 | 0 | 6.464480  | -2.053340 | 1.814074  |
| 27 | 1 | 0 | 5.330329  | -0.890368 | 2.540202  |
| 28 | 6 | 0 | -4.533115 | -2.889071 | -0.454181 |
| 29 | 1 | 0 | -5.470562 | -3.233551 | -0.023501 |
| 30 | 1 | 0 | -4.652661 | -2.775019 | -1.536230 |
| 31 | 1 | 0 | -3.749446 | -3.625755 | -0.250721 |
| 32 | 6 | 0 | 0.415383  | 1.292926  | -1.158682 |
| 33 | 1 | 0 | 0.466418  | 1.373532  | -2.248546 |
| 34 | 8 | 0 | -3.837008 | 0.617930  | 1.341901  |
| 35 | 6 | 0 | -3.676922 | 1.862571  | 1.993729  |
| 36 | 1 | 0 | -4.539426 | 1.968442  | 2.647617  |
| 37 | 1 | 0 | -2.762392 | 1.884713  | 2.594213  |
| 38 | 1 | 0 | -3.660115 | 2.689240  | 1.277405  |

1.4.20. **DAAN-diOMe-m/diOMe-m** of  $S_0$  state optimized with UCAM-B3LYP/6-311+G(d,p)

| Center Number | Atomic Number | Atomic Type | Coordinates (Angstroms) |           |           | Z |
|---------------|---------------|-------------|-------------------------|-----------|-----------|---|
|               |               |             | X                       | Y         |           |   |
| 1             | 6             | 0           | 2.215164                | -1.762124 | -0.598121 |   |
| 2             | 6             | 0           | 1.120686                | -0.968162 | -0.937176 |   |
| 3             | 6             | 0           | 1.177065                | 0.403183  | -0.784220 |   |
| 4             | 6             | 0           | 2.344778                | 0.982284  | -0.280452 |   |
| 5             | 6             | 0           | 3.436609                | 0.203357  | 0.063654  |   |
| 6             | 6             | 0           | 3.374337                | -1.195011 | -0.098827 |   |
| 7             | 1             | 0           | 2.145628                | -2.833256 | -0.725401 |   |
| 8             | 1             | 0           | 0.221113                | -1.439021 | -1.312929 |   |
| 9             | 1             | 0           | 2.392881                | 2.054393  | -0.152409 |   |
| 10            | 6             | 0           | -1.366883               | 0.674979  | -0.854635 |   |
| 11            | 6             | 0           | -1.716218               | 0.521494  | 0.491905  |   |
| 12            | 6             | 0           | -2.253920               | 0.281480  | -1.831368 |   |
| 13            | 6             | 0           | -2.935662               | -0.016639 | 0.850019  |   |
| 14            | 1             | 0           | -1.015742               | 0.831589  | 1.255256  |   |
| 15            | 6             | 0           | -3.490559               | -0.270252 | -1.483519 |   |
| 16            | 1             | 0           | -2.002080               | 0.398159  | -2.878991 |   |
| 17            | 6             | 0           | -3.841856               | -0.423870 | -0.156931 |   |
| 18            | 1             | 0           | -4.171749               | -0.572510 | -2.266189 |   |
| 19            | 6             | 0           | 0.094592                | 2.637683  | -0.729694 |   |
| 20            | 7             | 0           | 0.182405                | 3.714571  | -0.343508 |   |
| 21            | 8             | 0           | 4.482586                | -1.882854 | 0.262446  |   |
| 22            | 8             | 0           | -5.010810               | -0.942343 | 0.281984  |   |
| 23            | 6             | 0           | 4.471642                | -3.287429 | 0.119635  |   |
| 24            | 1             | 0           | 4.330498                | -3.581978 | -0.925114 |   |
| 25            | 1             | 0           | 5.445784                | -3.630065 | 0.461180  |   |
| 26            | 1             | 0           | 3.690908                | -3.745859 | 0.734862  |   |
| 27            | 6             | 0           | -5.962114               | -1.350051 | -0.678811 |   |
| 28            | 1             | 0           | -6.814548               | -1.722856 | -0.115615 |   |
| 29            | 1             | 0           | -6.280685               | -0.511085 | -1.305319 |   |
| 30            | 1             | 0           | -5.570055               | -2.150449 | -1.314274 |   |
| 31            | 6             | 0           | -0.012389               | 1.260949  | -1.225799 |   |
| 32            | 1             | 0           | 0.019894                | 1.340591  | -2.317463 |   |
| 33            | 8             | 0           | -3.355919               | -0.195835 | 2.121652  |   |
| 34            | 6             | 0           | -2.502953               | 0.215236  | 3.171548  |   |
| 35            | 1             | 0           | -3.036947               | -0.006310 | 4.092652  |   |
| 36            | 1             | 0           | -1.558819               | -0.337884 | 3.157745  |   |
| 37            | 1             | 0           | -2.297364               | 1.288623  | 3.119794  |   |
| 38            | 8             | 0           | 4.596391                | 0.687758  | 0.562744  |   |
| 39            | 6             | 0           | 4.717572                | 2.084904  | 0.742406  |   |
| 40            | 1             | 0           | 3.973369                | 2.463380  | 1.449521  |   |
| 41            | 1             | 0           | 5.714243                | 2.247162  | 1.146224  |   |
| 42            | 1             | 0           | 4.619514                | 2.619494  | -0.207263 |   |

1.5. **DAAN radical geometries of  $D_0$  state optimized with UCAM-B3LYP/6-311+G(d,p)**

1.5.1. **DAAN-H/H of  $D_0$  state optimized with UCAM-B3LYP/6-311+G(d,p)**

| Center Number | Atomic Number | Atomic Type | Coordinates (Angstroms) |           |           | Z |
|---------------|---------------|-------------|-------------------------|-----------|-----------|---|
|               |               |             | X                       | Y         |           |   |
| 1             | 6             | 0           | 3.676066                | 0.179538  | 0.421496  |   |
| 2             | 6             | 0           | 2.437950                | 0.793688  | 0.456374  |   |
| 3             | 6             | 0           | 1.292416                | 0.136225  | -0.025228 |   |
| 4             | 6             | 0           | 1.449232                | -1.149165 | -0.571624 |   |
| 5             | 6             | 0           | 2.692777                | -1.754602 | -0.609905 |   |
| 6             | 6             | 0           | 3.810664                | -1.099373 | -0.107025 |   |
| 7             | 1             | 0           | 4.542973                | 0.701594  | 0.807854  |   |
| 8             | 1             | 0           | 2.343976                | 1.791695  | 0.866826  |   |
| 9             | 1             | 0           | 0.595933                | -1.656340 | -1.000989 |   |
| 10            | 1             | 0           | 2.793403                | -2.740585 | -1.047421 |   |
| 11            | 6             | 0           | 0.000006                | 0.802444  | -0.000017 |   |

|    |   |   |           |           |           |
|----|---|---|-----------|-----------|-----------|
| 12 | 6 | 0 | -1.292414 | 0.136229  | 0.025225  |
| 13 | 6 | 0 | -2.437921 | 0.793634  | -0.456513 |
| 14 | 6 | 0 | -1.449256 | -1.149086 | 0.571783  |
| 15 | 6 | 0 | -3.676041 | 0.179492  | -0.421610 |
| 16 | 1 | 0 | -2.343924 | 1.791587  | -0.867090 |
| 17 | 6 | 0 | -2.692805 | -1.754515 | 0.610089  |
| 18 | 1 | 0 | -0.595975 | -1.656206 | 1.001250  |
| 19 | 6 | 0 | -3.810666 | -1.099347 | 0.107074  |
| 20 | 1 | 0 | -4.542930 | 0.701500  | -0.808074 |
| 21 | 1 | 0 | -2.793454 | -2.740440 | 1.047731  |
| 22 | 6 | 0 | 0.000002  | 2.214220  | -0.000052 |
| 23 | 7 | 0 | -0.000007 | 3.369371  | -0.000080 |
| 24 | 1 | 0 | 4.782158  | -1.577364 | -0.137413 |
| 25 | 1 | 0 | -4.782164 | -1.577332 | 0.137482  |

1.5.2. **DAAN-H/Me of  $D_0$  state optimized with UCAM-B3LYP/6-311+G(d,p)**

| Center Number | Atomic Number | Atomic Type | Coordinates (Angstroms) |           |           | Z |
|---------------|---------------|-------------|-------------------------|-----------|-----------|---|
|               |               |             | X                       | Y         |           |   |
| 1             | 6             | 0           | 4.073782                | -0.163410 | -0.454670 |   |
| 2             | 6             | 0           | 4.067805                | -1.442877 | 0.089082  |   |
| 3             | 6             | 0           | 2.889423                | -1.957674 | 0.616261  |   |
| 4             | 6             | 0           | 1.723903                | -1.212120 | 0.587239  |   |
| 5             | 6             | 0           | 1.708432                | 0.075714  | 0.025756  |   |
| 6             | 6             | 0           | 2.914432                | 0.589733  | -0.480604 |   |
| 7             | 1             | 0           | 4.989213                | 0.250194  | -0.860070 |   |
| 8             | 1             | 0           | 2.881719                | -2.943397 | 1.065820  |   |
| 9             | 1             | 0           | 0.824293                | -1.611260 | 1.035765  |   |
| 10            | 1             | 0           | 2.930364                | 1.587086  | -0.902993 |   |
| 11            | 6             | 0           | 0.500147                | 0.887596  | 0.008861  |   |
| 12            | 6             | 0           | -0.857925               | 0.376837  | -0.009146 |   |
| 13            | 6             | 0           | -1.169777               | -0.891865 | -0.526377 |   |
| 14            | 6             | 0           | -1.925539               | 1.171084  | 0.446441  |   |
| 15            | 6             | 0           | -2.475794               | -1.344628 | -0.558313 |   |
| 16            | 1             | 0           | -0.385277               | -1.508829 | -0.943195 |   |
| 17            | 6             | 0           | -3.224254               | 0.704369  | 0.415663  |   |
| 18            | 1             | 0           | -1.722656               | 2.162800  | 0.832315  |   |
| 19            | 6             | 0           | -3.527905               | -0.564985 | -0.079341 |   |
| 20            | 1             | 0           | -2.686323               | -2.321605 | -0.979438 |   |
| 21            | 1             | 0           | -4.023785               | 1.339299  | 0.781329  |   |
| 22            | 6             | 0           | 0.666249                | 2.289790  | 0.008513  |   |
| 23            | 7             | 0           | 0.802461                | 3.436925  | 0.008464  |   |
| 24            | 1             | 0           | 4.977785                | -2.029929 | 0.112425  |   |
| 25            | 6             | 0           | -4.941055               | -1.075802 | -0.083908 |   |
| 26            | 1             | 0           | -5.082025               | -1.849980 | -0.839372 |   |
| 27            | 1             | 0           | -5.198987               | -1.510845 | 0.886263  |   |
| 28            | 1             | 0           | -5.653084               | -0.272581 | -0.280844 |   |

1.5.3. **DAAN-H/OMe of  $D_0$  state optimized with UCAM-B3LYP/6-311+G(d,p)**

| Center Number | Atomic Number | Atomic Type | Coordinates (Angstroms) |           |           | Z |
|---------------|---------------|-------------|-------------------------|-----------|-----------|---|
|               |               |             | X                       | Y         |           |   |
| 1             | 6             | 0           | -4.466481               | -0.181664 | -0.439149 |   |
| 2             | 6             | 0           | -3.310687               | 0.576994  | -0.475176 |   |
| 3             | 6             | 0           | -2.101002               | 0.073690  | 0.031700  |   |
| 4             | 6             | 0           | -2.108479               | -1.208912 | 0.604056  |   |
| 5             | 6             | 0           | -3.270110               | -1.960600 | 0.642710  |   |
| 6             | 6             | 0           | -4.452687               | -1.456502 | 0.114960  |   |
| 7             | 1             | 0           | -5.385208               | 0.224174  | -0.845057 |   |
| 8             | 1             | 0           | -3.332903               | 1.570773  | -0.905747 |   |
| 9             | 1             | 0           | -1.205897               | -1.599671 | 1.054326  |   |
| 10            | 1             | 0           | -3.255702               | -2.942490 | 1.100506  |   |
| 11            | 6             | 0           | -0.895547               | 0.892414  | 0.004274  |   |
| 12            | 6             | 0           | 0.461537                | 0.389652  | -0.034097 |   |
| 13            | 6             | 0           | 1.533778                | 1.191844  | 0.386438  |   |
| 14            | 6             | 0           | 0.774190                | -0.890086 | -0.539608 |   |
| 15            | 6             | 0           | 2.842549                | 0.744271  | 0.342873  |   |
| 16            | 1             | 0           | 1.334047                | 2.187160  | 0.764380  |   |
| 17            | 6             | 0           | 2.072058                | -1.339728 | -0.592442 |   |
| 18            | 1             | 0           | -0.014610               | -1.519228 | -0.928682 |   |
| 19            | 6             | 0           | 3.120783                | -0.531719 | -0.143008 |   |
| 20            | 1             | 0           | 3.633204                | 1.395304  | 0.687929  |   |
| 21            | 1             | 0           | 2.310309                | -2.315766 | -0.995731 |   |
| 22            | 6             | 0           | -1.069972               | 2.293475  | 0.017421  |   |
| 23            | 7             | 0           | -1.209605               | 3.440245  | 0.029345  |   |
| 24            | 8             | 0           | 4.359218                | -1.066374 | -0.229319 |   |
| 25            | 6             | 0           | 5.466330                | -0.290124 | 0.190815  |   |
| 26            | 1             | 0           | 6.344414                | -0.910982 | 0.030333  |   |
| 27            | 1             | 0           | 5.556002                | 0.624994  | -0.401347 |   |
| 28            | 1             | 0           | 5.391845                | -0.035034 | 1.251771  |   |
| 29            | 1             | 0           | -5.359575               | -2.047982 | 0.145843  |   |

1.5.4. **DAAN-Me/OMe of  $D_0$  state optimized with UCAM-B3LYP/6-311+G(d,p)**

| Center Number | Atomic Number | Atomic Type | Coordinates (Angstroms) |           |           | Z |
|---------------|---------------|-------------|-------------------------|-----------|-----------|---|
|               |               |             | X                       | Y         |           |   |
| 1             | 6             | 0           | -4.076543               | 0.367150  | -0.430181 |   |
| 2             | 6             | 0           | -2.856785               | 1.013948  | -0.463277 |   |
| 3             | 6             | 0           | -1.691731               | 0.390311  | 0.014821  |   |
| 4             | 6             | 0           | -1.823822               | -0.898305 | 0.556399  |   |

|    |   |   |           |           |           |
|----|---|---|-----------|-----------|-----------|
| 5  | 6 | 0 | -3.052280 | -1.533373 | 0.589792  |
| 6  | 6 | 0 | -4.200569 | -0.922227 | 0.088884  |
| 7  | 1 | 0 | -4.955215 | 0.874451  | -0.813396 |
| 8  | 1 | 0 | -2.794166 | 2.016926  | -0.868041 |
| 9  | 1 | 0 | -0.963229 | -1.387902 | 0.992171  |
| 10 | 1 | 0 | -3.124332 | -2.521986 | 1.030015  |
| 11 | 6 | 0 | -0.417227 | 1.090958  | -0.005857 |
| 12 | 6 | 0 | 0.888694  | 0.462872  | -0.040662 |
| 13 | 6 | 0 | 2.026245  | 1.152545  | 0.404793  |
| 14 | 6 | 0 | 1.085081  | -0.831078 | -0.566354 |
| 15 | 6 | 0 | 3.287973  | 0.584420  | 0.365291  |
| 16 | 1 | 0 | 1.916841  | 2.155674  | 0.798759  |
| 17 | 6 | 0 | 2.335654  | -1.400521 | -0.615117 |
| 18 | 1 | 0 | 0.244865  | -1.375753 | -0.974829 |
| 19 | 6 | 0 | 3.450398  | -0.703225 | -0.141025 |
| 20 | 1 | 0 | 4.132370  | 1.152139  | 0.729667  |
| 21 | 1 | 0 | 2.485286  | -2.387521 | -1.034096 |
| 22 | 6 | 0 | -0.457000 | 2.502317  | 0.011568  |
| 23 | 7 | 0 | -0.486414 | 3.657228  | 0.026843  |
| 24 | 8 | 0 | 4.634653  | -1.350904 | -0.225559 |
| 25 | 6 | 0 | 5.804389  | -0.689082 | 0.218923  |
| 26 | 1 | 0 | 6.622671  | -1.386177 | 0.055139  |
| 27 | 1 | 0 | 5.985595  | 0.224077  | -0.355170 |
| 28 | 1 | 0 | 5.742677  | -0.446627 | 1.283723  |
| 29 | 6 | 0 | -5.526513 | -1.629955 | 0.095504  |
| 30 | 1 | 0 | -5.710308 | -2.119324 | -0.865616 |
| 31 | 1 | 0 | -5.563148 | -2.399111 | 0.868273  |
| 32 | 1 | 0 | -6.348010 | -0.932761 | 0.268967  |

1.5.5. **DAAN-OMe/OMe** of D<sub>0</sub> state optimized with UCAM-B3LYP/6-311+G(d,p)

| Center Number | Atomic Number | Atomic Type | Coordinates (Angstroms) |           |           |
|---------------|---------------|-------------|-------------------------|-----------|-----------|
|               |               |             | X                       | Y         | Z         |
| 1             | 6             | 0           | 3.692014                | 0.529648  | 0.359914  |
| 2             | 6             | 0           | 2.446138                | 1.132239  | 0.406011  |
| 3             | 6             | 0           | 1.289810                | 0.477616  | -0.041388 |
| 4             | 6             | 0           | 1.449144                | -0.817087 | -0.575835 |
| 5             | 6             | 0           | 2.683524                | -1.421266 | -0.630680 |
| 6             | 6             | 0           | 3.817835                | -0.758436 | -0.154779 |
| 7             | 1             | 0           | 4.552421                | 1.071643  | 0.726003  |
| 8             | 1             | 0           | 2.365305                | 2.135517  | 0.806534  |
| 9             | 1             | 0           | 0.593664                | -1.335540 | -0.987099 |
| 10            | 1             | 0           | 2.804508                | -2.409387 | -1.056227 |
| 11            | 6             | 0           | -1.289782               | 0.477604  | 0.041275  |
| 12            | 6             | 0           | -2.446099               | 1.132141  | -0.406271 |
| 13            | 6             | 0           | -1.449119               | -0.817013 | 0.575926  |
| 14            | 6             | 0           | -3.691971               | 0.529544  | -0.360118 |
| 15            | 1             | 0           | -2.365262               | 2.135354  | -0.806957 |
| 16            | 6             | 0           | -2.683494               | -1.421197 | 0.630829  |
| 17            | 1             | 0           | -0.593645               | -1.335389 | 0.987301  |
| 18            | 6             | 0           | -3.817795               | -0.758457 | 0.154783  |
| 19            | 1             | 0           | -4.552371               | 1.071468  | -0.726328 |
| 20            | 1             | 0           | -2.804482               | -2.409250 | 1.056534  |
| 21            | 6             | 0           | 0.000006                | 2.553795  | -0.000171 |
| 22            | 7             | 0           | -0.000319               | 3.709361  | 0.000487  |
| 23            | 8             | 0           | 4.984099                | -1.438563 | -0.245820 |
| 24            | 8             | 0           | -4.984055               | -1.438583 | 0.245892  |
| 25            | 6             | 0           | 6.171797                | -0.812260 | 0.201490  |
| 26            | 1             | 0           | 6.118104                | -0.575141 | 1.267988  |
| 27            | 1             | 0           | 6.970596                | -1.530365 | 0.032159  |
| 28            | 1             | 0           | 6.377668                | 0.099513  | -0.366581 |
| 29            | 6             | 0           | -6.171753               | -0.812341 | -0.201502 |
| 30            | 1             | 0           | -6.970556               | -1.530414 | -0.032049 |
| 31            | 1             | 0           | -6.377610               | 0.099523  | 0.366428  |
| 32            | 1             | 0           | -6.118072               | -0.575390 | -1.268038 |
| 33            | 6             | 0           | 0.000014                | 1.142052  | -0.000094 |

1.5.6. **DAAN-SMe/OMe** of D<sub>0</sub> state optimized with UCAM-B3LYP/6-311+G(d,p)

| Center Number | Atomic Number | Atomic Type | Coordinates (Angstroms) |           |           |
|---------------|---------------|-------------|-------------------------|-----------|-----------|
|               |               |             | X                       | Y         | Z         |
| 1             | 6             | 0           | 3.319204                | 0.734346  | 0.340016  |
| 2             | 6             | 0           | 2.057161                | 1.297056  | 0.379955  |
| 3             | 6             | 0           | 0.920331                | 0.588994  | -0.041626 |
| 4             | 6             | 0           | 1.123075                | -0.712116 | -0.541215 |
| 5             | 6             | 0           | 2.380414                | -1.271929 | -0.588272 |
| 6             | 6             | 0           | 3.500148                | -0.562750 | -0.138488 |
| 7             | 1             | 0           | 4.159543                | 1.318906  | 0.687586  |
| 8             | 1             | 0           | 1.944141                | 2.307521  | 0.753840  |
| 9             | 1             | 0           | 0.285751                | -1.272748 | -0.933863 |
| 10            | 1             | 0           | 2.505869                | -2.269312 | -0.993841 |
| 11            | 6             | 0           | -1.657181               | 0.499787  | 0.040895  |
| 12            | 6             | 0           | -2.832054               | 1.106266  | -0.425254 |
| 13            | 6             | 0           | -1.775782               | -0.787995 | 0.601831  |
| 14            | 6             | 0           | -4.057163               | 0.463239  | -0.373217 |
| 15            | 1             | 0           | -2.782577               | 2.103374  | -0.845759 |
| 16            | 6             | 0           | -2.989410               | -1.431944 | 0.663204  |
| 17            | 1             | 0           | -0.906008               | -1.268394 | 1.029013  |
| 18            | 6             | 0           | -4.142553               | -0.817629 | 0.167440  |
| 19            | 1             | 0           | -4.933164               | 0.968271  | -0.754768 |
| 20            | 1             | 0           | -3.079872               | -2.414274 | 1.109187  |
| 21            | 6             | 0           | -0.439793               | 2.618532  | -0.026072 |
| 22            | 7             | 0           | -0.481603               | 3.773009  | -0.042151 |

|    |    |   |           |           |           |
|----|----|---|-----------|-----------|-----------|
| 23 | 8  | 0 | -5.285278 | -1.534306 | 0.266796  |
| 24 | 6  | 0 | 6.227686  | -0.156242 | 0.374771  |
| 25 | 1  | 0 | 6.026595  | 0.110496  | 1.411725  |
| 26 | 1  | 0 | 7.206293  | -0.631243 | 0.319800  |
| 27 | 1  | 0 | 6.235370  | 0.734278  | -0.252776 |
| 28 | 6  | 0 | -6.491008 | -0.959263 | -0.201461 |
| 29 | 1  | 0 | -7.265408 | -1.701166 | -0.021959 |
| 30 | 1  | 0 | -6.732389 | -0.043602 | 0.345921  |
| 31 | 1  | 0 | -6.437707 | -0.743001 | -1.272346 |
| 32 | 6  | 0 | -0.390358 | 1.207168  | -0.007769 |
| 33 | 16 | 0 | 5.056919  | -1.389303 | -0.235593 |

1.5.7. **DAAN-F/F** of D<sub>0</sub> state optimized with UCAM-B3LYP/6-311+G(d,p)

| Center Number | Atomic Number | Atomic Type | Coordinates (Angstroms) |           |           |
|---------------|---------------|-------------|-------------------------|-----------|-----------|
|               |               |             | X                       | Y         | Z         |
| 1             | 6             | 0           | -3.674077               | 0.417552  | -0.463917 |
| 2             | 6             | 0           | -2.433107               | 1.024142  | -0.482138 |
| 3             | 6             | 0           | -1.291413               | 0.367226  | 0.010847  |
| 4             | 6             | 0           | -1.454849               | -0.918551 | 0.555031  |
| 5             | 6             | 0           | -2.693833               | -1.531657 | 0.583106  |
| 6             | 6             | 0           | -3.781844               | -0.855325 | 0.064606  |
| 7             | 1             | 0           | -4.553649               | 0.914918  | -0.851043 |
| 8             | 1             | 0           | -2.337485               | 2.022368  | -0.890923 |
| 9             | 1             | 0           | -0.608324               | -1.427262 | 0.995298  |
| 10            | 1             | 0           | -2.829385               | -2.515196 | 1.013640  |
| 11            | 6             | 0           | 1.291408                | 0.367222  | -0.010800 |
| 12            | 6             | 0           | 2.433099                | 1.024077  | 0.482270  |
| 13            | 6             | 0           | 1.454843                | -0.918491 | -0.555134 |
| 14            | 6             | 0           | 3.674068                | 0.417486  | 0.463987  |
| 15            | 1             | 0           | 2.337476                | 2.022256  | 0.891171  |
| 16            | 6             | 0           | 2.693826                | -1.531598 | -0.583272 |
| 17            | 1             | 0           | 0.608319                | -1.427148 | -0.995466 |
| 18            | 6             | 0           | 3.781835                | -0.855329 | -0.064686 |
| 19            | 1             | 0           | 4.553638                | 0.914805  | 0.851177  |
| 20            | 1             | 0           | 2.829378                | -2.515086 | -1.013921 |
| 21            | 6             | 0           | 0.000004                | 2.445328  | 0.000137  |
| 22            | 7             | 0           | 0.000056                | 3.600465  | 0.000110  |
| 23            | 6             | 0           | -0.000002               | 1.034248  | 0.000058  |
| 24            | 9             | 0           | -4.986998               | -1.450603 | 0.086434  |
| 25            | 9             | 0           | 4.986988                | -1.450608 | -0.086576 |

1.5.8. **DAAN-F/OMe** of D<sub>0</sub> state optimized with UCAM-B3LYP/6-311+G(d,p)

| Center Number | Atomic Number | Atomic Type | Coordinates (Angstroms) |           |           |
|---------------|---------------|-------------|-------------------------|-----------|-----------|
|               |               |             | X                       | Y         | Z         |
| 1             | 6             | 0           | 4.101789                | 0.309647  | -0.463933 |
| 2             | 6             | 0           | 2.884074                | 0.962985  | -0.487012 |
| 3             | 6             | 0           | 1.720052                | 0.357043  | 0.015773  |
| 4             | 6             | 0           | 1.835643                | -0.926506 | 0.574627  |
| 5             | 6             | 0           | 3.050557                | -1.587239 | 0.607037  |
| 6             | 6             | 0           | 4.162256                | -0.959862 | 0.078707  |
| 7             | 1             | 0           | 4.998684                | 0.768892  | -0.858474 |
| 8             | 1             | 0           | 2.825761                | 1.959569  | -0.906810 |
| 9             | 1             | 0           | 0.970772                | -1.396661 | 1.022157  |
| 10            | 1             | 0           | 3.148665                | -2.570437 | 1.048507  |
| 11            | 6             | 0           | -0.858839               | 0.460748  | -0.037411 |
| 12            | 6             | 0           | -1.990954               | 1.166580  | 0.398530  |
| 13            | 6             | 0           | -1.067673               | -0.834612 | -0.556318 |
| 14            | 6             | 0           | -3.258249               | 0.612577  | 0.356898  |
| 15            | 1             | 0           | -1.871838               | 2.170653  | 0.787182  |
| 16            | 6             | 0           | -2.324006               | -1.389837 | -0.607194 |
| 17            | 1             | 0           | -0.232900               | -1.391718 | -0.959341 |
| 18            | 6             | 0           | -3.433142               | -0.676630 | -0.142397 |
| 19            | 1             | 0           | -4.097886               | 1.191846  | 0.713876  |
| 20            | 1             | 0           | -2.483295               | -2.377383 | -1.021160 |
| 21            | 6             | 0           | 0.512087                | 2.484073  | 0.024552  |
| 22            | 7             | 0           | 0.562610                | 3.638148  | 0.043453  |
| 23            | 8             | 0           | -4.622979               | -1.310973 | -0.228108 |
| 24            | 6             | 0           | -5.788627               | -0.634236 | 0.206566  |
| 25            | 1             | 0           | -6.612774               | -1.324251 | 0.042904  |
| 26            | 1             | 0           | -5.729344               | -0.386134 | 1.270076  |
| 27            | 1             | 0           | -5.957326               | 0.276776  | -0.374470 |
| 28            | 6             | 0           | 0.451912                | 1.074046  | 0.000089  |
| 29            | 9             | 0           | 5.345086                | -1.601451 | 0.105019  |

1.5.9. **DAAN-Br/OMe** of D<sub>0</sub> state optimized with UCAM-B3LYP/6-311+G(d,p)

| Center Number | Atomic Number | Atomic Type | Coordinates (Angstroms) |           |           |
|---------------|---------------|-------------|-------------------------|-----------|-----------|
|               |               |             | X                       | Y         | Z         |
| 1             | 6             | 0           | -2.945368               | 1.071696  | -0.479432 |
| 2             | 6             | 0           | -1.649878               | 1.552817  | -0.489423 |
| 3             | 6             | 0           | -0.580415               | 0.782860  | -0.002568 |
| 4             | 6             | 0           | -0.875112               | -0.483797 | 0.527472  |
| 5             | 6             | 0           | -2.170024               | -0.969517 | 0.546400  |
| 6             | 6             | 0           | -3.199205               | -0.192705 | 0.033902  |
| 7             | 1             | 0           | -3.754459               | 1.675062  | -0.868621 |
| 8             | 1             | 0           | -1.456908               | 2.541269  | -0.887994 |
| 9             | 1             | 0           | -0.086565               | -1.080459 | 0.965345  |
| 10            | 1             | 0           | -2.381253               | -1.942015 | 0.970677  |

|    |    |   |           |           |           |
|----|----|---|-----------|-----------|-----------|
| 11 | 6  | 0 | 1.988026  | 0.530790  | -0.040300 |
| 12 | 6  | 0 | 3.201009  | 1.070589  | 0.414775  |
| 13 | 6  | 0 | 2.023660  | -0.774318 | -0.575290 |
| 14 | 6  | 0 | 4.381349  | 0.349729  | 0.376640  |
| 15 | 1  | 0 | 3.215676  | 2.076749  | 0.815776  |
| 16 | 6  | 0 | 3.193093  | -1.494736 | -0.623078 |
| 17 | 1  | 0 | 1.125244  | -1.207247 | -0.993628 |
| 18 | 6  | 0 | 4.384077  | -0.945193 | -0.138537 |
| 19 | 1  | 0 | 5.288263  | 0.804639  | 0.748768  |
| 20 | 1  | 0 | 3.220853  | -2.489418 | -1.049422 |
| 21 | 6  | 0 | 0.907719  | 2.722598  | 0.029894  |
| 22 | 7  | 0 | 1.019074  | 3.871999  | 0.058897  |
| 23 | 8  | 0 | 5.476868  | -1.734486 | -0.222588 |
| 24 | 6  | 0 | 6.719305  | -1.229565 | 0.233028  |
| 25 | 1  | 0 | 7.442820  | -2.024090 | 0.067738  |
| 26 | 1  | 0 | 7.017974  | -0.343157 | -0.333558 |
| 27 | 1  | 0 | 6.682007  | -0.989143 | 1.299257  |
| 28 | 6  | 0 | 0.773119  | 1.317360  | -0.005863 |
| 29 | 35 | 0 | -4.976293 | -0.860055 | 0.051096  |

1.5.10. **DAAN-Ac/OMe** of D<sub>0</sub> state optimized with UCAM-B3LYP/6-311+G(d,p)

| Center Number | Atomic Number | Atomic Type | Coordinates (Angstroms) |           |           | Z |
|---------------|---------------|-------------|-------------------------|-----------|-----------|---|
|               |               |             | X                       | Y         |           |   |
| 1             | 6             | 0           | -3.385096               | 0.858758  | 0.406440  |   |
| 2             | 6             | 0           | -2.113812               | 1.398599  | 0.417934  |   |
| 3             | 6             | 0           | -1.008576               | 0.655086  | -0.029769 |   |
| 4             | 6             | 0           | -1.244777               | -0.642729 | -0.521478 |   |
| 5             | 6             | 0           | -2.517257               | -1.172491 | -0.535682 |   |
| 6             | 6             | 0           | -3.605954               | -0.436409 | -0.063677 |   |
| 7             | 1             | 0           | -4.209602               | 1.458430  | 0.770105  |   |
| 8             | 1             | 0           | -1.963440               | 2.406276  | 0.785048  |   |
| 9             | 1             | 0           | -0.425631               | -1.217676 | -0.931071 |   |
| 10            | 1             | 0           | -2.699742               | -2.165732 | -0.925741 |   |
| 11            | 6             | 0           | 1.567568                | 0.511414  | 0.030773  |   |
| 12            | 6             | 0           | 2.758005                | 1.094877  | -0.430317 |   |
| 13            | 6             | 0           | 1.657592                | -0.778884 | 0.594998  |   |
| 14            | 6             | 0           | 3.968492                | 0.427846  | -0.372071 |   |
| 15            | 1             | 0           | 2.730408                | 2.091740  | -0.853220 |   |
| 16            | 6             | 0           | 2.857199                | -1.445328 | 0.663704  |   |
| 17            | 1             | 0           | 0.776906                | -1.242257 | 1.018095  |   |
| 18            | 6             | 0           | 4.025345                | -0.854277 | 0.171753  |   |
| 19            | 1             | 0           | 4.856386                | 0.913828  | -0.750652 |   |
| 20            | 1             | 0           | 2.926619                | -2.428386 | 1.111621  |   |
| 21            | 6             | 0           | 0.397071                | 2.653440  | -0.085456 |   |
| 22            | 7             | 0           | 0.462419                | 3.805296  | -0.136291 |   |
| 23            | 8             | 0           | 5.150783                | -1.592071 | -0.277830 |   |
| 24            | 6             | 0           | 6.372419                | -1.044346 | -0.185268 |   |
| 25            | 1             | 0           | 7.128608                | -1.803048 | 0.000570  |   |
| 26            | 1             | 0           | 6.329063                | -0.830250 | -1.256805 |   |
| 27            | 1             | 0           | 6.630070                | -0.133321 | 0.361996  |   |
| 28            | 6             | 0           | 0.319997                | 1.243448  | -0.025815 |   |
| 29            | 6             | 0           | -4.962651               | -1.065251 | -0.098060 |   |
| 30            | 8             | 0           | -5.102166               | -2.196731 | -0.507215 |   |
| 31            | 6             | 0           | -6.148356               | -0.266117 | 0.385578  |   |
| 32            | 1             | 0           | -6.019586               | 0.026785  | 1.430173  |   |
| 33            | 1             | 0           | -6.266105               | 0.647887  | -0.201109 |   |
| 34            | 1             | 0           | -7.043083               | -0.876739 | 0.288587  |   |

1.5.11. **DAAN-COOMe/OMe** of D<sub>0</sub> state optimized with UCAM-B3LYP/6-311+G(d,p)

| Center Number | Atomic Number | Atomic Type | Coordinates (Angstroms) |           |           | Z |
|---------------|---------------|-------------|-------------------------|-----------|-----------|---|
|               |               |             | X                       | Y         |           |   |
| 1             | 6             | 0           | 2.972413                | 0.982307  | -0.384997 |   |
| 2             | 6             | 0           | 1.687861                | 1.486878  | -0.406999 |   |
| 3             | 6             | 0           | 0.600043                | 0.721682  | 0.049379  |   |
| 4             | 6             | 0           | 0.864165                | -0.561100 | 0.561847  |   |
| 5             | 6             | 0           | 2.150634                | -1.059848 | 0.589059  |   |
| 6             | 6             | 0           | 3.214448                | -0.299257 | 0.107991  |   |
| 7             | 1             | 0           | 3.797318                | 1.578392  | -0.750454 |   |
| 8             | 1             | 0           | 1.512048                | 2.484510  | -0.789924 |   |
| 9             | 1             | 0           | 0.057877                | -1.149973 | 0.976842  |   |
| 10            | 1             | 0           | 2.355564                | -2.042152 | 0.995182  |   |
| 11            | 6             | 0           | -1.971320               | 0.511393  | -0.029831 |   |
| 12            | 6             | 0           | -3.181663               | 1.067712  | 0.412897  |   |
| 13            | 6             | 0           | -2.021558               | -0.786444 | -0.581733 |   |
| 14            | 6             | 0           | -4.373592               | 0.368514  | 0.348520  |   |
| 15            | 1             | 0           | -3.184742               | 2.069092  | 0.825881  |   |
| 16            | 6             | 0           | -3.202539               | -1.484881 | -0.656244 |   |
| 17            | 1             | 0           | -1.124379               | -1.230590 | -0.990550 |   |
| 18            | 6             | 0           | -4.391013               | -0.919882 | -0.182887 |   |
| 19            | 1             | 0           | -5.277981               | 0.834755  | 0.712687  |   |
| 20            | 1             | 0           | -3.241325               | -2.473813 | -1.094871 |   |
| 21            | 6             | 0           | -0.858289               | 2.683911  | 0.081989  |   |
| 22            | 7             | 0           | -0.955124               | 3.833910  | 0.124933  |   |
| 23            | 8             | 0           | -5.495857               | -1.688024 | -0.293476 |   |
| 24            | 6             | 0           | -6.736188               | -1.167087 | 0.150047  |   |
| 25            | 1             | 0           | -7.470681               | -1.946727 | -0.036260 |   |
| 26            | 1             | 0           | -6.710725               | -0.940911 | 1.219699  |   |
| 27            | 1             | 0           | -7.010695               | -0.268556 | -0.409575 |   |
| 28            | 6             | 0           | -0.744094               | 1.276344  | -0.031940 |   |
| 29            | 6             | 0           | 4.576879                | -0.890111 | 0.157104  |   |

|    |   |   |          |           |           |
|----|---|---|----------|-----------|-----------|
| 30 | 8 | 0 | 4.824806 | -1.992445 | 0.576089  |
| 31 | 8 | 0 | 5.516465 | -0.061013 | -0.319459 |
| 32 | 6 | 0 | 6.856284 | -0.562449 | -0.302793 |
| 33 | 1 | 0 | 7.471137 | 0.231529  | -0.718073 |
| 34 | 1 | 0 | 7.162721 | -0.792504 | 0.717381  |
| 35 | 1 | 0 | 6.931585 | -1.464628 | -0.909453 |

1.5.12. **DAAN-CN/OMe** of D<sub>0</sub> state optimized with UCAM-B3LYP/6-311+G(d,p)

| Center Number | Atomic Number | Atomic Type | Coordinates (Angstroms) |           |           | Z |
|---------------|---------------|-------------|-------------------------|-----------|-----------|---|
|               |               |             | X                       | Y         |           |   |
| 1             | 6             | 0           | 3.841191                | 0.633226  | -0.445032 |   |
| 2             | 6             | 0           | 2.591616                | 1.215328  | -0.465008 |   |
| 3             | 6             | 0           | 1.460157                | 0.526091  | 0.007512  |   |
| 4             | 6             | 0           | 1.646471                | -0.763888 | 0.535137  |   |
| 5             | 6             | 0           | 2.896649                | -1.346810 | 0.563358  |   |
| 6             | 6             | 0           | 4.003744                | -0.657452 | 0.064164  |   |
| 7             | 1             | 0           | 4.699800                | 1.172566  | -0.823566 |   |
| 8             | 1             | 0           | 2.478087                | 2.217427  | -0.859133 |   |
| 9             | 1             | 0           | 0.807810                | -1.295572 | 0.962443  |   |
| 10            | 1             | 0           | 3.027088                | -2.335233 | 0.984847  |   |
| 11            | 6             | 0           | -1.118745               | 0.477351  | -0.041446 |   |
| 12            | 6             | 0           | -2.284431               | 1.115992  | 0.410764  |   |
| 13            | 6             | 0           | -1.259616               | -0.821854 | -0.574726 |   |
| 14            | 6             | 0           | -3.518710               | 0.493362  | 0.374076  |   |
| 15            | 1             | 0           | -2.217451               | 2.120970  | 0.809341  |   |
| 16            | 6             | 0           | -2.483202               | -1.444494 | -0.622131 |   |
| 17            | 1             | 0           | -0.399940               | -1.326982 | -0.993521 |   |
| 18            | 6             | 0           | -3.626139               | -0.798680 | -0.138665 |   |
| 19            | 1             | 0           | -4.386013               | 1.020825  | 0.744708  |   |
| 20            | 1             | 0           | -2.592156               | -2.433900 | -1.047577 |   |
| 21            | 6             | 0           | 0.132044                | 2.576713  | 0.017514  |   |
| 22            | 7             | 0           | 0.112889                | 3.731012  | 0.039048  |   |
| 23            | 8             | 0           | -4.777568               | -1.495834 | -0.221961 |   |
| 24            | 6             | 0           | -5.977322               | -0.892138 | 0.230703  |   |
| 25            | 1             | 0           | -6.761122               | -1.626958 | 0.064947  |   |
| 26            | 1             | 0           | -5.922336               | -0.654267 | 1.296564  |   |
| 27            | 1             | 0           | -6.202638               | 0.013949  | -0.338331 |   |
| 28            | 6             | 0           | 0.154213                | 1.163915  | -0.007714 |   |
| 29            | 6             | 0           | 5.298259                | -1.265416 | 0.086930  |   |
| 30            | 7             | 0           | 6.337447                | -1.755816 | 0.104146  |   |

1.5.13. **DAAN-NO<sub>2</sub>/OMe** of D<sub>0</sub> state optimized with UCAM-B3LYP/6-311+G(d,p)

| Center Number | Atomic Number | Atomic Type | Coordinates (Angstroms) |           |           | Z |
|---------------|---------------|-------------|-------------------------|-----------|-----------|---|
|               |               |             | X                       | Y         |           |   |
| 1             | 6             | 0           | 3.419917                | 0.869487  | -0.447728 |   |
| 2             | 6             | 0           | 2.146491                | 1.401371  | -0.449615 |   |
| 3             | 6             | 0           | 1.047871                | 0.659699  | 0.020531  |   |
| 4             | 6             | 0           | 1.284671                | -0.630548 | 0.527689  |   |
| 5             | 6             | 0           | 2.556191                | -1.167917 | 0.539475  |   |
| 6             | 6             | 0           | 3.607014                | -0.414344 | 0.040891  |   |
| 7             | 1             | 0           | 4.266381                | 1.429629  | -0.818659 |   |
| 8             | 1             | 0           | 1.990952                | 2.403900  | -0.827226 |   |
| 9             | 1             | 0           | 0.469566                | -1.198883 | 0.952916  |   |
| 10            | 1             | 0           | 2.748716                | -2.153202 | 0.936335  |   |
| 11            | 6             | 0           | -1.527001               | 0.513812  | -0.029047 |   |
| 12            | 6             | 0           | -2.719712               | 1.101911  | 0.423371  |   |
| 13            | 6             | 0           | -1.615276               | -0.782563 | -0.581692 |   |
| 14            | 6             | 0           | -3.928924               | 0.434102  | 0.368748  |   |
| 15            | 1             | 0           | -2.693443               | 2.102770  | 0.836682  |   |
| 16            | 6             | 0           | -2.813905               | -1.449568 | -0.646973 |   |
| 17            | 1             | 0           | -0.734584               | -1.249508 | -1.000954 |   |
| 18            | 6             | 0           | -3.983966               | -0.853930 | -0.162924 |   |
| 19            | 1             | 0           | -4.818078               | 0.923056  | 0.740294  |   |
| 20            | 1             | 0           | -2.882679               | -2.462331 | -1.086839 |   |
| 21            | 6             | 0           | -0.357755               | 2.656886  | 0.087618  |   |
| 22            | 7             | 0           | -0.419505               | 3.808573  | 0.140127  |   |
| 23            | 8             | 0           | -5.106919               | -1.592337 | -0.264472 |   |
| 24            | 6             | 0           | -6.332352               | -1.042309 | 0.188947  |   |
| 25            | 1             | 0           | -7.085662               | -1.804717 | 0.007534  |   |
| 26            | 1             | 0           | -6.292794               | -0.818097 | 1.258365  |   |
| 27            | 1             | 0           | -6.589208               | -0.137674 | -0.368789 |   |
| 28            | 6             | 0           | -0.282857               | 1.246956  | 0.023724  |   |
| 29            | 7             | 0           | 4.960846                | -0.987433 | 0.046225  |   |
| 30            | 8             | 0           | 5.867043                | -0.298191 | -0.380672 |   |
| 31            | 8             | 0           | 5.093164                | -2.117882 | 0.475704  |   |

1.5.14. **DAAN-OMe/diOMe** of D<sub>0</sub> state optimized with UCAM-B3LYP/6-311+G(d,p)

| Center Number | Atomic Number | Atomic Type | Coordinates (Angstroms) |           |           | Z |
|---------------|---------------|-------------|-------------------------|-----------|-----------|---|
|               |               |             | X                       | Y         |           |   |
| 1             | 6             | 0           | -3.987045               | 0.478836  | -0.365038 |   |
| 2             | 6             | 0           | -2.723741               | 0.997971  | -0.588256 |   |
| 3             | 6             | 0           | -1.562685               | 0.336756  | -0.153616 |   |
| 4             | 6             | 0           | -1.738793               | -0.877116 | 0.546512  |   |
| 5             | 6             | 0           | -2.990551               | -1.396698 | 0.774578  |   |
| 6             | 6             | 0           | -4.129581               | -0.728605 | -0.135488 |   |
| 7             | 1             | 0           | -4.849415               | 1.021787  | -0.725268 |   |

|    |   |   |           |           |           |
|----|---|---|-----------|-----------|-----------|
| 8  | 1 | 0 | -2.629924 | 1.938122  | -1.117684 |
| 9  | 1 | 0 | -0.874567 | -1.396980 | 0.937395  |
| 10 | 1 | 0 | -3.121489 | -2.321058 | 1.322882  |
| 11 | 6 | 0 | 0.985357  | 0.127901  | -0.304927 |
| 12 | 6 | 0 | 2.162765  | 0.665067  | 0.249298  |
| 13 | 6 | 0 | 1.062390  | -1.166263 | -0.837397 |
| 14 | 6 | 0 | 3.352647  | -0.059316 | 0.258421  |
| 15 | 6 | 0 | 2.229630  | -1.897663 | -0.833301 |
| 16 | 1 | 0 | 0.178226  | -1.589229 | -1.296910 |
| 17 | 6 | 0 | 3.382589  | -1.341071 | -0.283434 |
| 18 | 1 | 0 | 4.238653  | 0.371301  | 0.696161  |
| 19 | 1 | 0 | 2.279572  | -2.888454 | -1.264384 |
| 20 | 6 | 0 | -0.182844 | 2.258625  | -0.762516 |
| 21 | 7 | 0 | -0.170155 | 3.360582  | -1.109022 |
| 22 | 8 | 0 | -5.315409 | -1.323221 | 0.585569  |
| 23 | 8 | 0 | 4.492391  | -2.116544 | -0.317741 |
| 24 | 6 | 0 | -6.505585 | -0.687110 | 0.160251  |
| 25 | 1 | 0 | -6.533646 | -0.583973 | -0.928410 |
| 26 | 1 | 0 | -7.320631 | -1.331157 | 0.481925  |
| 27 | 1 | 0 | -6.617017 | 0.297342  | 0.623907  |
| 28 | 6 | 0 | 5.702136  | -1.605774 | 0.206035  |
| 29 | 1 | 0 | 6.444352  | -2.387338 | 0.061468  |
| 30 | 1 | 0 | 6.018074  | -0.704766 | -0.328160 |
| 31 | 1 | 0 | 5.612942  | -1.387052 | 1.274422  |
| 32 | 6 | 0 | -0.252765 | 0.901835  | -0.377433 |
| 33 | 8 | 0 | 2.051456  | 1.896041  | 0.790424  |
| 34 | 6 | 0 | 3.207082  | 2.573773  | 1.241269  |
| 35 | 1 | 0 | 3.659612  | 2.063335  | 2.096923  |
| 36 | 1 | 0 | 3.943378  | 2.676299  | 0.439187  |
| 37 | 1 | 0 | 2.869419  | 3.560660  | 1.548098  |

|    |   |   |           |           |           |
|----|---|---|-----------|-----------|-----------|
| 11 | 6 | 0 | 2.476921  | 0.565601  | 0.392688  |
| 12 | 6 | 0 | 1.314519  | -1.114361 | -0.862860 |
| 13 | 6 | 0 | 3.674723  | -0.113636 | 0.181020  |
| 14 | 6 | 0 | 2.488615  | -1.800314 | -1.074532 |
| 15 | 1 | 0 | 0.397781  | -1.494980 | -1.294264 |
| 16 | 6 | 0 | 3.678879  | -1.295284 | -0.554013 |
| 17 | 1 | 0 | 4.588554  | 0.271703  | 0.603565  |
| 18 | 1 | 0 | 2.514726  | -2.714511 | -1.652191 |
| 19 | 6 | 0 | -0.000010 | 2.217498  | -0.000400 |
| 20 | 7 | 0 | 0.000131  | 3.372802  | -0.000580 |
| 21 | 8 | 0 | -4.794916 | -2.020248 | 0.807914  |
| 22 | 8 | 0 | 4.795319  | -2.019550 | -0.808237 |
| 23 | 6 | 0 | -6.038251 | -1.555259 | 0.322317  |
| 24 | 1 | 0 | -6.046410 | -1.506639 | -0.770808 |
| 25 | 1 | 0 | -6.778951 | -2.279297 | 0.653823  |
| 26 | 1 | 0 | -6.284399 | -0.572299 | 0.734978  |
| 27 | 6 | 0 | 6.038440  | -1.554753 | -0.321915 |
| 28 | 1 | 0 | 6.779306  | -2.278577 | -0.653515 |
| 29 | 1 | 0 | 6.284699  | -0.571564 | -0.733962 |
| 30 | 1 | 0 | 6.046174  | -1.506708 | 0.771239  |
| 31 | 6 | 0 | -0.000042 | 0.805997  | -0.000287 |
| 32 | 8 | 0 | -2.399088 | 1.684383  | -1.139738 |
| 33 | 8 | 0 | 2.398521  | 1.683914  | 1.140487  |
| 34 | 6 | 0 | -3.578630 | 3.234433  | -1.580875 |
| 35 | 1 | 0 | -4.124581 | 1.704312  | -2.298716 |
| 36 | 1 | 0 | -4.230039 | 2.576642  | -0.739300 |
| 37 | 1 | 0 | -3.251745 | 3.239046  | -2.069614 |
| 38 | 6 | 0 | 3.577857  | 2.323542  | 1.582776  |
| 39 | 1 | 0 | 4.123403  | 1.702802  | 2.300389  |
| 40 | 1 | 0 | 4.229723  | 2.576429  | 0.741758  |
| 41 | 1 | 0 | 3.250757  | 3.237766  | 2.072101  |

1.5.15. **DAAN-OMe/triOMe** of D<sub>0</sub> state optimized with UCAM-B3LYP/6-311+G(d,p)

| Center Number | Atomic Number | Atomic Type | Coordinates (Angstroms) |           |           | Z |
|---------------|---------------|-------------|-------------------------|-----------|-----------|---|
|               |               |             | X                       | Y         |           |   |
| 1             | 6             | 0           | -4.016158               | 0.587526  | 0.259637  |   |
| 2             | 6             | 0           | -2.779265               | 1.002402  | 0.720531  |   |
| 3             | 6             | 0           | -1.582920               | 0.450235  | 0.229039  |   |
| 4             | 6             | 0           | -1.692568               | -0.544498 | -0.768526 |   |
| 5             | 6             | 0           | -2.916229               | -0.957888 | -1.232469 |   |
| 6             | 6             | 0           | -4.093360               | -0.399567 | -0.721053 |   |
| 7             | 1             | 0           | -4.908935               | 1.038409  | 0.669446  |   |
| 8             | 1             | 0           | -2.733290               | 1.770419  | 1.482994  |   |
| 9             | 1             | 0           | -0.792249               | -0.977361 | -1.183987 |   |
| 10            | 1             | 0           | -2.998594               | -1.714328 | -2.002787 |   |
| 11            | 6             | 0           | 0.973568                | 0.255918  | 0.341366  |   |
| 12            | 6             | 0           | 1.994479                | 0.991565  | -0.269561 |   |
| 13            | 6             | 0           | 1.239011                | -1.090293 | 0.653829  |   |
| 14            | 6             | 0           | 3.231535                | 0.424312  | -0.577835 |   |
| 15            | 6             | 0           | 2.457954                | -1.675403 | 0.349955  |   |
| 16            | 6             | 0           | 3.445688                | -0.911453 | -0.264739 |   |
| 17            | 1             | 0           | 3.995656                | 1.011594  | -1.058769 |   |
| 18            | 1             | 0           | 2.683155                | -2.703294 | 0.588627  |   |
| 19            | 6             | 0           | -0.246447               | 2.021331  | 1.548031  |   |
| 20            | 7             | 0           | -0.209875               | 2.930858  | 2.259969  |   |
| 21            | 8             | 0           | -5.249427               | -0.876653 | -1.241699 |   |
| 22            | 8             | 0           | 4.604709                | -1.566063 | -0.521966 |   |
| 23            | 6             | 0           | -6.473652               | -0.343728 | -0.774633 |   |
| 24            | 1             | 0           | -6.541688               | 0.729576  | -0.974750 |   |
| 25            | 1             | 0           | -7.255565               | -0.862831 | -1.324102 |   |
| 26            | 1             | 0           | -6.602890               | -0.524324 | 0.296541  |   |
| 27            | 6             | 0           | 5.668599                | -0.858534 | -1.127387 |   |
| 28            | 1             | 0           | 6.483713                | -1.571709 | -1.226349 |   |
| 29            | 1             | 0           | 5.389002                | -0.490676 | -2.119083 |   |
| 30            | 1             | 0           | 5.995100                | -0.021069 | -0.503894 |   |
| 31            | 6             | 0           | -0.304966               | 0.897095  | 0.698030  |   |
| 32            | 8             | 0           | 1.687347                | 2.275423  | -0.558143 |   |
| 33            | 6             | 0           | 2.691318                | 3.139448  | -1.052242 |   |
| 34            | 1             | 0           | 3.537864                | 3.197942  | -0.362535 |   |
| 35            | 1             | 0           | 3.039293                | 2.822793  | -2.040122 |   |
| 36            | 1             | 0           | 2.224812                | 4.118335  | -1.132646 |   |
| 37            | 8             | 0           | 0.242596                | -1.750658 | 1.284894  |   |
| 38            | 6             | 0           | 0.444213                | -3.098493 | 1.664064  |   |
| 39            | 1             | 0           | 0.625082                | -3.734434 | 0.792756  |   |
| 40            | 1             | 0           | 1.278255                | -3.192126 | 2.365125  |   |
| 41            | 1             | 0           | -0.476184               | -3.409170 | 2.152831  |   |

1.5.16. **DAAN-diOMe/diOMe** of D<sub>0</sub> state optimized with UCAM-B3LYP/6-311+G(d,p)

| Center Number | Atomic Number | Atomic Type | Coordinates (Angstroms) |           |           | Z |
|---------------|---------------|-------------|-------------------------|-----------|-----------|---|
|               |               |             | X                       | Y         |           |   |
| 1             | 6             | 0           | -3.674804               | -0.113730 | -0.180731 |   |
| 2             | 6             | 0           | -2.477127               | 0.565693  | -0.392478 |   |
| 3             | 6             | 0           | -1.259888               | 0.087866  | 0.137942  |   |
| 4             | 6             | 0           | -1.314153               | -1.114878 | 0.861743  |   |
| 5             | 6             | 0           | -2.488126               | -1.801002 | 1.073481  |   |
| 6             | 6             | 0           | -3.678622               | -1.295771 | 0.553671  |   |
| 7             | 1             | 0           | -4.588805               | 0.271772  | -0.602762 |   |
| 8             | 1             | 0           | -0.397246               | -1.495675 | 1.292623  |   |
| 9             | 1             | 0           | -2.513970               | -2.715505 | 1.650667  |   |
| 10            | 6             | 0           | 1.259936                | 0.087972  | -0.138441 |   |

1.5.17. **DAAN-diOMe/triOMe** of D<sub>0</sub> state optimized with UCAM-B3LYP/6-311+G(d,p)

| Center Number | Atomic Number | Atomic Type | Coordinates (Angstroms) |           |           | Z |
|---------------|---------------|-------------|-------------------------|-----------|-----------|---|
|               |               |             | X                       | Y         |           |   |
| 1             | 6             | 0           | -3.738601               | -0.025440 | -0.184749 |   |
| 2             | 6             | 0           | -2.612258               | 0.639404  | 0.288065  |   |
| 3             | 6             | 0           | -1.301616               | 0.193590  | -0.025096 |   |
| 4             | 6             | 0           | -1.212261               | -0.961317 | -0.831745 |   |
| 5             | 6             | 0           | -2.316688               | -1.626447 | -1.302787 |   |
| 6             | 6             | 0           | -3.591632               | -1.158780 | -0.980595 |   |
| 7             | 1             | 0           | -4.719801               | 0.338276  | 0.074065  |   |
| 8             | 1             | 0           | -0.227572               | -1.320647 | -1.098852 |   |
| 9             | 1             | 0           | -2.224867               | -2.504067 | -1.928750 |   |
| 10            | 6             | 0           | 1.225794                | 0.244238  | 0.234917  |   |
| 11            | 6             | 0           | 2.185613                | 0.855144  | -0.574560 |   |
| 12            | 6             | 0           | 1.596028                | -0.928317 | 0.915112  |   |
| 13            | 6             | 0           | 3.472348                | 0.331564  | -0.717371 |   |
| 14            | 6             | 0           | 2.865143                | -1.470392 | 0.782875  |   |
| 15            | 6             | 0           | 3.794738                | -0.832053 | -0.032579 |   |
| 16            | 1             | 0           | 4.191713                | 0.819095  | -1.353739 |   |
| 17            | 1             | 0           | 3.171551                | -2.365028 | 1.302517  |   |
| 18            | 6             | 0           | -0.097281               | 2.125660  | 1.025407  |   |
| 19            | 7             | 0           | 0.029492                | 3.160278  | 1.525844  |   |
| 20            | 8             | 0           | -4.631541               | -1.866544 | -1.484221 |   |
| 21            | 8             | 0           | 5.011188                | -1.430086 | -0.099033 |   |
| 22            | 6             | 0           | -5.949413               | -1.440103 | -1.203465 |   |
| 23            | 1             | 0           | -6.133427               | -0.433731 | -1.591447 |   |
| 24            | 1             | 0           | -6.606438               | -2.144686 | -1.708175 |   |
| 25            | 1             | 0           | -6.154990               | -1.461891 | -0.128959 |   |
| 26            | 6             | 0           | 6.020491                | -0.834918 | -0.889166 |   |
| 27            | 1             | 0           | 6.896400                | -1.471286 | -0.784946 |   |
| 28            | 1             | 0           | 5.729110                | -0.792690 | -1.943005 |   |
| 29            | 1             | 0           | 6.261476                | 0.171860  | -0.535260 |   |
| 30            | 6             | 0           | -0.113392               | 0.853210  | 0.418259  |   |
| 31            | 8             | 0           | 1.774031                | 1.968089  | -1.222800 |   |
| 32            | 6             | 0           | 2.714316                | 2.745439  | -1.935737 |   |
| 33            | 1             | 0           | 3.532083                | 3.071130  | -1.286842 |   |
| 34            | 1             | 0           | 3.117822                | 2.198452  | -2.793504 |   |
| 35            | 1             | 0           | 2.169129                | 3.616794  | -2.290809 |   |
| 36            | 8             | 0           | 0.641951                | -1.469205 | 1.706832  |   |
| 37            | 6             | 0           | 0.950280                | -2.628982 | 2.454599  |   |
| 38            | 1             | 0           | 1.204824                | -3.468527 | 1.801210  |   |
| 39            | 1             | 0           | 1.773262                | -2.444801 | 3.150945  |   |
| 40            | 1             | 0           | 0.049528                | -2.868682 | 3.014947  |   |
| 41            | 8             | 0           | -2.689427               | 1.726287  | 1.077007  |   |
| 42            | 6             | 0           | -3.944612               | 2.282500  | 1.406651  |   |
| 43            | 1             | 0           | -4.490191               | 2.589520  | 0.509431  |   |
| 44            | 1             | 0           | -4.551162               | 1.579221  | 1.985394  |   |
| 45            | 1             | 0           | -3.726490               | 3.157405  | 2.014383  |   |

1.5.18. **DAAN-triOMe/triOMe** of D<sub>0</sub> state optimized with UCAM-B3LYP/6-311+G(d,p)

| Center Number | Atomic Number | Atomic Type | Coordinates (Angstroms) |           |           | Z |
|---------------|---------------|-------------|-------------------------|-----------|-----------|---|
|               |               |             | X                       | Y         |           |   |
| 1             | 6             | 0           | -3.689476               | 0.259810  | -0.272647 |   |
| 2             | 6             | 0           | -2.447472               | 0.864943  | -0.465111 |   |
| 3             | 6             | 0           | -1.277360               | 0.396695  | 0.156706  |   |
| 4             | 6             | 0           | -1.408726               | -0.752596 | 0.970713  |   |
| 5             | 6             | 0           | -2.631092               | -1.371013 | 1.164893  |   |

|    |   |   |           |           |           |
|----|---|---|-----------|-----------|-----------|
| 6  | 6 | 0 | -3.766899 | -0.857883 | 0.544823  |
| 7  | 1 | 0 | -4.562337 | 0.645294  | -0.772504 |
| 8  | 1 | 0 | -2.746566 | -2.235464 | 1.800031  |
| 9  | 6 | 0 | 1.277404  | 0.396643  | -0.156762 |
| 10 | 6 | 0 | 2.447713  | 0.865136  | 0.464575  |
| 11 | 6 | 0 | 1.408598  | -0.753045 | -0.970289 |
| 12 | 6 | 0 | 3.689648  | 0.259880  | 0.272116  |
| 13 | 6 | 0 | 2.630907  | -1.371577 | -1.164430 |
| 14 | 6 | 0 | 3.766867  | -0.858201 | -0.544846 |
| 15 | 1 | 0 | 4.562627  | 0.645574  | 0.771604  |
| 16 | 1 | 0 | 2.746218  | -2.236321 | -1.799198 |
| 17 | 6 | 0 | 0.000005  | 2.494931  | 0.000208  |
| 18 | 7 | 0 | -0.000634 | 3.650419  | 0.000967  |
| 19 | 8 | 0 | -4.919194 | -1.528084 | 0.799882  |
| 20 | 8 | 0 | 4.919081  | -1.528552 | -0.799841 |
| 21 | 6 | 0 | -6.120590 | -1.057994 | 0.223098  |
| 22 | 1 | 0 | -6.077878 | -1.090589 | -0.869798 |
| 23 | 1 | 0 | -6.902799 | -1.728905 | 0.571204  |
| 24 | 1 | 0 | -6.346908 | -0.038713 | 0.549814  |
| 25 | 6 | 0 | 6.120618  | -1.058244 | -0.223522 |
| 26 | 1 | 0 | 6.902726  | -1.729349 | -0.571482 |
| 27 | 1 | 0 | 6.346908  | -0.039125 | -0.550756 |
| 28 | 1 | 0 | 6.078129  | -1.090336 | 0.869397  |
| 29 | 6 | 0 | 0.000076  | 1.081817  | -0.000014 |
| 30 | 8 | 0 | 2.283330  | 1.912785  | 1.298243  |
| 31 | 8 | 0 | 0.276841  | -1.184231 | -1.570826 |
| 32 | 8 | 0 | -0.277060 | -1.183537 | 1.571617  |
| 33 | 8 | 0 | -2.282855 | 1.912202  | -1.299244 |
| 34 | 6 | 0 | 3.410629  | 2.596499  | 1.803610  |
| 35 | 1 | 0 | 3.979578  | 1.971038  | 2.498773  |
| 36 | 1 | 0 | 4.062844  | 2.937112  | 0.994551  |
| 37 | 1 | 0 | 3.017187  | 3.459558  | 2.335594  |
| 38 | 6 | 0 | 0.340292  | -2.293648 | -2.442883 |
| 39 | 1 | 0 | 1.002251  | -2.095532 | -3.290960 |
| 40 | 1 | 0 | 0.677039  | -3.193806 | -1.920277 |
| 41 | 1 | 0 | -0.674520 | -2.445274 | -2.804006 |
| 42 | 6 | 0 | -0.340681 | -2.292576 | 2.444142  |
| 43 | 1 | 0 | -1.002761 | -2.094074 | 3.292034  |
| 44 | 1 | 0 | -0.677380 | -3.192949 | 1.921874  |
| 45 | 1 | 0 | 0.674070  | -2.444084 | 2.805489  |
| 46 | 6 | 0 | -3.410032 | 2.595858  | -1.804968 |
| 47 | 1 | 0 | -3.978983 | 1.970215  | -2.499965 |
| 48 | 1 | 0 | -4.062288 | 2.936832  | -0.996094 |
| 49 | 1 | 0 | -3.016450 | 3.458685  | -2.337224 |

|    |   |   |           |           |           |
|----|---|---|-----------|-----------|-----------|
| 1  | 6 | 0 | 3.694873  | 0.176900  | 0.299669  |
| 2  | 6 | 0 | 2.446385  | 0.764043  | 0.367152  |
| 3  | 6 | 0 | 1.289935  | 0.084361  | -0.065586 |
| 4  | 6 | 0 | 1.438252  | -1.203752 | -0.595112 |
| 5  | 6 | 0 | 2.692756  | -1.784351 | -0.675961 |
| 6  | 6 | 0 | 3.825999  | -1.119390 | -0.239306 |
| 7  | 1 | 0 | 2.340036  | 1.757670  | 0.778417  |
| 8  | 1 | 0 | 0.580986  | -1.732392 | -0.986393 |
| 9  | 1 | 0 | 2.820427  | -2.775383 | -1.093401 |
| 10 | 6 | 0 | -1.289969 | 0.084379  | 0.065613  |
| 11 | 6 | 0 | -2.446407 | 0.764074  | -0.367133 |
| 12 | 6 | 0 | -1.438303 | -1.203731 | 0.595138  |
| 13 | 6 | 0 | -3.694901 | 0.176941  | -0.299664 |
| 14 | 1 | 0 | -2.340047 | 1.757705  | -0.778387 |
| 15 | 6 | 0 | -2.692814 | -1.784317 | 0.675980  |
| 16 | 1 | 0 | -0.581044 | -1.732381 | 0.986423  |
| 17 | 6 | 0 | -3.826046 | -1.119345 | 0.239314  |
| 18 | 1 | 0 | -2.820497 | -2.775347 | 1.093421  |
| 19 | 6 | 0 | -0.000004 | 2.158805  | 0.000028  |
| 20 | 7 | 0 | 0.000355  | 3.314494  | 0.000086  |
| 21 | 8 | 0 | 5.021370  | -1.766402 | -0.283994 |
| 22 | 8 | 0 | -5.021424 | -1.766343 | 0.283998  |
| 23 | 6 | 0 | 6.035271  | -1.199410 | -1.111708 |
| 24 | 1 | 0 | 6.335297  | -0.215778 | -0.751789 |
| 25 | 1 | 0 | 6.879161  | -1.884607 | -1.063204 |
| 26 | 1 | 0 | 5.683935  | -1.129197 | -2.145585 |
| 27 | 6 | 0 | -6.035325 | -1.199332 | 1.111700  |
| 28 | 1 | 0 | -6.879215 | -1.884530 | 1.063212  |
| 29 | 1 | 0 | -5.683988 | -1.129096 | 2.145575  |
| 30 | 1 | 0 | -6.335351 | -0.215708 | 0.751759  |
| 31 | 6 | 0 | -0.000011 | 0.746508  | 0.000018  |
| 32 | 8 | 0 | -4.836491 | 0.760604  | -0.740237 |
| 33 | 6 | 0 | -4.754224 | 2.045599  | -1.330809 |
| 34 | 1 | 0 | -4.118317 | 2.031235  | -2.220346 |
| 35 | 1 | 0 | -5.770091 | 2.306682  | -1.617910 |
| 36 | 1 | 0 | -4.374003 | 2.786378  | -0.621847 |
| 37 | 8 | 0 | 4.836471  | 0.760547  | 0.740239  |
| 38 | 6 | 0 | 4.754249  | 2.045618  | 1.330651  |
| 39 | 1 | 0 | 5.770136  | 2.306732  | 1.617655  |
| 40 | 1 | 0 | 4.373987  | 2.786307  | 0.621616  |
| 41 | 1 | 0 | 4.118399  | 2.031375  | 2.220230  |

1.6. DAAN radical geometries of D<sub>1</sub> state optimized with UCAM-B3LYP/6-311+G(d,p)

1.6.1. DAAN-H/H of D<sub>1</sub> state optimized with UCAM-B3LYP/6-311+G(d,p)

| Center Number | Atomic Number | Atomic Type | Coordinates (Angstroms) |           |           | Z |
|---------------|---------------|-------------|-------------------------|-----------|-----------|---|
|               |               |             | X                       | Y         |           |   |
| 1             | 6             | 0           | 3.692127                | 0.261201  | 0.351592  |   |
| 2             | 6             | 0           | 2.456456                | 0.845146  | 0.382705  |   |
| 3             | 6             | 0           | 1.278304                | 0.123373  | -0.012119 |   |
| 4             | 6             | 0           | 1.471311                | -1.221665 | -0.479954 |   |
| 5             | 6             | 0           | 2.718007                | -1.789095 | -0.511992 |   |
| 6             | 6             | 0           | 3.851550                | -1.071613 | -0.085286 |   |
| 7             | 1             | 0           | 4.558922                | 0.827810  | 0.669433  |   |
| 8             | 1             | 0           | 2.348627                | 1.868225  | 0.719070  |   |
| 9             | 1             | 0           | 0.625176                | -1.777627 | -0.856476 |   |
| 10            | 1             | 0           | 2.833631                | -2.800651 | -0.882584 |   |
| 11            | 6             | 0           | 0.000000                | 0.764300  | 0.000001  |   |
| 12            | 6             | 0           | -1.278303               | 0.123373  | 0.012120  |   |
| 13            | 6             | 0           | -2.456455               | 0.845145  | -0.382710 |   |
| 14            | 6             | 0           | -1.471312               | -1.221664 | 0.479958  |   |
| 15            | 6             | 0           | -3.692125               | 0.261200  | -0.351598 |   |
| 16            | 1             | 0           | -2.348624               | 1.868223  | -0.719079 |   |
| 17            | 6             | 0           | -2.718008               | -1.789094 | 0.511995  |   |
| 18            | 1             | 0           | -0.625178               | -1.777625 | 0.856485  |   |
| 19            | 6             | 0           | -3.851550               | -1.071613 | 0.085284  |   |
| 20            | 1             | 0           | -4.558920               | 0.827808  | -0.669443 |   |
| 21            | 1             | 0           | -2.833633               | -2.800648 | 0.882590  |   |
| 22            | 6             | 0           | -0.000001               | 2.184458  | 0.000001  |   |
| 23            | 7             | 0           | -0.000001               | 3.338180  | 0.000004  |   |
| 24            | 1             | 0           | 4.830768                | -1.531746 | -0.100062 |   |
| 25            | 1             | 0           | -4.830768               | -1.531745 | 0.100058  |   |

1.6.2. DAAN-H/Me of D<sub>1</sub> state optimized with UCAM-B3LYP/6-311+G(d,p)

| Center Number | Atomic Number | Atomic Type | Coordinates (Angstroms) |           |           | Z |
|---------------|---------------|-------------|-------------------------|-----------|-----------|---|
|               |               |             | X                       | Y         |           |   |
| 1             | 6             | 0           | 4.117355                | -0.061576 | -0.316322 |   |
| 2             | 6             | 0           | 4.120771                | -1.406656 | 0.098288  |   |
| 3             | 6             | 0           | 2.911681                | -1.999467 | 0.490767  |   |
| 4             | 6             | 0           | 1.733506                | -1.295017 | 0.449094  |   |
| 5             | 6             | 0           | 1.699069                | 0.067717  | 0.008542  |   |
| 6             | 6             | 0           | 2.952644                | 0.657764  | -0.355044 |   |
| 7             | 1             | 0           | 5.046354                | 0.411478  | -0.610952 |   |
| 8             | 1             | 0           | 2.906094                | -3.024727 | 0.841480  |   |
| 9             | 1             | 0           | 0.825183                | -1.764121 | 0.798137  |   |
| 10            | 1             | 0           | 2.966725                | 1.692190  | -0.673635 |   |
| 11            | 6             | 0           | 0.501331                | 0.847207  | -0.009534 |   |
| 12            | 6             | 0           | -0.843190               | 0.351211  | -0.009559 |   |
| 13            | 6             | 0           | -1.198523               | -0.955687 | -0.497089 |   |
| 14            | 6             | 0           | -1.929086               | 1.190327  | 0.415195  |   |
| 15            | 6             | 0           | -2.499590               | -1.377483 | -0.514631 |   |

1.5.19. DAAN-OMe/diOMe-m of D<sub>0</sub> state optimized with UCAM-B3LYP/6-311+G(d,p)

| Center Number | Atomic Number | Atomic Type | Coordinates (Angstroms) |           |           | Z |
|---------------|---------------|-------------|-------------------------|-----------|-----------|---|
|               |               |             | X                       | Y         |           |   |
| 1             | 6             | 0           | -4.165068               | 0.576524  | -0.475715 |   |
| 2             | 6             | 0           | -2.874975               | 1.059919  | -0.613028 |   |
| 3             | 6             | 0           | -1.772478               | 0.397426  | -0.054781 |   |
| 4             | 6             | 0           | -2.032167               | -0.772153 | 0.688242  |   |
| 5             | 6             | 0           | -3.310991               | -1.256274 | 0.834874  |   |
| 6             | 6             | 0           | -4.391101               | -0.592972 | 0.246484  |   |
| 7             | 1             | 0           | -4.981224               | 1.117256  | -0.933433 |   |
| 8             | 1             | 0           | -2.715969               | 1.971985  | -1.175537 |   |
| 9             | 1             | 0           | -1.218166               | -1.281484 | 1.185627  |   |
| 10            | 1             | 0           | -3.508830               | -2.145844 | 1.419321  |   |
| 11            | 6             | 0           | 0.799414                | 0.178608  | -0.129165 |   |
| 12            | 6             | 0           | 2.004856                | 0.828207  | 0.204321  |   |
| 13            | 6             | 0           | 0.846099                | -1.188255 | -0.431202 |   |
| 14            | 6             | 0           | 3.202475                | 0.141683  | 0.258429  |   |
| 15            | 1             | 0           | 1.976888                | 1.882378  | 0.440177  |   |
| 16            | 6             | 0           | 2.050186                | -1.871095 | -0.391190 |   |
| 17            | 1             | 0           | -0.048866               | -1.707249 | -0.743434 |   |
| 18            | 6             | 0           | 3.231338                | -1.232994 | -0.052432 |   |
| 19            | 1             | 0           | 2.099484                | -2.925477 | -0.633260 |   |
| 20            | 6             | 0           | -0.321883               | 2.329347  | -0.427149 |   |
| 21            | 7             | 0           | -0.224042               | 3.465930  | -0.611589 |   |
| 22            | 8             | 0           | -5.607488               | -1.151233 | 0.442076  |   |
| 23            | 8             | 0           | 4.371651                | -1.970105 | 0.034014  |   |
| 24            | 6             | 0           | -6.744169               | -0.515454 | -0.112240 |   |
| 25            | 1             | 0           | -6.678471               | -0.465562 | -1.202940 |   |
| 26            | 1             | 0           | -7.596760               | -1.128717 | 0.169448  |   |
| 27            | 1             | 0           | -6.872423               | 0.492052  | 0.293747  |   |
| 28            | 6             | 0           | 5.428507                | -1.634256 | -0.862916 |   |
| 29            | 1             | 0           | 6.216082                | -2.363606 | -0.684484 |   |
| 30            | 1             | 0           | 5.085991                | -1.716309 | -1.898913 |   |
| 31            | 1             | 0           | 5.804120                | -0.629325 | -0.672592 |   |
| 32            | 6             | 0           | -0.434359               | 0.940474  | -0.198585 |   |
| 33            | 8             | 0           | 4.385655                | 0.700298  | 0.614137  |   |
| 34            | 6             | 0           | 4.404113                | 2.069423  | 0.977543  |   |
| 35            | 1             | 0           | 3.765611                | 2.256050  | 1.845464  |   |
| 36            | 1             | 0           | 5.436497                | 2.295259  | 1.233999  |   |
| 37            | 1             | 0           | 4.086991                | 2.706440  | 0.147167  |   |

1.5.20. DAAN-diOMe-m/diOMe-m of D<sub>0</sub> state optimized with UCAM-B3LYP/6-311+G(d,p)

| Center Number | Atomic Number | Atomic Type | Coordinates (Angstroms) |   |  | Z |
|---------------|---------------|-------------|-------------------------|---|--|---|
|               |               |             | X                       | Y |  |   |

|    |   |   |           |           |           |
|----|---|---|-----------|-----------|-----------|
| 16 | 1 | 0 | -0.428038 | -1.596159 | -0.900676 |
| 17 | 6 | 0 | -3.218166 | 0.750562  | 0.393035  |
| 18 | 1 | 0 | -1.704628 | 2.190064  | 0.764051  |
| 19 | 6 | 0 | -3.556856 | -0.557208 | -0.059135 |
| 20 | 1 | 0 | -2.731151 | -2.363884 | -0.901453 |
| 21 | 1 | 0 | -4.010326 | 1.408965  | 0.732527  |
| 22 | 6 | 0 | 0.649169  | 2.258192  | -0.029426 |
| 23 | 7 | 0 | 0.761568  | 3.406825  | -0.044159 |
| 24 | 1 | 0 | 5.043179  | -1.972258 | 0.120929  |
| 25 | 6 | 0 | -4.972189 | -1.031757 | -0.032547 |
| 26 | 1 | 0 | -5.093061 | -1.967325 | -0.579620 |
| 27 | 1 | 0 | -5.311439 | -1.201438 | 0.996086  |
| 28 | 1 | 0 | -5.647426 | -0.289333 | -0.467565 |

#### 1.6.3. DAAN-H/OMe of D<sub>1</sub> state optimized with UCAM-B3LYP/6-311+G(d,p)

| Center Number | Atomic Number | Atomic Type | Coordinates (Angstroms) |           |           |
|---------------|---------------|-------------|-------------------------|-----------|-----------|
|               |               |             | X                       | Y         | Z         |
| 1             | 6             | 0           | -4.523452               | -0.073392 | -0.231896 |
| 2             | 6             | 0           | -3.362691               | 0.654632  | -0.296503 |
| 3             | 6             | 0           | -2.098122               | 0.068893  | 0.015177  |
| 4             | 6             | 0           | -2.111979               | -1.296571 | 0.433274  |
| 5             | 6             | 0           | -3.286568               | -2.011447 | 0.500266  |
| 6             | 6             | 0           | -4.507649               | -1.422042 | 0.159292  |
| 7             | 1             | 0           | -5.463463               | 0.400523  | -0.488537 |
| 8             | 1             | 0           | -3.394304               | 1.694266  | -0.597077 |
| 9             | 1             | 0           | -1.191610               | -1.769540 | 0.744610  |
| 10            | 1             | 0           | -3.261591               | -3.042917 | 0.832023  |
| 11            | 6             | 0           | -0.904459               | 0.854942  | -0.037013 |
| 12            | 6             | 0           | 0.444480                | 0.355763  | -0.041121 |
| 13            | 6             | 0           | 1.530243                | 1.178897  | 0.429651  |
| 14            | 6             | 0           | 0.801059                | -0.923178 | -0.579979 |
| 15            | 6             | 0           | 2.831598                | 0.763061  | 0.382271  |
| 16            | 1             | 0           | 1.297351                | 2.158143  | 0.826540  |
| 17            | 6             | 0           | 2.095276                | -1.340914 | -0.619139 |
| 18            | 1             | 0           | 0.030226                | -1.550556 | -1.003297 |
| 19            | 6             | 0           | 3.144363                | -0.512787 | -0.130885 |
| 20            | 1             | 0           | 3.609777                | 1.417999  | 0.749406  |
| 21            | 1             | 0           | 2.362646                | -2.303322 | -1.037552 |
| 22            | 6             | 0           | -1.040025               | 2.262475  | -0.075427 |
| 23            | 7             | 0           | -1.129138               | 3.414366  | -0.104313 |
| 24            | 8             | 0           | 4.378965                | -1.036790 | -0.205177 |
| 25            | 6             | 0           | 5.484464                | -0.277518 | 0.261675  |
| 26            | 1             | 0           | 6.360997                | -0.899781 | 0.101792  |
| 27            | 1             | 0           | 5.586551                | 0.651384  | -0.304649 |
| 28            | 1             | 0           | 5.382753                | -0.054664 | 1.326551  |
| 29            | 1             | 0           | -5.426313               | -1.992654 | 0.203936  |

#### 1.6.4. DAAN-Me/OMe of D<sub>1</sub> state optimized with UCAM-B3LYP/6-311+G(d,p)

| Center Number | Atomic Number | Atomic Type | Coordinates (Angstroms) |           |           |
|---------------|---------------|-------------|-------------------------|-----------|-----------|
|               |               |             | X                       | Y         | Z         |
| 1             | 6             | 0           | -4.105975               | 0.453117  | -0.291878 |
| 2             | 6             | 0           | -2.886127               | 1.067976  | -0.336474 |
| 3             | 6             | 0           | -1.683206               | 0.369934  | -0.002113 |
| 4             | 6             | 0           | -1.839712               | -0.988582 | 0.419229  |
| 5             | 6             | 0           | -3.076478               | -1.586524 | 0.462693  |
| 6             | 6             | 0           | -4.245798               | -0.900512 | 0.098103  |
| 7             | 1             | 0           | -4.992098               | 1.016048  | -0.565463 |
| 8             | 1             | 0           | -2.817763               | 2.105869  | -0.636932 |
| 9             | 1             | 0           | -0.977384               | -1.545310 | 0.756422  |
| 10            | 1             | 0           | -3.152726               | -2.614790 | 0.799903  |
| 11            | 6             | 0           | -0.421833               | 1.043160  | -0.030064 |
| 12            | 6             | 0           | 0.873817                | 0.427162  | -0.037020 |
| 13            | 6             | 0           | 2.033015                | 1.159481  | 0.396861  |
| 14            | 6             | 0           | 1.110147                | -0.892604 | -0.541296 |
| 15            | 6             | 0           | 3.291750                | 0.624108  | 0.354561  |
| 16            | 1             | 0           | 1.896874                | 2.167357  | 0.766408  |
| 17            | 6             | 0           | 2.362847                | -1.426405 | -0.580821 |
| 18            | 1             | 0           | 0.284238                | -1.461598 | -0.942360 |
| 19            | 6             | 0           | 3.483577                | -0.686857 | -0.124000 |
| 20            | 1             | 0           | 4.128740                | 1.216252  | 0.698216  |
| 21            | 1             | 0           | 2.536637                | -2.419791 | -0.975562 |
| 22            | 6             | 0           | -0.440375               | 2.459196  | -0.039176 |
| 23            | 7             | 0           | -0.441630               | 3.614427  | -0.045099 |
| 24            | 8             | 0           | 4.668644                | -1.320539 | -0.192187 |
| 25            | 6             | 0           | 5.838491                | -0.647010 | 0.245008  |
| 26            | 1             | 0           | 6.657336                | -1.346429 | 0.097593  |
| 27            | 1             | 0           | 6.016231                | 0.253771  | -0.347868 |
| 28            | 1             | 0           | 5.767232                | -0.385694 | 1.303856  |
| 29            | 6             | 0           | -5.588297               | -1.562365 | 0.105532  |
| 30            | 1             | 0           | -5.952697               | -1.728524 | -0.914189 |
| 31            | 1             | 0           | -5.553935               | -2.530720 | 0.606376  |
| 32            | 1             | 0           | -6.333485               | -0.942774 | 0.611919  |

#### 1.6.5. DAAN-OMe/OMe of D<sub>1</sub> state optimized with UCAM-B3LYP/6-311+G(d,p)

| Center Number | Atomic Number | Atomic Type | Coordinates (Angstroms) |          |          |
|---------------|---------------|-------------|-------------------------|----------|----------|
|               |               |             | X                       | Y        | Z        |
| 1             | 6             | 0           | 3.708153                | 0.584529 | 0.303124 |

|    |   |   |           |           |           |
|----|---|---|-----------|-----------|-----------|
| 2  | 6 | 0 | 2.463829  | 1.157034  | 0.353630  |
| 3  | 6 | 0 | 1.278511  | 0.445560  | -0.026581 |
| 4  | 6 | 0 | 1.470547  | -0.892625 | -0.495684 |
| 5  | 6 | 0 | 2.709589  | -1.462748 | -0.545374 |
| 6  | 6 | 0 | 3.855403  | -0.743537 | -0.136426 |
| 7  | 1 | 0 | 4.567237  | 1.165046  | 0.610250  |
| 8  | 1 | 0 | 2.365528  | 2.179915  | 0.693321  |
| 9  | 1 | 0 | 0.623431  | -1.453568 | -0.862963 |
| 10 | 1 | 0 | 2.846220  | -2.472039 | -0.913644 |
| 11 | 6 | 0 | -1.278510 | 0.445559  | 0.026577  |
| 12 | 6 | 0 | -2.463828 | 1.157031  | -0.353637 |
| 13 | 6 | 0 | -1.470546 | -0.892626 | 0.495682  |
| 14 | 6 | 0 | -3.708152 | 0.584526  | -0.303130 |
| 15 | 1 | 0 | -2.365526 | 2.179915  | -0.693330 |
| 16 | 6 | 0 | -2.709587 | -1.462749 | 0.545374  |
| 17 | 1 | 0 | -0.623429 | -1.453568 | 0.862963  |
| 18 | 6 | 0 | -3.855402 | -0.743538 | 0.136424  |
| 19 | 1 | 0 | -4.567236 | 1.165042  | -0.610258 |
| 20 | 1 | 0 | -2.846218 | -2.472040 | 0.913646  |
| 21 | 6 | 0 | -0.000003 | 2.506903  | -0.000001 |
| 22 | 7 | 0 | -0.000006 | 3.662573  | 0.000007  |
| 23 | 8 | 0 | 5.025867  | -1.409903 | -0.208969 |
| 24 | 8 | 0 | -5.025865 | -1.409905 | 0.208970  |
| 25 | 6 | 0 | 6.217726  | -0.748776 | 0.180027  |
| 26 | 1 | 0 | 6.176754  | -0.450018 | 1.230903  |
| 27 | 1 | 0 | 7.018813  | -1.470133 | 0.039368  |
| 28 | 1 | 0 | 6.403166  | 0.128273  | -0.445758 |
| 29 | 6 | 0 | -6.217727 | -0.748776 | -0.180018 |
| 30 | 1 | 0 | -7.018813 | -1.470131 | -0.039350 |
| 31 | 1 | 0 | -6.403159 | 0.128276  | 0.445767  |
| 32 | 1 | 0 | -6.176763 | -0.450020 | -1.230895 |
| 33 | 6 | 0 | -0.000000 | 1.091815  | -0.000001 |

#### 1.6.6. DAAN-SMe/OMe of D<sub>1</sub> state optimized with UCAM-B3LYP/6-311+G(d,p)

| Center Number | Atomic Number | Atomic Type | Coordinates (Angstroms) |           |           |
|---------------|---------------|-------------|-------------------------|-----------|-----------|
|               |               |             | X                       | Y         | Z         |
| 1             | 6             | 0           | 3.329208                | 0.780573  | 0.297121  |
| 2             | 6             | 0           | 2.073815                | 1.310920  | 0.341095  |
| 3             | 6             | 0           | 0.910776                | 0.555036  | -0.033363 |
| 4             | 6             | 0           | 1.148669                | -0.780556 | -0.492008 |
| 5             | 6             | 0           | 2.403666                | -1.309575 | -0.534291 |
| 6             | 6             | 0           | 3.538716                | -0.554306 | -0.128019 |
| 7             | 1             | 0           | 4.165167                | 1.396294  | 0.600658  |
| 8             | 1             | 0           | 1.940478                | 2.333561  | 0.669282  |
| 9             | 1             | 0           | 0.321593                | -1.370892 | -0.858244 |
| 10            | 1             | 0           | 2.545070                | -2.320370 | -0.900830 |
| 11            | 6             | 0           | -1.647733               | 0.468951  | 0.023793  |
| 12            | 6             | 0           | -2.847755               | 1.134068  | -0.353272 |
| 13            | 6             | 0           | -1.793127               | -0.866922 | 0.496450  |
| 14            | 6             | 0           | -4.077081               | 0.519583  | -0.297795 |
| 15            | 1             | 0           | -2.787279               | 2.158263  | -0.698850 |
| 16            | 6             | 0           | -3.015929               | -1.480519 | 0.554094  |
| 17            | 1             | 0           | -0.928022               | -1.400581 | 0.863127  |
| 18            | 6             | 0           | -4.179262               | -0.804847 | 0.148182  |
| 19            | 1             | 0           | -4.954317               | 1.071226  | -0.606405 |
| 20            | 1             | 0           | -3.115649               | -2.492249 | 0.927419  |
| 21            | 6             | 0           | -0.428076               | 2.571673  | -0.034322 |
| 22            | 7             | 0           | -0.453891               | 3.727309  | -0.051980 |
| 23            | 8             | 0           | -5.331643               | -1.505754 | 0.229938  |
| 24            | 6             | 0           | 6.261337                | -0.114862 | 0.346389  |
| 25            | 1             | 0           | 6.064877                | 0.200940  | 1.369934  |
| 26            | 1             | 0           | 7.236606                | -0.597092 | 0.305265  |
| 27            | 1             | 0           | 6.260835                | 0.743323  | -0.324163 |
| 28            | 6             | 0           | -6.541212               | -0.878559 | -0.156179 |
| 29            | 1             | 0           | -7.322783               | -1.619958 | -0.008804 |
| 30            | 1             | 0           | -6.748447               | -0.003401 | 0.465915  |
| 31            | 1             | 0           | -6.514459               | -0.582981 | -1.208725 |
| 32            | 6             | 0           | -0.388563               | 1.158554  | -0.011444 |
| 33            | 16            | 0           | 5.073876                | -1.363530 | -0.191863 |

#### 1.6.7. DAAN-F/F of D<sub>1</sub> state optimized with UCAM-B3LYP/6-311+G(d,p)

| Center Number | Atomic Number | Atomic Type | Coordinates (Angstroms) |           |           |
|---------------|---------------|-------------|-------------------------|-----------|-----------|
|               |               |             | X                       | Y         | Z         |
| 1             | 6             | 0           | 3.690650                | 0.490706  | 0.385900  |
| 2             | 6             | 0           | 2.451944                | 1.067169  | 0.406820  |
| 3             | 6             | 0           | 1.277926                | 0.346162  | -0.001446 |
| 4             | 6             | 0           | 1.472249                | -0.997431 | -0.472897 |
| 5             | 6             | 0           | 2.715345                | -1.573105 | -0.497918 |
| 6             | 6             | 0           | 3.816778                | -0.834241 | -0.056748 |
| 7             | 1             | 0           | 4.572484                | 1.030250  | 0.706243  |
| 8             | 1             | 0           | 2.342850                | 2.089049  | 0.745525  |
| 9             | 1             | 0           | 0.630741                | -1.551577 | -0.861522 |
| 10            | 1             | 0           | 2.864952                | -2.580192 | -0.865553 |
| 11            | 6             | 0           | -1.278008               | 0.346233  | 0.001395  |
| 12            | 6             | 0           | -2.451995               | 1.067272  | -0.406913 |
| 13            | 6             | 0           | -1.472391               | -0.997327 | 0.472919  |
| 14            | 6             | 0           | -3.690725               | 0.490864  | -0.385962 |
| 15            | 1             | 0           | -2.342855               | 2.089128  | -0.745671 |
| 16            | 6             | 0           | -2.715511               | -1.572943 | 0.497972  |
| 17            | 1             | 0           | -0.630907               | -1.551490 | 0.861573  |
| 18            | 6             | 0           | -3.816912               | -0.834054 | 0.056762  |

|    |   |   |           |           |           |
|----|---|---|-----------|-----------|-----------|
| 19 | 1 | 0 | -4.572535 | 1.030429  | -0.706334 |
| 20 | 1 | 0 | -2.865164 | -2.580003 | 0.865663  |
| 21 | 6 | 0 | 0.000006  | 2.407584  | -0.000086 |
| 22 | 7 | 0 | 0.000838  | 3.561458  | 0.000162  |
| 23 | 6 | 0 | -0.000023 | 0.988583  | -0.000045 |
| 24 | 9 | 0 | 5.029319  | -1.404490 | -0.063682 |
| 25 | 9 | 0 | -5.029478 | -1.404248 | 0.063729  |

1.6.8. **DAAN-F/OMe** of D<sub>1</sub> state optimized with UCAM-B3LYP/6-311+G(d,p)

| Center Number | Atomic Number | Atomic Type | Coordinates (Angstroms) |           |           | Z |
|---------------|---------------|-------------|-------------------------|-----------|-----------|---|
|               |               |             | X                       | Y         |           |   |
| 1             | 6             | 0           | 4.144952                | 0.402312  | -0.281196 |   |
| 2             | 6             | 0           | 2.925189                | 1.027751  | -0.329455 |   |
| 3             | 6             | 0           | 1.715254                | 0.341418  | -0.006511 |   |
| 4             | 6             | 0           | 1.841059                | -1.019460 | 0.405083  |   |
| 5             | 6             | 0           | 3.065664                | -1.646558 | 0.458118  |   |
| 6             | 6             | 0           | 4.205186                | -0.936330 | 0.104989  |   |
| 7             | 1             | 0           | 5.057424                | 0.924481  | -0.538874 |   |
| 8             | 1             | 0           | 2.872014                | 2.067510  | -0.625420 |   |
| 9             | 1             | 0           | 0.965583                | -1.565645 | 0.724638  |   |
| 10            | 1             | 0           | 3.157725                | -2.675829 | 0.780722  |   |
| 11            | 6             | 0           | -0.842399               | 0.426726  | -0.043107 |   |
| 12            | 6             | 0           | -1.988475               | 1.156984  | 0.438278  |   |
| 13            | 6             | 0           | -1.097863               | -0.872986 | -0.589808 |   |
| 14            | 6             | 0           | -3.252263               | 0.638472  | 0.393106  |   |
| 15            | 1             | 0           | -1.833115               | 2.148895  | 0.841638  |   |
| 16            | 6             | 0           | -2.354734               | -1.392719 | -0.627240 |   |
| 17            | 1             | 0           | -0.282316               | -1.433909 | -1.022785 |   |
| 18            | 6             | 0           | -3.464495               | -0.655014 | -0.128310 |   |
| 19            | 1             | 0           | -4.078693               | 1.226246  | 0.768377  |   |
| 20            | 1             | 0           | -2.546085               | -2.370249 | -1.052215 |   |
| 21            | 6             | 0           | 0.488966                | 2.445394  | -0.059142 |   |
| 22            | 7             | 0           | 0.495492                | 3.601044  | -0.073972 |   |
| 23            | 8             | 0           | -4.653349               | -1.275588 | -0.201893 |   |
| 24            | 6             | 0           | -5.814648               | -0.610520 | 0.273571  |   |
| 25            | 1             | 0           | -6.639036               | -1.299799 | 0.111390  |   |
| 26            | 1             | 0           | -5.727584               | -0.387992 | 1.339796  |   |
| 27            | 1             | 0           | -5.992455               | 0.311201  | -0.285682 |   |
| 28            | 6             | 0           | 0.461701                | 1.031823  | -0.039243 |   |
| 29            | 9             | 0           | 5.400703                | -1.552363 | 0.141840  |   |

1.6.9. **DAAN-Br/OMe** of D<sub>1</sub> state optimized with UCAM-B3LYP/6-311+G(d,p)

| Center Number | Atomic Number | Atomic Type | Coordinates (Angstroms) |           |           | Z |
|---------------|---------------|-------------|-------------------------|-----------|-----------|---|
|               |               |             | X                       | Y         |           |   |
| 1             | 6             | 0           | -2.970509               | 1.139250  | -0.311014 |   |
| 2             | 6             | 0           | -1.682026               | 1.597113  | -0.338800 |   |
| 3             | 6             | 0           | -0.571248               | 0.749476  | -0.026157 |   |
| 4             | 6             | 0           | -0.885666               | -0.592283 | 0.360960  |   |
| 5             | 6             | 0           | -2.179314               | -1.048712 | 0.395369  |   |
| 6             | 6             | 0           | -3.234052               | -0.195485 | 0.046698  |   |
| 7             | 1             | 0           | -3.788760               | 1.799439  | -0.566965 |   |
| 8             | 1             | 0           | -1.490727               | 2.626734  | -0.612562 |   |
| 9             | 1             | 0           | -0.095738               | -1.256560 | 0.679559  |   |
| 10            | 1             | 0           | -2.388670               | -2.064737 | 0.703858  |   |
| 11            | 6             | 0           | 1.973329                | 0.497384  | -0.045950 |   |
| 12            | 6             | 0           | 3.200114                | 1.072926  | 0.429977  |   |
| 13            | 6             | 0           | 2.059146                | -0.824994 | -0.585646 |   |
| 14            | 6             | 0           | 4.387178                | 0.393003  | 0.392795  |   |
| 15            | 1             | 0           | 3.176520                | 2.079035  | 0.827715  |   |
| 16            | 6             | 0           | 3.239319                | -1.504900 | -0.618599 |   |
| 17            | 1             | 0           | 1.179793                | -1.278251 | -1.019539 |   |
| 18            | 6             | 0           | 4.430386                | -0.917693 | -0.121187 |   |
| 19            | 1             | 0           | 5.281668                | 0.870581  | 0.768161  |   |
| 20            | 1             | 0           | 3.301664                | -2.500627 | -1.039755 |   |
| 21            | 6             | 0           | 0.914201                | 2.673644  | -0.041331 |   |
| 22            | 7             | 0           | 1.054827                | 3.820153  | -0.039370 |   |
| 23            | 8             | 0           | 5.530382                | -1.685346 | -0.188220 |   |
| 24            | 6             | 0           | 6.765922                | -1.171522 | 0.287441  |   |
| 25            | 1             | 0           | 7.495624                | -1.961642 | 0.131580  |   |
| 26            | 1             | 0           | 7.062059                | -0.283395 | -0.276072 |   |
| 27            | 1             | 0           | 6.705712                | -0.933620 | 1.352241  |   |
| 28            | 6             | 0           | 0.759056                | 1.266297  | -0.042712 |   |
| 29            | 35            | 0           | -5.008600               | -0.833037 | 0.061202  |   |

1.6.10. **DAAN-Ac/OMe** of D<sub>1</sub> state optimized with UCAM-B3LYP/6-311+G(d,p)

| Center Number | Atomic Number | Atomic Type | Coordinates (Angstroms) |           |           | Z |
|---------------|---------------|-------------|-------------------------|-----------|-----------|---|
|               |               |             | X                       | Y         |           |   |
| 1             | 6             | 0           | -3.399710               | 0.917497  | 0.317610  |   |
| 2             | 6             | 0           | -2.139324               | 1.431543  | 0.327373  |   |
| 3             | 6             | 0           | -0.995264               | 0.633778  | -0.029381 |   |
| 4             | 6             | 0           | -1.257432               | -0.710966 | -0.454908 |   |
| 5             | 6             | 0           | -2.520141               | -1.216651 | -0.470950 |   |
| 6             | 6             | 0           | -3.642808               | -0.432887 | -0.064463 |   |
| 7             | 1             | 0           | -4.226763               | 1.550621  | 0.611838  |   |
| 8             | 1             | 0           | -1.979968               | 2.460353  | 0.624225  |   |
| 9             | 1             | 0           | -0.441510               | -1.319638 | -0.817631 |   |
| 10            | 1             | 0           | -2.711615               | -2.226973 | -0.808049 |   |

|    |   |   |           |           |           |
|----|---|---|-----------|-----------|-----------|
| 11 | 6 | 0 | 1.554466  | 0.488523  | 0.025831  |
| 12 | 6 | 0 | 2.765596  | 1.114974  | -0.392329 |
| 13 | 6 | 0 | 1.667285  | -0.834507 | 0.546795  |
| 14 | 6 | 0 | 3.976095  | 0.471824  | -0.337088 |
| 15 | 1 | 0 | 2.722790  | 2.127437  | -0.772767 |
| 16 | 6 | 0 | 2.870966  | -1.475777 | 0.606332  |
| 17 | 1 | 0 | 0.791400  | -1.325985 | 0.944585  |
| 18 | 6 | 0 | 4.047816  | -0.842124 | 0.154410  |
| 19 | 1 | 0 | 4.863609  | 0.985967  | -0.678366 |
| 20 | 1 | 0 | 2.954409  | -2.474853 | 1.015174  |
| 21 | 6 | 0 | 0.400888  | 2.620170  | -0.051520 |
| 22 | 7 | 0 | 0.481720  | 3.770962  | -0.079111 |
| 23 | 8 | 0 | 5.173776  | -1.567779 | 0.242759  |
| 24 | 6 | 0 | 6.402659  | -0.998628 | -0.184782 |
| 25 | 1 | 0 | 7.156525  | -1.763949 | -0.020504 |
| 26 | 1 | 0 | 6.366752  | -0.742929 | -1.246591 |
| 27 | 1 | 0 | 6.648348  | -0.111256 | 0.403680  |
| 28 | 6 | 0 | 0.312184  | 1.203872  | -0.016893 |
| 29 | 6 | 0 | -4.972052 | -1.040702 | -0.076427 |
| 30 | 8 | 0 | -5.113006 | -2.211588 | -0.413362 |
| 31 | 6 | 0 | -6.169526 | -0.212747 | 0.329172  |
| 32 | 1 | 0 | -6.067050 | 0.153039  | 1.353812  |
| 33 | 1 | 0 | -6.285743 | 0.657248  | -0.321794 |
| 34 | 1 | 0 | -7.059575 | -0.834032 | 0.258306  |

1.6.11. **DAAN-COOMe/OMe** of D<sub>1</sub> state optimized with UCAM-B3LYP/6-311+G(d,p)

| Center Number | Atomic Number | Atomic Type | Coordinates (Angstroms) |           |           | Z |
|---------------|---------------|-------------|-------------------------|-----------|-----------|---|
|               |               |             | X                       | Y         |           |   |
| 1             | 6             | 0           | 2.994718                | 1.039475  | -0.248380 |   |
| 2             | 6             | 0           | 1.721004                | 1.524528  | -0.275731 |   |
| 3             | 6             | 0           | 0.588947                | 0.690053  | 0.017782  |   |
| 4             | 6             | 0           | 0.873618                | -0.665191 | 0.396762  |   |
| 5             | 6             | 0           | 2.153094                | -1.140037 | 0.431842  |   |
| 6             | 6             | 0           | 3.248691                | -0.312899 | 0.093452  |   |
| 7             | 1             | 0           | 3.827802                | 1.684456  | -0.492138 |   |
| 8             | 1             | 0           | 1.546527                | 2.560018  | -0.538355 |   |
| 9             | 1             | 0           | 0.066149                | -1.312383 | 0.706518  |   |
| 10            | 1             | 0           | 2.356755                | -2.159948 | 0.732193  |   |
| 11            | 6             | 0           | -1.956640               | 0.482307  | -0.038341 |   |
| 12            | 6             | 0           | -3.175659               | 1.074998  | 0.425385  |   |
| 13            | 6             | 0           | -2.056352               | -0.831711 | -0.591008 |   |
| 14            | 6             | 0           | -4.373835               | 0.414227  | 0.372246  |   |
| 15            | 1             | 0           | -3.140508               | 2.077572  | 0.831293  |   |
| 16            | 6             | 0           | -3.247247               | -1.492410 | -0.642913 |   |
| 17            | 1             | 0           | -1.178868               | -1.295063 | -1.017705 |   |
| 18            | 6             | 0           | -4.431681               | -0.890321 | -0.152776 |   |
| 19            | 1             | 0           | -5.264360               | 0.902825  | 0.742389  |   |
| 20            | 1             | 0           | -3.321307               | -2.483028 | -1.073801 |   |
| 21            | 6             | 0           | -0.861824               | 2.640193  | -0.000741 |   |
| 22            | 7             | 0           | -0.990234               | 3.787323  | 0.009067  |   |
| 23            | 8             | 0           | -5.542553               | -1.636942 | -0.238224 |   |
| 24            | 6             | 0           | -6.775731               | -1.107515 | 0.228624  |   |
| 25            | 1             | 0           | -7.515307               | -1.885129 | 0.057829  |   |
| 26            | 1             | 0           | -6.723116               | -0.880034 | 1.295957  |   |
| 27            | 1             | 0           | -7.051473               | -0.210455 | -0.330808 |   |
| 28            | 6             | 0           | -0.727865               | 1.228230  | -0.010997 |   |
| 29            | 6             | 0           | 4.597557                | -0.887406 | 0.127697  |   |
| 30            | 8             | 0           | 4.846424                | -2.036743 | 0.414838  |   |
| 31            | 8             | 0           | 5.553478                | 0.003816  | -0.196457 |   |
| 32            | 6             | 0           | 6.893549                | -0.490748 | -0.179793 |   |
| 33            | 1             | 0           | 7.520594                | 0.350958  | -0.462366 |   |
| 34            | 1             | 0           | 7.156552                | -0.847335 | 0.816171  |   |
| 35            | 1             | 0           | 7.007340                | -1.309398 | -0.890552 |   |

1.6.12. **DAAN-CN/OMe** of D<sub>1</sub> state optimized with UCAM-B3LYP/6-311+G(d,p)

| Center Number | Atomic Number | Atomic Type | Coordinates (Angstroms) |           |           | Z |
|---------------|---------------|-------------|-------------------------|-----------|-----------|---|
|               |               |             | X                       | Y         |           |   |
| 1             | 6             | 0           | 3.870540                | 0.718104  | -0.275403 |   |
| 2             | 6             | 0           | 2.627882                | 1.272599  | -0.308331 |   |
| 3             | 6             | 0           | 1.449607                | 0.507890  | -0.009244 |   |
| 4             | 6             | 0           | 1.655463                | -0.857995 | 0.382027  |   |
| 5             | 6             | 0           | 2.902477                | -1.410309 | 0.425191  |   |
| 6             | 6             | 0           | 4.046590                | -0.647822 | 0.080078  |   |
| 7             | 1             | 0           | 4.739460                | 1.313930  | -0.523917 |   |
| 8             | 1             | 0           | 2.515355                | 2.314380  | -0.579235 |   |
| 9             | 1             | 0           | 0.812142                | -1.455439 | 0.695560  |   |
| 10            | 1             | 0           | 3.030438                | -2.438923 | 0.737922  |   |
| 11            | 6             | 0           | -1.104002               | 0.446279  | -0.048745 |   |
| 12            | 6             | 0           | -2.278416               | 1.111646  | 0.426226  |   |
| 13            | 6             | 0           | -1.286258               | -0.861987 | -0.590335 |   |
| 14            | 6             | 0           | -3.514280               | 0.522437  | 0.392217  |   |
| 15            | 1             | 0           | -2.179204               | 2.112833  | 0.825058  |   |
| 16            | 6             | 0           | -2.514420               | -1.452857 | -0.623070 |   |
| 17            | 1             | 0           | -0.443377               | -1.378032 | -1.026577 |   |
| 18            | 6             | 0           | -3.654795               | -0.779292 | -0.123206 |   |
| 19            | 1             | 0           | -4.369900               | 1.064563  | 0.769942  |   |
| 20            | 1             | 0           | -2.652049               | -2.439893 | -1.046452 |   |
| 21            | 6             | 0           | 0.115869                | 2.538004  | -0.054775 |   |
| 22            | 7             | 0           | 0.057497                | 3.690749  | -0.064614 |   |
| 23            | 8             | 0           | -4.807281               | -1.458836 | -0.190730 |   |

|    |   |   |           |           |           |
|----|---|---|-----------|-----------|-----------|
| 24 | 6 | 0 | -6.003680 | -0.855581 | 0.284820  |
| 25 | 1 | 0 | -6.788278 | -1.590267 | 0.125981  |
| 26 | 1 | 0 | -5.926732 | -0.625664 | 1.350015  |
| 27 | 1 | 0 | -6.231929 | 0.052321  | -0.278223 |
| 28 | 6 | 0 | 0.167050  | 1.121079  | -0.042296 |
| 29 | 6 | 0 | 5.331563  | -1.229306 | 0.101157  |
| 30 | 7 | 0 | 6.383244  | -1.707384 | 0.118599  |

1.6.13. **DAAN-NO<sub>2</sub>/OMe** of D<sub>1</sub> state optimized with UCAM-B3LYP/6-311+G(d,p)

| Center Number | Atomic Number | Atomic Type | Coordinates (Angstroms) |           |           | Z |
|---------------|---------------|-------------|-------------------------|-----------|-----------|---|
|               |               |             | X                       | Y         |           |   |
| 1             | 6             | 0           | 3.382615                | 0.842622  | -0.507952 |   |
| 2             | 6             | 0           | 2.104099                | 1.379203  | -0.507621 |   |
| 3             | 6             | 0           | 1.047348                | 0.740526  | 0.145773  |   |
| 4             | 6             | 0           | 1.329886                | -0.434961 | 0.849218  |   |
| 5             | 6             | 0           | 2.604402                | -0.977292 | 0.860998  |   |
| 6             | 6             | 0           | 3.618018                | -0.340813 | 0.166603  |   |
| 7             | 1             | 0           | 4.182535                | 1.340819  | -1.036191 |   |
| 8             | 1             | 0           | 1.921951                | 2.304974  | -1.039511 |   |
| 9             | 1             | 0           | 0.547146                | -0.924486 | 1.413392  |   |
| 10            | 1             | 0           | 2.804280                | -1.891715 | 1.401531  |   |
| 11            | 6             | 0           | -1.522759               | 0.542257  | 0.031041  |   |
| 12            | 6             | 0           | -2.769089               | 1.139705  | 0.290285  |   |
| 13            | 6             | 0           | -1.530387               | -0.817586 | -0.353399 |   |
| 14            | 6             | 0           | -3.952741               | 0.430108  | 0.200138  |   |
| 15            | 1             | 0           | -2.806162               | 2.184711  | 0.572923  |   |
| 16            | 6             | 0           | -2.702529               | -1.527570 | -0.446956 |   |
| 17            | 1             | 0           | -0.602018               | 1.306638  | -0.613835 |   |
| 18            | 6             | 0           | -3.927808               | -0.915250 | -0.164564 |   |
| 19            | 1             | 0           | -4.885121               | 0.932765  | 0.414738  |   |
| 20            | 1             | 0           | -2.704790               | -2.565452 | -0.754883 |   |
| 21            | 6             | 0           | -0.402636               | 2.717524  | 0.109262  |   |
| 22            | 7             | 0           | -0.477218               | 3.870969  | 0.106518  |   |
| 23            | 8             | 0           | -5.021519               | -1.699739 | -0.281712 |   |
| 24            | 6             | 0           | -6.296594               | -1.133186 | -0.039443 |   |
| 25            | 1             | 0           | -7.013854               | -1.935364 | -0.195057 |   |
| 26            | 1             | 0           | -6.379332               | -0.767352 | 0.987844  |   |
| 27            | 1             | 0           | -6.506384               | -0.318256 | -0.737940 |   |
| 28            | 6             | 0           | -0.306452               | 1.311491  | 0.107122  |   |
| 29            | 7             | 0           | 4.957571                | -0.932563 | 0.165423  |   |
| 30            | 8             | 0           | 5.792723                | -0.458237 | -0.749778 |   |
| 31            | 8             | 0           | 4.982176                | -2.262462 | 0.186537  |   |

1.6.14. **DAAN-OMe/diOMe** of D<sub>1</sub> state optimized with UCAM-B3LYP/6-311+G(d,p)

| Center Number | Atomic Number | Atomic Type | Coordinates (Angstroms) |           |           | Z |
|---------------|---------------|-------------|-------------------------|-----------|-----------|---|
|               |               |             | X                       | Y         |           |   |
| 1             | 6             | 0           | -3.997038               | 0.519866  | -0.337000 |   |
| 2             | 6             | 0           | -2.729459               | 1.014367  | -0.546010 |   |
| 3             | 6             | 0           | -1.562602               | 0.302891  | -0.150985 |   |
| 4             | 6             | 0           | -1.782317               | -0.943066 | 0.503416  |   |
| 5             | 6             | 0           | -3.043651               | -1.435809 | 0.713220  |   |
| 6             | 6             | 0           | -4.174789               | -0.719320 | 0.290553  |   |
| 7             | 1             | 0           | -4.846440               | 1.101490  | -0.668252 |   |
| 8             | 1             | 0           | -2.612655               | 1.975694  | -1.029659 |   |
| 9             | 1             | 0           | -0.938071               | -1.507996 | 0.874123  |   |
| 10            | 1             | 0           | -3.195335               | -2.382455 | 1.217261  |   |
| 11            | 6             | 0           | 0.965099                | 0.100202  | -0.268745 |   |
| 12            | 6             | 0           | 2.205026                | 0.677236  | -0.232262 |   |
| 13            | 6             | 0           | 1.056983                | -1.241997 | -0.717798 |   |
| 14            | 6             | 0           | 3.404961                | -0.017206 | 0.221407  |   |
| 15            | 6             | 0           | 2.232942                | -1.936858 | -0.704831 |   |
| 16            | 1             | 0           | 0.170719                | -1.709594 | -1.123268 |   |
| 17            | 6             | 0           | 3.430477                | -1.329459 | -0.243585 |   |
| 18            | 1             | 0           | 4.300457                | 0.452216  | 0.596896  |   |
| 19            | 1             | 0           | 2.287386                | -2.956079 | -1.066071 |   |
| 20            | 6             | 0           | -0.174911               | 2.221971  | -0.716897 |   |
| 21            | 7             | 0           | -0.149970               | 3.327941  | -1.054174 |   |
| 22            | 8             | 0           | -5.374469               | -1.301229 | 0.533297  |   |
| 23            | 8             | 0           | 4.528348                | -2.112252 | -0.294074 |   |
| 24            | 6             | 0           | -6.549740               | -0.623690 | 0.132941  |   |
| 25            | 1             | 0           | -6.569608               | -0.470255 | -0.950018 |   |
| 26            | 1             | 0           | -7.379303               | -1.265020 | 0.421585  |   |
| 27            | 1             | 0           | -6.643557               | 0.341005  | 0.640090  |   |
| 28            | 6             | 0           | 5.764671                | -1.583905 | 0.149800  |   |
| 29            | 1             | 0           | 6.496967                | -2.374869 | 0.008844  |   |
| 30            | 1             | 0           | 6.053349                | -0.710354 | -0.441567 |   |
| 31            | 1             | 0           | 5.719474                | -1.314558 | 1.208856  |   |
| 32            | 6             | 0           | -0.253054               | 0.862074  | -0.348615 |   |
| 33            | 8             | 0           | 2.070567                | 1.915847  | 0.713244  |   |
| 34            | 6             | 0           | 3.203510                | 2.634023  | 1.162994  |   |
| 35            | 1             | 0           | 3.666379                | 2.139164  | 2.021965  |   |
| 36            | 1             | 0           | 3.934802                | 2.747054  | 0.358316  |   |
| 37            | 1             | 0           | 2.833009                | 3.612112  | 1.457622  |   |

1.6.15. **DAAN-OMe/triOMe** of D<sub>1</sub> state optimized with UCAM-B3LYP/6-311+G(d,p)

| Center | Atomic | Atomic | Coordinates (Angstroms) |  |  |
|--------|--------|--------|-------------------------|--|--|
|--------|--------|--------|-------------------------|--|--|

| Number | Number | Type | X         | Y         | Z         |
|--------|--------|------|-----------|-----------|-----------|
| 1      | 6      | 0    | -3.997998 | 0.672845  | 0.203825  |
| 2      | 6      | 0    | -2.761482 | 1.112548  | 0.616366  |
| 3      | 6      | 0    | -1.558135 | 0.475164  | 0.209573  |
| 4      | 6      | 0    | -1.703280 | -0.624150 | -0.685439 |
| 5      | 6      | 0    | -2.935055 | -1.057832 | -1.103122 |
| 6      | 6      | 0    | -4.105402 | -0.425346 | -0.661611 |
| 7      | 1      | 0    | -4.880584 | 1.187968  | 0.558126  |
| 8      | 1      | 0    | -2.698134 | 1.967518  | 1.277398  |
| 9      | 1      | 0    | -0.821758 | -1.123855 | -1.063184 |
| 10     | 1      | 0    | -3.029928 | -1.895555 | -1.783345 |
| 11     | 6      | 0    | 0.966886  | 0.307007  | 0.342339  |
| 12     | 6      | 0    | 2.098358  | 0.996860  | -0.231974 |
| 13     | 6      | 0    | 1.177744  | -1.084309 | 0.649001  |
| 14     | 6      | 0    | 3.301098  | 0.364211  | -0.488417 |
| 15     | 6      | 0    | 2.353538  | -1.726550 | 0.349375  |
| 16     | 6      | 0    | 3.420535  | -1.001413 | -0.213951 |
| 17     | 1      | 0    | 4.120975  | 0.911833  | -0.923646 |
| 18     | 1      | 0    | 2.518347  | -2.769402 | 0.574797  |
| 19     | 6      | 0    | -0.219990 | 2.222624  | 1.275245  |
| 20     | 7      | 0    | -0.196087 | 3.235480  | 1.835268  |
| 21     | 8      | 0    | -5.275496 | -0.939856 | -1.119262 |
| 22     | 8      | 0    | 4.536956  | -1.720990 | -0.441381 |
| 23     | 6      | 0    | -6.486370 | -0.336001 | -0.710283 |
| 24     | 1      | 0    | -6.539363 | 0.707644  | -1.034299 |
| 25     | 1      | 0    | -7.281931 | -0.902443 | -1.189228 |
| 26     | 1      | 0    | -6.609027 | -0.386583 | 0.375798  |
| 27     | 6      | 0    | 5.676380  | -1.079414 | -0.988162 |
| 28     | 1      | 0    | 6.440656  | -1.848381 | -1.067753 |
| 29     | 1      | 0    | 5.462592  | -0.676111 | -1.981517 |
| 30     | 1      | 0    | 6.031137  | -0.280616 | -0.331521 |
| 31     | 6      | 0    | -0.276903 | 0.975211  | 0.627815  |
| 32     | 8      | 0    | 1.862692  | 2.283081  | -0.509324 |
| 33     | 6      | 0    | 2.902137  | 3.095467  | -1.017940 |
| 34     | 1      | 0    | 3.744596  | 3.131009  | -0.321704 |
| 35     | 1      | 0    | 3.240981  | 2.736840  | -1.994791 |
| 36     | 1      | 0    | 2.474613  | 4.089208  | -1.120668 |
| 37     | 8      | 0    | 0.138409  | -1.669107 | 1.265566  |
| 38     | 6      | 0    | 0.219754  | -3.043955 | 1.589579  |
| 39     | 1      | 0    | 0.351432  | -3.653116 | 0.690629  |
| 40     | 1      | 0    | 1.042141  | -3.233786 | 2.285413  |
| 41     | 1      | 0    | -0.725510 | -3.293360 | 2.064518  |

1.6.16. **DAAN-diOMe/diOMe** of D<sub>1</sub> state optimized with UCAM-B3LYP/6-311+G(d,p)

| Center Number | Atomic Number | Atomic Type | Coordinates (Angstroms) |           |           | Z |
|---------------|---------------|-------------|-------------------------|-----------|-----------|---|
|               |               |             | X                       | Y         |           |   |
| 1             | 6             | 0           | -3.710580               | -0.071956 | -0.165191 |   |
| 2             | 6             | 0           | -2.503373               | 0.578178  | -0.375105 |   |
| 3             | 6             | 0           | -1.249636               | 0.053205  | 0.117612  |   |
| 4             | 6             | 0           | -1.335462               | -1.200409 | 0.777678  |   |
| 5             | 6             | 0           | -2.520893               | -1.855478 | 0.968570  |   |
| 6             | 6             | 0           | -3.730482               | -1.291471 | 0.509325  |   |
| 7             | 1             | 0           | -4.622114               | 0.358568  | -0.548405 |   |
| 8             | 1             | 0           | -0.427301               | -1.631897 | 1.176395  |   |
| 9             | 1             | 0           | -2.561597               | -2.803490 | 1.489720  |   |
| 10            | 6             | 0           | 1.249644                | 0.053207  | -0.117621 |   |
| 11            | 6             | 0           | 2.503376                | 0.578182  | 0.375112  |   |
| 12            | 6             | 0           | 1.335480                | -1.200406 | -0.777686 |   |
| 13            | 6             | 0           | 3.710588                | -0.071940 | 0.165198  |   |
| 14            | 6             | 0           | 2.520917                | -1.855466 | -0.968575 |   |
| 15            | 1             | 0           | 0.427324                | -1.631901 | -1.176408 |   |
| 16            | 6             | 0           | 3.730501                | -1.291451 | -0.509327 |   |
| 17            | 1             | 0           | 4.622118                | 0.358586  | 0.548420  |   |
| 18            | 1             | 0           | 2.561629                | -2.803477 | -1.489727 |   |
| 19            | 6             | 0           | 0.000003                | 2.173367  | -0.000043 |   |
| 20            | 7             | 0           | -0.000104               | 3.328817  | -0.000014 |   |
| 21            | 8             | 0           | -4.847089               | -2.014024 | 0.762251  |   |
| 22            | 8             | 0           | 4.847114                | -2.013995 | -0.762255 |   |
| 23            | 6             | 0           | -6.095340               | -1.511088 | 0.328773  |   |
| 24            | 1             | 0           | -6.125873               | -1.412720 | -0.760505 |   |
| 25            | 1             | 0           | -6.839196               | -2.238384 | 0.645342  |   |
| 26            | 1             | 0           | -6.313987               | -0.543801 | 0.790799  |   |
| 27            | 6             | 0           | 6.095361                | -1.511050 | -0.328776 |   |
| 28            | 1             | 0           | 6.839223                | -2.238337 | -0.645350 |   |
| 29            | 1             | 0           | 6.313998                | -0.543758 | -0.790795 |   |
| 30            | 1             | 0           | 6.125895                | -1.412689 | 0.760503  |   |
| 31            | 6             | 0           | 0.000003                | 0.758339  | -0.000011 |   |
| 32            | 8             | 0           | -2.394883               | 1.715311  | -1.076127 |   |
| 33            | 8             | 0           | 2.394874                | 1.715303  | 1.076152  |   |
| 34            | 6             | 0           | -3.551499               | 2.383124  | -1.534542 |   |
| 35            | 1             | 0           | -4.097886               | 1.774913  | -2.262377 |   |
| 36            | 1             | 0           | -4.209589               | 2.642628  | -0.700406 |   |
| 37            | 1             | 0           | -3.195741               | 3.292855  | -2.011421 |   |
| 38            | 6             | 0           | 3.551482                | 2.383119  | 1.534580  |   |
| 39            | 1             | 0           | 4.097874                | 1.774902  | 2.262406  |   |
| 40            | 1             | 0           | 4.209571                | 2.642644  | 0.700448  |   |
| 41            | 1             | 0           | 3.195715                | 3.292840  | 2.011472  |   |

1.6.17. **DAAN-diOMe/triOMe** of D<sub>1</sub> state optimized with UCAM-B3LYP/6-311+G(d,p)

| Center | Atomic | Atomic | Coordinates (Angstroms) |  |  |
|--------|--------|--------|-------------------------|--|--|
|--------|--------|--------|-------------------------|--|--|

| Center<br>Number | Atomic<br>Number | Atomic<br>Type | Coordinates (Angstroms) |           |           | Z |
|------------------|------------------|----------------|-------------------------|-----------|-----------|---|
|                  |                  |                | X                       | Y         |           |   |
| 1                | 6                | 0              | -3.727867               | 0.057288  | -0.004890 |   |
| 2                | 6                | 0              | -2.536978               | 0.650565  | 0.387465  |   |
| 3                | 6                | 0              | -1.256675               | 0.284972  | -0.197316 |   |
| 4                | 6                | 0              | -1.297260               | -0.779473 | -1.133050 |   |
| 5                | 6                | 0              | -2.463222               | -1.389917 | -1.494608 |   |
| 6                | 6                | 0              | -3.702909               | -0.963563 | -0.950876 |   |
| 7                | 1                | 0              | -4.657019               | 0.370733  | 0.444369  |   |
| 8                | 1                | 0              | -0.365056               | -1.093155 | -1.584462 |   |
| 9                | 1                | 0              | -2.475741               | -2.200138 | -2.212887 |   |
| 10               | 6                | 0              | 1.245820                | 0.300434  | 0.110462  |   |
| 11               | 6                | 0              | 2.437209                | 0.882980  | -0.402193 |   |
| 12               | 6                | 0              | 1.389702                | -1.004958 | 0.662443  |   |
| 13               | 6                | 0              | 3.659586                | 0.220909  | -0.385595 |   |
| 14               | 6                | 0              | 2.589081                | -1.688317 | 0.651540  |   |
| 15               | 6                | 0              | 3.727078                | -1.068669 | 0.133287  |   |
| 16               | 1                | 0              | 4.534508                | 0.696020  | -0.797950 |   |
| 17               | 1                | 0              | 2.695553                | -2.677247 | 1.070653  |   |
| 18               | 6                | 0              | -0.089985               | 2.373614  | 0.301555  |   |
| 19               | 7                | 0              | -0.170113               | 3.518093  | 0.458397  |   |
| 20               | 8                | 0              | -4.790776               | -1.624228 | -1.407490 |   |
| 21               | 8                | 0              | 4.865600                | -1.806322 | 0.185919  |   |
| 22               | 6                | 0              | -6.064877               | -1.258077 | -0.913816 |   |
| 23               | 1                | 0              | -6.288240               | -0.211149 | -1.138768 |   |
| 24               | 1                | 0              | -6.780675               | -1.898503 | -1.423443 |   |
| 25               | 1                | 0              | -6.132590               | -1.424638 | 0.165299  |   |
| 26               | 6                | 0              | 0.666559                | -1.238806 | -0.296089 |   |
| 27               | 1                | 0              | 6.836592                | -1.991698 | -0.143317 |   |
| 28               | 1                | 0              | 5.997049                | -1.005631 | -1.362908 |   |
| 29               | 1                | 0              | 6.330349                | -0.334013 | 0.259628  |   |
| 30               | 6                | 0              | -0.030375               | 0.980371  | 0.112476  |   |
| 31               | 8                | 0              | 2.281005                | 2.104962  | -0.945044 |   |
| 32               | 6                | 0              | 3.405949                | 2.826204  | -1.396095 |   |
| 33               | 1                | 0              | 4.130603                | 2.973373  | -0.589720 |   |
| 34               | 1                | 0              | 3.891057                | 2.324642  | -2.240032 |   |
| 35               | 1                | 0              | 3.025417                | 3.792400  | -1.718627 |   |
| 36               | 8                | 0              | 0.261308                | -1.511171 | 1.215044  |   |
| 37               | 6                | 0              | 0.282446                | -2.825618 | 1.731800  |   |
| 38               | 1                | 0              | 0.544421                | -3.553689 | 0.958402  |   |
| 39               | 1                | 0              | 0.986276                | -2.910435 | 2.565073  |   |
| 40               | 1                | 0              | -0.725653               | -3.022690 | 2.089739  |   |
| 41               | 8                | 0              | -2.452041               | 1.583523  | 1.339501  |   |
| 42               | 6                | 0              | -3.624260               | 2.107062  | 1.929835  |   |
| 43               | 1                | 0              | -4.270111               | 2.560626  | 1.173023  |   |
| 44               | 1                | 0              | -4.173698               | 1.330623  | 2.471245  |   |
| 45               | 1                | 0              | -3.287154               | 2.871803  | 2.624472  |   |

1.6.18. **DAAN-triOMe/triOMe** of D<sub>1</sub> state optimized with UCAM-B3LYP/6-311+G(d,p)

| Center<br>Number | Atomic<br>Number | Atomic<br>Type | Coordinates (Angstroms) |           |           | Z |
|------------------|------------------|----------------|-------------------------|-----------|-----------|---|
|                  |                  |                | X                       | Y         |           |   |
| 1                | 6                | 0              | -3.680352               | 0.246789  | -0.191285 |   |
| 2                | 6                | 0              | -2.487539               | 0.924620  | -0.382806 |   |
| 3                | 6                | 0              | -1.249957               | 0.475662  | 0.179797  |   |
| 4                | 6                | 0              | -1.332015               | -0.720322 | 0.965863  |   |
| 5                | 6                | 0              | -2.504371               | -1.424360 | 1.124391  |   |
| 6                | 6                | 0              | -3.684542               | -0.933981 | 0.554978  |   |
| 7                | 1                | 0              | -4.587199               | 0.615272  | -0.642510 |   |
| 8                | 1                | 0              | -2.562919               | -2.326542 | 1.714386  |   |
| 9                | 6                | 0              | 1.250071                | 0.475640  | -0.179695 |   |
| 10               | 6                | 0              | 2.487770                | 0.924628  | 0.382464  |   |
| 11               | 6                | 0              | 1.331862                | -0.720442 | -0.965544 |   |
| 12               | 6                | 0              | 3.680492                | 0.246623  | 0.190862  |   |
| 13               | 6                | 0              | 2.504126                | -1.424651 | -1.124202 |   |
| 14               | 6                | 0              | 3.684433                | -0.934298 | -0.555133 |   |
| 15               | 1                | 0              | 4.587461                | 0.615133  | 0.641818  |   |
| 16               | 1                | 0              | 2.562448                | -2.326942 | 1.714054  |   |
| 17               | 6                | 0              | 0.000007                | 2.581554  | 0.000584  |   |
| 18               | 7                | 0              | -0.000207               | 3.738521  | 0.000840  |   |
| 19               | 8                | 0              | -4.794384               | -1.676796 | 0.790366  |   |
| 20               | 8                | 0              | 4.794186                | -1.677269 | -0.790582 |   |
| 21               | 6                | 0              | -6.035968               | -1.231427 | 0.281198  |   |
| 22               | 1                | 0              | -6.026390               | -1.191066 | -0.812068 |   |
| 23               | 1                | 0              | -6.772649               | -1.962465 | 0.606496  |   |
| 24               | 1                | 0              | -6.299957               | -0.248494 | 0.682043  |   |
| 25               | 6                | 0              | 6.035888                | -1.231860 | -0.281765 |   |
| 26               | 1                | 0              | 6.772465                | -1.963017 | -0.607032 |   |
| 27               | 1                | 0              | 6.299868                | -0.249035 | -0.682888 |   |
| 28               | 1                | 0              | 6.026535                | -1.191235 | 0.811496  |   |
| 29               | 6                | 0              | 0.000087                | 1.171901  | 0.000192  |   |
| 30               | 8                | 0              | 2.382035                | 2.025352  | 1.143936  |   |
| 31               | 8                | 0              | 0.163491                | -1.083095 | -1.539824 |   |
| 32               | 8                | 0              | -0.163793               | -1.082951 | 1.540382  |   |
| 33               | 8                | 0              | -2.381490               | 2.025110  | -1.144526 |   |
| 34               | 6                | 0              | 3.541025                | 2.622904  | 1.681034  |   |
| 35               | 1                | 0              | 4.038619                | 1.957690  | 2.394633  |   |
| 36               | 1                | 0              | 4.241814                | 2.903683  | 0.889057  |   |
| 37               | 1                | 0              | 3.199578                | 3.518243  | 2.194571  |   |
| 38               | 6                | 0              | 0.111373                | -2.285701 | -2.279153 |   |
| 39               | 1                | 0              | 0.773340                | -2.240217 | -3.149044 |   |
| 40               | 1                | 0              | 0.384120                | -3.145239 | -1.659633 |   |
| 41               | 1                | 0              | -0.918816               | -2.388184 | -2.612316 |   |
| 42               | 6                | 0              | -0.111944               | -2.285347 | 2.280077  |   |

|    |   |   |           |           |           |
|----|---|---|-----------|-----------|-----------|
| 43 | 1 | 0 | -0.774087 | -2.239541 | 3.149818  |
| 44 | 1 | 0 | -0.384647 | -3.145033 | 1.660746  |
| 45 | 1 | 0 | 0.918167  | -2.387829 | 2.613473  |
| 46 | 6 | 0 | -3.540289 | 2.622654  | -1.682060 |
| 47 | 1 | 0 | -4.037797 | 1.957291  | -2.395579 |
| 48 | 1 | 0 | -4.241212 | 2.903735  | -0.890311 |
| 49 | 1 | 0 | -3.198618 | 3.517808  | -2.195767 |

1.6.19. **DAAN-OMe/diOMe-m** of D<sub>1</sub> state optimized with UCAM-B3LYP/6-311+G(d,p)

| Center<br>Number | Atomic<br>Number | Atomic<br>Type | Coordinates (Angstroms) |           |           | Z |
|------------------|------------------|----------------|-------------------------|-----------|-----------|---|
|                  |                  |                | X                       | Y         |           |   |
| 1                | 6                | 0              | -4.165261               | 0.624739  | -0.468019 |   |
| 2                | 6                | 0              | -2.864453               | 1.078707  | -0.547161 |   |
| 3                | 6                | 0              | -1.775716               | 0.360162  | 0.000302  |   |
| 4                | 6                | 0              | -2.098492               | -0.855177 | 0.655238  |   |
| 5                | 6                | 0              | -3.391003               | -1.312740 | 0.737802  |   |
| 6                | 6                | 0              | -4.444158               | -0.585791 | 0.170137  |   |
| 7                | 1                | 0              | -4.954992               | 1.216596  | -0.909759 |   |
| 8                | 1                | 0              | -2.669210               | 2.021516  | -1.042913 |   |
| 9                | 1                | 0              | -1.322552               | -1.421495 | 1.151216  |   |
| 10               | 1                | 0              | -3.623271               | -2.236752 | 1.252833  |   |
| 11               | 6                | 0              | 0.787208                | 0.172790  | -0.001893 |   |
| 12               | 6                | 0              | 2.006949                | 0.849526  | 0.170440  |   |
| 13               | 6                | 0              | 0.877074                | -1.269299 | -0.177070 |   |
| 14               | 6                | 0              | 3.216684                | 0.179502  | 0.186807  |   |
| 15               | 1                | 0              | 1.988477                | 1.920665  | 0.302753  |   |
| 16               | 6                | 0              | 2.085633                | -1.930952 | -0.169596 |   |
| 17               | 1                | 0              | -0.021811               | -1.833405 | -0.370463 |   |
| 18               | 6                | 0              | 3.284530                | -1.255985 | -0.007962 |   |
| 19               | 1                | 0              | 2.123148                | -3.004540 | -0.307782 |   |
| 20               | 6                | 0              | -0.318737               | 2.301413  | -0.228366 |   |
| 21               | 7                | 0              | -0.187335               | 3.443414  | -0.364316 |   |
| 22               | 8                | 0              | -5.679157               | -1.129766 | 0.292172  |   |
| 23               | 8                | 0              | 4.447912                | -1.937865 | 0.089117  |   |
| 24               | 6                | 0              | -6.781580               | -0.438022 | -0.261725 |   |
| 25               | 1                | 0              | -6.674111               | -0.322071 | -1.344227 |   |
| 26               | 1                | 0              | -7.656235               | -1.048570 | -0.049689 |   |
| 27               | 1                | 0              | -6.905598               | 0.545748  | 0.200365  |   |
| 28               | 6                | 0              | 5.456259                | -1.690266 | -0.893798 |   |
| 29               | 1                | 0              | 6.272895                | -2.370139 | -0.661099 |   |
| 30               | 1                | 0              | 5.067695                | -1.912845 | -1.891257 |   |
| 31               | 1                | 0              | 5.809209                | -0.660616 | -0.849253 |   |
| 32               | 6                | 0              | -0.438696               | 0.907201  | -0.056044 |   |
| 33               | 8                | 0              | 4.384697                | 0.767919  | 0.403928  |   |
| 34               | 6                | 0              | 4.437628                | 2.172532  | 0.659582  |   |
| 35               | 1                | 0              | 3.865525                | 2.417436  | 1.555407  |   |
| 36               | 1                | 0              | 5.488611                | 2.399392  | 0.814003  |   |
| 37               | 1                | 0              | 4.052723                | 2.732832  | -0.193713 |   |

1.6.20. **DAAN-diOMe-m/diOMe-m** of D<sub>1</sub> state optimized with UCAM-B3LYP/6-311+G(d,p)

| Center<br>Number | Atomic<br>Number | Atomic<br>Type | Coordinates (Angstroms) |           |           | Z |
|------------------|------------------|----------------|-------------------------|-----------|-----------|---|
|                  |                  |                | X                       | Y         |           |   |
| 1                | 6                | 0              | 3.708259                | 0.215390  | 0.214030  |   |
| 2                | 6                | 0              | 2.444948                | 0.752285  | 0.284091  |   |
| 3                | 6                | 0              | 1.285706                | 0.002168  | -0.027714 |   |
| 4                | 6                | 0              | 1.498628                | -1.361547 | -0.421709 |   |
| 5                | 6                | 0              | 2.762418                | -1.892240 | -0.506203 |   |
| 6                | 6                | 0              | 3.898237                | -1.140843 | -0.211057 |   |
| 7                | 1                | 0              | 2.318745                | 1.777662  | 0.597117  |   |
| 8                | 1                | 0              | 0.662043                | -1.972016 | -0.722672 |   |
| 9                | 1                | 0              | 2.911263                | -2.916652 | -0.824540 |   |
| 10               | 6                | 0              | -1.285667               | 0.002126  | 0.027749  |   |
| 11               | 6                | 0              | -2.444928               | 0.752184  | -0.284126 |   |
| 12               | 6                | 0              | -1.498551               | -1.361566 | 0.421876  |   |
| 13               | 6                | 0              | -3.708225               | 0.215254  | -0.214030 |   |
| 14               | 1                | 0              | -2.318751               | 1.777545  | -0.597206 |   |
| 15               | 6                | 0              | -2.762322               | -1.892288 | 0.506408  |   |
| 16               | 1                | 0              | -0.661948               | -1.971978 | 0.722908  |   |
| 17               | 6                | 0              | -3.898154               | -1.140943 | 0.211158  |   |
| 18               | 1                | 0              | -2.911150               | -2.916674 | 0.824838  |   |
| 19               | 6                | 0              | -0.000024               | 2.051194  | -0.000050 |   |
| 20               | 7                | 0              | -0.000077               | 3.208369  | -0.000094 |   |
| 21               | 8                | 0              | 5.092385                | -1.769176 | -0.252584 |   |
| 22               | 8                | 0              | -5.092312               | -1.769224 | 0.252701  |   |
| 23               | 6                | 0              | 6.250774                | -1.109252 | -0.764684 |   |
| 24               | 1                | 0              | 6.724442                | -0.496349 | -0.000445 |   |
| 25               | 1                | 0              | 6.924033                | -1.904830 | -1.079064 |   |
| 26               | 1                | 0              | 5.991507                | -0.487295 | -1.623980 |   |
| 27               | 6                | 0              | -6.250723               | -1.108967 | 0.764302  |   |
| 28               | 1                | 0              | -6.924154               | -1.904329 | 1.078855  |   |
| 29               | 1                | 0              | -5.991556               | -0.486688 | 1.623396  |   |
| 30               | 1                | 0              | -6.724135               | -0.496307 | -0.000298 |   |
| 31               | 6                | 0              | 0.000009                | 0.639160  | 0.000001  |   |
| 32               | 8                | 0              | -4.826132               | 0.880334  | -0.555086 |   |
| 33               | 6                | 0              | -4.716739               | 2.221917  | -1.012549 |   |
| 34               | 1                | 0              | -4.115344               | 2.273820  | -1.922823 |   |
| 35               | 1                | 0              | -5.732953               | 2.544926  | -1.224119 |   |
| 36               | 1                | 0              | -4.276561               | 2.861970  | -0.244751 |   |
| 37               | 8                | 0              | 4.826089                | 0.880574  | 0.555142  |   |

|    |   |   |          |          |          |
|----|---|---|----------|----------|----------|
| 38 | 6 | 0 | 4.716495 | 2.222151 | 1.012565 |
| 39 | 1 | 0 | 5.732649 | 2.545293 | 1.224218 |
| 40 | 1 | 0 | 4.276304 | 2.862132 | 0.244713 |
| 41 | 1 | 0 | 4.115011 | 2.274005 | 1.922784 |

1.7. DAAN geometries of  $S_0$  state optimized with UoB97X-D/6-311+G(d,p)

1.7.1. DAAN-H/H of  $S_0$  state optimized with UoB97X-D/6-311+G(d,p)

| Center Number | Atomic Number | Atomic Type | Coordinates (Angstroms) |           |           |
|---------------|---------------|-------------|-------------------------|-----------|-----------|
|               |               |             | X                       | Y         | Z         |
| 1             | 6             | 0           | 2.572735                | -0.684028 | 1.550003  |
| 2             | 6             | 0           | 1.436160                | -0.031322 | 1.097014  |
| 3             | 6             | 0           | 1.262867                | 0.211312  | -0.264043 |
| 4             | 6             | 0           | 2.235858                | -0.207524 | -1.163649 |
| 5             | 6             | 0           | 3.374810                | -0.866262 | -0.710099 |
| 6             | 6             | 0           | 3.544722                | -1.104742 | 0.646537  |
| 7             | 1             | 0           | 2.701365                | -0.867122 | 2.610639  |
| 8             | 1             | 0           | 0.675479                | 0.289126  | 1.801521  |
| 9             | 1             | 0           | 2.108699                | -0.017634 | -2.224833 |
| 10            | 1             | 0           | 4.127971                | -1.189965 | -1.419380 |
| 11            | 6             | 0           | -1.268631               | 0.169167  | -0.370279 |
| 12            | 6             | 0           | -2.234604               | 0.716328  | 0.465583  |
| 13            | 6             | 0           | -1.446338               | -1.122650 | -0.866154 |
| 14            | 6             | 0           | -3.366674               | -0.020739 | 0.803507  |
| 15            | 1             | 0           | -2.111601               | 1.721559  | 0.853817  |
| 16            | 6             | 0           | -2.575645               | -1.854263 | -0.532549 |
| 17            | 1             | 0           | -0.688097               | -1.560307 | -1.508048 |
| 18            | 6             | 0           | -3.540678               | -1.304151 | 0.306555  |
| 19            | 1             | 0           | -4.113171               | 0.416373  | 1.456830  |
| 20            | 1             | 0           | -2.703129               | -2.856579 | -0.925441 |
| 21            | 6             | 0           | -0.003890               | 2.311639  | -0.312646 |
| 22            | 7             | 0           | -0.003487               | 3.404291  | 0.045975  |
| 23            | 1             | 0           | 4.431761                | -1.616445 | 1.002013  |
| 24            | 1             | 0           | -4.423198               | -1.876014 | 0.569512  |
| 25            | 6             | 0           | 0.004234                | 0.916094  | -0.763352 |
| 26            | 1             | 0           | 0.048771                | 0.953814  | -1.857017 |

1.7.2. DAAN-H/Me of  $S_0$  state optimized with UoB97X-D/6-311+G(d,p)

| Center Number | Atomic Number | Atomic Type | Coordinates (Angstroms) |           |           |
|---------------|---------------|-------------|-------------------------|-----------|-----------|
|               |               |             | X                       | Y         | Z         |
| 1             | 6             | 0           | -2.985176               | 0.562064  | 0.649651  |
| 2             | 6             | 0           | -3.346537               | -0.656775 | 0.087368  |
| 3             | 6             | 0           | -2.419442               | -1.296346 | -0.740629 |
| 4             | 6             | 0           | -1.180115               | -0.734214 | -0.993280 |
| 5             | 6             | 0           | -0.828202               | 0.491870  | -0.427429 |
| 6             | 6             | 0           | -1.740994               | 1.134889  | 0.396356  |
| 7             | 1             | 0           | -3.683338               | 1.080906  | 1.298645  |
| 8             | 1             | 0           | -2.673696               | -2.251397 | -1.189985 |
| 9             | 1             | 0           | -0.470314               | -1.257848 | -1.626347 |
| 10            | 1             | 0           | -1.490848               | 2.089858  | 0.845960  |
| 11            | 6             | 0           | 0.558378                | 1.053058  | -0.731784 |
| 12            | 1             | 0           | 0.653666                | 1.148997  | -1.818783 |
| 13            | 6             | 0           | 1.674953                | 0.135141  | -0.240780 |
| 14            | 6             | 0           | 2.618710                | -0.360540 | -1.132449 |
| 15            | 6             | 0           | 1.745919                | -0.224405 | 1.103507  |
| 16            | 6             | 0           | 3.626760                | -1.211037 | -0.688144 |
| 17            | 1             | 0           | 2.571173                | -0.081163 | -2.180332 |
| 18            | 6             | 0           | 2.752709                | -1.068254 | 1.547839  |
| 19            | 1             | 0           | 1.006360                | 0.155384  | 1.800953  |
| 20            | 6             | 0           | 3.695378                | -1.565225 | 0.652020  |
| 21            | 1             | 0           | 4.357620                | -1.593439 | -1.391550 |
| 22            | 1             | 0           | 2.802453                | -1.341331 | 2.595715  |
| 23            | 6             | 0           | 0.744707                | 2.403906  | -0.191812 |
| 24            | 7             | 0           | 0.896859                | 3.460474  | 0.236117  |
| 25            | 6             | 0           | -4.697163               | -1.271738 | 0.342738  |
| 26            | 1             | 0           | -5.319391               | -1.229847 | -0.556302 |
| 27            | 1             | 0           | -4.603980               | -2.322585 | 0.628826  |
| 28            | 1             | 0           | -5.227527               | -0.748811 | 1.140729  |
| 29            | 1             | 0           | 4.480500                | -2.226394 | 1.000615  |

1.7.3. DAAN-H/OME of  $S_0$  state optimized with UoB97X-D/6-311+G(d,p)

| Center Number | Atomic Number | Atomic Type | Coordinates (Angstroms) |           |           |
|---------------|---------------|-------------|-------------------------|-----------|-----------|
|               |               |             | X                       | Y         | Z         |
| 1             | 6             | 0           | -3.902907               | -0.768517 | -1.001097 |
| 2             | 6             | 0           | -2.997472               | 0.254599  | -0.730697 |
| 3             | 6             | 0           | -2.050326               | 0.102491  | 0.274779  |
| 4             | 6             | 0           | -2.018236               | -1.084165 | 1.008118  |
| 5             | 6             | 0           | -2.922768               | -2.100223 | 0.741650  |
| 6             | 6             | 0           | -3.869362               | -1.945285 | -0.267491 |
| 7             | 1             | 0           | -4.636295               | -0.638177 | -1.788748 |
| 8             | 1             | 0           | -3.036663               | 1.172946  | -1.306368 |
| 9             | 1             | 0           | -1.270244               | -1.214941 | 1.783822  |
| 10            | 1             | 0           | -2.888468               | -3.016664 | 1.319855  |
| 11            | 6             | 0           | 0.412118                | 0.690833  | 0.445073  |
| 12            | 6             | 0           | 0.849953                | 0.196641  | -0.776303 |
| 13            | 6             | 0           | 1.304261                | 0.717310  | 1.514726  |
| 14            | 6             | 0           | 2.150640                | -0.262915 | -0.941230 |
| 15            | 1             | 0           | 0.166971                | 0.162700  | -1.619081 |

|    |   |   |           |           |           |
|----|---|---|-----------|-----------|-----------|
| 16 | 6 | 0 | 2.602195  | 0.258897  | 1.369277  |
| 17 | 1 | 0 | 0.983360  | 1.103089  | 2.477352  |
| 18 | 6 | 0 | 3.034500  | -0.233623 | 0.137872  |
| 19 | 1 | 0 | 2.458205  | -0.639330 | -1.907734 |
| 20 | 1 | 0 | 3.300161  | 0.275562  | 2.197420  |
| 21 | 6 | 0 | -1.230733 | 2.412982  | -0.152140 |
| 22 | 7 | 0 | -1.385722 | 3.377970  | -0.758441 |
| 23 | 8 | 0 | 4.319062  | -0.659255 | 0.087718  |
| 24 | 6 | 0 | 4.813882  | -1.156431 | -1.137487 |
| 25 | 1 | 0 | 5.850838  | -1.430966 | -0.952808 |
| 26 | 1 | 0 | 4.258091  | -2.042938 | -1.462843 |
| 27 | 1 | 0 | 4.776567  | -0.393123 | -1.922575 |
| 28 | 1 | 0 | -4.575712 | -2.740107 | -0.478273 |
| 29 | 6 | 0 | -1.021999 | 1.179918  | 0.615128  |
| 30 | 1 | 0 | -1.161714 | 1.455128  | 1.666266  |

1.7.4. DAAN-Me/OME of  $S_0$  state optimized with UoB97X-D/6-311+G(d,p)

| Center Number | Atomic Number | Atomic Type | Coordinates (Angstroms) |           |           |
|---------------|---------------|-------------|-------------------------|-----------|-----------|
|               |               |             | X                       | Y         | Z         |
| 1             | 6             | 0           | -3.641438               | -0.120058 | -0.879957 |
| 2             | 6             | 0           | -2.592723               | 0.779026  | -0.697761 |
| 3             | 6             | 0           | -1.664171               | 0.577731  | 0.313194  |
| 4             | 6             | 0           | -1.802064               | -0.539002 | 1.139151  |
| 5             | 6             | 0           | -2.848321               | -1.426200 | 0.955915  |
| 6             | 6             | 0           | -3.789244               | -1.232325 | -0.059980 |
| 7             | 1             | 0           | -4.355246               | 0.055844  | -1.678350 |
| 8             | 1             | 0           | -2.508469               | 1.640417  | -1.351586 |
| 9             | 1             | 0           | -1.073386               | -0.719593 | 1.923450  |
| 10            | 1             | 0           | -2.937551               | -2.288272 | 1.609669  |
| 11            | 6             | 0           | 0.862531                | 0.809531  | 0.406405  |
| 12            | 6             | 0           | 1.171579                | 0.118952  | -0.757702 |
| 13            | 6             | 0           | 1.802847                | 0.842655  | 1.433850  |
| 14            | 6             | 0           | 2.392229                | -0.527719 | -0.907541 |
| 15            | 1             | 0           | 0.448091                | 0.075985  | -1.565461 |
| 16            | 6             | 0           | 3.021739                | 0.199925  | 1.303353  |
| 17            | 1             | 0           | 1.582780                | 1.379877  | 2.351149  |
| 18            | 6             | 0           | 3.325071                | -0.489093 | 0.129024  |
| 19            | 1             | 0           | 2.599807                | -1.055056 | -1.829124 |
| 20            | 1             | 0           | 3.756046                | 0.220584  | 2.099381  |
| 21            | 6             | 0           | -0.527844               | 2.704188  | -0.295486 |
| 22            | 7             | 0           | -0.554509               | 3.635769  | -0.969596 |
| 23            | 8             | 0           | 4.539842                | -1.086811 | 0.089211  |
| 24            | 6             | 0           | 4.904839                | -1.786757 | -1.081029 |
| 25            | 1             | 0           | 5.905605                | -2.174259 | -0.899034 |
| 26            | 1             | 0           | 4.223902                | -2.622910 | -1.275765 |
| 27            | 1             | 0           | 4.927383                | -1.123450 | -1.952800 |
| 28            | 6             | 0           | -4.928251               | -2.200370 | -0.242478 |
| 29            | 1             | 0           | -4.563211               | -3.228372 | -0.314932 |
| 30            | 1             | 0           | -5.617089               | -2.155700 | 0.606299  |
| 31            | 1             | 0           | -5.497135               | -1.978659 | -1.147319 |
| 32            | 6             | 0           | -0.482548               | 1.512165  | 0.559266  |
| 33            | 1             | 0           | -0.554074               | 1.880699  | 1.588559  |

1.7.5. DAAN-OME/OME of  $S_0$  state optimized with UoB97X-D/6-311+G(d,p)

| Center Number | Atomic Number | Atomic Type | Coordinates (Angstroms) |           |           |
|---------------|---------------|-------------|-------------------------|-----------|-----------|
|               |               |             | X                       | Y         | Z         |
| 1             | 6             | 0           | -2.650192               | -0.706037 | -0.888045 |
| 2             | 6             | 0           | -1.482436               | 0.032440  | -0.740172 |
| 3             | 6             | 0           | -1.284896               | 0.851055  | 0.363514  |
| 4             | 6             | 0           | -2.283800               | 0.919301  | 1.332405  |
| 5             | 6             | 0           | -3.451108               | 0.186886  | 1.203567  |
| 6             | 6             | 0           | -3.642650               | -0.630215 | 0.089320  |
| 7             | 1             | 0           | -2.770672               | -1.332948 | -1.761536 |
| 8             | 1             | 0           | -0.711045               | -0.040053 | -1.500014 |
| 9             | 1             | 0           | -2.150832               | 1.555410  | 2.202011  |
| 10            | 1             | 0           | -4.230127               | 0.234153  | 1.954690  |
| 11            | 6             | 0           | 1.256207                | 0.801120  | 0.383049  |
| 12            | 6             | 0           | 2.224159                | 1.012327  | -0.584119 |
| 13            | 6             | 0           | 1.430518                | -0.256246 | 1.282221  |
| 14            | 6             | 0           | 3.352220                | 0.194746  | -0.667743 |
| 15            | 1             | 0           | 2.116305                | 1.826235  | -1.292962 |
| 16            | 6             | 0           | 2.541483                | -1.070438 | 1.215177  |
| 17            | 1             | 0           | 0.675164                | -0.447824 | 2.037944  |
| 18            | 6             | 0           | 3.514516                | -0.850162 | 0.234322  |
| 19            | 1             | 0           | 4.085714                | 0.392650  | -1.437984 |
| 20            | 1             | 0           | 2.680827                | -1.889442 | 1.910425  |
| 21            | 6             | 0           | -0.001028               | 2.784422  | -0.427302 |
| 22            | 7             | 0           | -0.008960               | 3.663108  | -1.169559 |
| 23            | 8             | 0           | -4.814044               | -1.308898 | 0.046113  |
| 24            | 8             | 0           | 4.567633                | -1.702597 | 0.246514  |
| 25            | 6             | 0           | -5.068477               | -2.137295 | -1.068130 |
| 26            | 1             | 0           | -4.330568               | -2.943822 | -1.143977 |
| 27            | 1             | 0           | -6.054381               | -2.567999 | -0.902871 |
| 28            | 1             | 0           | -5.077440               | -1.561512 | -2.000267 |
| 29            | 6             | 0           | 5.82876                 | -1.523475 | -0.717335 |
| 30            | 1             | 0           | 6.319671                | -2.301631 | -0.526310 |
| 31            | 1             | 0           | 5.192543                | -1.637328 | -1.734940 |
| 32            | 1             | 0           | 6.059539                | -0.541852 | -0.617699 |
| 33            | 6             | 0           | 0.000885                | 1.658116  | 0.513608  |
| 34            | 1             | 0           | -0.000365               | 2.106892  | 1.513368  |

1.7.6. **DAAN-SMe/OMe** of  $S_0$  state optimized with UoB97X-D/6-311+G(d,p)

| Center<br>Number | Atomic<br>Number | Atomic<br>Type | Coordinates (Angstroms) |           |           |
|------------------|------------------|----------------|-------------------------|-----------|-----------|
|                  |                  |                | X                       | Y         | Z         |
| 1                | 6                | 0              | -2.919776               | -0.750007 | -0.918484 |
| 2                | 6                | 0              | -1.803590               | 0.060802  | -0.753549 |
| 3                | 6                | 0              | -1.659833               | 0.866105  | 0.368169  |
| 4                | 6                | 0              | -2.660322               | 0.847410  | 1.337605  |
| 5                | 6                | 0              | -3.776605               | 0.042387  | 1.191584  |
| 6                | 6                | 0              | -3.914234               | -0.761706 | 0.059907  |
| 7                | 1                | 0              | -2.998556               | -1.363836 | -1.805836 |
| 8                | 1                | 0              | -1.030395               | 0.056511  | -1.515068 |
| 9                | 1                | 0              | -2.569301               | 1.471884  | 2.220918  |
| 10               | 1                | 0              | -4.556733               | 0.021757  | 1.942746  |
| 11               | 6                | 0              | 0.877262                | 0.969090  | 0.414846  |
| 12               | 6                | 0              | 1.843233                | 1.250156  | -0.538463 |
| 13               | 6                | 0              | 1.102398                | -0.085485 | 1.302715  |
| 14               | 6                | 0              | 3.015260                | 0.499564  | -0.613692 |
| 15               | 1                | 0              | 1.695838                | 2.064929  | -1.239189 |
| 16               | 6                | 0              | 2.262845                | -0.831573 | 1.238717  |
| 17               | 1                | 0              | 0.351312                | -0.331663 | 2.046679  |
| 18               | 6                | 0              | 3.237549                | -0.547641 | 0.273518  |
| 19               | 1                | 0              | 3.743141                | 0.751339  | -1.373954 |
| 20               | 1                | 0              | 2.418125                | -1.644885 | 1.939459  |
| 21               | 6                | 0              | -0.487002               | 2.880700  | -0.395220 |
| 22               | 7                | 0              | -0.538949               | 3.762454  | -1.131941 |
| 23               | 8                | 0              | -5.037619               | -1.515528 | 0.002030  |
| 24               | 6                | 0              | -5.235088               | -2.340881 | -1.126180 |
| 25               | 1                | 0              | -4.441590               | -3.091102 | -1.216561 |
| 26               | 1                | 0              | -6.187362               | -2.843450 | -0.966955 |
| 27               | 1                | 0              | -5.287523               | -1.751362 | -2.048206 |
| 28               | 6                | 0              | 5.676814                | -0.890299 | -1.064389 |
| 29               | 1                | 0              | 6.585488                | -1.492168 | -1.091357 |
| 30               | 1                | 0              | 5.167667                | -0.980030 | -2.025083 |
| 31               | 1                | 0              | 5.949015                | 0.148610  | -0.872586 |
| 32               | 6                | 0              | -0.428062               | 1.749460  | 0.537774  |
| 33               | 1                | 0              | -0.465195               | 2.188473  | 1.541071  |
| 34               | 16               | 0              | 4.682161                | -1.572904 | 0.280133  |

1.7.7. **DAAN-F/F** of  $S_0$  state optimized with UoB97X-D/6-311+G(d,p)

| Center<br>Number | Atomic<br>Number | Atomic<br>Type | Coordinates (Angstroms) |           |           |
|------------------|------------------|----------------|-------------------------|-----------|-----------|
|                  |                  |                | X                       | Y         | Z         |
| 1                | 6                | 0              | -2.585345               | -0.683912 | -1.302422 |
| 2                | 6                | 0              | -1.449406               | 0.033618  | -0.963902 |
| 3                | 6                | 0              | -1.262508               | 0.497283  | 0.337181  |
| 4                | 6                | 0              | -2.228989               | 0.232279  | 1.299908  |
| 5                | 6                | 0              | -3.373711               | -0.490019 | 0.979536  |
| 6                | 6                | 0              | -3.528100               | -0.933774 | -0.318855 |
| 7                | 1                | 0              | -2.747114               | -1.049944 | -2.308417 |
| 8                | 1                | 0              | -0.697354               | 0.231900  | -1.720213 |
| 9                | 1                | 0              | -2.096691               | 0.592369  | 2.314886  |
| 10               | 1                | 0              | -4.134914               | -0.705577 | 1.718581  |
| 11               | 6                | 0              | 1.273893                | 0.496074  | 0.391267  |
| 12               | 6                | 0              | 2.245883                | 0.958269  | -0.488072 |
| 13               | 6                | 0              | 1.455283                | -0.737452 | 1.017682  |
| 14               | 6                | 0              | 3.387333                | 0.204530  | -0.744478 |
| 15               | 1                | 0              | 2.123959                | 1.916138  | -0.981343 |
| 16               | 6                | 0              | 2.587416                | -1.498624 | 0.776583  |
| 17               | 1                | 0              | 0.695939                | -1.114692 | 1.694887  |
| 18               | 6                | 0              | 3.536185                | -1.009773 | -0.106201 |
| 19               | 1                | 0              | 4.151461                | 0.553266  | -1.427617 |
| 20               | 1                | 0              | 2.740399                | -2.456995 | 1.256566  |
| 21               | 6                | 0              | -0.020335               | 2.592068  | 0.053403  |
| 22               | 7                | 0              | -0.040120               | 3.620026  | -0.461599 |
| 23               | 6                | 0              | -0.002084               | 1.276133  | 0.701000  |
| 24               | 1                | 0              | -0.025143               | 1.472212  | 1.778427  |
| 25               | 9                | 0              | -4.628975               | -1.633251 | -0.640530 |
| 26               | 9                | 0              | 4.635330                | -1.744423 | -0.347287 |

1.7.8. **DAAN-F/OMe** of  $S_0$  state optimized with UoB97X-D/6-311+G(d,p)

| Center<br>Number | Atomic<br>Number | Atomic<br>Type | Coordinates (Angstroms) |           |           |
|------------------|------------------|----------------|-------------------------|-----------|-----------|
|                  |                  |                | X                       | Y         | Z         |
| 1                | 6                | 0              | -3.714303               | -0.138015 | -0.843665 |
| 2                | 6                | 0              | -2.677246               | 0.766173  | -0.633334 |
| 3                | 6                | 0              | -1.694098               | 0.510674  | 0.315258  |
| 4                | 6                | 0              | -1.758599               | -0.668628 | 1.058481  |
| 5                | 6                | 0              | -2.786532               | -1.577219 | 0.865221  |
| 6                | 6                | 0              | -3.749136               | -1.292463 | -0.088936 |
| 7                | 1                | 0              | -4.484788               | 0.049189  | -1.580942 |
| 8                | 1                | 0              | -2.644753               | 1.677649  | -1.219674 |
| 9                | 1                | 0              | -0.986833               | -0.886033 | 1.789480  |
| 10               | 1                | 0              | -2.847630               | -2.495336 | 1.435928  |
| 11               | 6                | 0              | 0.827059                | 0.800876  | 0.422552  |
| 12               | 6                | 0              | 1.180347                | 0.200743  | -0.778722 |
| 13               | 6                | 0              | 1.735165                | 0.769917  | 1.478599  |
| 14               | 6                | 0              | 2.412973                | -0.420143 | -0.936839 |
| 15               | 1                | 0              | 0.483895                | 0.211083  | -1.611073 |
| 16               | 6                | 0              | 2.965688                | 0.151560  | 1.399771  |

|    |   |   |           |           |           |
|----|---|---|-----------|-----------|-----------|
| 17 | 1 | 0 | 1.480813  | 1.236997  | 2.424986  |
| 18 | 6 | 0 | 3.313407  | -0.447329 | 0.128730  |
| 19 | 1 | 0 | 2.655721  | -0.875586 | -1.887638 |
| 20 | 1 | 0 | 3.675608  | 0.122996  | 2.157337  |
| 21 | 6 | 0 | -0.608727 | 2.676521  | -0.241206 |
| 22 | 7 | 0 | -0.662134 | 3.620827  | -0.895546 |
| 23 | 8 | 0 | 4.535699  | -1.026880 | 0.083809  |
| 24 | 6 | 0 | 4.945741  | -1.637868 | -1.121456 |
| 25 | 1 | 0 | 5.944809  | -2.027440 | -0.935143 |
| 26 | 1 | 0 | 4.281383  | -2.464565 | -1.396600 |
| 27 | 1 | 0 | 4.987766  | -0.913433 | -1.942243 |
| 28 | 6 | 0 | -0.534098 | 1.467447  | 0.586474  |
| 29 | 1 | 0 | -0.617858 | 1.811185  | 1.623479  |
| 30 | 9 | 0 | -4.747182 | -2.172324 | -0.285012 |

1.7.9. **DAAN-Br/OMe** of  $S_0$  state optimized with UoB97X-D/6-311+G(d,p)

| Center<br>Number | Atomic<br>Number | Atomic<br>Type | Coordinates (Angstroms) |           |           |
|------------------|------------------|----------------|-------------------------|-----------|-----------|
|                  |                  |                | X                       | Y         | Z         |
| 1                | 6                | 0              | -2.673015               | 0.869793  | -0.756287 |
| 2                | 6                | 0              | -1.461822               | 1.540446  | -0.611056 |
| 3                | 6                | 0              | -0.541931               | 1.141735  | 0.350251  |
| 4                | 6                | 0              | -0.848703               | 0.057219  | 1.171750  |
| 5                | 6                | 0              | -2.052308               | -0.616480 | 1.041877  |
| 6                | 6                | 0              | -2.958681               | -0.202981 | 0.071908  |
| 7                | 1                | 0              | -3.383292               | 1.186203  | -1.509610 |
| 8                | 1                | 0              | -1.244544               | 2.382488  | -1.258889 |
| 9                | 1                | 0              | -0.131591               | -0.275257 | 1.915208  |
| 10               | 1                | 0              | -2.282765               | -1.456856 | 1.684358  |
| 11               | 6                | 0              | 1.980205                | 0.876586  | 0.394934  |
| 12               | 6                | 0              | 2.164012                | 0.169163  | -0.785643 |
| 13               | 6                | 0              | 2.880412                | 0.681006  | 1.440097  |
| 14               | 6                | 0              | 3.222315                | -0.718308 | -0.934104 |
| 15               | 1                | 0              | 1.470282                | 0.305491  | -1.609148 |
| 16               | 6                | 0              | 3.937617                | -0.202833 | 1.310697  |
| 17               | 1                | 0              | 2.757448                | 1.227474  | 2.370002  |
| 18               | 6                | 0              | 4.116096                | -0.908454 | 0.120452  |
| 19               | 1                | 0              | 3.336496                | -1.251165 | -1.868629 |
| 20               | 1                | 0              | 4.640507                | -0.360412 | 2.119584  |
| 21               | 6                | 0              | 0.969828                | 2.990821  | -0.338287 |
| 22               | 7                | 0              | 1.103099                | 3.891748  | -1.040538 |
| 23               | 8                | 0              | 5.175833                | -1.749246 | 0.083728  |
| 24               | 6                | 0              | 5.411572                | -2.482126 | -1.100241 |
| 25               | 1                | 0              | 6.301284                | -3.079608 | -0.910486 |
| 26               | 1                | 0              | 4.572409                | -3.147361 | -1.332008 |
| 27               | 1                | 0              | 5.597428                | -1.817249 | -1.950896 |
| 28               | 35               | 0              | -4.608285               | -1.125100 | -0.118865 |
| 29               | 6                | 0              | 0.804582                | 1.834699  | 0.549562  |
| 30               | 1                | 0              | 0.826901                | 2.234752  | 1.569260  |

1.7.10. **DAAN-Ac/OMe** of  $S_0$  state optimized with UoB97X-D/6-311+G(d,p)

| Center<br>Number | Atomic<br>Number | Atomic<br>Type | Coordinates (Angstroms) |           |           |
|------------------|------------------|----------------|-------------------------|-----------|-----------|
|                  |                  |                | X                       | Y         | Z         |
| 1                | 6                | 0              | -2.426538               | -0.319391 | -1.052433 |
| 2                | 6                | 0              | -1.241397               | 0.374229  | -0.868943 |
| 3                | 6                | 0              | -0.973748               | 0.994590  | 0.348394  |
| 4                | 6                | 0              | -1.904676               | 0.909087  | 1.378908  |
| 5                | 6                | 0              | -3.088123               | 0.208807  | 1.198306  |
| 6                | 6                | 0              | -3.361701               | -0.412029 | -0.018807 |
| 7                | 1                | 0              | -2.615160               | -0.791599 | -2.009280 |
| 8                | 1                | 0              | -0.516314               | 0.432429  | -1.673794 |
| 9                | 1                | 0              | -1.705185               | 1.393716  | 2.329280  |
| 10               | 1                | 0              | -3.818849               | 0.133289  | 1.994755  |
| 11               | 6                | 0              | 1.547955                | 0.808332  | 0.415713  |
| 12               | 6                | 0              | 2.516277                | 0.968263  | -0.561088 |
| 13               | 6                | 0              | 1.665646                | -0.263715 | 1.306208  |
| 14               | 6                | 0              | 3.590498                | 0.083853  | -0.662390 |
| 15               | 1                | 0              | 2.452442                | 1.794248  | -1.261285 |
| 16               | 6                | 0              | 2.723303                | -1.144435 | 1.220574  |
| 17               | 1                | 0              | 0.910718                | -0.413981 | 2.071757  |
| 18               | 6                | 0              | 3.697214                | -0.976854 | 0.230232  |
| 19               | 1                | 0              | 4.327933                | 0.242791  | -1.437835 |
| 20               | 1                | 0              | 2.819698                | -1.975393 | 1.908754  |
| 21               | 6                | 0              | 0.419480                | 2.888849  | -0.343439 |
| 22               | 7                | 0              | 0.474083                | 3.787669  | -1.058632 |
| 23               | 8                | 0              | 4.695091                | -1.891480 | 0.224622  |
| 24               | 6                | 0              | 5.709016                | -1.769841 | -0.750349 |
| 25               | 1                | 0              | 6.397523                | -2.593713 | -0.571940 |
| 26               | 1                | 0              | 5.300571                | -1.853071 | -1.763683 |
| 27               | 1                | 0              | 6.247098                | -0.820671 | -0.650288 |
| 28               | 6                | 0              | -4.656870               | -1.158220 | -0.164735 |
| 29               | 8                | 0              | -5.429761               | -1.231728 | 0.763728  |
| 30               | 6                | 0              | -4.968878               | -1.810884 | -1.491652 |
| 31               | 1                | 0              | -4.985535               | -1.067057 | -2.293116 |
| 32               | 1                | 0              | -4.206548               | -2.553260 | -1.744314 |
| 33               | 1                | 0              | -5.940640               | -2.296604 | -1.425271 |
| 34               | 6                | 0              | 0.343762                | 1.735246  | 0.558189  |
| 35               | 1                | 0              | 0.343717                | 2.145520  | 1.573770  |

1.7.11. **DAAN-COOMe/OMe** of  $S_0$  state optimized with UoB97X-D/6-311+G(d,p)

| Center<br>Number | Atomic<br>Number | Atomic<br>Type | Coordinates (Angstroms) |           |           |
|------------------|------------------|----------------|-------------------------|-----------|-----------|
|                  |                  |                | X                       | Y         | Z         |
| 1                | 6                | 0              | -2.671502               | 0.805968  | -0.642949 |
| 2                | 6                | 0              | -1.458112               | 1.479700  | -0.560085 |
| 3                | 6                | 0              | -0.532250               | 1.139571  | 0.419057  |
| 4                | 6                | 0              | -0.833286               | 0.116232  | 1.319820  |
| 5                | 6                | 0              | -2.041036               | -0.552353 | 1.243194  |
| 6                | 6                | 0              | -2.968427               | -0.211602 | 0.257474  |
| 7                | 1                | 0              | -3.388930               | 1.073211  | -1.408006 |
| 8                | 1                | 0              | -1.239143               | 2.275657  | -1.263074 |
| 9                | 1                | 0              | -0.107841               | -0.164172 | 2.076470  |
| 10               | 1                | 0              | -2.283572               | -1.346462 | 1.939048  |
| 11               | 6                | 0              | 1.984699                | 0.856666  | 0.367922  |
| 12               | 6                | 0              | 2.101346                | 0.105210  | -0.793749 |
| 13               | 6                | 0              | 2.940542                | 0.696252  | 1.368728  |
| 14               | 6                | 0              | 3.147792                | -0.791946 | -0.966776 |
| 15               | 1                | 0              | 1.363398                | 0.213369  | -1.582225 |
| 16               | 6                | 0              | 3.987024                | -0.196069 | 1.214307  |
| 17               | 1                | 0              | 2.870121                | 1.277208  | 2.283003  |
| 18               | 6                | 0              | 4.097912                | -0.946357 | 0.043268  |
| 19               | 1                | 0              | 3.208725                | -1.360479 | -1.885140 |
| 20               | 1                | 0              | 4.732874                | -0.326741 | 1.988765  |
| 21               | 6                | 0              | 0.963009                | 2.965159  | -0.367608 |
| 22               | 7                | 0              | 1.078258                | 3.850440  | -1.092581 |
| 23               | 8                | 0              | 5.152144                | -1.792518 | -0.020245 |
| 24               | 6                | 0              | 5.318938                | -2.571783 | -1.186012 |
| 25               | 1                | 0              | 6.216523                | -3.165544 | -1.023532 |
| 26               | 1                | 0              | 4.466466                | -3.241696 | -1.344065 |
| 27               | 1                | 0              | 5.458104                | -1.941318 | -2.071137 |
| 28               | 6                | 0              | 0.823759                | 1.828518  | 0.549522  |
| 29               | 1                | 0              | 0.888225                | 2.247021  | 1.559802  |
| 30               | 6                | 0              | -4.253490               | -0.964867 | 0.215212  |
| 31               | 8                | 0              | -4.547054               | -1.850010 | 0.978705  |
| 32               | 8                | 0              | -5.058059               | -0.550643 | -0.772243 |
| 33               | 6                | 0              | -6.312567               | -1.224553 | -0.876920 |
| 34               | 1                | 0              | -6.823271               | -0.763005 | -1.719150 |
| 35               | 1                | 0              | -6.160001               | -2.289733 | -1.057822 |
| 36               | 1                | 0              | -6.891834               | -1.097509 | 0.038988  |

1.7.12. **DAAN-CN/OMe** of S<sub>0</sub> state optimized with U $\omega$ B97X-D/6-311+G(d,p)

| Center<br>Number | Atomic<br>Number | Atomic<br>Type | Coordinates (Angstroms) |           |           |
|------------------|------------------|----------------|-------------------------|-----------|-----------|
|                  |                  |                | X                       | Y         | Z         |
| 1                | 6                | 0              | -2.653138               | -0.763929 | -1.117039 |
| 2                | 6                | 0              | -1.527557               | -0.002286 | -0.859018 |
| 3                | 6                | 0              | -1.426641               | 0.730849  | 0.321916  |
| 4                | 6                | 0              | -2.465726               | 0.691787  | 1.244772  |
| 5                | 6                | 0              | -3.598148               | -0.072216 | 0.996694  |
| 6                | 6                | 0              | -3.693287               | -0.802264 | -0.183918 |
| 7                | 1                | 0              | -2.733136               | -1.333322 | -2.034817 |
| 8                | 1                | 0              | -0.714246               | 0.018320  | -1.575978 |
| 9                | 1                | 0              | -2.395902               | 1.262745  | 2.164441  |
| 10               | 1                | 0              | -4.406191               | -0.104676 | 1.720091  |
| 11               | 6                | 0              | 1.105409                | 0.761436  | 0.445388  |
| 12               | 6                | 0              | 2.045718                | 1.018377  | -0.538233 |
| 13               | 6                | 0              | 1.327945                | -0.303924 | 1.323787  |
| 14               | 6                | 0              | 3.194128                | 0.235909  | -0.658672 |
| 15               | 1                | 0              | 1.900858                | 1.842756  | -1.228236 |
| 16               | 6                | 0              | 2.459462                | -1.084925 | 1.218855  |
| 17               | 1                | 0              | 0.598144                | -0.527770 | 2.095904  |
| 18               | 6                | 0              | 3.404448                | -0.820388 | 0.221192  |
| 19               | 1                | 0              | 3.907099                | 0.468686  | -1.438262 |
| 20               | 1                | 0              | 2.637802                | -1.910137 | 1.897441  |
| 21               | 6                | 0              | -0.193829               | 2.764736  | -0.246275 |
| 22               | 7                | 0              | -0.213428               | 3.697983  | -0.917746 |
| 23               | 8                | 0              | 4.479330                | -1.640876 | 0.197123  |
| 24               | 6                | 0              | 5.468028                | -1.422326 | -0.787633 |
| 25               | 1                | 0              | 6.227291                | -2.184795 | -0.624600 |
| 26               | 1                | 0              | 5.056364                | -1.531809 | -1.797019 |
| 27               | 1                | 0              | 5.922423                | -0.430948 | -0.683144 |
| 28               | 6                | 0              | -4.858659               | -1.597442 | -0.442519 |
| 29               | 7                | 0              | -5.793812               | -2.237012 | -0.648343 |
| 30               | 6                | 0              | -0.179279               | 1.567284  | 0.600456  |
| 31               | 1                | 0              | -0.237701               | 1.927097  | 1.633297  |

1.7.13. **DAAN-NO<sub>2</sub>/OMe** of S<sub>0</sub> state optimized with U $\omega$ B97X-D/6-311+G(d,p)

| Center<br>Number | Atomic<br>Number | Atomic<br>Type | Coordinates (Angstroms) |           |           |
|------------------|------------------|----------------|-------------------------|-----------|-----------|
|                  |                  |                | X                       | Y         | Z         |
| 1                | 6                | 0              | -3.096188               | 0.602167  | -0.765350 |
| 2                | 6                | 0              | -1.936925               | 1.344302  | -0.574935 |
| 3                | 6                | 0              | -1.008648               | 0.966026  | 0.389024  |
| 4                | 6                | 0              | -1.249607               | -0.166889 | 1.169085  |
| 5                | 6                | 0              | -2.401501               | -0.912205 | 0.995782  |
| 6                | 6                | 0              | -3.309075               | -0.512942 | 0.024345  |
| 7                | 1                | 0              | -3.827315               | 0.880434  | -1.512301 |
| 8                | 1                | 0              | -1.763067               | 2.223385  | -1.184667 |
| 9                | 1                | 0              | -0.520069               | -0.475211 | 1.909916  |
| 10               | 1                | 0              | -2.603911               | -1.791078 | 1.592683  |
| 11               | 6                | 0              | 1.519295                | 0.859183  | 0.435548  |
| 12               | 6                | 0              | 1.782173                | 0.278780  | -0.798165 |

|    |   |   |           |           |           |
|----|---|---|-----------|-----------|-----------|
| 13 | 6 | 0 | 2.388239  | 0.606735  | 1.495038  |
| 14 | 6 | 0 | 2.888424  | -0.540091 | -0.984985 |
| 15 | 1 | 0 | 1.116779  | 0.464136  | -1.635493 |
| 16 | 6 | 0 | 3.492456  | -0.210039 | 1.326964  |
| 17 | 1 | 0 | 2.204331  | 1.055769  | 2.466128  |
| 18 | 6 | 0 | 3.750530  | -0.789287 | 0.083814  |
| 19 | 1 | 0 | 3.064725  | -0.973555 | -1.960271 |
| 20 | 1 | 0 | 4.172582  | -0.410608 | 2.145653  |
| 21 | 6 | 0 | 0.378983  | 2.945559  | -0.190546 |
| 22 | 7 | 0 | 0.453154  | 3.888278  | -0.844732 |
| 23 | 8 | 0 | 4.851478  | -1.570641 | 0.012907  |
| 24 | 6 | 0 | 5.170087  | -2.175794 | -1.223462 |
| 25 | 1 | 0 | 6.082109  | -2.744204 | -1.051878 |
| 26 | 1 | 0 | 4.376480  | -2.856347 | -1.550847 |
| 27 | 1 | 0 | 5.352890  | -1.424684 | -1.999590 |
| 28 | 6 | 0 | 0.287842  | 1.735476  | 0.632957  |
| 29 | 1 | 0 | 0.278006  | 2.077585  | 1.673587  |
| 30 | 7 | 0 | -4.537542 | -1.305352 | -0.172833 |
| 31 | 8 | 0 | -5.310548 | -0.940351 | -1.035543 |
| 32 | 8 | 0 | -4.700849 | -2.275507 | 0.540055  |

1.7.14. **DAAN-OMe/diOMe** of S<sub>0</sub> state optimized with U $\omega$ B97X-D/6-311+G(d,p)

| Center<br>Number | Atomic<br>Number | Atomic<br>Type | Coordinates (Angstroms) |           |           |
|------------------|------------------|----------------|-------------------------|-----------|-----------|
|                  |                  |                | X                       | Y         | Z         |
| 1                | 6                | 0              | 2.748719                | -1.216004 | -0.740288 |
| 2                | 6                | 0              | 1.603141                | -0.496745 | -1.066251 |
| 3                | 6                | 0              | 1.403163                | 0.795495  | -0.600539 |
| 4                | 6                | 0              | 2.380237                | 1.367537  | 0.211670  |
| 5                | 6                | 0              | 3.524307                | 0.666419  | 0.546619  |
| 6                | 6                | 0              | 3.717714                | -0.632584 | 0.073127  |
| 7                | 1                | 0              | 2.865755                | -2.221360 | -1.122915 |
| 8                | 1                | 0              | 0.848075                | -0.967611 | -1.687642 |
| 9                | 1                | 0              | 2.244330                | 2.371980  | 0.597125  |
| 10               | 1                | 0              | 4.284118                | 1.105577  | 1.180844  |
| 11               | 6                | 0              | -1.133051               | 0.721998  | -0.822783 |
| 12               | 6                | 0              | -1.534645               | 0.329751  | 0.459199  |
| 13               | 6                | 0              | -1.903289               | 0.317210  | -1.905115 |
| 14               | 6                | 0              | -2.676457               | -0.449081 | 0.643912  |
| 15               | 6                | 0              | -3.039791               | -0.459225 | -1.747435 |
| 16               | 1                | 0              | -1.605172               | 0.618778  | -2.904438 |
| 17               | 6                | 0              | -3.425764               | -0.842472 | -0.466373 |
| 18               | 1                | 0              | -2.974676               | -0.740992 | 1.639565  |
| 19               | 1                | 0              | -3.636462               | -0.771331 | -2.594625 |
| 20               | 6                | 0              | 0.015509                | 2.855206  | -0.379924 |
| 21               | 7                | 0              | -0.078792               | 3.900962  | 0.089048  |
| 22               | 8                | 0              | 4.868049                | -1.241582 | 0.457297  |
| 23               | 8                | 0              | -4.546156               | -1.599259 | -0.383339 |
| 24               | 6                | 0              | 5.114320                | -2.552402 | -0.000360 |
| 25               | 1                | 0              | 5.168024                | -2.591641 | -1.094365 |
| 26               | 1                | 0              | 6.078001                | -2.840843 | 0.416048  |
| 27               | 1                | 0              | 4.346187                | -3.250940 | 0.351039  |
| 28               | 6                | 0              | -4.995196               | -2.009135 | 0.889557  |
| 29               | 1                | 0              | -5.897438               | -2.592702 | 0.715493  |
| 30               | 1                | 0              | -4.252202               | -2.637592 | 1.393711  |
| 31               | 1                | 0              | -5.239592               | -1.149764 | 1.524088  |
| 32               | 6                | 0              | 0.132674                | 1.537883  | -1.018999 |
| 33               | 1                | 0              | 0.211957                | 1.750176  | -2.091558 |
| 34               | 8                | 0              | -0.749372               | 0.755686  | 1.470075  |
| 35               | 6                | 0              | -1.094194               | 0.434671  | 2.799335  |
| 36               | 1                | 0              | -2.074193               | 0.845096  | 3.065895  |
| 37               | 1                | 0              | -1.089330               | -0.649014 | 2.960821  |
| 38               | 1                | 0              | -0.330380               | 0.894476  | 3.423210  |

1.7.15. **DAAN-OMe/triOMe** of S<sub>0</sub> state optimized with U $\omega$ B97X-D/6-311+G(d,p)

| Center<br>Number | Atomic<br>Number | Atomic<br>Type | Coordinates (Angstroms) |           |           |
|------------------|------------------|----------------|-------------------------|-----------|-----------|
|                  |                  |                | X                       | Y         | Z         |
| 1                | 6                | 0              | 3.002681                | 0.900596  | -1.039259 |
| 2                | 6                | 0              | 1.833664                | 1.085187  | -0.308192 |
| 3                | 6                | 0              | 1.544953                | 0.305331  | 0.803637  |
| 4                | 6                | 0              | 2.455888                | -0.678056 | 1.181628  |
| 5                | 6                | 0              | 3.624162                | -0.873926 | 0.465612  |
| 6                | 6                | 0              | 3.905427                | -0.087291 | -0.650840 |
| 7                | 1                | 0              | 3.192700                | 1.529443  | -1.899153 |
| 8                | 1                | 0              | 1.132121                | 1.852891  | -0.619785 |
| 9                | 1                | 0              | 2.249139                | -1.301465 | 2.044419  |
| 10               | 1                | 0              | 4.336130                | -1.637090 | 0.756311  |
| 11               | 6                | 0              | -0.987687               | 0.313533  | 0.677246  |
| 12               | 6                | 0              | -1.320298               | -0.972903 | 0.255257  |
| 13               | 6                | 0              | -1.790823               | 1.376281  | 0.246479  |
| 14               | 6                | 0              | -2.427730               | -1.216565 | -0.561155 |
| 15               | 6                | 0              | -2.896298               | 1.162915  | -0.566884 |
| 16               | 6                | 0              | -3.206670               | -0.136342 | -0.962086 |
| 17               | 1                | 0              | -2.667447               | -2.221718 | -0.870399 |
| 18               | 1                | 0              | -3.532324               | 1.965871  | -0.909507 |
| 19               | 6                | 0              | 0.145993                | -0.166766 | 2.814513  |
| 20               | 7                | 0              | 0.077087                | -0.707172 | 3.827437  |
| 21               | 8                | 0              | 5.073388                | -0.355571 | -1.289897 |
| 22               | 8                | 0              | -4.301508               | -0.252010 | -1.751526 |
| 23               | 6                | 0              | 5.407549                | 0.418309  | -2.419678 |
| 24               | 1                | 0              | 5.506584                | 1.479592  | -2.164009 |
| 25               | 1                | 0              | 6.368140                | 0.043154  | -2.768938 |

|    |   |   |           |           |           |
|----|---|---|-----------|-----------|-----------|
| 26 | 1 | 0 | 4.664701  | 0.305141  | -3.217837 |
| 27 | 6 | 0 | -4.685233 | -1.537330 | -2.189659 |
| 28 | 1 | 0 | -5.576893 | -1.392802 | -2.797127 |
| 29 | 1 | 0 | -3.903587 | -2.001285 | -2.801554 |
| 30 | 1 | 0 | -4.926681 | -2.192036 | -1.344974 |
| 31 | 6 | 0 | 0.234244  | 0.562835  | 1.544139  |
| 32 | 1 | 0 | 0.212634  | 1.620326  | 1.819837  |
| 33 | 8 | 0 | -0.497387 | -1.947482 | 0.693567  |
| 34 | 6 | 0 | -0.776466 | -3.291680 | 0.370723  |
| 35 | 1 | 0 | -1.754533 | -3.598147 | 0.756571  |
| 36 | 1 | 0 | -0.734733 | -3.458123 | -0.711232 |
| 37 | 1 | 0 | 0.000763  | -3.879665 | 0.854931  |
| 38 | 8 | 0 | -1.409886 | 2.609774  | 0.665947  |
| 39 | 6 | 0 | -2.203313 | 3.723629  | 0.311892  |
| 40 | 1 | 0 | -1.725830 | 4.587526  | 0.770842  |
| 41 | 1 | 0 | -2.235008 | 3.860780  | -0.774166 |
| 42 | 1 | 0 | -3.222600 | 3.623586  | 0.698744  |

1.7.16. DAAN-diOMe/diOMe of S<sub>0</sub> state optimized with U<sub>0</sub>B97X-D/6-311+G(d,p)

| Center Number | Atomic Number | Atomic Type | Coordinates (Angstroms) |           |           |
|---------------|---------------|-------------|-------------------------|-----------|-----------|
|               |               |             | X                       | Y         | Z         |
| 1             | 6             | 0           | -2.124333               | 1.887756  | -0.008583 |
| 2             | 6             | 0           | -1.046562               | 1.003899  | -0.071245 |
| 3             | 6             | 0           | -1.219555               | -0.354347 | -0.243323 |
| 4             | 6             | 0           | -2.533281               | -0.841867 | -0.376940 |
| 5             | 6             | 0           | -3.619833               | 0.014405  | -0.312610 |
| 6             | 6             | 0           | -3.412759               | 1.383674  | -0.123450 |
| 7             | 1             | 0           | -1.937107               | 2.943525  | 0.129429  |
| 8             | 1             | 0           | -0.043317               | 1.401940  | 0.017267  |
| 9             | 1             | 0           | -4.637797               | -0.337062 | -0.409045 |
| 10            | 6             | 0           | 1.311076                | -0.727685 | -0.497321 |
| 11            | 6             | 0           | 2.000887                | -0.139679 | 0.568334  |
| 12            | 6             | 0           | 1.924596                | -0.732122 | -1.745506 |
| 13            | 6             | 0           | 3.273255                | 0.405854  | 0.387920  |
| 14            | 6             | 0           | 3.179622                | -0.187097 | -1.952679 |
| 15            | 1             | 0           | 1.402385                | -1.183805 | -2.582883 |
| 16            | 6             | 0           | 3.858959                | 0.379193  | -0.877210 |
| 17            | 1             | 0           | 3.791369                | 0.848703  | 1.225296  |
| 18            | 1             | 0           | 3.650354                | -0.200355 | -2.927112 |
| 19            | 6             | 0           | -0.092810               | -2.291489 | 0.808336  |
| 20            | 7             | 0           | -0.116828               | -3.059628 | 1.663715  |
| 21            | 8             | 0           | -4.541554               | 2.133696  | -0.073339 |
| 22            | 8             | 0           | 5.086741                | 0.884892  | -1.146552 |
| 23            | 6             | 0           | -4.407884               | 3.524770  | 0.120316  |
| 24            | 1             | 0           | -3.848521               | 3.990562  | -0.698756 |
| 25            | 1             | 0           | -5.420332               | 3.924708  | 0.136929  |
| 26            | 1             | 0           | -3.914216               | 3.749731  | 1.072312  |
| 27            | 6             | 0           | 5.830657                | 1.453087  | -0.091570 |
| 28            | 1             | 0           | 6.772728                | 1.778087  | -0.529553 |
| 29            | 1             | 0           | 5.317100                | 2.319858  | 0.340119  |
| 30            | 1             | 0           | 6.034118                | 0.718615  | 0.695914  |
| 31            | 6             | 0           | -0.062627               | -1.346882 | -0.324174 |
| 32            | 1             | 0           | -0.243594               | -1.974568 | -1.203358 |
| 33            | 8             | 0           | 1.350877                | -0.120611 | 1.752266  |
| 34            | 6             | 0           | 2.047461                | 0.245340  | 2.922758  |
| 35            | 1             | 0           | 2.939344                | -0.374621 | 3.061997  |
| 36            | 1             | 0           | 2.331239                | 1.303997  | 2.905939  |
| 37            | 1             | 0           | 1.356416                | 0.071533  | 3.745156  |
| 38            | 8             | 0           | -2.637317               | -2.175634 | -0.581260 |
| 39            | 6             | 0           | -3.919959               | -2.765550 | -0.591356 |
| 40            | 1             | 0           | -3.755413               | -3.836141 | -0.697002 |
| 41            | 1             | 0           | -4.449700               | -2.570138 | 0.346616  |
| 42            | 1             | 0           | -4.518705               | -2.403473 | -1.434365 |

1.7.17. DAAN-diOMe/triOMe of S<sub>0</sub> state optimized with U<sub>0</sub>B97X-D/6-311+G(d,p)

| Center Number | Atomic Number | Atomic Type | Coordinates (Angstroms) |           |           |
|---------------|---------------|-------------|-------------------------|-----------|-----------|
|               |               |             | X                       | Y         | Z         |
| 1             | 6             | 0           | 2.327946                | -1.805695 | -0.730433 |
| 2             | 6             | 0           | 1.225432                | -1.054125 | -0.321227 |
| 3             | 6             | 0           | 1.348081                | 0.240742  | 0.138576  |
| 4             | 6             | 0           | 2.634903                | 0.809810  | 0.175819  |
| 5             | 6             | 0           | 3.745634                | 0.083046  | -0.219931 |
| 6             | 6             | 0           | 3.589670                | -1.230504 | -0.671369 |
| 7             | 1             | 0           | 2.180088                | -2.817483 | -1.081614 |
| 8             | 1             | 0           | 0.241582                | -1.504693 | -0.369315 |
| 9             | 1             | 0           | 4.744115                | 0.497385  | -0.197871 |
| 10            | 6             | 0           | -1.197122               | 0.552907  | 0.176798  |
| 11            | 6             | 0           | -1.838401               | -0.465668 | 0.879814  |
| 12            | 6             | 0           | -1.850781               | 1.084512  | -0.944829 |
| 13            | 6             | 0           | -3.107664               | -0.928632 | 0.518058  |
| 14            | 6             | 0           | -3.106837               | 0.636892  | -1.331798 |
| 15            | 6             | 0           | -3.729137               | -0.364678 | -0.589620 |
| 16            | 1             | 0           | -3.582052               | -1.714531 | 1.084699  |
| 17            | 1             | 0           | -3.630014               | 1.037319  | -2.187732 |
| 18            | 6             | 0           | 0.222791                | 1.387303  | 2.023182  |
| 19            | 7             | 0           | 0.278078                | 1.668488  | 3.137038  |
| 20            | 8             | 0           | 4.739472                | -1.853780 | -1.034034 |
| 21            | 8             | 0           | -4.954359               | -0.735236 | -1.034212 |
| 22            | 6             | 0           | 4.656787                | -3.185085 | -1.492059 |
| 23            | 1             | 0           | 4.046990                | -3.258822 | -2.399639 |
| 24            | 1             | 0           | 5.677238                | -3.489304 | -1.719248 |

|    |   |   |           |           |           |
|----|---|---|-----------|-----------|-----------|
| 25 | 1 | 0 | 4.244540  | -3.847531 | -0.722620 |
| 26 | 6 | 0 | -5.652517 | -1.737325 | -0.327831 |
| 27 | 1 | 0 | -6.601146 | -1.864204 | -0.846505 |
| 28 | 1 | 0 | -5.106844 | -2.687603 | -0.337262 |
| 29 | 1 | 0 | -5.844953 | -1.435947 | 0.707850  |
| 30 | 6 | 0 | 0.160131  | 1.090236  | 0.580940  |
| 31 | 1 | 0 | 0.271540  | 2.064013  | 0.096951  |
| 32 | 8 | 0 | -1.138353 | -0.985544 | 1.910482  |
| 33 | 6 | 0 | -1.786322 | -1.824150 | 2.841653  |
| 34 | 1 | 0 | -2.675358 | -1.339471 | 3.257973  |
| 35 | 1 | 0 | -2.063589 | -2.784150 | 2.391375  |
| 36 | 1 | 0 | -1.063796 | -1.995362 | 3.637179  |
| 37 | 8 | 0 | -1.177211 | 2.054203  | -1.608089 |
| 38 | 6 | 0 | -1.779854 | 2.653286  | -2.735589 |
| 39 | 1 | 0 | -1.068960 | 3.395796  | -3.093557 |
| 40 | 1 | 0 | -1.963818 | 1.917358  | -3.525356 |
| 41 | 1 | 0 | -2.719456 | 3.148506  | -2.468846 |
| 42 | 8 | 0 | 2.689694  | 2.091064  | 0.608036  |
| 43 | 6 | 0 | 3.952014  | 2.695291  | 0.787931  |
| 44 | 1 | 0 | 4.487281  | 2.792513  | -0.163193 |
| 45 | 1 | 0 | 3.754196  | 3.685168  | 1.194865  |
| 46 | 1 | 0 | 4.563415  | 2.126995  | 1.496619  |

1.7.18. DAAN-triOMe/triOMe of S<sub>0</sub> state optimized with U<sub>0</sub>B97X-D/6-311+G(d,p)

| Center Number | Atomic Number | Atomic Type | Coordinates (Angstroms) |           |           |
|---------------|---------------|-------------|-------------------------|-----------|-----------|
|               |               |             | X                       | Y         | Z         |
| 1             | 6             | 0           | 2.506665                | -1.410758 | -0.948652 |
| 2             | 6             | 0           | 1.384195                | -1.141594 | -0.158377 |
| 3             | 6             | 0           | 1.296851                | 0.000944  | 0.633062  |
| 4             | 6             | 0           | 2.396917                | 0.869680  | 0.650030  |
| 5             | 6             | 0           | 3.523698                | 0.627648  | -0.126013 |
| 6             | 6             | 0           | 3.566198                | -0.512084 | -0.924467 |
| 7             | 1             | 0           | 2.544550                | -2.301414 | -1.555854 |
| 8             | 1             | 0           | 4.380625                | 1.285266  | -0.128965 |
| 9             | 6             | 0           | -1.225700               | 0.394030  | 0.625597  |
| 10            | 6             | 0           | -2.255574               | -0.546381 | 0.635709  |
| 11            | 6             | 0           | -1.368459               | 1.496317  | -0.231812 |
| 12            | 6             | 0           | -3.389469               | -0.403212 | -0.174705 |
| 13            | 6             | 0           | -2.476678               | 1.656361  | -1.052356 |
| 14            | 6             | 0           | -3.484466               | 0.697503  | -1.051933 |
| 15            | 1             | 0           | -4.170274               | -0.144677 | -0.144468 |
| 16            | 1             | 0           | -2.594201               | 2.500817  | -1.715543 |
| 17            | 6             | 0           | 0.001615                | -0.514137 | 2.659302  |
| 18            | 7             | 0           | 0.062294                | -1.096020 | 3.649774  |
| 19            | 8             | 0           | 4.702415                | -0.668072 | -1.649341 |
| 20            | 8             | 0           | -4.534936               | 0.926656  | -1.843604 |
| 21            | 6             | 0           | 4.827632                | -1.810642 | -2.465954 |
| 22            | 1             | 0           | 4.048797                | -1.840065 | -3.236522 |
| 23            | 1             | 0           | 5.802187                | -1.732109 | -2.944977 |
| 24            | 1             | 0           | 4.790426                | -2.732040 | -1.873849 |
| 25            | 6             | 0           | -5.599538               | 0.002602  | -1.849756 |
| 26            | 1             | 0           | -6.322503               | 0.381764  | -2.570190 |
| 27            | 1             | 0           | -5.265235               | -0.992529 | -2.164941 |
| 28            | 1             | 0           | -6.075169               | -0.067632 | -0.864931 |
| 29            | 6             | 0           | 0.051819                | 0.323025  | 1.452270  |
| 30            | 1             | 0           | 0.217297                | 1.332503  | 1.837324  |
| 31            | 8             | 0           | -2.097962               | -1.600275 | 1.460091  |
| 32            | 6             | 0           | -3.155146               | -2.506896 | 1.655988  |
| 33            | 1             | 0           | -4.060228               | -1.999715 | 2.008655  |
| 34            | 1             | 0           | -3.383421               | -3.065412 | 0.739937  |
| 35            | 1             | 0           | -2.809501               | -3.198931 | 2.422075  |
| 36            | 8             | 0           | -0.349264               | 2.387401  | -0.191706 |
| 37            | 6             | 0           | -0.380239               | 3.503190  | -1.051656 |
| 38            | 1             | 0           | 0.538900                | 4.053604  | -0.857002 |
| 39            | 1             | 0           | -0.402592               | 3.195244  | -2.102548 |
| 40            | 1             | 0           | -1.240239               | 4.148425  | -0.841253 |
| 41            | 8             | 0           | 2.289658                | 1.941617  | 1.470179  |
| 42            | 6             | 0           | 3.348247                | 2.871145  | 1.518755  |
| 43            | 1             | 0           | 3.526129                | 3.325180  | 0.537485  |
| 44            | 1             | 0           | 3.036971                | 3.641290  | 2.225589  |
| 45            | 1             | 0           | 4.272569                | 2.406210  | 1.878000  |
| 46            | 8             | 0           | 0.316354                | -1.964625 | -0.103256 |
| 47            | 6             | 0           | 0.308916                | -3.149044 | -0.862027 |
| 48            | 1             | 0           | 0.367225                | -2.938919 | -1.936192 |
| 49            | 1             | 0           | 1.127848                | -3.816927 | -0.572203 |
| 50            | 1             | 0           | -0.641249               | -3.633488 | -0.642424 |

1.7.19. DAAN-OMe/diOMe-m of S<sub>0</sub> state optimized with U<sub>0</sub>B97X-D/6-311+G(d,p)

| Center Number | Atomic Number | Atomic Type | Coordinates (Angstroms) |           |           |
|---------------|---------------|-------------|-------------------------|-----------|-----------|
|               |               |             | X                       | Y         | Z         |
| 1             | 6             | 0           | 2.897763                | -0.683213 | 0.938038  |
| 2             | 6             | 0           | 1.731094                | -0.057027 | 0.511083  |
| 3             | 6             | 0           | 1.693007                | 0.654144  | -0.679181 |
| 4             | 6             | 0           | 2.853525                | 0.731219  | -1.449072 |
| 5             | 6             | 0           | 4.020620                | 0.112229  | -1.041167 |
| 6             | 6             | 0           | 4.050546                | -0.599469 | 0.159435  |
| 7             | 1             | 0           | 2.889649                | -1.231466 | 1.870740  |
| 8             | 1             | 0           | 0.835731                | -0.139341 | 1.117808  |
| 9             | 1             | 0           | 2.846364                | 1.286187  | -2.382189 |
| 10            | 1             | 0           | 4.923486                | 0.165663  | -1.637250 |
| 11            | 6             | 0           | -0.851577               | 0.585564  | -0.829879 |

|    |   |   |           |           |           |
|----|---|---|-----------|-----------|-----------|
| 12 | 6 | 0 | -1.726473 | 0.971789  | 0.188262  |
| 13 | 6 | 0 | -1.116853 | -0.564293 | -1.550020 |
| 14 | 6 | 0 | -2.853163 | 0.217711  | 0.483031  |
| 15 | 1 | 0 | -1.523457 | 1.877691  | 0.745111  |
| 16 | 6 | 0 | -2.244650 | -1.332105 | -1.263078 |
| 17 | 1 | 0 | -0.440520 | -0.884660 | -2.335265 |
| 18 | 6 | 0 | -3.117942 | -0.957201 | -0.252764 |
| 19 | 1 | 0 | -2.431641 | -2.226964 | -1.841787 |
| 20 | 6 | 0 | 0.383735  | 2.722698  | -0.578451 |
| 21 | 7 | 0 | 0.360719  | 3.781369  | -0.128787 |
| 22 | 8 | 0 | 5.235375  | -1.174153 | 0.477648  |
| 23 | 8 | 0 | -4.234607 | -1.631848 | 0.098432  |
| 24 | 6 | 0 | 5.327062  | -1.893581 | 1.688372  |
| 25 | 1 | 0 | 4.641223  | -2.748211 | 1.698955  |
| 26 | 1 | 0 | 6.352011  | -2.255652 | 1.745610  |
| 27 | 1 | 0 | 5.122258  | -1.250691 | 2.551706  |
| 28 | 6 | 0 | -4.549486 | -2.807912 | -0.612052 |
| 29 | 1 | 0 | -5.473359 | -3.182762 | -0.175103 |
| 30 | 1 | 0 | -4.710674 | -2.602363 | -1.676611 |
| 31 | 1 | 0 | -3.764573 | -3.565253 | -0.502410 |
| 32 | 6 | 0 | 0.420357  | 1.365357  | -1.138079 |
| 33 | 1 | 0 | 0.482174  | 1.492267  | -2.224263 |
| 34 | 8 | 0 | -3.748947 | 0.524158  | 1.444880  |
| 35 | 6 | 0 | -3.544331 | 1.705374  | 2.190807  |
| 36 | 1 | 0 | -4.378534 | 1.765337  | 2.887345  |
| 37 | 1 | 0 | -2.604773 | 1.666522  | 2.753532  |
| 38 | 1 | 0 | -3.544364 | 2.591162  | 1.546188  |

1.7.20. **DAAN-diOMe-m/diOMe-m** of  $S_0$  state optimized with UoB97X-D/6-311+G(d,p)

| Center Number | Atomic Number | Atomic Type | Coordinates (Angstroms) |           |           | Z |
|---------------|---------------|-------------|-------------------------|-----------|-----------|---|
|               |               |             | X                       | Y         |           |   |
| 1             | 6             | 0           | 2.367411                | -1.495208 | -1.235088 |   |
| 2             | 6             | 0           | 1.282076                | -0.686037 | -1.566393 |   |
| 3             | 6             | 0           | 1.144410                | 0.567005  | -0.998039 |   |
| 4             | 6             | 0           | 2.103895                | 1.013335  | -0.086796 |   |
| 5             | 6             | 0           | 3.188663                | 0.216781  | 0.252407  |   |
| 6             | 6             | 0           | 3.324604                | -1.061018 | -0.329586 |   |
| 7             | 1             | 0           | 2.453432                | -2.471664 | -1.693232 |   |
| 8             | 1             | 0           | 0.534966                | -1.054302 | -2.261213 |   |
| 9             | 1             | 0           | 2.000774                | 1.997278  | 0.352560  |   |
| 10            | 6             | 0           | -1.383410               | 0.750988  | -0.899631 |   |
| 11            | 6             | 0           | -1.523726               | 0.359898  | 0.437038  |   |
| 12            | 6             | 0           | -2.418537               | 0.535365  | -1.783618 |   |
| 13            | 6             | 0           | -2.688436               | -0.237169 | 0.881408  |   |
| 14            | 1             | 0           | -0.698285               | 0.521303  | 1.119077  |   |
| 15            | 6             | 0           | -3.602178               | -0.070600 | -1.348775 |   |
| 16            | 1             | 0           | -2.326414               | 0.835699  | -2.821786 |   |
| 17            | 6             | 0           | -3.750722               | -0.458230 | -0.028788 |   |
| 18            | 1             | 0           | -4.401700               | -0.232054 | -2.059509 |   |
| 19            | 6             | 0           | 0.006452                | 2.769541  | -0.837236 |   |
| 20            | 7             | 0           | 0.075626                | 3.837193  | -0.414420 |   |
| 21            | 8             | 0           | 4.408214                | -1.771092 | 0.054968  |   |
| 22            | 8             | 0           | -4.848414               | -1.049839 | 0.488895  |   |
| 23            | 6             | 0           | 4.594248                | -3.051097 | -0.505308 |   |
| 24            | 1             | 0           | 4.704663                | -2.999924 | -1.594697 |   |
| 25            | 1             | 0           | 5.513745                | -3.437561 | -0.069208 |   |
| 26            | 1             | 0           | 3.765272                | -3.723253 | -0.254914 |   |
| 27            | 6             | 0           | -5.941945               | -1.283207 | -0.369634 |   |
| 28            | 1             | 0           | -6.708273               | -1.754059 | 0.243499  |   |
| 29            | 1             | 0           | -6.333632               | -0.346465 | -0.782509 |   |
| 30            | 1             | 0           | -5.670496               | -1.957439 | -1.190237 |   |
| 31            | 6             | 0           | -0.082581               | 1.400694  | -1.359203 |   |
| 32            | 1             | 0           | -0.122031               | 1.496581  | -2.449291 |   |
| 33            | 8             | 0           | -2.909202               | -0.647161 | 2.147773  |   |
| 34            | 6             | 0           | -1.883062               | -0.446789 | 3.095544  |   |
| 35            | 1             | 0           | -2.264928               | -0.840094 | 4.035866  |   |
| 36            | 1             | 0           | -0.971619               | -0.988746 | 2.818710  |   |
| 37            | 1             | 0           | -1.652051               | 0.617806  | 3.214578  |   |
| 38            | 8             | 0           | 4.158560                | 0.574409  | 1.120874  |   |
| 39            | 6             | 0           | 4.083806                | 1.854982  | 1.710138  |   |
| 40            | 1             | 0           | 3.177393                | 1.965838  | 2.316094  |   |
| 41            | 1             | 0           | 4.958275                | 1.937993  | 2.352905  |   |
| 42            | 1             | 0           | 4.112469                | 2.646777  | 0.953522  |   |

1.8. DAAN radical geometries of  $D_0$  state optimized with UoB97X-D/6-311+G(d,p)

1.8.1. **DAAN-H/H** of  $D_0$  state optimized with UoB97X-D/6-311+G(d,p)

| Center Number | Atomic Number | Atomic Type | Coordinates (Angstroms) |           |           | Z |
|---------------|---------------|-------------|-------------------------|-----------|-----------|---|
|               |               |             | X                       | Y         |           |   |
| 1             | 6             | 0           | 3.673950                | 0.164294  | 0.432697  |   |
| 2             | 6             | 0           | 2.438323                | 0.787755  | 0.468982  |   |
| 3             | 6             | 0           | 1.291623                | 0.142172  | -0.028170 |   |
| 4             | 6             | 0           | 1.440752                | -1.138235 | -0.591323 |   |
| 5             | 6             | 0           | 2.681592                | -1.753111 | -0.629404 |   |
| 6             | 6             | 0           | 3.801929                | -1.110569 | -0.111271 |   |
| 7             | 1             | 0           | 4.543086                | 0.675355  | 0.830488  |   |
| 8             | 1             | 0           | 2.348186                | 1.781853  | 0.892818  |   |
| 9             | 1             | 0           | 0.584468                | -1.633614 | -1.032153 |   |
| 10            | 1             | 0           | 2.777987                | -2.735091 | -1.078393 |   |
| 11            | 6             | 0           | 0.000006                | 0.812586  | 0.000015  |   |
| 12            | 6             | 0           | -1.291621               | 0.142175  | 0.028180  |   |

|    |   |   |           |           |           |
|----|---|---|-----------|-----------|-----------|
| 13 | 6 | 0 | -2.438293 | 0.787736  | -0.469057 |
| 14 | 6 | 0 | -1.440777 | -1.138199 | 0.591395  |
| 15 | 6 | 0 | -3.673924 | 0.164280  | -0.432795 |
| 16 | 1 | 0 | -2.348132 | 1.781812  | -0.892941 |
| 17 | 6 | 0 | -2.681621 | -1.753071 | 0.629455  |
| 18 | 1 | 0 | -0.584513 | -1.633555 | 1.032291  |
| 19 | 6 | 0 | -3.801932 | -1.110553 | 0.111236  |
| 20 | 1 | 0 | -4.543041 | 0.675321  | -0.830654 |
| 21 | 1 | 0 | -2.778039 | -2.735025 | 1.078494  |
| 22 | 6 | 0 | 0.000002  | 2.224785  | 0.000029  |
| 23 | 7 | 0 | -0.000009 | 3.83063   | 0.000040  |
| 24 | 1 | 0 | 4.770874  | -1.595392 | -0.141743 |
| 25 | 1 | 0 | -4.770880 | -1.595370 | 0.141691  |

1.8.2. **DAAN-H/Me** of  $D_0$  state optimized with UoB97X-D/6-311+G(d,p)

| Center Number | Atomic Number | Atomic Type | Coordinates (Angstroms) |           |           | Z |
|---------------|---------------|-------------|-------------------------|-----------|-----------|---|
|               |               |             | X                       | Y         |           |   |
| 1             | 6             | 0           | 4.069077                | -0.185351 | -0.461556 |   |
| 2             | 6             | 0           | 4.052268                | -1.461008 | 0.094929  |   |
| 3             | 6             | 0           | 2.870426                | -1.960590 | 0.633286  |   |
| 4             | 6             | 0           | 1.711027                | -1.202512 | 0.603144  |   |
| 5             | 6             | 0           | 1.707331                | 0.080590  | 0.027582  |   |
| 6             | 6             | 0           | 2.915572                | 0.580180  | -0.490271 |   |
| 7             | 1             | 0           | 4.987448                | 0.215159  | -0.875190 |   |
| 8             | 1             | 0           | 2.855157                | -2.942770 | 1.091914  |   |
| 9             | 1             | 0           | 0.807225                | -1.587976 | 1.058891  |   |
| 10            | 1             | 0           | 2.938631                | 1.573898  | -0.923891 |   |
| 11            | 6             | 0           | 0.502519                | 0.899509  | 0.006826  |   |
| 12            | 6             | 0           | -0.856382               | 0.387284  | -0.013704 |   |
| 13            | 6             | 0           | -1.162137               | -0.877567 | -0.546984 |   |
| 14            | 6             | 0           | -1.924775               | 1.172339  | 0.458014  |   |
| 15            | 6             | 0           | -2.467139               | -1.338295 | -0.576920 |   |
| 16            | 1             | 0           | -0.374059               | -1.484659 | -0.975326 |   |
| 17            | 6             | 0           | -3.222771               | 0.697952  | 0.427675  |   |
| 18            | 1             | 0           | -1.724460               | 2.160774  | 0.856828  |   |
| 19            | 6             | 0           | -3.521250               | -0.568633 | -0.081779 |   |
| 20            | 1             | 0           | -2.674601               | -2.312330 | -1.008443 |   |
| 21            | 1             | 0           | -4.024849               | 1.323650  | 0.805930  |   |
| 22            | 6             | 0           | 0.671856                | 2.301744  | 0.006806  |   |
| 23            | 7             | 0           | 0.811055                | 3.451629  | 0.007017  |   |
| 24            | 1             | 0           | 4.957161                | -2.057203 | 0.119205  |   |
| 25            | 6             | 0           | -4.932657               | -1.088038 | -0.082606 |   |
| 26            | 1             | 0           | -5.074603               | -1.854214 | -0.847424 |   |
| 27            | 1             | 0           | -5.177663               | -1.536248 | 0.885782  |   |
| 28            | 1             | 0           | -5.650571               | -0.285106 | -0.264041 |   |

1.8.3. **DAAN-H/OMe** of  $D_0$  state optimized with UoB97X-D/6-311+G(d,p)

| Center Number | Atomic Number | Atomic Type | Coordinates (Angstroms) |           |           | Z |
|---------------|---------------|-------------|-------------------------|-----------|-----------|---|
|               |               |             | X                       | Y         |           |   |
| 1             | 6             | 0           | -4.460746               | -0.207274 | -0.444297 |   |
| 2             | 6             | 0           | -3.311740               | 0.564975  | -0.484044 |   |
| 3             | 6             | 0           | -2.099102               | 0.077709  | 0.033709  |   |
| 4             | 6             | 0           | -2.092952               | -1.199814 | 0.620304  |   |
| 5             | 6             | 0           | -3.247459               | -1.965285 | 0.660953  |   |
| 6             | 6             | 0           | -4.434322               | -1.477968 | 0.122759  |   |
| 7             | 1             | 0           | -5.383057               | 0.184274  | -0.857861 |   |
| 8             | 1             | 0           | -3.342339               | 1.554879  | -0.925961 |   |
| 9             | 1             | 0           | -1.185496               | -1.575600 | 1.077172  |   |
| 10            | 1             | 0           | -3.224104               | -2.943384 | 1.127983  |   |
| 11            | 6             | 0           | -0.898123               | 0.904778  | 0.001735  |   |
| 12            | 6             | 0           | 0.460165                | 0.402057  | -0.040243 |   |
| 13            | 6             | 0           | 1.533104                | 1.196195  | 0.395938  |   |
| 14            | 6             | 0           | 0.767985                | -0.873199 | -0.562300 |   |
| 15            | 6             | 0           | 2.841571                | 0.742718  | 0.352389  |   |
| 16            | 1             | 0           | 1.335705                | 2.188135  | 0.787245  |   |
| 17            | 6             | 0           | 2.065426                | -1.329421 | -0.614126 |   |
| 18            | 1             | 0           | -0.023441               | -1.493732 | -0.963821 |   |
| 19            | 6             | 0           | 3.116838                | -0.530765 | -0.148480 |   |
| 20            | 1             | 0           | 3.633065                | 1.387662  | 0.710136  |   |
| 21            | 1             | 0           | 2.299480                | -2.302334 | -1.029000 |   |
| 22            | 6             | 0           | -1.077473               | 2.305573  | 0.015890  |   |
| 23            | 7             | 0           | -1.221648               | 3.454982  | 0.028388  |   |
| 24            | 8             | 0           | 4.350466                | -1.070864 | -0.234931 |   |
| 25            | 6             | 0           | 5.455405                | -0.304828 | 0.201809  |   |
| 26            | 1             | 0           | 6.333148                | -0.927439 | 0.040036  |   |
| 27            | 1             | 0           | 5.553775                | 0.618284  | -0.379260 |   |
| 28            | 1             | 0           | 5.374988                | -0.061855 | 1.266744  |   |
| 29            | 1             | 0           | -5.335381               | -2.079561 | 0.155335  |   |

1.8.4. **DAAN-Me/OMe** of  $D_0$  state optimized with UoB97X-D/6-311+G(d,p)

| Center Number | Atomic Number | Atomic Type | Coordinates (Angstroms) |           |           | Z |
|---------------|---------------|-------------|-------------------------|-----------|-----------|---|
|               |               |             | X                       | Y         |           |   |
| 1             | 6             | 0           | -4.072760               | 0.350872  | -0.442657 |   |
| 2             | 6             | 0           | -2.857114               | 1.009330  | -0.476845 |   |
| 3             | 6             | 0           | -1.690424               | 0.399944  | 0.017678  |   |
| 4             | 6             | 0           | -1.812351               | -0.883550 | 0.576675  |   |
| 5             | 6             | 0           | -3.036361               | -1.530629 | 0.609521  |   |

|    |   |   |           |           |           |
|----|---|---|-----------|-----------|-----------|
| 6  | 6 | 0 | -4.187462 | -0.934471 | 0.092618  |
| 7  | 1 | 0 | -4.954482 | 0.844844  | -0.838467 |
| 8  | 1 | 0 | -2.799887 | 2.008207  | -0.895558 |
| 9  | 1 | 0 | -0.947857 | -1.359010 | 1.023982  |
| 10 | 1 | 0 | -3.102402 | -2.515384 | 1.061302  |
| 11 | 6 | 0 | -0.417959 | 1.106717  | -0.005928 |
| 12 | 6 | 0 | 0.887712  | 0.475701  | -0.043982 |
| 13 | 6 | 0 | 2.026716  | 1.154623  | 0.416524  |
| 14 | 6 | 0 | 1.076953  | -0.813425 | -0.586384 |
| 15 | 6 | 0 | 3.286438  | 0.578295  | 0.375678  |
| 16 | 1 | 0 | 1.921276  | 2.154087  | 0.824052  |
| 17 | 6 | 0 | 2.325375  | -1.391700 | -0.635520 |
| 18 | 1 | 0 | 0.233508  | -1.347383 | -1.006274 |
| 19 | 6 | 0 | 3.443544  | -0.706355 | -0.146359 |
| 20 | 1 | 0 | 4.132362  | 1.137967  | 0.752093  |
| 21 | 1 | 0 | 2.469080  | -2.375149 | -1.066429 |
| 22 | 6 | 0 | -0.459565 | 2.518429  | 0.011846  |
| 23 | 7 | 0 | -0.490773 | 3.676400  | 0.027228  |
| 24 | 8 | 0 | 4.621441  | -1.360518 | -0.232793 |
| 25 | 6 | 0 | 5.789078  | -0.710047 | 0.226589  |
| 26 | 1 | 0 | 6.606312  | -1.408987 | 0.059379  |
| 27 | 1 | 0 | 5.978858  | 0.210572  | -0.335580 |
| 28 | 1 | 0 | 5.722276  | -0.480163 | 1.295436  |
| 29 | 6 | 0 | -5.508076 | -1.654824 | 0.097622  |
| 30 | 1 | 0 | -5.676424 | -2.157050 | -0.860562 |
| 31 | 1 | 0 | -5.543906 | -2.415135 | -0.880531 |
| 32 | 1 | 0 | -6.337294 | -0.961539 | 0.255373  |

1.8.5. **DAAN-OMe/OMe** of D<sub>0</sub> state optimized with UωB97X-D/6-311+G(d,p)

| Center Number | Atomic Number | Atomic Type | Coordinates (Angstroms) |           |           |
|---------------|---------------|-------------|-------------------------|-----------|-----------|
|               |               |             | X                       | Y         | Z         |
| 1             | 6             | 0           | 3.689740                | 0.520864  | 0.369442  |
| 2             | 6             | 0           | 2.447147                | 1.133802  | 0.416885  |
| 3             | 6             | 0           | 1.288517                | 0.491827  | -0.045127 |
| 4             | 6             | 0           | 1.438476                | -0.798157 | -0.595981 |
| 5             | 6             | 0           | 2.669331                | -1.413328 | -0.651110 |
| 6             | 6             | 0           | 3.807942                | -0.764453 | -0.160433 |
| 7             | 1             | 0           | 4.552474                | 1.053294  | 0.747253  |
| 8             | 1             | 0           | 2.371871                | 2.133470  | 0.830664  |
| 9             | 1             | 0           | 0.578943                | -1.304342 | -1.018000 |
| 10            | 1             | 0           | 2.782759                | -2.398063 | -1.088157 |
| 11            | 6             | 0           | -1.288526               | 0.491832  | 0.045139  |
| 12            | 6             | 0           | -2.447139               | 1.133792  | -0.416932 |
| 13            | 6             | 0           | -1.438503               | -0.798126 | 0.596042  |
| 14            | 6             | 0           | -3.689735               | 0.520860  | -0.369500 |
| 15            | 1             | 0           | -2.371847               | 2.133444  | -0.830748 |
| 16            | 6             | 0           | -2.669361               | -1.413293 | 0.651163  |
| 17            | 1             | 0           | -0.578983               | -1.304295 | 1.018107  |
| 18            | 6             | 0           | -3.807955               | -0.764435 | 0.160426  |
| 19            | 1             | 0           | -4.552456               | 1.053275  | -0.747359 |
| 20            | 1             | 0           | -2.782805               | -2.398008 | 1.088248  |
| 21            | 6             | 0           | -0.000002               | 2.573121  | 0.000014  |
| 22            | 7             | 0           | 0.000098                | 3.731882  | 0.000026  |
| 23            | 8             | 0           | 4.966336                | -1.453214 | -0.253007 |
| 24            | 8             | 0           | -4.966354               | -1.453191 | 0.252991  |
| 25            | 6             | 0           | 6.152820                | -0.840874 | 0.209476  |
| 26            | 1             | 0           | 6.093569                | -0.615211 | 1.279749  |
| 27            | 1             | 0           | 6.948766                | -1.562984 | 0.037802  |
| 28            | 1             | 0           | 6.370196                | 0.077078  | -0.347196 |
| 29            | 6             | 0           | -6.152830               | -0.840848 | -0.209507 |
| 30            | 1             | 0           | -6.948787               | -1.562939 | -0.037804 |
| 31            | 1             | 0           | -6.370189               | 0.077127  | 0.347134  |
| 32            | 1             | 0           | -6.093581               | -0.615223 | -1.279789 |
| 33            | 6             | 0           | -0.000000               | 1.160989  | 0.000010  |

1.8.6. **DAAN-SMe/OMe** of D<sub>0</sub> state optimized with UωB97X-D/6-311+G(d,p)

| Center Number | Atomic Number | Atomic Type | Coordinates (Angstroms) |           |           |
|---------------|---------------|-------------|-------------------------|-----------|-----------|
|               |               |             | X                       | Y         | Z         |
| 1             | 6             | 0           | 3.317026                | 0.729777  | 0.350472  |
| 2             | 6             | 0           | 2.056966                | 1.301250  | 0.391475  |
| 3             | 6             | 0           | 0.919026                | 0.604902  | -0.048240 |
| 4             | 6             | 0           | 1.114029                | -0.690464 | -0.567660 |
| 5             | 6             | 0           | 2.369107                | -1.260024 | -0.614471 |
| 6             | 6             | 0           | 3.491438                | -0.563621 | -0.146072 |
| 7             | 1             | 0           | 4.159370                | 1.304891  | 0.712118  |
| 8             | 1             | 0           | 1.947881                | 2.307555  | 0.780998  |
| 9             | 1             | 0           | 0.273254                | -1.238923 | -0.974139 |
| 10            | 1             | 0           | 2.489162                | -2.253176 | -1.033891 |
| 11            | 6             | 0           | -1.656093               | 0.513276  | 0.042844  |
| 12            | 6             | 0           | -2.834279               | 1.106893  | -0.434073 |
| 13            | 6             | 0           | -1.763474               | -0.770470 | 0.617764  |
| 14            | 6             | 0           | -4.055213               | 0.452846  | -0.379135 |
| 15            | 1             | 0           | -2.791784               | 2.100783  | -0.865979 |
| 16            | 6             | 0           | -2.972709               | -1.426072 | 0.680934  |
| 17            | 1             | 0           | -0.888858               | -1.238587 | 1.052521  |
| 18            | 6             | 0           | -4.131137               | -0.825800 | 0.174464  |
| 19            | 1             | 0           | -4.934162               | 0.948326  | -0.769459 |
| 20            | 1             | 0           | -3.054262               | -2.405496 | 1.136547  |
| 21            | 6             | 0           | -0.442225               | 2.638214  | -0.029467 |
| 22            | 7             | 0           | -0.448453               | 3.795815  | -0.045948 |
| 23            | 8             | 0           | -5.265034               | -1.551717 | 0.276772  |

|    |    |   |           |           |           |
|----|----|---|-----------|-----------|-----------|
| 24 | 6  | 0 | 6.213428  | -0.183100 | 0.399219  |
| 25 | 1  | 0 | 5.998893  | 0.067825  | 1.438863  |
| 26 | 1  | 0 | 7.191090  | -0.662818 | 0.348415  |
| 27 | 1  | 0 | 6.231340  | 0.717546  | -0.215904 |
| 28 | 6  | 0 | -6.470756 | -0.990093 | -0.200975 |
| 29 | 1  | 0 | -7.241304 | -1.736637 | -0.018597 |
| 30 | 1  | 0 | -6.722321 | -0.070457 | 0.338138  |
| 31 | 1  | 0 | -6.415011 | -0.782238 | -1.274965 |
| 32 | 6  | 0 | -0.391726 | 1.226544  | -0.010666 |
| 33 | 16 | 0 | 5.043156  | -1.399994 | -0.244105 |

1.8.7. **DAAN-F/F** of D<sub>0</sub> state optimized with UωB97X-D/6-311+G(d,p)

| Center Number | Atomic Number | Atomic Type | Coordinates (Angstroms) |           |           |
|---------------|---------------|-------------|-------------------------|-----------|-----------|
|               |               |             | X                       | Y         | Z         |
| 1             | 6             | 0           | -3.671474               | 0.404338  | -0.476670 |
| 2             | 6             | 0           | -2.433216               | 1.020494  | -0.495468 |
| 3             | 6             | 0           | -1.290329               | 0.376357  | 0.013321  |
| 4             | 6             | 0           | -1.446309               | -0.904356 | 0.574209  |
| 5             | 6             | 0           | -2.681931               | -1.527600 | 0.601974  |
| 6             | 6             | 0           | -3.774165               | -0.865148 | 0.067547  |
| 7             | 1             | 0           | -4.551604               | 0.892137  | -0.876114 |
| 8             | 1             | 0           | -2.342007               | 2.014820  | -0.917779 |
| 9             | 1             | 0           | -0.596954               | -1.401126 | 1.026196  |
| 10            | 1             | 0           | -2.810666               | -2.507383 | 1.044419  |
| 11            | 6             | 0           | 1.290404                | 0.376427  | -0.013350 |
| 12            | 6             | 0           | 2.433256                | 1.020584  | 0.495491  |
| 13            | 6             | 0           | 1.446447                | -0.904242 | -0.574322 |
| 14            | 6             | 0           | 3.671543                | 0.404486  | 0.476663  |
| 15            | 1             | 0           | 2.341999                | 2.014879  | 0.917862  |
| 16            | 6             | 0           | 2.682098                | -1.527426 | -0.602119 |
| 17            | 1             | 0           | 0.597118                | -1.401020 | -1.026348 |
| 18            | 6             | 0           | 3.774297                | -0.864959 | -0.067638 |
| 19            | 1             | 0           | 4.551647                | 0.892299  | 0.876146  |
| 20            | 1             | 0           | 2.810882                | -2.507173 | -1.044628 |
| 21            | 6             | 0           | -0.000007               | 2.459260  | 0.000036  |
| 22            | 7             | 0           | -0.000810               | 3.617611  | 0.000471  |
| 23            | 6             | 0           | 0.000020                | 1.047800  | -0.000000 |
| 24            | 9             | 0           | -4.972073               | -1.467722 | 0.088800  |
| 25            | 9             | 0           | 4.972233                | -1.467476 | -0.088923 |

1.8.8. **DAAN-F/OMe** of D<sub>0</sub> state optimized with UωB97X-D/6-311+G(d,p)

| Center Number | Atomic Number | Atomic Type | Coordinates (Angstroms) |           |           |
|---------------|---------------|-------------|-------------------------|-----------|-----------|
|               |               |             | X                       | Y         | Z         |
| 1             | 6             | 0           | 4.097907                | 0.291738  | -0.476435 |
| 2             | 6             | 0           | 2.884556                | 0.956870  | -0.500347 |
| 3             | 6             | 0           | 1.718732                | 0.366148  | 0.018136  |
| 4             | 6             | 0           | 1.824512                | -0.912068 | 0.593722  |
| 5             | 6             | 0           | 3.034330                | -1.585191 | 0.626017  |
| 6             | 6             | 0           | 4.150843                | -0.974137 | 0.081947  |
| 7             | 1             | 0           | 4.995917                | 0.739422  | -0.883125 |
| 8             | 1             | 0           | 2.832327                | 1.949316  | -0.933662 |
| 9             | 1             | 0           | 0.956182                | -1.368400 | 1.052382  |
| 10            | 1             | 0           | 3.123927                | -2.564465 | 1.079266  |
| 11            | 6             | 0           | -0.857690               | 0.473801  | -0.041074 |
| 12            | 6             | 0           | -1.991246               | 1.169588  | 0.409434  |
| 13            | 6             | 0           | -1.059543               | -0.817251 | -0.575777 |
| 14            | 6             | 0           | -3.256802               | 0.607605  | 0.366864  |
| 15            | 1             | 0           | -1.875988               | 2.170354  | 0.811037  |
| 16            | 6             | 0           | -2.313969               | -1.381080 | -0.626609 |
| 17            | 1             | 0           | -0.221435               | -1.364243 | -0.989726 |
| 18            | 6             | 0           | -3.426577               | -0.679093 | -0.147269 |
| 19            | 1             | 0           | -4.097900               | 1.179441  | 0.735525  |
| 20            | 1             | 0           | -2.467438               | -2.365494 | -1.051811 |
| 21            | 6             | 0           | 0.515620                | 2.499945  | 0.024461  |
| 22            | 7             | 0           | 0.567742                | 3.657142  | 0.044038  |
| 23            | 8             | 0           | -4.610292               | -1.320029 | -0.234576 |
| 24            | 6             | 0           | -5.774187               | -0.654581 | 0.214604  |
| 25            | 1             | 0           | -6.597086               | -1.346718 | 0.047533  |
| 26            | 1             | 0           | -5.710311               | -0.418695 | 1.282204  |
| 27            | 1             | 0           | -5.951527               | 0.263855  | -0.354931 |
| 28            | 6             | 0           | 0.453127                | 1.089654  | -0.000466 |
| 29            | 9             | 0           | 5.324867                | -1.625091 | 0.107822  |

1.8.9. **DAAN-Br/OMe** of D<sub>0</sub> state optimized with UωB97X-D/6-311+G(d,p)

| Center Number | Atomic Number | Atomic Type | Coordinates (Angstroms) |           |           |
|---------------|---------------|-------------|-------------------------|-----------|-----------|
|               |               |             | X                       | Y         | Z         |
| 1             | 6             | 0           | -2.944242               | 1.068054  | -0.492269 |
| 2             | 6             | 0           | -1.650098               | 1.558053  | -0.502450 |
| 3             | 6             | 0           | -0.579167               | 0.799184  | 0.000356  |
| 4             | 6             | 0           | -0.866449               | -0.463299 | 0.547066  |
| 5             | 6             | 0           | -2.159348               | -0.958829 | 0.565080  |
| 6             | 6             | 0           | -3.192337               | -0.193745 | 0.036364  |
| 7             | 1             | 0           | -3.755317               | 1.662224  | -0.893689 |
| 8             | 1             | 0           | -1.460832               | 2.543095  | -0.914224 |
| 9             | 1             | 0           | -0.073706               | -1.048736 | 0.996084  |
| 10            | 1             | 0           | -2.365159               | -1.928411 | 1.000746  |
| 11            | 6             | 0           | 1.986768                | 0.544460  | -0.043718 |

|    |    |   |           |           |           |
|----|----|---|-----------|-----------|-----------|
| 12 | 6  | 0 | 3.201557  | 1.070827  | 0.424540  |
| 13 | 6  | 0 | 2.012158  | -0.755635 | -0.593923 |
| 14 | 6  | 0 | 4.376903  | 0.338842  | 0.384986  |
| 15 | 1  | 0 | 3.222746  | 2.073235  | 0.837778  |
| 16 | 6  | 0 | 3.176342  | -1.487721 | -0.642155 |
| 17 | 1  | 0 | 1.110225  | -1.175556 | -1.021875 |
| 18 | 6  | 0 | 4.370965  | -0.953131 | -0.144088 |
| 19 | 1  | 0 | 5.285621  | 0.783734  | 0.767852  |
| 20 | 1  | 0 | 3.195774  | -2.478705 | -1.079100 |
| 21 | 6  | 0 | 0.910437  | 2.742313  | 0.031502  |
| 22 | 7  | 0 | 1.022342  | 3.894772  | 0.062293  |
| 23 | 8  | 0 | 5.454268  | -1.751495 | -0.229569 |
| 24 | 6  | 0 | 6.695080  | -1.261266 | 0.239296  |
| 25 | 1  | 0 | 7.414163  | -2.060717 | 0.072401  |
| 26 | 1  | 0 | 7.006551  | -0.371295 | -0.317657 |
| 27 | 1  | 0 | 6.652349  | -1.029789 | 1.308866  |
| 28 | 6  | 0 | 0.774462  | 1.336894  | -0.005517 |
| 29 | 35 | 0 | -4.962890 | -0.872301 | 0.051797  |

1.8.10. **DAAN-Ac/OMe** of D<sub>0</sub> state optimized with UωB97X-D/6-311+G(d,p)

| Center Number | Atomic Number | Atomic Type | Coordinates (Angstroms) |           |           |
|---------------|---------------|-------------|-------------------------|-----------|-----------|
|               |               |             | X                       | Y         | Z         |
| 1             | 6             | 0           | -3.383236               | 0.852051  | 0.417282  |
| 2             | 6             | 0           | -2.113986               | 1.401247  | 0.430173  |
| 3             | 6             | 0           | -1.006924               | 0.668216  | -0.032294 |
| 4             | 6             | 0           | -1.234555               | -0.626078 | -0.539516 |
| 5             | 6             | 0           | -2.504979               | -1.165726 | -0.553080 |
| 6             | 6             | 0           | -3.596802               | -0.440893 | -0.067031 |
| 7             | 1             | 0           | -4.210424               | 1.443233  | 0.792015  |
| 8             | 1             | 0           | -1.968008               | 2.406199  | 0.809884  |
| 9             | 1             | 0           | -0.411105               | -1.190237 | -0.959405 |
| 10            | 1             | 0           | -2.681009               | -2.156959 | -0.953766 |
| 11            | 6             | 0           | 1.567374                | 0.524395  | 0.034421  |
| 12            | 6             | 0           | 2.759049                | 1.094620  | -0.442190 |
| 13            | 6             | 0           | 1.649040                | -0.759719 | 0.616122  |
| 14            | 6             | 0           | 3.965997                | 0.417988  | -0.382291 |
| 15            | 1             | 0           | 2.736449                | 2.086780  | -0.879345 |
| 16            | 6             | 0           | 2.844938                | -1.436372 | 0.685503  |
| 17            | 1             | 0           | 0.765532                | -1.210319 | 1.050854  |
| 18            | 6             | 0           | 4.016151                | -0.859996 | 0.177965  |
| 19            | 1             | 0           | 4.855038                | 0.894168  | -0.773473 |
| 20            | 1             | 0           | 2.907564                | -2.414874 | 1.145818  |
| 21            | 6             | 0           | 0.398395                | 2.671140  | -0.089223 |
| 22            | 7             | 0           | 0.462939                | 3.826164  | -0.141808 |
| 23            | 8             | 0           | 5.133596                | -1.605751 | 0.286246  |
| 24            | 6             | 0           | 6.353391                | -1.072353 | -0.191344 |
| 25            | 1             | 0           | 7.106521                | -1.834569 | -0.002158 |
| 26            | 1             | 0           | 6.304455                | -0.870116 | -1.266495 |
| 27            | 1             | 0           | 6.622357                | -0.155722 | 0.344013  |
| 28            | 6             | 0           | 0.321399                | 1.261027  | -0.026381 |
| 29            | 6             | 0           | -4.952651               | -1.079381 | -0.101466 |
| 30            | 8             | 0           | -5.088434               | -2.207295 | -0.521196 |
| 31            | 6             | 0           | -6.138489               | -0.285715 | 0.396915  |
| 32            | 1             | 0           | -6.001417               | -0.003911 | 1.444700  |
| 33            | 1             | 0           | -6.256951               | 0.635187  | -0.180876 |
| 34            | 1             | 0           | -7.035529               | -0.894354 | 0.299102  |

1.8.11. **DAAN-COOMe/OMe** of D<sub>0</sub> state optimized with UωB97X-D/6-311+G(d,p)

| Center Number | Atomic Number | Atomic Type | Coordinates (Angstroms) |           |           |
|---------------|---------------|-------------|-------------------------|-----------|-----------|
|               |               |             | X                       | Y         | Z         |
| 1             | 6             | 0           | 2.970132                | 0.979585  | -0.397383 |
| 2             | 6             | 0           | 1.686682                | 1.492199  | -0.420228 |
| 3             | 6             | 0           | 0.598197                | 0.738077  | 0.054590  |
| 4             | 6             | 0           | 0.856022                | -0.539113 | 0.586364  |
| 5             | 6             | 0           | 2.141161                | -1.046376 | 0.612603  |
| 6             | 6             | 0           | 3.207056                | -0.297737 | 0.113260  |
| 7             | 1             | 0           | 3.796165                | 1.566903  | -0.776913 |
| 8             | 1             | 0           | 1.513799                | 2.485596  | -0.818556 |
| 9             | 1             | 0           | 0.046813                | -1.116697 | 1.015171  |
| 10            | 1             | 0           | 2.341024                | -2.025038 | 1.032185  |
| 11            | 6             | 0           | -1.970901               | 0.523972  | -0.031789 |
| 12            | 6             | 0           | -3.184019               | 1.066722  | 0.422552  |
| 13            | 6             | 0           | -2.009821               | -0.769130 | -0.598049 |
| 14            | 6             | 0           | -4.371079               | 0.356365  | 0.355374  |
| 15            | 1             | 0           | -3.194409               | 2.064407  | 0.847401  |
| 16            | 6             | 0           | -3.185727               | -1.479285 | -0.674331 |
| 17            | 1             | 0           | -1.108417               | -1.200499 | -1.015294 |
| 18            | 6             | 0           | -4.378939               | -0.929105 | -0.189596 |
| 19            | 1             | 0           | -5.278042               | 0.812562  | 0.728933  |
| 20            | 1             | 0           | -3.215389               | -2.464693 | -1.123081 |
| 21            | 6             | 0           | -0.862633               | 2.702910  | 0.085124  |
| 22            | 7             | 0           | -0.961454               | 3.855883  | 0.129512  |
| 23            | 8             | 0           | -5.474447               | -1.706354 | -0.303307 |
| 24            | 6             | 0           | -6.714372               | -1.199732 | 0.150594  |
| 25            | 1             | 0           | -7.444551               | -1.983840 | -0.039229 |
| 26            | 1             | 0           | -6.686042               | -0.982956 | 1.223673  |
| 27            | 1             | 0           | -6.999875               | -0.297162 | -0.399923 |
| 28            | 6             | 0           | -0.746573               | 1.295274  | 0.034265  |
| 29            | 6             | 0           | 4.568818                | -0.897569 | 0.162414  |
| 30            | 8             | 0           | 4.811561                | -1.996334 | 0.594925  |
| 31            | 8             | 0           | 5.506702                | -0.078466 | -0.330736 |

|    |   |   |          |           |           |
|----|---|---|----------|-----------|-----------|
| 32 | 6 | 0 | 6.842702 | -0.582510 | -0.317429 |
| 33 | 1 | 0 | 7.456910 | 0.205250  | -0.747925 |
| 34 | 1 | 0 | 7.158394 | -0.799796 | 0.704172  |
| 35 | 1 | 0 | 6.913031 | -1.493251 | -0.914262 |

1.8.12. **DAAN-CN/OMe** of D<sub>0</sub> state optimized with UωB97X-D/6-311+G(d,p)

| Center Number | Atomic Number | Atomic Type | Coordinates (Angstroms) |           |            |
|---------------|---------------|-------------|-------------------------|-----------|------------|
|               |               |             | X                       | Y         | Z          |
| 1             | 6             | 0           | 3.837112                | 0.620210  | -0.462794  |
| 2             | 6             | 0           | 2.590391                | 1.213432  | -0.482616  |
| 3             | 6             | 0           | 1.458420                | 0.539161  | 0.011445   |
| 4             | 6             | 0           | 1.635839                | -0.744056 | 0.560762   |
| 5             | 6             | 0           | 2.882459                | -1.338893 | 0.587605   |
| 6             | 6             | 0           | 3.990768                | -0.664850 | 0.066680   |
| 7             | 1             | 0           | 4.698075                | 1.145527  | -0.857456  |
| 8             | 1             | 0           | 2.481004                | 2.210383  | -0.893820  |
| 9             | 1             | 0           | 0.793871                | -1.260625 | 1.003610   |
| 10            | 1             | 0           | 3.008506                | -2.322269 | -0.102384  |
| 11            | 6             | 0           | -1.118267               | 0.491307  | -0.043672  |
| 12            | 6             | 0           | -2.286697               | 1.118366  | 0.420113   |
| 13            | 6             | 0           | -1.249185               | -0.804177 | -0.591009  |
| 14            | 6             | 0           | -3.517563               | 0.485574  | 0.381161   |
| 15            | 1             | 0           | -2.225762               | 2.120365  | 0.830306   |
| 16            | 6             | 0           | -2.469161               | -1.437498 | -0.639662  |
| 17            | 1             | 0           | -0.385037               | -1.298015 | -0.107791  |
| 18            | 6             | 0           | -3.616806               | -0.804478 | -0.144683  |
| 19            | 1             | 0           | -4.387473               | 1.004235  | 0.761157   |
| 20            | 1             | 0           | -2.570156               | -2.424194 | -0.1074889 |
| 21            | 6             | 0           | 0.132167                | 2.595394  | 0.020869   |
| 22            | 7             | 0           | 0.114896                | 3.752892  | 0.044063   |
| 23            | 8             | 0           | -4.760413               | -1.510056 | -0.230444  |
| 24            | 6             | 0           | -5.959371               | -0.919070 | 0.233904   |
| 25            | 1             | 0           | -6.740246               | -1.657730 | 0.065529   |
| 26            | 1             | 0           | -5.900655               | -0.690631 | 1.303186   |
| 27            | 1             | 0           | -6.194686               | -0.007886 | -0.325766  |
| 28            | 6             | 0           | 0.153187                | 1.182460  | -0.005920  |
| 29            | 6             | 0           | 5.281569                | -1.284713 | 0.087428   |
| 30            | 7             | 0           | 6.318918                | -1.785425 | 0.102816   |

1.8.13. **DAAN-NO<sub>2</sub>/OMe** of D<sub>0</sub> state optimized with UωB97X-D/6-311+G(d,p)

| Center Number | Atomic Number | Atomic Type | Coordinates (Angstroms) |           |           |
|---------------|---------------|-------------|-------------------------|-----------|-----------|
|               |               |             | X                       | Y         | Z         |
| 1             | 6             | 0           | 3.418548                | 0.862423  | -0.458776 |
| 2             | 6             | 0           | 2.147624                | 1.404137  | -0.462541 |
| 3             | 6             | 0           | 1.046184                | 0.673821  | 0.021387  |
| 4             | 6             | 0           | 1.274313                | -0.612835 | 0.544066  |
| 5             | 6             | 0           | 2.543258                | -1.160543 | 0.556027  |
| 6             | 6             | 0           | 3.598456                | -0.418899 | 0.043973  |
| 7             | 1             | 0           | 4.267174                | 1.414010  | -0.840004 |
| 8             | 1             | 0           | 1.996897                | 2.403944  | -0.852682 |
| 9             | 1             | 0           | 0.454901                | -1.170283 | 0.979137  |
| 10            | 1             | 0           | 2.727731                | -2.143807 | 0.966981  |
| 11            | 6             | 0           | -1.526687               | 0.527484  | -0.034151 |
| 12            | 6             | 0           | -2.720217               | 1.101634  | 0.435801  |
| 13            | 6             | 0           | -1.606741               | -0.762162 | -0.605719 |
| 14            | 6             | 0           | -3.925745               | 0.423719  | 0.380466  |
| 15            | 1             | 0           | -2.698867               | 2.097527  | 0.864342  |
| 16            | 6             | 0           | -2.801515               | -1.439826 | -0.670862 |
| 17            | 1             | 0           | -0.723492               | -1.215563 | -1.038210 |
| 18            | 6             | 0           | -3.974207               | -0.859718 | -0.168948 |
| 19            | 1             | 0           | -4.815823               | 0.902194  | 0.766317  |
| 20            | 1             | 0           | -2.863648               | -2.421536 | -1.124211 |
| 21            | 6             | 0           | -0.359020               | 2.675666  | 0.088280  |
| 22            | 7             | 0           | -0.420814               | 3.830354  | 0.144665  |
| 23            | 8             | 0           | -5.089143               | -1.606386 | -0.271807 |
| 24            | 6             | 0           | -6.311975               | -1.071164 | 0.198765  |
| 25            | 1             | 0           | -7.062536               | -1.836859 | 0.014330  |
| 26            | 1             | 0           | -6.265154               | -0.860012 | 1.272108  |
| 27            | 1             | 0           | -6.581081               | -0.160150 | -0.345625 |
| 28            | 6             | 0           | -0.284039               | 1.265616  | 0.022059  |
| 29            | 7             | 0           | 4.949818                | -1.002047 | 0.049558  |
| 30            | 8             | 0           | 5.858173                | -0.322405 | -0.385794 |
| 31            | 8             | 0           | 5.074901                | -2.129174 | 0.487476  |

1.8.14. **DAAN-OMe/diOMe** of D<sub>0</sub> state optimized with UωB97X-D/6-311+G(d,p)

| Center Number | Atomic Number | Atomic Type | Coordinates (Angstroms) |           |           |
|---------------|---------------|-------------|-------------------------|-----------|-----------|
|               |               |             | X                       | Y         | Z         |
| 1             | 6             | 0           | -3.987291               | 0.474789  | -0.371002 |
| 2             | 6             | 0           | -2.724999               | 1.000012  | -0.595691 |
| 3             | 6             | 0           | -1.561639               | 0.346765  | -0.152614 |
| 4             | 6             | 0           | -1.730965               | -0.863698 | 0.557000  |
| 5             | 6             | 0           | -2.981672               | -1.390277 | 0.785632  |
| 6             | 6             | 0           | -4.124907               | -0.730853 | 0.318578  |
| 7             | 1             | 0           | -4.851644               | 1.012163  | -0.738184 |
| 8             | 1             | 0           | -2.635568               | 1.937425  | -1.133239 |
| 9             | 1             | 0           | -0.863459               | -1.375962 | 0.954602  |
| 10            | 1             | 0           | -3.106791               | -2.312267 | 1.340581  |

|    |   |   |           |           |           |
|----|---|---|-----------|-----------|-----------|
| 11 | 6 | 0 | 0.984538  | 0.135656  | -0.309045 |
| 12 | 6 | 0 | 2.161798  | 0.665769  | 0.254804  |
| 13 | 6 | 0 | 1.055824  | -1.156290 | -0.850916 |
| 14 | 6 | 0 | 3.349872  | -0.065393 | 0.262301  |
| 15 | 6 | 0 | 2.220457  | -1.894670 | -0.846732 |
| 16 | 1 | 0 | 0.169297  | -1.571745 | -1.315853 |
| 17 | 6 | 0 | 3.375799  | -1.345698 | -0.288710 |
| 18 | 1 | 0 | 4.237644  | 0.358434  | 0.706738  |
| 19 | 1 | 0 | 2.265553  | -2.883592 | -1.284248 |
| 20 | 6 | 0 | -0.179316 | 2.271451  | -0.762496 |
| 21 | 7 | 0 | -0.162290 | 3.377371  | -1.106525 |
| 22 | 8 | 0 | -5.305394 | -1.330239 | 0.590156  |
| 23 | 8 | 0 | 4.479884  | -2.125294 | -0.324318 |
| 24 | 6 | 0 | -6.494388 | -0.701468 | 0.158166  |
| 25 | 1 | 0 | -6.521182 | -0.606097 | -0.932785 |
| 26 | 1 | 0 | -7.309119 | -1.345972 | 0.482852  |
| 27 | 1 | 0 | -6.610676 | 0.287334  | 0.614956  |
| 28 | 6 | 0 | 5.686047  | -1.620294 | 0.207140  |
| 29 | 1 | 0 | 6.427975  | -2.403440 | 0.062748  |
| 30 | 1 | 0 | 6.007953  | -0.716377 | -0.321790 |
| 31 | 1 | 0 | 5.592586  | -1.405883 | 1.277654  |
| 32 | 6 | 0 | -0.251594 | 0.913719  | -0.379006 |
| 33 | 8 | 0 | 2.051138  | 1.890334  | 0.804349  |
| 34 | 6 | 0 | 3.209564  | 2.565476  | 1.243628  |
| 35 | 1 | 0 | 3.668798  | 2.056517  | 2.098619  |
| 36 | 1 | 0 | 3.941018  | 2.664870  | 0.434688  |
| 37 | 1 | 0 | 2.875859  | 3.554598  | 1.550621  |

|    |   |   |           |           |           |
|----|---|---|-----------|-----------|-----------|
| 16 | 6 | 0 | 3.672245  | -1.299461 | -0.556276 |
| 17 | 1 | 0 | 4.588988  | 0.262095  | 0.609180  |
| 18 | 1 | 0 | 2.499004  | -2.711916 | -1.660537 |
| 19 | 6 | 0 | 0.000030  | 2.229123  | -0.000384 |
| 20 | 7 | 0 | 0.000163  | 3.387480  | -0.000422 |
| 21 | 8 | 0 | -4.782854 | -2.028325 | 0.810440  |
| 22 | 8 | 0 | 4.783119  | -2.027962 | -0.810446 |
| 23 | 6 | 0 | -6.023494 | -1.568597 | 0.319566  |
| 24 | 1 | 0 | -6.028227 | -1.522153 | -0.775255 |
| 25 | 1 | 0 | -6.764108 | -2.294670 | 0.649827  |
| 26 | 1 | 0 | -6.275391 | -0.584196 | 0.729519  |
| 27 | 6 | 0 | 6.023616  | -1.568309 | -0.319142 |
| 28 | 1 | 0 | 6.764348  | -2.294248 | -0.649431 |
| 29 | 1 | 0 | 6.275560  | -0.583778 | -0.728753 |
| 30 | 1 | 0 | 6.028083  | -1.522175 | 0.775693  |
| 31 | 6 | 0 | -0.000025 | 0.816965  | -0.000235 |
| 32 | 8 | 0 | -2.400375 | 1.681220  | -1.146707 |
| 33 | 8 | 0 | 2.399967  | 1.680931  | 1.147143  |
| 34 | 6 | 0 | -3.581550 | 2.324396  | -1.570362 |
| 35 | 1 | 0 | -4.136391 | 1.710298  | -2.288986 |
| 36 | 1 | 0 | -4.225415 | 2.571139  | -0.719466 |
| 37 | 1 | 0 | -3.258237 | 3.243233  | -2.055435 |
| 38 | 6 | 0 | 3.581012  | 2.324096  | 1.571180  |
| 39 | 1 | 0 | 4.135760  | 1.709872  | 2.289767  |
| 40 | 1 | 0 | 4.225022  | 2.571087  | 0.720466  |
| 41 | 1 | 0 | 3.257541  | 3.242797  | 2.056405  |

1.8.15. **DAAN-OMe/triOMe** of D<sub>0</sub> state optimized with UoB97X-D/6-311+G(d,p)

| Center Number | Atomic Number | Atomic Type | Coordinates (Angstroms) |           |           |
|---------------|---------------|-------------|-------------------------|-----------|-----------|
|               |               |             | X                       | Y         | Z         |
| 1             | 6             | 0           | -4.009491               | 0.592239  | 0.249950  |
| 2             | 6             | 0           | -2.774671               | 1.024746  | 0.705379  |
| 3             | 6             | 0           | -1.574255               | 0.477295  | 0.217534  |
| 4             | 6             | 0           | -1.673469               | -0.528229 | -0.771349 |
| 5             | 6             | 0           | -2.894887               | -0.960333 | -1.229441 |
| 6             | 6             | 0           | -4.078407               | -0.408268 | -0.720858 |
| 7             | 1             | 0           | -4.906072               | 1.040029  | 0.657835  |
| 8             | 1             | 0           | -2.735660               | 1.801247  | 1.461390  |
| 9             | 1             | 0           | -0.768006               | -0.954973 | -1.185894 |
| 10            | 1             | 0           | -2.968746               | -1.725588 | -1.992844 |
| 11            | 6             | 0           | 0.976877                | 0.275389  | 0.348385  |
| 12            | 6             | 0           | 2.008342                | 0.988335  | -0.274531 |
| 13            | 6             | 0           | 1.218768                | -1.072279 | 0.680422  |
| 14            | 6             | 0           | 3.237306                | 0.395683  | -0.575003 |
| 15            | 6             | 0           | 2.428533                | -1.682840 | 0.381109  |
| 16            | 6             | 0           | 3.429584                | -0.941562 | -0.244566 |
| 17            | 1             | 0           | 4.011492                | 0.964305  | -1.065532 |
| 18            | 1             | 0           | 2.638116                | -2.711998 | 0.633415  |
| 19            | 6             | 0           | -0.238767               | 2.076685  | 1.510736  |
| 20            | 7             | 0           | -0.202927               | 3.005050  | 2.203068  |
| 21            | 8             | 0           | -5.227814               | -0.903383 | -1.233566 |
| 22            | 8             | 0           | 4.575220                | -1.617955 | -0.492991 |
| 23            | 6             | 0           | -6.452784               | -0.376183 | -0.768825 |
| 24            | 1             | 0           | -6.531554               | 0.695604  | -0.981237 |
| 25            | 1             | 0           | -7.233007               | -0.908515 | -1.309814 |
| 26            | 1             | 0           | -6.577704               | -0.545639 | 0.306265  |
| 27            | 6             | 0           | 5.646111                | -0.933012 | -1.106619 |
| 28            | 1             | 0           | 6.452731                | -1.658336 | -1.196601 |
| 29            | 1             | 0           | 5.371376                | -0.573846 | -2.104596 |
| 30            | 1             | 0           | 5.984614                | -0.090522 | -0.493605 |
| 31            | 6             | 0           | -0.296828               | 0.934006  | 0.684770  |
| 32            | 8             | 0           | 1.717747                | 2.268564  | -0.583422 |
| 33            | 6             | 0           | 2.736764                | 3.109046  | -1.079654 |
| 34            | 1             | 0           | 3.581675                | 3.161226  | -0.385009 |
| 35            | 1             | 0           | 3.085777                | 2.776632  | -2.063759 |
| 36            | 1             | 0           | 2.286548                | 4.095349  | -1.172851 |
| 37            | 8             | 0           | 0.212118                | -1.701360 | 1.321497  |
| 38            | 6             | 0           | 0.368771                | -3.059954 | 1.670916  |
| 39            | 1             | 0           | 0.528736                | -3.683388 | 0.784625  |
| 40            | 1             | 0           | 1.199529                | -3.197983 | 2.371067  |
| 41            | 1             | 0           | -0.562509               | -3.350475 | 2.153393  |

1.8.16. **DAAN-diOMe/diOMe** of D<sub>0</sub> state optimized with UoB97X-D/6-311+G(d,p)

| Center Number | Atomic Number | Atomic Type | Coordinates (Angstroms) |           |           |
|---------------|---------------|-------------|-------------------------|-----------|-----------|
|               |               |             | X                       | Y         | Z         |
| 1             | 6             | 0           | -3.672925               | -0.117960 | -0.182716 |
| 2             | 6             | 0           | -2.476730               | 0.567785  | -0.395783 |
| 3             | 6             | 0           | -1.258558               | 0.096150  | 0.140400  |
| 4             | 6             | 0           | -1.306330               | -1.105660 | 0.868602  |
| 5             | 6             | 0           | -2.478121               | -1.798663 | 1.079932  |
| 6             | 6             | 0           | -3.672077               | -1.299710 | 0.556187  |
| 7             | 1             | 0           | -4.589184               | 0.262146  | -0.608578 |
| 8             | 1             | 0           | -0.386219               | -1.480553 | 1.301247  |
| 9             | 1             | 0           | -2.498489               | -2.712424 | 1.659749  |
| 10            | 6             | 0           | 1.258585                | 0.096181  | -0.140732 |
| 11            | 6             | 0           | 2.476574                | 0.567714  | 0.395910  |
| 12            | 6             | 0           | 1.306574                | -1.105411 | -0.869251 |
| 13            | 6             | 0           | 3.672857                | -0.117924 | 0.182965  |
| 14            | 6             | 0           | 2.478448                | -1.798317 | -1.080472 |
| 15            | 1             | 0           | 0.386579                | -1.480213 | -1.302228 |

1.8.17. **DAAN-diOMe/triOMe** of D<sub>0</sub> state optimized with UoB97X-D/6-311+G(d,p)

| Center Number | Atomic Number | Atomic Type | Coordinates (Angstroms) |           |           |
|---------------|---------------|-------------|-------------------------|-----------|-----------|
|               |               |             | X                       | Y         | Z         |
| 1             | 6             | 0           | -3.730613               | -0.027119 | -0.184757 |
| 2             | 6             | 0           | -2.606179               | 0.651358  | 0.279905  |
| 3             | 6             | 0           | -1.293894               | 0.212738  | -0.037767 |
| 4             | 6             | 0           | -1.196309               | -0.946607 | -0.838435 |
| 5             | 6             | 0           | -2.298127               | -1.625744 | -1.300348 |
| 6             | 6             | 0           | -3.577241               | -1.166077 | -0.974589 |
| 7             | 1             | 0           | -4.715101               | 0.329779  | 0.077304  |
| 8             | 1             | 0           | -0.208393               | -1.298468 | -1.109549 |
| 9             | 1             | 0           | -2.199757               | -2.506438 | -1.922142 |
| 10            | 6             | 0           | 1.227800                | 0.263165  | 0.239009  |
| 11            | 6             | 0           | 2.203081                | 0.858796  | -0.565860 |
| 12            | 6             | 0           | 1.570833                | -0.917540 | 0.923000  |
| 13            | 6             | 0           | 3.483506                | 0.313036  | -0.697307 |
| 14            | 6             | 0           | 2.832954                | -1.482346 | 0.799428  |
| 15            | 6             | 0           | 3.780875                | -0.858141 | -0.009603 |
| 16            | 1             | 0           | 4.216393                | 0.787989  | -1.330368 |
| 17            | 1             | 0           | 3.121586                | -2.382811 | 1.321613  |
| 18            | 6             | 0           | -0.094723               | 2.169266  | 0.979059  |
| 19            | 7             | 0           | 0.027807                | 3.218869  | 1.455511  |
| 20            | 8             | 0           | -4.611279               | -1.885472 | -1.467671 |
| 21            | 8             | 0           | 4.985225                | -1.476058 | -0.065622 |
| 22            | 6             | 0           | -5.927522               | -1.464958 | -1.181683 |
| 23            | 1             | 0           | -6.120905               | -0.461237 | -1.576369 |
| 24            | 1             | 0           | -6.584535               | -2.177513 | -1.677131 |
| 25            | 1             | 0           | -6.126967               | -1.479858 | -0.104300 |
| 26            | 6             | 0           | 6.006899                | -0.894268 | -0.845690 |
| 27            | 1             | 0           | 6.874687                | -1.541996 | -0.734008 |
| 28            | 1             | 0           | 5.725632                | -0.848196 | -1.903761 |
| 29            | 1             | 0           | 6.258287                | 0.110845  | -0.489417 |
| 30            | 6             | 0           | -0.107280               | 0.882649  | 0.400617  |
| 31            | 8             | 0           | 1.811103                | 1.971600  | -1.220923 |
| 32            | 6             | 0           | 2.772081                | 2.739652  | -1.910712 |
| 33            | 1             | 0           | 3.584954                | 3.048970  | -1.245305 |
| 34            | 1             | 0           | 3.182518                | 2.193848  | -2.768033 |
| 35            | 1             | 0           | 2.244678                | 3.622294  | -2.267445 |
| 36            | 8             | 0           | 0.600126                | -1.437270 | 1.704132  |
| 37            | 6             | 0           | 0.862168                | -2.629602 | 2.411503  |
| 38            | 1             | 0           | 1.099617                | -3.453775 | 1.730086  |
| 39            | 1             | 0           | 1.681450                | -2.497676 | 3.126402  |
| 40            | 1             | 0           | -0.053983               | -2.861173 | 2.951714  |
| 41            | 8             | 0           | -2.686064               | 1.738937  | 1.063346  |
| 42            | 6             | 0           | -3.942111               | 2.293349  | 1.381196  |
| 43            | 1             | 0           | -4.487253               | 2.586776  | 0.477328  |
| 44            | 1             | 0           | -4.548933               | 1.595197  | 1.968783  |
| 45            | 1             | 0           | -3.728692               | 3.177830  | 1.978117  |

1.8.18. **DAAN-triOMe/triOMe** of D<sub>0</sub> state optimized with UoB97X-D/6-311+G(d,p)

| Center Number | Atomic Number | Atomic Type | Coordinates (Angstroms) |           |           |
|---------------|---------------|-------------|-------------------------|-----------|-----------|
|               |               |             | X                       | Y         | Z         |
| 1             | 6             | 0           | -3.683641               | 0.252628  | -0.251381 |
| 2             | 6             | 0           | -2.451204               | 0.881697  | -0.442175 |
| 3             | 6             | 0           | -1.272041               | 0.425060  | 0.172650  |
| 4             | 6             | 0           | -1.379585               | -0.735260 | 0.976559  |
| 5             | 6             | 0           | -2.591301               | -1.380084 | 1.165056  |
| 6             | 6             | 0           | -3.739046               | -0.878284 | 0.553156  |
| 7             | 1             | 0           | -4.565496               | 0.629046  | -0.745588 |
| 8             | 1             | 0           | -2.690120               | -2.254096 | 1.791999  |
| 9             | 6             | 0           | 1.272041                | 0.425065  | -0.172696 |
| 10            | 6             | 0           | 2.451226                | 0.881746  | 0.442070  |
| 11            | 6             | 0           | 1.379579                | -0.735312 | -0.976533 |

|    |   |   |           |           |           |
|----|---|---|-----------|-----------|-----------|
| 12 | 6 | 0 | 3.683656  | 0.252661  | 0.251302  |
| 13 | 6 | 0 | 2.591291  | -1.380152 | -1.164999 |
| 14 | 6 | 0 | 3.739046  | -0.878313 | -0.553152 |
| 15 | 1 | 0 | 4.565523  | 0.629116  | 0.745459  |
| 16 | 1 | 0 | 2.690100  | -2.254205 | -1.791887 |
| 17 | 6 | 0 | -0.000014 | 2.529663  | 0.000051  |
| 18 | 7 | 0 | -0.000081 | 3.688201  | 0.000118  |
| 19 | 8 | 0 | -4.876279 | -1.571196 | 0.802907  |
| 20 | 8 | 0 | 4.876274  | -1.571244 | -0.802870 |
| 21 | 6 | 0 | -6.083127 | -1.112789 | 0.233732  |
| 22 | 1 | 0 | -6.041693 | -1.131025 | -0.861148 |
| 23 | 1 | 0 | -6.855490 | -1.800342 | 0.574197  |
| 24 | 1 | 0 | -6.325763 | -0.099867 | 0.573554  |
| 25 | 6 | 0 | 6.083131  | -1.112804 | -0.233741 |
| 26 | 1 | 0 | 6.855485  | -1.800388 | -0.574165 |
| 27 | 1 | 0 | 6.325771  | -0.099909 | -0.573641 |
| 28 | 1 | 0 | 6.041709  | -1.130960 | 0.861140  |
| 29 | 6 | 0 | 0.000006  | 1.116160  | -0.000023 |
| 30 | 8 | 0 | 2.303444  | 1.934855  | 1.267871  |
| 31 | 8 | 0 | 0.238803  | -1.147575 | -1.567431 |
| 32 | 8 | 0 | -0.238804 | -1.147488 | 1.567477  |
| 33 | 8 | 0 | -2.303405 | 1.934734  | -1.268069 |
| 34 | 6 | 0 | 3.441976  | 2.611835  | 1.749156  |
| 35 | 1 | 0 | 4.011742  | 1.991092  | 2.450409  |
| 36 | 1 | 0 | 4.090919  | 2.931447  | 0.926950  |
| 37 | 1 | 0 | 3.063877  | 3.489114  | 2.270667  |
| 38 | 6 | 0 | 0.258854  | -2.313136 | -2.359065 |
| 39 | 1 | 0 | 0.912705  | -2.194977 | -3.230166 |
| 40 | 1 | 0 | 0.579201  | -3.184996 | -1.777963 |
| 41 | 1 | 0 | -0.766331 | -2.460362 | -2.694670 |
| 42 | 6 | 0 | -0.258878 | -2.312950 | 2.359258  |
| 43 | 1 | 0 | -0.912748 | -2.194677 | 3.230328  |
| 44 | 1 | 0 | -0.579216 | -3.184883 | 1.778260  |
| 45 | 1 | 0 | 0.766298  | -2.460140 | 2.694904  |
| 46 | 6 | 0 | -3.441930 | 2.611791  | -1.749268 |
| 47 | 1 | 0 | -4.011778 | 1.991096  | -2.450496 |
| 48 | 1 | 0 | -4.090799 | 2.931424  | -0.927012 |
| 49 | 1 | 0 | -3.063815 | 3.489058  | -2.270788 |

1.8.19. DAAN-OMe/diOMe-m of D<sub>0</sub> state optimized with UoB97X-D/6-311+G(d,p)

| Center Number | Atomic Number | Atomic Type | Coordinates (Angstroms) |           |           | Z |
|---------------|---------------|-------------|-------------------------|-----------|-----------|---|
|               |               |             | X                       | Y         |           |   |
| 1             | 6             | 0           | -4.162475               | 0.568603  | -0.485469 |   |
| 2             | 6             | 0           | -2.874200               | 1.060181  | -0.626826 |   |
| 3             | 6             | 0           | -1.769119               | 0.412186  | -0.054636 |   |
| 4             | 6             | 0           | -2.020612               | -0.748801 | 0.706427  |   |
| 5             | 6             | 0           | -3.297505               | -1.241804 | 0.856246  |   |
| 6             | 6             | 0           | -4.382203               | -0.594240 | 0.253983  |   |
| 7             | 1             | 0           | -4.980921               | 1.098178  | -0.954630 |   |
| 8             | 1             | 0           | -2.719845               | 1.965451  | -1.203817 |   |
| 9             | 1             | 0           | -1.202202               | -1.244709 | 1.213399  |   |
| 10            | 1             | 0           | -3.488785               | -2.125104 | 1.453477  |   |
| 11            | 6             | 0           | 0.800472                | 0.190096  | -0.132612 |   |
| 12            | 6             | 0           | 2.005543                | 0.832385  | 0.217416  |   |
| 13            | 6             | 0           | 0.838837                | -1.174884 | -0.447998 |   |
| 14            | 6             | 0           | 3.200811                | 0.137074  | 0.275216  |   |
| 15            | 1             | 0           | 1.978961                | 1.886091  | 0.462867  |   |
| 16            | 6             | 0           | 2.039663                | -1.866865 | -0.402512 |   |
| 17            | 1             | 0           | -0.058586               | -1.684492 | -0.773536 |   |
| 18            | 6             | 0           | 3.222032                | -1.237342 | -0.046238 |   |
| 19            | 1             | 0           | 2.084344                | -2.919765 | -0.655012 |   |
| 20            | 6             | 0           | -0.317038               | 2.345569  | -0.438587 |   |
| 21            | 7             | 0           | -0.216621               | 3.484292  | -0.628140 |   |
| 22            | 8             | 0           | -5.592238               | -1.159252 | 0.453891  |   |
| 23            | 8             | 0           | 4.360528                | -1.975240 | 0.038437  |   |
| 24            | 6             | 0           | -6.728207               | -0.539114 | -0.113719 |   |
| 25            | 1             | 0           | -6.658599               | -0.504229 | -1.206302 |   |
| 26            | 1             | 0           | -7.579206               | -1.153903 | 0.172974  |   |
| 27            | 1             | 0           | -6.865361               | 0.474633  | 0.277685  |   |
| 28            | 6             | 0           | 5.384562                | -1.654128 | -0.896896 |   |
| 29            | 1             | 0           | 6.184754                | -2.373297 | -0.727455 |   |
| 30            | 1             | 0           | 5.010150                | -1.760675 | -1.921083 |   |
| 31            | 1             | 0           | 5.760307                | -0.640905 | -0.741877 |   |
| 32            | 6             | 0           | -0.431587               | 0.957467  | -0.203913 |   |
| 33            | 8             | 0           | 4.383691                | 0.682425  | 0.640953  |   |
| 34            | 6             | 0           | 4.410853                | 2.052875  | 0.987992  |   |
| 35            | 1             | 0           | 3.771070                | 2.255607  | 1.853350  |   |
| 36            | 1             | 0           | 5.445000                | 2.274227  | 1.245043  |   |
| 37            | 1             | 0           | 4.100450                | 2.683828  | 0.148393  |   |

1.8.20. DAAN-diOMe-m/diOMe-m of D<sub>0</sub> state optimized with UoB97X-D/6-311+G(d,p)

| Center Number | Atomic Number | Atomic Type | Coordinates (Angstroms) |           |           | Z |
|---------------|---------------|-------------|-------------------------|-----------|-----------|---|
|               |               |             | X                       | Y         |           |   |
| 1             | 6             | 0           | 3.692963                | 0.170824  | 0.315507  |   |
| 2             | 6             | 0           | 2.445555                | 0.766076  | 0.382844  |   |
| 3             | 6             | 0           | 1.289076                | 0.096465  | -0.066505 |   |
| 4             | 6             | 0           | 1.429754                | -1.186801 | -0.612196 |   |
| 5             | 6             | 0           | 2.682450                | -1.775804 | -0.691814 |   |
| 6             | 6             | 0           | 3.817512                | -1.122059 | -0.238162 |   |
| 7             | 1             | 0           | 2.340016                | 1.756425  | 0.806374  |   |

|    |   |   |           |           |           |
|----|---|---|-----------|-----------|-----------|
| 8  | 1 | 0 | 0.569140  | -1.704078 | -1.015340 |
| 9  | 1 | 0 | 2.806200  | -2.762596 | -1.122167 |
| 10 | 6 | 0 | -1.289138 | 0.096492  | 0.066488  |
| 11 | 6 | 0 | -2.445608 | 0.766108  | -0.382876 |
| 12 | 6 | 0 | -1.429830 | -1.186762 | 0.612203  |
| 13 | 6 | 0 | -3.693023 | 0.170871  | -0.315527 |
| 14 | 1 | 0 | -2.340057 | 1.756447  | -0.806424 |
| 15 | 6 | 0 | -2.682533 | -1.775749 | 0.691830  |
| 16 | 1 | 0 | -0.569222 | -1.704040 | 1.015358  |
| 17 | 6 | 0 | -3.817586 | -1.122000 | 0.238166  |
| 18 | 1 | 0 | -2.806294 | -2.762532 | 1.122201  |
| 19 | 6 | 0 | -0.000016 | 2.175677  | -0.000022 |
| 20 | 7 | 0 | 0.000722  | 3.334460  | 0.000018  |
| 21 | 8 | 0 | 5.011643  | -1.768551 | -0.287645 |
| 22 | 8 | 0 | -5.011726 | -1.768475 | 0.287660  |
| 23 | 6 | 0 | 5.994834  | -1.205052 | -1.149658 |
| 24 | 1 | 0 | 6.294133  | -0.210394 | -0.813857 |
| 25 | 1 | 0 | 6.849717  | -1.878825 | -1.113276 |
| 26 | 1 | 0 | 5.614935  | -1.154080 | -2.176036 |
| 27 | 6 | 0 | -5.994905 | -1.204949 | 1.149668  |
| 28 | 1 | 0 | -6.849803 | -1.878704 | 1.113292  |
| 29 | 1 | 0 | -5.615005 | -1.153975 | 2.176045  |
| 30 | 1 | 0 | -6.294184 | -0.210287 | 0.813857  |
| 31 | 6 | 0 | -0.000024 | 0.762947  | -0.000016 |
| 32 | 8 | 0 | -4.835018 | 0.739482  | -0.765727 |
| 33 | 6 | 0 | -4.759678 | 2.027012  | -1.345217 |
| 34 | 1 | 0 | -4.120749 | 2.024836  | -2.234626 |
| 35 | 1 | 0 | -5.777319 | 2.283392  | -1.633634 |
| 36 | 1 | 0 | -4.386352 | 2.766399  | -0.628743 |
| 37 | 8 | 0 | 4.834966  | 0.739482  | 0.765699  |
| 38 | 6 | 0 | 4.759629  | 2.026929  | 1.345253  |
| 39 | 1 | 0 | 5.777265  | 2.283277  | 1.633715  |
| 40 | 1 | 0 | 4.386341  | 2.766361  | 0.628804  |
| 41 | 1 | 0 | 4.120671  | 2.024718  | 2.234641  |

1.9. DAAN radical geometries of D<sub>1</sub> state optimized with UoB97X-D/6-311+G(d,p)

1.9.1. DAAN-H/H of D<sub>1</sub> state optimized with UoB97X-D/6-311+G(d,p)

| Center Number | Atomic Number | Atomic Type | Coordinates (Angstroms) |           |           | Z |
|---------------|---------------|-------------|-------------------------|-----------|-----------|---|
|               |               |             | X                       | Y         |           |   |
| 1             | 6             | 0           | 3.692812                | 0.254601  | 0.355733  |   |
| 2             | 6             | 0           | 2.459379                | 0.845564  | 0.385566  |   |
| 3             | 6             | 0           | 1.276270                | 0.127786  | -0.014460 |   |
| 4             | 6             | 0           | 1.465231                | -1.218203 | -0.491498 |   |
| 5             | 6             | 0           | 2.710016                | -1.791587 | -0.520125 |   |
| 6             | 6             | 0           | 3.846389                | -1.079639 | -0.084448 |   |
| 7             | 1             | 0           | 4.562403                | 0.815717  | 0.678044  |   |
| 8             | 1             | 0           | 2.355349                | 1.868944  | 0.726142  |   |
| 9             | 1             | 0           | 0.617201                | -1.767056 | -0.878641 |   |
| 10            | 1             | 0           | 2.823275                | -2.802118 | -0.896282 |   |
| 11            | 6             | 0           | 0.000000                | 0.769287  | 0.000001  |   |
| 12            | 6             | 0           | -1.276270               | 0.127786  | 0.014460  |   |
| 13            | 6             | 0           | -2.459378               | 0.845564  | -0.385568 |   |
| 14            | 6             | 0           | -1.465232               | -1.218203 | -0.491499 |   |
| 15            | 6             | 0           | -3.692812               | 0.254601  | -0.355734 |   |
| 16            | 1             | 0           | -2.355348               | 1.868944  | -0.726145 |   |
| 17            | 6             | 0           | -2.710016               | -1.791587 | -0.520125 |   |
| 18            | 1             | 0           | -0.617202               | -1.767055 | 0.878643  |   |
| 19            | 6             | 0           | -3.846390               | -1.079638 | 0.084447  |   |
| 20            | 1             | 0           | -4.562402               | 0.815717  | -0.678047 |   |
| 21            | 1             | 0           | -2.823276               | -2.802118 | 0.896283  |   |
| 22            | 6             | 0           | -0.000001               | 2.191179  | -0.000000 |   |
| 23            | 7             | 0           | 0.000000                | 3.347754  | 0.000001  |   |
| 24            | 1             | 0           | 4.823967                | -1.545157 | -0.096329 |   |
| 25            | 1             | 0           | -4.823967               | -1.545157 | 0.096328  |   |

1.9.2. DAAN-H/Me of D<sub>1</sub> state optimized with UoB97X-D/6-311+G(d,p)

| Center Number | Atomic Number | Atomic Type | Coordinates (Angstroms) |           |           | Z |
|---------------|---------------|-------------|-------------------------|-----------|-----------|---|
|               |               |             | X                       | Y         |           |   |
| 1             | 6             | 0           | 4.114687                | -0.075699 | -0.327597 |   |
| 2             | 6             | 0           | 4.110937                | -1.418563 | 0.096503  |   |
| 3             | 6             | 0           | 2.900574                | -2.001534 | 0.504036  |   |
| 4             | 6             | 0           | 1.725601                | -1.288457 | 0.466500  |   |
| 5             | 6             | 0           | 1.697396                | 0.071408  | 0.012006  |   |
| 6             | 6             | 0           | 2.953154                | 0.652530  | -0.364119 |   |
| 7             | 1             | 0           | 5.045546                | 0.388733  | -0.632509 |   |
| 8             | 1             | 0           | 2.891447                | -3.024204 | 0.864323  |   |
| 9             | 1             | 0           | 0.816053                | -1.747509 | 0.830796  |   |
| 10            | 1             | 0           | 2.971923                | 1.685380  | -0.691829 |   |
| 11            | 6             | 0           | 0.501872                | 0.854826  | -0.006496 |   |
| 12            | 6             | 0           | -0.840513               | 0.360233  | -0.013112 |   |
| 13            | 6             | 0           | -1.191275               | -0.950116 | -0.508430 |   |
| 14            | 6             | 0           | -1.933559               | 1.198376  | 0.410636  |   |
| 15            | 6             | 0           | -2.489899               | -1.378588 | -0.523471 |   |
| 16            | 1             | 0           | -0.416671               | -1.583676 | -0.919048 |   |
| 17            | 6             | 0           | -3.220223               | 0.751130  | 0.388151  |   |
| 18            | 1             | 0           | -1.713230               | 2.200192  | 0.759849  |   |
| 19            | 6             | 0           | -3.552210               | -0.561860 | -0.062815 |   |
| 20            | 1             | 0           | -2.718168               | -2.365525 | -0.913430 |   |
| 21            | 1             | 0           | -4.017359               | 1.404954  | 0.727607  |   |
| 22            | 6             | 0           | -0.651758               | 2.266980  | -0.023261 |   |
| 23            | 7             | 0           | 0.764960                | 3.418551  | -0.034987 |   |

|    |   |   |           |           |           |
|----|---|---|-----------|-----------|-----------|
| 24 | 1 | 0 | 5.030254  | -1.990894 | 0.115949  |
| 25 | 6 | 0 | -4.965067 | -1.045760 | -0.027234 |
| 26 | 1 | 0 | -5.089016 | -1.969807 | -0.594933 |
| 27 | 1 | 0 | -5.284754 | -1.241835 | 1.003990  |
| 28 | 1 | 0 | -5.650141 | -0.295085 | -0.433641 |

### 1.9.3. DAAN-H/OMe of D<sub>1</sub> state optimized with UoB97X-D/6-311+G(d,p)

| Center Number | Atomic Number | Atomic Type | Coordinates (Angstroms) |           |           |
|---------------|---------------|-------------|-------------------------|-----------|-----------|
|               |               |             | X                       | Y         | Z         |
| 1             | 6             | 0           | -4.520282               | -0.088832 | -0.250636 |
| 2             | 6             | 0           | -3.362167               | 0.647882  | -0.311248 |
| 3             | 6             | 0           | -2.096888               | 0.072153  | 0.019254  |
| 4             | 6             | 0           | -2.105170               | -1.288884 | 0.454492  |
| 5             | 6             | 0           | -3.276818               | -2.012719 | 0.515425  |
| 6             | 6             | 0           | -4.498456               | -1.434102 | 0.154035  |
| 7             | 1             | 0           | -5.461525               | 0.375940  | -0.522152 |
| 8             | 1             | 0           | -3.397832               | 1.685128  | -0.624067 |
| 9             | 1             | 0           | -1.183969               | -1.751169 | 0.785002  |
| 10            | 1             | 0           | -3.248703               | -3.040882 | 0.859384  |
| 11            | 6             | 0           | -0.904639               | 0.863101  | -0.030790 |
| 12            | 6             | 0           | 0.442188                | 0.364903  | -0.040016 |
| 13            | 6             | 0           | 1.535233                | 1.187248  | 0.428839  |
| 14            | 6             | 0           | 0.794251                | -0.917186 | -0.584240 |
| 15            | 6             | 0           | 2.835367                | 0.765834  | 0.377516  |
| 16            | 1             | 0           | 1.306573                | 2.168554  | 0.826244  |
| 17            | 6             | 0           | 2.087028                | -1.340430 | -0.623334 |
| 18            | 1             | 0           | 0.019359                | -1.540129 | -1.010318 |
| 19            | 6             | 0           | 3.142358                | -0.514469 | -0.134582 |
| 20            | 1             | 0           | 3.617068                | 1.419601  | 0.742557  |
| 21            | 1             | 0           | 2.349523                | -2.304298 | -1.043412 |
| 22            | 6             | 0           | -1.041401               | 2.271380  | -0.066731 |
| 23            | 7             | 0           | -1.129976               | 3.426507  | -0.093531 |
| 24            | 8             | 0           | 4.371184                | -1.044979 | -0.208972 |
| 25            | 6             | 0           | 5.476786                | -0.290011 | 0.258954  |
| 26            | 1             | 0           | 6.352161                | -0.915836 | 0.100852  |
| 27            | 1             | 0           | 5.583602                | 0.639384  | -0.308359 |
| 28            | 1             | 0           | 5.374038                | -0.066009 | 1.324914  |
| 29            | 1             | 0           | -5.414284               | -2.011193 | 0.194215  |

### 1.9.4. DAAN-Me/OMe of D<sub>1</sub> state optimized with UoB97X-D/6-311+G(d,p)

| Center Number | Atomic Number | Atomic Type | Coordinates (Angstroms) |           |           |
|---------------|---------------|-------------|-------------------------|-----------|-----------|
|               |               |             | X                       | Y         | Z         |
| 1             | 6             | 0           | -4.105546               | 0.444578  | -0.298442 |
| 2             | 6             | 0           | -2.888222               | 1.068061  | -0.342311 |
| 3             | 6             | 0           | -1.681450               | 0.377360  | 0.001985  |
| 4             | 6             | 0           | -1.831462               | -0.979804 | 0.436654  |
| 5             | 6             | 0           | -3.065499               | -1.586151 | 0.477403  |
| 6             | 6             | 0           | -4.237705               | -0.908422 | 0.099817  |
| 7             | 1             | 0           | -4.995157               | 0.999532  | -0.580359 |
| 8             | 1             | 0           | -2.824629               | 2.105272  | -0.650673 |
| 9             | 1             | 0           | -0.966382               | -1.527146 | 0.787410  |
| 10            | 1             | 0           | -3.137494               | -2.612733 | 0.823591  |
| 11            | 6             | 0           | -0.421934               | 1.053563  | -0.027666 |
| 12            | 6             | 0           | 0.871643                | 0.436845  | -0.037913 |
| 13            | 6             | 0           | 2.036673                | 1.164514  | 0.399999  |
| 14            | 6             | 0           | 1.103135                | -0.883592 | -0.551625 |
| 15            | 6             | 0           | 3.293662                | 0.622911  | 0.354798  |
| 16            | 1             | 0           | 1.904994                | 2.172419  | 0.774516  |
| 17            | 6             | 0           | 2.353889                | -1.423597 | -0.590791 |
| 18            | 1             | 0           | 0.274130                | -1.445712 | -0.960154 |
| 19            | 6             | 0           | 3.479776                | -0.689727 | -0.128093 |
| 20            | 1             | 0           | 4.133400                | 1.211576  | 0.701295  |
| 21            | 1             | 0           | 2.522760                | -2.416427 | -0.991083 |
| 22            | 6             | 0           | -0.440674               | 2.470761  | -0.036926 |
| 23            | 7             | 0           | -0.441787               | 3.628989  | -0.042921 |
| 24            | 8             | 0           | 4.658434                | -1.329563 | -0.196649 |
| 25            | 6             | 0           | 5.827278                | -0.663099 | 0.247824  |
| 26            | 1             | 0           | 6.644603                | -1.365814 | 0.101275  |
| 27            | 1             | 0           | 6.011977                | 0.240335  | -0.341486 |
| 28            | 1             | 0           | 5.752575                | -0.405245 | 1.308736  |
| 29            | 6             | 0           | -5.576674               | -1.580638 | 0.099352  |
| 30            | 1             | 0           | -5.909629               | -1.789839 | -0.924105 |
| 31            | 1             | 0           | -5.548947               | -2.528990 | 0.639763  |
| 32            | 1             | 0           | -6.338492               | -0.945029 | 0.560519  |

### 1.9.5. DAAN-OMe/OMe of D<sub>1</sub> state optimized with UoB97X-D/6-311+G(d,p)

| Center Number | Atomic Number | Atomic Type | Coordinates (Angstroms) |           |           |
|---------------|---------------|-------------|-------------------------|-----------|-----------|
|               |               |             | X                       | Y         | Z         |
| 1             | 6             | 0           | 3.709035                | 0.580965  | 0.306072  |
| 2             | 6             | 0           | 2.466407                | 1.160069  | 0.357943  |
| 3             | 6             | 0           | 1.276720                | 0.454566  | -0.029110 |
| 4             | 6             | 0           | 1.463891                | -0.883028 | -0.509495 |
| 5             | 6             | 0           | 2.701054                | -1.459952 | -0.557977 |
| 6             | 6             | 0           | 3.850925                | -0.747714 | -0.140138 |
| 7             | 1             | 0           | 4.570376                | 1.157241  | 0.618817  |
| 8             | 1             | 0           | 2.372368                | 2.182464  | 0.704229  |
| 9             | 1             | 0           | 0.614268                | -1.436533 | -0.886817 |

|    |   |   |           |           |           |
|----|---|---|-----------|-----------|-----------|
| 10 | 1 | 0 | 2.832629  | -2.468035 | -0.933521 |
| 11 | 6 | 0 | -1.276657 | 0.454518  | 0.029313  |
| 12 | 6 | 0 | -2.466359 | 1.160081  | -0.357578 |
| 13 | 6 | 0 | -1.463801 | -0.883183 | 0.509406  |
| 14 | 6 | 0 | -3.708976 | 0.580944  | -0.305828 |
| 15 | 1 | 0 | -2.372342 | 2.182555  | -0.703639 |
| 16 | 6 | 0 | -2.700953 | -1.460142 | 0.557765  |
| 17 | 1 | 0 | -0.614167 | -1.436752 | 0.886608  |
| 18 | 6 | 0 | -3.850840 | -0.747836 | 0.140088  |
| 19 | 1 | 0 | -4.570330 | 1.157272  | -0.618442 |
| 20 | 1 | 0 | -2.832508 | -2.468311 | 0.933088  |
| 21 | 6 | 0 | 0.000006  | 2.518742  | 0.000365  |
| 22 | 7 | 0 | -0.000667 | 3.677407  | -0.000653 |
| 23 | 8 | 0 | 5.015228  | -1.419863 | -0.212140 |
| 24 | 8 | 0 | -5.015130 | -1.420024 | 0.211944  |
| 25 | 6 | 0 | 6.205454  | -0.765378 | 0.185537  |
| 26 | 1 | 0 | 6.160918  | -0.471691 | 1.239214  |
| 27 | 1 | 0 | 7.005557  | -1.489155 | 0.044800  |
| 28 | 1 | 0 | 6.397583  | 0.115511  | -0.435366 |
| 29 | 6 | 0 | -6.205370 | -0.765470 | -0.185576 |
| 30 | 1 | 0 | -7.005460 | -1.489291 | -0.044993 |
| 31 | 1 | 0 | -6.397507 | 0.115277  | -0.435526 |
| 32 | 1 | 0 | -6.160849 | -0.471546 | -1.239187 |
| 33 | 6 | 0 | 0.000021  | 1.102524  | 0.000182  |

### 1.9.6. DAAN-SMe/OMe of D<sub>1</sub> state optimized with UoB97X-D/6-311+G(d,p)

| Center Number | Atomic Number | Atomic Type | Coordinates (Angstroms) |           |           |
|---------------|---------------|-------------|-------------------------|-----------|-----------|
|               |               |             | X                       | Y         | Z         |
| 1             | 6             | 0           | 3.332714                | 0.784739  | 0.282913  |
| 2             | 6             | 0           | 2.080704                | 1.323560  | 0.330211  |
| 3             | 6             | 0           | 0.908207                | 0.569079  | -0.034056 |
| 4             | 6             | 0           | 1.137257                | -0.772014 | -0.494147 |
| 5             | 6             | 0           | 2.389144                | -1.308988 | -0.538172 |
| 6             | 6             | 0           | 5.324227                | -0.557231 | -0.135618 |
| 7             | 1             | 0           | 4.174362                | 1.398186  | 0.579415  |
| 8             | 1             | 0           | 1.955018                | 2.349765  | 0.654159  |
| 9             | 1             | 0           | 0.304312                | -1.357645 | -0.859078 |
| 10            | 1             | 0           | 2.522934                | -2.322200 | -0.903531 |
| 11            | 6             | 0           | -1.646135               | 0.479520  | 0.031747  |
| 12            | 6             | 0           | -2.845945               | 1.131512  | -0.370726 |
| 13            | 6             | 0           | -1.787187               | -0.848398 | 0.530797  |
| 14            | 6             | 0           | -4.073542               | 0.509304  | -0.316319 |
| 15            | 1             | 0           | -2.788025               | 2.150416  | -0.735929 |
| 16            | 6             | 0           | -3.007402               | -1.470954 | 0.585237  |
| 17            | 1             | 0           | -0.921365               | -1.367557 | 0.920885  |
| 18            | 6             | 0           | -4.171785               | -0.809536 | 0.152625  |
| 19            | 1             | 0           | -4.950966               | 1.051125  | -0.645023 |
| 20            | 1             | 0           | -3.103373               | -2.476436 | 0.977945  |
| 21            | 6             | 0           | -0.429299               | 2.587382  | -0.022095 |
| 22            | 7             | 0           | -0.456736               | 3.745974  | -0.036679 |
| 23            | 8             | 0           | -5.317485               | -1.516609 | 0.233894  |
| 24            | 6             | 0           | 6.251839                | -0.135513 | 0.352008  |
| 25            | 1             | 0           | 6.044515                | 0.179016  | 1.375173  |
| 26            | 1             | 0           | 7.225458                | -0.623884 | 0.319330  |
| 27            | 1             | 0           | 6.260905                | 0.723992  | -0.318848 |
| 28            | 6             | 0           | -6.523223               | -0.902732 | -0.177158 |
| 29            | 1             | 0           | -7.303781               | -1.645799 | -0.026186 |
| 30            | 1             | 0           | -6.743052               | -0.016738 | 0.427636  |
| 31            | 1             | 0           | -6.485753               | -0.625126 | -1.235803 |
| 32            | 6             | 0           | -0.387536               | 1.173033  | -0.003109 |
| 33            | 16            | 0           | 5.061526                | -1.376414 | -0.199336 |

### 1.9.7. DAAN-F/F of D<sub>1</sub> state optimized with UoB97X-D/6-311+G(d,p)

| Center Number | Atomic Number | Atomic Type | Coordinates (Angstroms) |           |           |
|---------------|---------------|-------------|-------------------------|-----------|-----------|
|               |               |             | X                       | Y         | Z         |
| 1             | 6             | 0           | 3.691661                | 0.486513  | 0.388058  |
| 2             | 6             | 0           | 2.454834                | 1.069125  | 0.408552  |
| 3             | 6             | 0           | 1.276157                | 0.352249  | -0.003818 |
| 4             | 6             | 0           | 1.466912                | -0.992217 | -0.483317 |
| 5             | 6             | 0           | 2.708077                | -1.573865 | -0.505714 |
| 6             | 6             | 0           | 3.813997                | -0.840620 | -0.057501 |
| 7             | 1             | 0           | 4.574721                | 1.022994  | 0.712221  |
| 8             | 1             | 0           | 2.349912                | 2.091456  | 0.751039  |
| 9             | 1             | 0           | 0.623789                | -1.540373 | -0.881163 |
| 10            | 1             | 0           | 2.852795                | -2.580488 | -0.878352 |
| 11            | 6             | 0           | -1.276139               | 0.352241  | 0.003859  |
| 12            | 6             | 0           | -2.454828               | 1.069117  | -0.408481 |
| 13            | 6             | 0           | -1.466881               | -0.992251 | -0.483292 |
| 14            | 6             | 0           | -3.691649               | 0.486490  | -0.388010 |
| 15            | 1             | 0           | -2.349922               | 2.091460  | -0.750935 |
| 16            | 6             | 0           | -2.708040               | -1.573913 | 0.505671  |
| 17            | 1             | 0           | -0.623751               | -1.540422 | 0.881102  |
| 18            | 6             | 0           | -3.813970               | -0.840663 | 0.057494  |
| 19            | 1             | 0           | -4.574714               | 1.022972  | -0.712154 |
| 20            | 1             | 0           | -2.852745               | -2.580557 | 0.878259  |
| 21            | 6             | 0           | 0.000025                | 2.415897  | 0.000098  |
| 22            | 7             | 0           | -0.000200               | 3.572704  | -0.000145 |
| 23            | 6             | 0           | 0.000011                | 0.995479  | 0.000033  |
| 24            | 9             | 0           | 5.020873                | -1.415386 | -0.061183 |
| 25            | 9             | 0           | -5.020838               | -1.415445 | 0.061150  |

1.9.8. **DAAN-F/OMe** of D<sub>1</sub> state optimized with U@B97X-D/6-311+G(d,p)

| Center Number | Atomic Number | Atomic Type | Coordinates (Angstroms) |           |           | Z |
|---------------|---------------|-------------|-------------------------|-----------|-----------|---|
|               |               |             | X                       | Y         |           |   |
| 1             | 6             | 0           | 4.142745                | 0.391883  | -0.300958 |   |
| 2             | 6             | 0           | 2.924094                | 1.024068  | -0.345081 |   |
| 3             | 6             | 0           | 1.713870                | 0.347256  | -0.000848 |   |
| 4             | 6             | 0           | 1.836547                | -1.008766 | 0.429964  |   |
| 5             | 6             | 0           | 3.059283                | -1.643602 | 0.477130  |   |
| 6             | 6             | 0           | 4.200746                | -0.943988 | 0.101289  |   |
| 7             | 1             | 0           | 5.054604                | 0.907682  | -0.575618 |   |
| 8             | 1             | 0           | 2.873597                | 2.061201  | -0.655154 |   |
| 9             | 1             | 0           | 0.961059                | -1.545298 | 0.770941  |   |
| 10            | 1             | 0           | 3.147232                | -2.669383 | 0.813737  |   |
| 11            | 6             | 0           | -0.840757               | 0.436470  | -0.040910 |   |
| 12            | 6             | 0           | -1.995785               | 1.166260  | 0.432487  |   |
| 13            | 6             | 0           | -1.089265               | -0.868394 | -0.588375 |   |
| 14            | 6             | 0           | -3.257265               | 0.640647  | 0.833341  |   |
| 15            | 1             | 0           | -1.847012               | 2.161695  | 0.832677  |   |
| 16            | 6             | 0           | -2.343779               | -1.394859 | -0.626211 |   |
| 17            | 1             | 0           | -0.268614               | -1.425702 | -1.019966 |   |
| 18            | 6             | 0           | -3.461207               | -0.659028 | -0.132261 |   |
| 19            | 1             | 0           | -4.088393               | 1.227827  | 0.752350  |   |
| 20            | 1             | 0           | -2.528196               | -2.375375 | -1.049271 |   |
| 21            | 6             | 0           | 0.488891                | 2.455886  | -0.048217 |   |
| 22            | 7             | 0           | 0.494403                | 3.614690  | -0.060523 |   |
| 23            | 8             | 0           | -4.643206               | -1.287117 | -0.205341 |   |
| 24            | 6             | 0           | -5.805324               | -0.625327 | 0.266953  |   |
| 25            | 1             | 0           | -6.627451               | -1.319637 | 0.109075  |   |
| 26            | 1             | 0           | -5.718511               | -0.396384 | 1.333274  |   |
| 27            | 1             | 0           | -5.988327               | 0.293714  | -0.297740 |   |
| 28            | 6             | 0           | 0.460770                | 1.041461  | -0.031167 |   |
| 29            | 9             | 0           | 5.390384                | -1.565114 | 0.132142  |   |

1.9.9. **DAAN-Br/OMe** of D<sub>1</sub> state optimized with U@B97X-D/6-311+G(d,p)

| Center Number | Atomic Number | Atomic Type | Coordinates (Angstroms) |           |           | Z |
|---------------|---------------|-------------|-------------------------|-----------|-----------|---|
|               |               |             | X                       | Y         |           |   |
| 1             | 6             | 0           | 2.971587                | 1.140214  | 0.315205  |   |
| 2             | 6             | 0           | 1.683850                | 1.604173  | 0.342295  |   |
| 3             | 6             | 0           | 0.569270                | 0.760653  | 0.022781  |   |
| 4             | 6             | 0           | 0.879096                | -0.581204 | -0.375767 |   |
| 5             | 6             | 0           | 2.171710                | -1.044036 | -0.408281 |   |
| 6             | 6             | 0           | 3.230488                | -0.196057 | -0.049112 |   |
| 7             | 1             | 0           | 3.792107                | 1.796551  | 0.577662  |   |
| 8             | 1             | 0           | 1.495939                | 2.634120  | 0.622089  |   |
| 9             | 1             | 0           | 0.086209                | -1.239248 | -0.705508 |   |
| 10            | 1             | 0           | 2.376949                | -2.059560 | -0.724379 |   |
| 11            | 6             | 0           | -1.971245               | 0.507670  | 0.048504  |   |
| 12            | 6             | 0           | -3.203008               | 1.075132  | -0.434072 |   |
| 13            | 6             | 0           | -2.050806               | -0.813593 | 0.599897  |   |
| 14            | 6             | 0           | -4.386625               | 0.387217  | -0.395030 |   |
| 15            | 1             | 0           | -3.184564               | 2.080122  | -0.838103 |   |
| 16            | 6             | 0           | -3.227044               | -1.501815 | 0.631362  |   |
| 17            | 1             | 0           | -1.169211               | -1.256720 | 1.043341  |   |
| 18            | 6             | 0           | -4.422348               | -0.923757 | 0.124971  |   |
| 19            | 1             | 0           | -5.283566               | 0.858615  | -0.775493 |   |
| 20            | 1             | 0           | -3.283712               | -2.495667 | 1.059545  |   |
| 21            | 6             | 0           | -0.917470               | 2.686973  | 0.039816  |   |
| 22            | 7             | 0           | -1.061117               | 3.836111  | 0.037468  |   |
| 23            | 8             | 0           | -5.514005               | -1.698693 | 0.191377  |   |
| 24            | 6             | 0           | -6.747964               | -1.193959 | -0.292281 |   |
| 25            | 1             | 0           | -7.474665               | -1.988213 | -0.137405 |   |
| 26            | 1             | 0           | -7.052991               | -0.304496 | 0.267074  |   |
| 27            | 1             | 0           | -6.683649               | -0.959380 | -1.359014 |   |
| 28            | 6             | 0           | -0.760100               | 1.278695  | 0.041880  |   |
| 29            | 35            | 0           | 5.000133                | -0.841349 | -0.059889 |   |

1.9.10. **DAAN-Ac/OMe** of D<sub>1</sub> state optimized with U@B97X-D/6-311+G(d,p)

| Center Number | Atomic Number | Atomic Type | Coordinates (Angstroms) |           |           | Z |
|---------------|---------------|-------------|-------------------------|-----------|-----------|---|
|               |               |             | X                       | Y         |           |   |
| 1             | 6             | 0           | -3.403197               | 0.919216  | 0.301145  |   |
| 2             | 6             | 0           | -2.145892               | 1.442666  | 0.312969  |   |
| 3             | 6             | 0           | -0.992396               | 0.645760  | -0.030552 |   |
| 4             | 6             | 0           | -1.245639               | -0.705705 | -0.453546 |   |
| 5             | 6             | 0           | -2.505933               | -1.219121 | -0.470190 |   |
| 6             | 6             | 0           | -3.635580               | -0.438175 | -0.070642 |   |
| 7             | 1             | 0           | -4.236425               | 1.550270  | 0.586731  |   |
| 8             | 1             | 0           | -1.994360               | 2.475900  | 0.602852  |   |
| 9             | 1             | 0           | -0.423965               | -1.310909 | -0.813482 |   |
| 10            | 1             | 0           | -2.688996               | -2.233302 | -0.803820 |   |
| 11            | 6             | 0           | 1.552821                | 0.498618  | 0.033473  |   |
| 12            | 6             | 0           | 2.764260                | 1.113440  | -0.407446 |   |
| 13            | 6             | 0           | 1.663036                | -0.817225 | 0.578093  |   |
| 14            | 6             | 0           | 3.972737                | 0.463354  | -0.353504 |   |
| 15            | 1             | 0           | 2.723018                | 2.120749  | -0.804855 |   |
| 16            | 6             | 0           | 2.864154                | -1.466220 | 0.633862  |   |
| 17            | 1             | 0           | 0.787486                | -1.294826 | 0.997226  |   |
| 18            | 6             | 0           | 4.041566                | -0.845705 | 0.157509  |   |

|    |   |   |           |           |           |
|----|---|---|-----------|-----------|-----------|
| 19 | 1 | 0 | 4.859803  | 0.968366  | -0.712589 |
| 20 | 1 | 0 | 2.945077  | -2.459232 | 1.059430  |
| 21 | 6 | 0 | 0.403187  | 2.634469  | -0.037376 |
| 22 | 7 | 0 | 0.487776  | 3.788068  | -0.059634 |
| 23 | 8 | 0 | 5.160979  | -1.577366 | 0.243993  |
| 24 | 6 | 0 | 6.384790  | -1.020637 | -0.206875 |
| 25 | 1 | 0 | 7.137897  | -1.787800 | -0.041931 |
| 26 | 1 | 0 | 6.336596  | -0.779104 | -1.272988 |
| 27 | 1 | 0 | 6.643278  | -0.125402 | 0.366665  |
| 28 | 6 | 0 | 0.311253  | 1.216909  | -0.009061 |
| 29 | 6 | 0 | -4.964659 | -1.055582 | -0.080086 |
| 30 | 8 | 0 | -5.100048 | -2.229043 | -0.405103 |
| 31 | 6 | 0 | -6.164326 | -0.222900 | 0.317714  |
| 32 | 1 | 0 | -6.059076 | 0.151702  | 1.340077  |
| 33 | 1 | 0 | -6.276430 | 0.642180  | -0.342298 |
| 34 | 1 | 0 | -7.056865 | -0.842758 | 0.252368  |

1.9.11. **DAAN-COOMe/OMe** of D<sub>1</sub> state optimized with U@B97X-D/6-311+G(d,p)

| Center Number | Atomic Number | Atomic Type | Coordinates (Angstroms) |           |           | Z |
|---------------|---------------|-------------|-------------------------|-----------|-----------|---|
|               |               |             | X                       | Y         |           |   |
| 1             | 6             | 0           | 2.995481                | 1.041277  | -0.248077 |   |
| 2             | 6             | 0           | 1.722984                | 1.533229  | -0.275059 |   |
| 3             | 6             | 0           | 0.586298                | 0.702074  | 0.022156  |   |
| 4             | 6             | 0           | 0.865947                | -0.654296 | 0.410616  |   |
| 5             | 6             | 0           | 2.144545                | -1.135190 | 0.443898  |   |
| 6             | 6             | 0           | 3.243520                | -0.312947 | 0.097539  |   |
| 7             | 1             | 0           | 3.831068                | 1.682985  | -0.496184 |   |
| 8             | 1             | 0           | 1.552548                | 2.569651  | -0.541796 |   |
| 9             | 1             | 0           | 0.055546                | -1.295880 | 0.729888  |   |
| 10            | 1             | 0           | 2.343252                | -2.155353 | 0.750206  |   |
| 11            | 6             | 0           | -1.955116               | 0.492459  | -0.041227 |   |
| 12            | 6             | 0           | -3.178466               | 1.075899  | 0.431879  |   |
| 13            | 6             | 0           | -2.048584               | -0.819075 | -0.607951 |   |
| 14            | 6             | 0           | -4.373392               | 0.407006  | 0.376726  |   |
| 15            | 1             | 0           | -3.148192               | 2.076325  | 0.846595  |   |
| 16            | 6             | 0           | -3.235745               | -1.488372 | -0.658695 |   |
| 17            | 1             | 0           | -1.168885               | -1.271246 | -1.045811 |   |
| 18            | 6             | 0           | -4.424108               | -0.896641 | -0.157248 |   |
| 19            | 1             | 0           | -5.266055               | 0.888517  | 0.754132  |   |
| 20            | 1             | 0           | -3.304281               | -2.476245 | -1.098479 |   |
| 21            | 6             | 0           | -0.865732               | 2.654006  | -0.001717 |   |
| 22            | 7             | 0           | -0.996639               | 3.803852  | 0.006798  |   |
| 23            | 8             | 0           | -5.526995               | -1.650697 | -0.242599 |   |
| 24            | 6             | 0           | -6.758244               | -1.131371 | 0.234401  |   |
| 25            | 1             | 0           | -7.495014               | -1.913017 | 0.064372  |   |
| 26            | 1             | 0           | -6.700453               | -0.908803 | 1.303945  |   |
| 27            | 1             | 0           | -7.043823               | -0.232113 | -0.319290 |   |
| 28            | 6             | 0           | -0.729299               | 1.241049  | -0.010925 |   |
| 29            | 6             | 0           | 4.592770                | -0.895202 | 0.129491  |   |
| 30            | 8             | 0           | 4.835860                | -2.045540 | 0.418263  |   |
| 31            | 8             | 0           | 5.547586                | -0.007066 | -0.199304 |   |
| 32            | 6             | 0           | 6.884891                | -0.501739 | -0.186643 |   |
| 33            | 1             | 0           | 7.511764                | 0.340305  | -0.472523 |   |
| 34            | 1             | 0           | 7.153190                | -0.857129 | 0.809836  |   |
| 35            | 1             | 0           | 6.997702                | -1.321525 | -0.898353 |   |

1.9.12. **DAAN-CN/OMe** of D<sub>1</sub> state optimized with U@B97X-D/6-311+G(d,p)

| Center Number | Atomic Number | Atomic Type | Coordinates (Angstroms) |           |           | Z |
|---------------|---------------|-------------|-------------------------|-----------|-----------|---|
|               |               |             | X                       | Y         |           |   |
| 1             | 6             | 0           | 3.870806                | 0.714958  | -0.278562 |   |
| 2             | 6             | 0           | 2.630554                | 1.277704  | -0.309182 |   |
| 3             | 6             | 0           | 1.447029                | 0.517950  | -0.003900 |   |
| 4             | 6             | 0           | 1.646203                | -0.848825 | 0.399270  |   |
| 5             | 6             | 0           | 2.890757                | -1.409185 | 0.439190  |   |
| 6             | 6             | 0           | 4.038006                | -0.652848 | 0.082021  |   |
| 7             | 1             | 0           | 4.743574                | 1.303926  | -0.533257 |   |
| 8             | 1             | 0           | 2.523012                | 2.319971  | -0.585014 |   |
| 9             | 1             | 0           | 0.799651                | -1.437945 | 0.725160  |   |
| 10            | 1             | 0           | 3.015183                | -2.436769 | 0.759389  |   |
| 11            | 6             | 0           | -1.102458               | 0.456311  | -0.050323 |   |
| 12            | 6             | 0           | -2.280912               | 1.113853  | 0.433101  |   |
| 13            | 6             | 0           | -1.279052               | -0.849875 | -0.605345 |   |
| 14            | 6             | 0           | -3.514647               | 0.517268  | 0.396794  |   |
| 15            | 1             | 0           | -2.186100               | 2.113301  | 0.840545  |   |
| 16            | 6             | 0           | -2.504514               | -1.448675 | -0.637481 |   |
| 17            | 1             | 0           | -0.433584               | -1.355894 | -1.052001 |   |
| 18            | 6             | 0           | -3.648827               | -0.783944 | -0.127392 |   |
| 19            | 1             | 0           | -4.372623               | 1.053147  | 0.781136  |   |
| 20            | 1             | 0           | -2.637020               | -2.433369 | -1.069594 |   |
| 21            | 6             | 0           | 0.114120                | 2.551086  | -0.055291 |   |
| 22            | 7             | 0           | 0.054046                | 3.706648  | -0.066893 |   |
| 23            | 8             | 0           | -4.794603               | -1.469963 | -0.195594 |   |
| 24            | 6             | 0           | -5.989106               | -0.874673 | 0.288638  |   |
| 25            | 1             | 0           | -6.772193               | -1.612264 | 0.129974  |   |
| 26            | 1             | 0           | -5.908040               | -0.649696 | 1.356029  |   |
| 27            | 1             | 0           | -6.224789               | 0.036275  | -0.269124 |   |
| 28            | 6             | 0           | 0.166568                | 1.132855  | -0.040907 |   |
| 29            | 6             | 0           | 5.320649                | -1.243553 | 0.098006  |   |
| 30            | 7             | 0           | 6.371483                | -1.729994 | 0.111134  |   |

1.9.13. DAAN-NO<sub>2</sub>/OMe of D<sub>1</sub> state optimized with UoB97X-D/6-311+G(d,p)

| Center Number | Atomic Number | Atomic Type | Coordinates (Angstroms) |           |           | Z |
|---------------|---------------|-------------|-------------------------|-----------|-----------|---|
|               |               |             | X                       | Y         |           |   |
| 1             | 6             | 0           | 3.442393                | 0.934313  | -0.313559 |   |
| 2             | 6             | 0           | 2.184040                | 1.454887  | -0.319418 |   |
| 3             | 6             | 0           | 1.033856                | 0.657021  | 0.019185  |   |
| 4             | 6             | 0           | 1.281077                | -0.697499 | 0.439199  |   |
| 5             | 6             | 0           | 2.539840                | -1.221393 | 0.456606  |   |
| 6             | 6             | 0           | 3.634284                | -0.420164 | 0.055416  |   |
| 7             | 1             | 0           | 4.302359                | 1.528360  | -0.590489 |   |
| 8             | 1             | 0           | 2.035323                | 2.488923  | -0.607151 |   |
| 9             | 1             | 0           | 0.459553                | -1.300910 | 0.801610  |   |
| 10            | 1             | 0           | 2.727090                | -2.233508 | 0.788134  |   |
| 11            | 6             | 0           | -1.508210               | 0.503364  | -0.039041 |   |
| 12            | 6             | 0           | -2.717460               | 1.114357  | 0.421718  |   |
| 13            | 6             | 0           | -1.619216               | -0.808477 | -0.595481 |   |
| 14            | 6             | 0           | -3.923234               | 0.463464  | 0.375307  |   |
| 15            | 1             | 0           | -2.672094               | 2.118153  | 0.827162  |   |
| 16            | 6             | 0           | -2.817751               | -1.458914 | -0.643346 |   |
| 17            | 1             | 0           | -0.747007               | -1.277179 | -1.031246 |   |
| 18            | 6             | 0           | -3.993643               | -0.843466 | -0.146870 |   |
| 19            | 1             | 0           | -4.808235               | 0.962191  | 0.747700  |   |
| 20            | 1             | 0           | -2.903217               | -2.447625 | -1.077723 |   |
| 21            | 6             | 0           | -0.370908               | 2.642171  | 0.008437  |   |
| 22            | 7             | 0           | -0.472249               | 3.793865  | 0.017711  |   |
| 23            | 8             | 0           | -5.107258               | -1.576156 | -0.227587 |   |
| 24            | 6             | 0           | -6.333313               | -1.032732 | 0.240669  |   |
| 25            | 1             | 0           | -7.080368               | -1.805216 | 0.075207  |   |
| 26            | 1             | 0           | -6.274814               | -0.801661 | 1.308095  |   |
| 27            | 1             | 0           | -6.602470               | -0.135282 | -0.323520 |   |
| 28            | 6             | 0           | -0.267888               | 1.223589  | -0.003924 |   |
| 29            | 7             | 0           | 4.951540                | -0.978670 | 0.048002  |   |
| 30            | 8             | 0           | 5.890253                | -0.232979 | -0.216181 |   |
| 31            | 8             | 0           | 5.070210                | -2.174083 | 0.305374  |   |

1.9.14. DAAN-OMe/diOMe of D<sub>1</sub> state optimized with UoB97X-D/6-311+G(d,p)

| Center Number | Atomic Number | Atomic Type | Coordinates (Angstroms) |           |           | Z |
|---------------|---------------|-------------|-------------------------|-----------|-----------|---|
|               |               |             | X                       | Y         |           |   |
| 1             | 6             | 0           | -3.999064               | 0.518454  | -0.339735 |   |
| 2             | 6             | 0           | -2.730994               | 1.017311  | -0.548632 |   |
| 3             | 6             | 0           | -1.562295               | 0.310578  | -0.148232 |   |
| 4             | 6             | 0           | -1.778858               | -0.933532 | 0.512866  |   |
| 5             | 6             | 0           | -3.040570               | -1.432137 | 0.720692  |   |
| 6             | 6             | 0           | -4.174395               | -0.720907 | 0.291992  |   |
| 7             | 1             | 0           | -8.4849319              | 1.098046  | -0.676105 |   |
| 8             | 1             | 0           | -2.616962               | 1.978217  | -1.036777 |   |
| 9             | 1             | 0           | -0.932996               | -1.494112 | 0.891188  |   |
| 10            | 1             | 0           | -3.187988               | -2.378248 | 1.228608  |   |
| 11            | 6             | 0           | 0.962830                | 0.107176  | -0.272457 |   |
| 12            | 6             | 0           | 2.206804                | 0.677775  | 0.233284  |   |
| 13            | 6             | 0           | 1.050463                | -1.235148 | -0.727381 |   |
| 14            | 6             | 0           | 3.406927                | -0.022193 | 0.220224  |   |
| 15            | 6             | 0           | 2.224149                | -1.936205 | -0.710388 |   |
| 16            | 1             | 0           | 0.162244                | -1.697611 | -1.137881 |   |
| 17            | 6             | 0           | 3.426313                | -1.334395 | -0.245793 |   |
| 18            | 1             | 0           | 4.305206                | 0.443632  | 0.597701  |   |
| 19            | 1             | 0           | 2.273402                | -2.956140 | -1.072757 |   |
| 20            | 6             | 0           | -0.170622               | 2.233235  | -0.710136 |   |
| 21            | 7             | 0           | -0.137391               | 3.343666  | -1.043331 |   |
| 22            | 8             | 0           | -5.370406               | -1.306627 | 0.533479  |   |
| 23            | 8             | 0           | 4.516955                | -2.122325 | -0.295886 |   |
| 24            | 6             | 0           | -6.542539               | -0.632353 | 0.127018  |   |
| 25            | 1             | 0           | -6.559347               | -0.481981 | -0.958023 |   |
| 26            | 1             | 0           | -7.373608               | -1.273825 | 0.414682  |   |
| 27            | 1             | 0           | -6.640205               | 0.335359  | 0.631088  |   |
| 28            | 6             | 0           | 5.751451                | -1.597977 | 0.151491  |   |
| 29            | 1             | 0           | 6.482614                | -2.391581 | 0.012984  |   |
| 30            | 1             | 0           | 6.045345                | -0.724160 | -0.439699 |   |
| 31            | 1             | 0           | 5.703751                | -1.327935 | 1.211890  |   |
| 32            | 6             | 0           | -0.252291               | 0.872388  | -0.345793 |   |
| 33            | 8             | 0           | 2.075076                | 1.911796  | 0.715438  |   |
| 34            | 6             | 0           | 3.209630                | 2.628176  | 1.157254  |   |
| 35            | 1             | 0           | 3.676402                | 2.134485  | 2.016582  |   |
| 36            | 1             | 0           | 3.937637                | 2.737882  | 0.347378  |   |
| 37            | 1             | 0           | 2.840929                | 3.608094  | 1.450664  |   |

1.9.15. DAAN-OMe/triOMe of D<sub>1</sub> state optimized with UoB97X-D/6-311+G(d,p)

| Center Number | Atomic Number | Atomic Type | Coordinates (Angstroms) |           |           | Z |
|---------------|---------------|-------------|-------------------------|-----------|-----------|---|
|               |               |             | X                       | Y         |           |   |
| 1             | 6             | 0           | -3.984624               | 0.689297  | 0.175672  |   |
| 2             | 6             | 0           | -2.752641               | 1.153159  | 0.576739  |   |
| 3             | 6             | 0           | -1.540383               | 0.513260  | 0.190095  |   |
| 4             | 6             | 0           | -1.674936               | -0.611091 | -0.681143 |   |
| 5             | 6             | 0           | -2.903385               | -1.070114 | -1.085582 |   |
| 6             | 6             | 0           | -4.081885               | -0.437817 | -0.659003 |   |
| 7             | 1             | 0           | -4.872484               | 1.207315  | 0.515920  |   |
| 8             | 1             | 0           | -2.698191               | 2.027516  | 1.214810  |   |
| 9             | 1             | 0           | -0.787805               | -1.108997 | -1.052895 |   |

|    |   |   |           |           |           |  |
|----|---|---|-----------|-----------|-----------|--|
| 10 | 1 | 0 | -2.987842 | -1.926680 | -1.744603 |  |
| 11 | 6 | 0 | 0.974767  | 0.339308  | 0.353879  |  |
| 12 | 6 | 0 | 2.124867  | 0.991124  | -0.225360 |  |
| 13 | 6 | 0 | 1.150351  | -1.051845 | 0.689942  |  |
| 14 | 6 | 0 | 3.309746  | 0.318471  | -0.474552 |  |
| 15 | 6 | 0 | 2.304483  | -1.737291 | 0.388460  |  |
| 16 | 6 | 0 | 3.388747  | -1.049478 | -0.186554 |  |
| 17 | 1 | 0 | 4.146091  | 0.836848  | -0.917644 |  |
| 18 | 1 | 0 | 2.438621  | -2.783057 | 0.626071  |  |
| 19 | 6 | 0 | -0.211257 | 2.296981  | 1.209354  |  |
| 20 | 7 | 0 | -0.193411 | 3.331192  | 1.735989  |  |
| 21 | 8 | 0 | -5.244131 | -0.978117 | -1.098568 |  |
| 22 | 8 | 0 | 4.481140  | -1.801652 | -0.411484 |  |
| 23 | 6 | 0 | -6.457766 | -0.376043 | -0.702209 |  |
| 24 | 1 | 0 | -6.524031 | 0.658517  | -1.056458 |  |
| 25 | 1 | 0 | -7.249899 | -0.964855 | -1.161567 |  |
| 26 | 1 | 0 | -6.576315 | -0.396675 | 0.386805  |  |
| 27 | 6 | 0 | 5.632341  | -1.194915 | -0.967568 |  |
| 28 | 1 | 0 | 6.375681  | -1.985399 | -1.046950 |  |
| 29 | 1 | 0 | 5.424481  | -0.791192 | -1.963671 |  |
| 30 | 1 | 0 | 6.013864  | -0.401300 | -0.317160 |  |
| 31 | 6 | 0 | -0.264293 | 1.028247  | 0.603497  |  |
| 32 | 8 | 0 | 1.925232  | 2.277027  | -0.517623 |  |
| 33 | 6 | 0 | 2.986830  | 3.050241  | -1.034361 |  |
| 34 | 1 | 0 | 3.831899  | 3.067900  | -0.338264 |  |
| 35 | 1 | 0 | 3.314486  | 2.670917  | -2.008911 |  |
| 36 | 1 | 0 | 2.588944  | 4.055949  | -1.147460 |  |
| 37 | 8 | 0 | 0.097340  | -1.590390 | 1.318347  |  |
| 38 | 6 | 0 | 0.098605  | -2.976806 | 1.586568  |  |
| 39 | 1 | 0 | 0.200222  | -3.554822 | 0.661741  |  |
| 40 | 1 | 0 | 0.905264  | -3.243227 | 2.278050  |  |
| 41 | 1 | 0 | -0.863159 | -3.190187 | 2.047647  |  |

1.9.16. DAAN-diOMe/diOMe of D<sub>1</sub> state optimized with UoB97X-D/6-311+G(d,p)

| Center Number | Atomic Number | Atomic Type | Coordinates (Angstroms) |           |           | Z |
|---------------|---------------|-------------|-------------------------|-----------|-----------|---|
|               |               |             | X                       | Y         |           |   |
| 1             | 6             | 0           | -3.712588               | -0.073958 | -0.162997 |   |
| 2             | 6             | 0           | -2.504365               | 0.580761  | -0.372431 |   |
| 3             | 6             | 0           | -1.248296               | 0.058802  | 0.121721  |   |
| 4             | 6             | 0           | -1.331574               | -1.195761 | 0.782309  |   |
| 5             | 6             | 0           | -2.516321               | -1.857241 | 0.967792  |   |
| 6             | 6             | 0           | -3.729153               | -1.295879 | 0.507920  |   |
| 7             | 1             | 0           | -4.626203               | 0.356150  | -0.546032 |   |
| 8             | 1             | 0           | -0.421784               | -1.625373 | 1.183210  |   |
| 9             | 1             | 0           | -2.552903               | -2.807710 | 1.486410  |   |
| 10            | 6             | 0           | 1.248298                | 0.058767  | -0.121781 |   |
| 11            | 6             | 0           | 2.504340                | 0.580741  | 0.372420  |   |
| 12            | 6             | 0           | 1.331602                | -1.195802 | -0.782358 |   |
| 13            | 6             | 0           | 3.712581                | -0.073956 | 0.163018  |   |
| 14            | 6             | 0           | 2.516362                | -1.857266 | -0.967797 |   |
| 15            | 1             | 0           | 0.421829                | -1.625426 | -1.183283 |   |
| 16            | 6             | 0           | 3.729179                | -1.295879 | -0.507984 |   |
| 17            | 1             | 0           | 4.626180                | 0.356170  | 0.546068  |   |
| 18            | 1             | 0           | 2.552975                | -2.807738 | -1.486406 |   |
| 19            | 6             | 0           | 0.000088                | 2.181080  | 0.000025  |   |
| 20            | 7             | 0           | 0.000028                | 3.339826  | 0.000076  |   |
| 21            | 8             | 0           | -4.840849               | -2.022777 | 0.757267  |   |
| 22            | 8             | 0           | 4.840891                | -2.022756 | -0.757224 |   |
| 23            | 6             | 0           | -6.085784               | -1.520360 | 0.320921  |   |
| 24            | 1             | 0           | -6.112486               | -1.417818 | -0.769648 |   |
| 25            | 1             | 0           | -6.830875               | -2.250130 | 0.631964  |   |
| 26            | 1             | 0           | -6.308486               | -0.553632 | 0.785916  |   |
| 27            | 6             | 0           | 6.085809                | -1.520314 | -0.320859 |   |
| 28            | 1             | 0           | 6.830921                | -2.250065 | -0.631900 |   |
| 29            | 1             | 0           | 6.308494                | -0.553577 | -0.785843 |   |
| 30            | 1             | 0           | 6.112496                | -1.417781 | 0.769711  |   |
| 31            | 6             | 0           | 0.000013                | 0.766110  | -0.000056 |   |
| 32            | 8             | 0           | -2.397184               | 1.716764  | -1.069126 |   |
| 33            | 8             | 0           | 2.397097                | 1.716761  | 1.069080  |   |
| 34            | 6             | 0           | -3.554091               | 2.385927  | -1.517050 |   |
| 35            | 1             | 0           | -4.104287               | 1.782394  | -2.248207 |   |
| 36            | 1             | 0           | -4.209474               | 2.639426  | -0.677084 |   |
| 37            | 1             | 0           | -3.199795               | 3.299899  | -1.988650 |   |
| 38            | 6             | 0           | 3.553968                | 2.385986  | 1.517007  |   |
| 39            | 1             | 0           | 4.104173                | 1.782500  | 2.248195  |   |
| 40            | 1             | 0           | 4.209358                | 2.639486  | 0.677046  |   |
| 41            | 1             | 0           | 3.199626                | 3.299959  | 1.988570  |   |

1.9.17. DAAN-diOMe/triOMe of D<sub>1</sub> state optimized with UoB97X-D/6-311+G(d,p)

| Center Number | Atomic Number | Atomic Type | Coordinates (Angstroms) |           |           | Z |
|---------------|---------------|-------------|-------------------------|-----------|-----------|---|
|               |               |             | X                       | Y         |           |   |
| 1             | 6             | 0           | -3.713550               | 0.058592  | -0.023400 |   |
| 2             | 6             | 0           | -2.532216               | 0.683202  | 0.355890  |   |
| 3             | 6             | 0           | -1.239954               | 0.311859  | -0.203320 |   |
| 4             | 6             | 0           | -1.260935               | -0.785986 | -1.105785 |   |
| 5             | 6             | 0           | -2.416564               | -1.428305 | -1.448993 |   |
| 6             | 6             | 0           | -3.667112               | -0.999747 | -0.928624 |   |
| 7             | 1             | 0           | -4.651581               | 0.376993  | 0.407067  |   |
| 8             | 1             | 0           | -0.319922               | -1.104168 | -1.538576 |   |
| 9             | 1             | 0           | -2.410940               | -2.266845 | -2.135355 |   |
| 10            | 6             | 0           | 1.249643                | 0.329038  | 0.130031  |   |

|    |   |   |           |           |           |
|----|---|---|-----------|-----------|-----------|
| 11 | 6 | 0 | 2.451626  | 0.883952  | -0.387902 |
| 12 | 6 | 0 | 1.365941  | -0.971760 | 0.700196  |
| 13 | 6 | 0 | 3.659944  | 0.192679  | -0.366648 |
| 14 | 6 | 0 | 2.548755  | -1.688337 | 0.687243  |
| 15 | 6 | 0 | 3.698980  | -1.097617 | 0.160314  |
| 16 | 1 | 0 | 4.546349  | 0.644603  | -0.784371 |
| 17 | 1 | 0 | 2.632756  | -2.676933 | 1.115608  |
| 18 | 6 | 0 | -0.080301 | 2.413941  | 0.277231  |
| 19 | 7 | 0 | -0.155613 | 3.564379  | 0.414949  |
| 20 | 8 | 0 | -4.740020 | -1.693524 | -1.363482 |
| 21 | 8 | 0 | 4.818934  | -1.859124 | 0.213910  |
| 22 | 6 | 0 | -6.017741 | -1.326867 | -0.885789 |
| 23 | 1 | 0 | -6.257046 | -0.291757 | -1.152556 |
| 24 | 1 | 0 | -6.724382 | -1.997886 | -1.370088 |
| 25 | 1 | 0 | -6.084671 | -1.451363 | 0.200584  |
| 26 | 6 | 0 | 6.026927  | -1.317717 | -0.273811 |
| 27 | 1 | 0 | 6.783565  | -2.085139 | -0.119695 |
| 28 | 1 | 0 | 5.959487  | -1.087950 | -1.343136 |
| 29 | 1 | 0 | 6.311087  | -0.414328 | 0.277245  |
| 30 | 6 | 0 | -0.022883 | 1.018033  | 0.108423  |
| 31 | 8 | 0 | 2.318800  | 2.101862  | -0.939325 |
| 32 | 6 | 0 | 3.456889  | 2.789323  | -1.401449 |
| 33 | 1 | 0 | 4.189679  | 2.928139  | -0.598793 |
| 34 | 1 | 0 | 3.927331  | 2.267156  | -2.243303 |
| 35 | 1 | 0 | 3.097937  | 3.761651  | -1.732962 |
| 36 | 8 | 0 | 0.227373  | -1.439416 | 1.259891  |
| 37 | 6 | 0 | 0.172425  | -2.787340 | 1.668384  |
| 38 | 1 | 0 | 0.414376  | -3.463062 | 0.840680  |
| 39 | 1 | 0 | 0.853347  | -2.977188 | 2.505475  |
| 40 | 1 | 0 | -0.852724 | -2.959921 | 1.992124  |
| 41 | 8 | 0 | -2.464840 | 1.651175  | 1.268542  |
| 42 | 6 | 0 | -3.646518 | 2.183050  | 1.826000  |
| 43 | 1 | 0 | -4.291958 | 2.597101  | 1.044576  |
| 44 | 1 | 0 | -4.191789 | 1.421903  | 2.395571  |
| 45 | 1 | 0 | -3.323710 | 2.980591  | 2.491071  |

1.9.18. **DAAN-triOMe/triOMe** of D<sub>1</sub> state optimized with UøB97X-D/6-311+G(d,p)

| Center Number | Atomic Number | Atomic Type | Coordinates (Angstroms) |           |           |
|---------------|---------------|-------------|-------------------------|-----------|-----------|
|               |               |             | X                       | Y         | Z         |
| 1             | 6             | 0           | -3.658571               | 0.222896  | -0.131752 |
| 2             | 6             | 0           | -2.498889               | 0.961540  | -0.311415 |
| 3             | 6             | 0           | -1.235970               | 0.539813  | 0.213371  |
| 4             | 6             | 0           | -1.262941               | -0.678543 | 0.972217  |
| 5             | 6             | 0           | -2.400317               | -1.448444 | 1.108985  |
| 6             | 6             | 0           | -3.603703               | -0.989874 | 0.566452  |
| 7             | 1             | 0           | -4.587551               | 0.567920  | -0.559452 |
| 8             | 1             | 0           | -2.410815               | -2.372741 | 1.669325  |
| 9             | 6             | 0           | 1.236036                | 0.539799  | -0.213273 |
| 10            | 6             | 0           | 2.499027                | 0.961498  | 0.311307  |
| 11            | 6             | 0           | 1.262851                | -0.678571 | -0.972061 |
| 12            | 6             | 0           | 3.658653                | 0.222782  | 0.131533  |
| 13            | 6             | 0           | 2.400172                | -1.448544 | -1.108956 |
| 14            | 6             | 0           | 3.603642                | -0.990016 | -0.566604 |
| 15            | 1             | 0           | 4.587703                | 0.567783  | 0.559099  |
| 16            | 1             | 0           | 2.410540                | -2.372864 | -1.669260 |
| 17            | 6             | 0           | 0.000020                | 2.660259  | 0.000229  |
| 18            | 7             | 0           | -0.000026               | 3.820355  | 0.000323  |
| 19            | 8             | 0           | -4.677614               | -1.787272 | 0.776841  |
| 20            | 8             | 0           | 4.677497                | -1.787478 | -0.777089 |
| 21            | 6             | 0           | -5.936829               | -1.372345 | 0.291969  |
| 22            | 1             | 0           | -5.935986               | -1.285921 | -0.800264 |
| 23            | 1             | 0           | -6.642007               | -2.146502 | 0.589244  |
| 24            | 1             | 0           | -6.240077               | -0.417602 | 0.735156  |
| 25            | 6             | 0           | 5.936787                | -1.372573 | -0.292404 |
| 26            | 1             | 0           | 6.641900                | -2.146772 | -0.589726 |
| 27            | 1             | 0           | 6.240016                | -0.417865 | -0.735682 |
| 28            | 1             | 0           | 5.936092                | -1.286086 | 0.799824  |
| 29            | 6             | 0           | 0.000049                | 1.251380  | 0.000123  |
| 30            | 8             | 0           | 2.447184                | 2.090569  | 1.030133  |
| 31            | 8             | 0           | 0.074018                | -1.003639 | -1.518758 |
| 32            | 8             | 0           | -0.074207               | -1.003635 | 1.519081  |
| 33            | 8             | 0           | -2.446881               | 2.090564  | -1.030288 |
| 34            | 6             | 0           | 3.633892                | 2.646188  | 1.544119  |
| 35            | 1             | 0           | 4.102759                | 1.978834  | 2.277365  |
| 36            | 1             | 0           | 4.345574                | 2.869604  | 0.741441  |
| 37            | 1             | 0           | 3.337506                | 3.572485  | 2.031754  |
| 38            | 6             | 0           | -0.090424               | -2.286142 | -2.081407 |
| 39            | 1             | 0           | 0.519425                | -2.402781 | -2.983947 |
| 40            | 1             | 0           | 0.171091                | -3.069505 | -1.361666 |
| 41            | 1             | 0           | -1.144554               | -2.365003 | -2.341394 |
| 42            | 6             | 0           | 0.090059                | -2.286070 | 2.081939  |
| 43            | 1             | 0           | -0.519948               | -2.402542 | 2.984394  |
| 44            | 1             | 0           | -0.171386               | -3.069517 | 1.362264  |
| 45            | 1             | 0           | 1.144141                | -2.364961 | 2.342109  |
| 46            | 6             | 0           | -3.633490               | 2.646232  | -1.544456 |
| 47            | 1             | 0           | -4.102303               | 1.978866  | -2.277726 |
| 48            | 1             | 0           | -4.345257               | 2.869733  | -0.741878 |
| 49            | 1             | 0           | -3.336984               | 3.572486  | -2.032099 |

1.9.19. **DAAN-OMe/diOMe-m** of D<sub>1</sub> state optimized with UøB97X-D/6-311+G(d,p)

| Center | Atomic | Atomic | Coordinates (Angstroms) |   |   |
|--------|--------|--------|-------------------------|---|---|
|        |        |        | X                       | Y | Z |

| Number | Number | Type | X         | Y         | Z         |
|--------|--------|------|-----------|-----------|-----------|
| 1      | 6      | 0    | -4.147717 | 0.596671  | -0.528083 |
| 2      | 6      | 0    | -2.845779 | 1.061643  | -0.590153 |
| 3      | 6      | 0    | -1.773571 | 0.386754  | 0.031920  |
| 4      | 6      | 0    | -2.102575 | -0.791397 | 0.744898  |
| 5      | 6      | 0    | -3.393754 | -1.264053 | 0.808618  |
| 6      | 6      | 0    | -4.434661 | -0.581409 | 0.165906  |
| 7      | 1      | 0    | -4.928009 | 1.155700  | -1.028215 |
| 8      | 1      | 0    | -2.642597 | 1.978614  | -1.132219 |
| 9      | 1      | 0    | -1.334616 | -1.316737 | 1.299790  |
| 10     | 1      | 0    | -3.632131 | -2.161230 | 1.367860  |
| 11     | 6      | 0    | 0.784560  | 0.199543  | 0.033496  |
| 12     | 6      | 0    | 2.015728  | 0.864304  | 0.175339  |
| 13     | 6      | 0    | 0.858319  | -1.251940 | -0.123742 |
| 14     | 6      | 0    | 3.219354  | 0.174806  | 0.184727  |
| 15     | 1      | 0    | 2.013277  | 1.939084  | 0.290805  |
| 16     | 6      | 0    | 2.061365  | -1.931535 | -0.122385 |
| 17     | 1      | 0    | -0.052007 | -1.807922 | -0.296291 |
| 18     | 6      | 0    | 3.269254  | -1.269710 | 0.014260  |
| 19     | 1      | 0    | 2.080422  | -3.008021 | -0.246651 |
| 20     | 6      | 0    | -0.308497 | 2.334219  | -0.179109 |
| 21     | 7      | 0    | -0.169075 | 3.478756  | -0.313968 |
| 22     | 8      | 0    | -5.665658 | -1.133256 | 0.277657  |
| 23     | 8      | 0    | 4.433125  | -1.949981 | 0.090603  |
| 24     | 6      | 0    | -6.751447 | -0.481676 | -0.346566 |
| 25     | 1      | 0    | -6.610033 | -0.421103 | -1.431352 |
| 26     | 1      | 0    | -7.629616 | -1.087901 | -0.131521 |
| 27     | 1      | 0    | -6.898589 | 0.525390  | 0.058955  |
| 28     | 6      | 0    | 5.365424  | -1.765872 | -0.969018 |
| 29     | 1      | 0    | 6.210678  | -2.414426 | -0.744850 |
| 30     | 1      | 0    | 4.913066  | -2.066590 | -1.919444 |
| 31     | 1      | 0    | 5.703320  | -0.729312 | -1.026910 |
| 32     | 6      | 0    | -0.431807 | 0.939693  | -0.010364 |
| 33     | 8      | 0    | 4.395048  | 0.746819  | 0.370752  |
| 34     | 6      | 0    | 4.474542  | 2.155562  | 0.586368  |
| 35     | 1      | 0    | 3.922595  | 2.434139  | 1.486362  |
| 36     | 1      | 0    | 5.532596  | 2.368325  | 0.715548  |
| 37     | 1      | 0    | 4.082637  | 2.698419  | -0.276458 |

1.9.20. **DAAN-diOMe-m/diOMe-m** of D<sub>1</sub> state optimized with UøB97X-D/6-311+G(d,p)

| Center Number | Atomic Number | Atomic Type | Coordinates (Angstroms) |           |           |
|---------------|---------------|-------------|-------------------------|-----------|-----------|
|               |               |             | X                       | Y         | Z         |
| 1             | 6             | 0           | 3.702499                | 0.225169  | 0.275364  |
| 2             | 6             | 0           | 2.438759                | 0.768598  | 0.326855  |
| 3             | 6             | 0           | 1.284956                | 0.018546  | -0.006251 |
| 4             | 6             | 0           | 1.502301                | -1.348890 | -0.402145 |
| 5             | 6             | 0           | 2.771144                | -1.885758 | -0.467229 |
| 6             | 6             | 0           | 3.897259                | -1.136965 | -0.149226 |
| 7             | 1             | 0           | 2.307614                | 1.794962  | 0.640257  |
| 8             | 1             | 0           | 0.668335                | -1.956140 | -0.721956 |
| 9             | 1             | 0           | 2.919441                | -2.911590 | -0.783950 |
| 10            | 6             | 0           | -1.284945               | 0.018526  | 0.006245  |
| 11            | 6             | 0           | -2.438759               | 0.768551  | 0.326889  |
| 12            | 6             | 0           | -1.502269               | -1.348893 | 0.402210  |
| 13            | 6             | 0           | -3.702491               | 0.225102  | -0.275378 |
| 14            | 1             | 0           | -2.307630               | 1.794909  | -0.640313 |
| 15            | 6             | 0           | -2.771105               | -1.885777 | 0.467318  |
| 16            | 1             | 0           | -0.668295               | -1.956115 | 0.722054  |
| 17            | 6             | 0           | -3.897224               | -1.137015 | 0.149258  |
| 18            | 1             | 0           | -2.919392               | -2.911595 | 0.784088  |
| 19            | 6             | 0           | -0.000015               | 2.068349  | -0.000051 |
| 20            | 7             | 0           | 0.000044                | 3.228125  | -0.000066 |
| 21            | 8             | 0           | 5.112307                | -1.729418 | -0.156209 |
| 22            | 8             | 0           | -5.112279               | -1.729448 | 0.156253  |
| 23            | 6             | 0           | 6.105390                | -1.188170 | -1.025828 |
| 24            | 1             | 0           | 6.397947                | -0.183078 | -0.719988 |
| 25            | 1             | 0           | 6.959551                | -1.860047 | -0.957241 |
| 26            | 1             | 0           | 5.733887                | -1.173422 | -2.055723 |
| 27            | 6             | 0           | -6.105377               | -1.188008 | 1.025729  |
| 28            | 1             | 0           | -6.959579               | -1.859837 | 0.957196  |
| 29            | 1             | 0           | -5.733934               | -1.173113 | 2.055643  |
| 30            | 1             | 0           | -6.397842               | -0.182942 | 0.719699  |
| 31            | 6             | 0           | 0.000000                | 0.654139  | -0.000016 |
| 32            | 8             | 0           | -4.817653               | 0.875952  | -0.629858 |
| 33            | 6             | 0           | -4.712432               | 2.213570  | -1.093745 |
| 34            | 1             | 0           | -4.098425               | 2.264034  | -1.997296 |
| 35            | 1             | 0           | -5.729024               | 2.526378  | -1.321945 |
| 36            | 1             | 0           | -4.287610               | 2.863195  | -0.323246 |
| 37            | 8             | 0           | 4.817622                | 0.876058  | 0.629892  |
| 38            | 6             | 0           | 4.712315                | 2.213671  | 1.093776  |
| 39            | 1             | 0           | 5.728881                | 2.526528  | 1.322027  |
| 40            | 1             | 0           | 4.287498                | 2.863273  | 0.323256  |
| 41            | 1             | 0           | 4.098260                | 2.264103  | 1.997296  |
